## Title: Novel tetraplex qPCR assays for simultaneous detection and identification of *Xylella fastidiosa* subspecies in plant tissues.

1 Dupas Enora<sup>1,2</sup>, Briand Martial<sup>1</sup>, Jacques Marie-Agnès<sup>1\*</sup>, Cesbron Sophie<sup>1\*</sup>

2 <sup>1</sup> IRHS, Agrocampus-Ouest, INRA, University of Angers, SFR 4207 QuaSaV, 49071, Beaucouzé,  
3 France

4 <sup>2</sup> French Agency for Food, Environmental and Occupational Health & Safety, Plant Health Laboratory,  
5 Angers, France

6 \* Correspondance:

7 Sophie Cesbron

8 [sophie.cesbron@inra.fr](mailto:sophie.cesbron@inra.fr)

9 Marie-Agnès Jacques

10 [marie-agnes.jacques@inra.fr](mailto:marie-agnes.jacques@inra.fr)

11

12 **Keywords: real-time PCR, TaqMan, subspecies differentiation, diagnostic, SkIf, multiplexing.**

13 **Number of words: 6742**

14 **Number of words abstract: 294**

15 **Number of figures: 0**

16 **Number of tables: 7**

17 **Number of supplemental data: 9**

18 Running title: *in planta* identification of *Xylella fastidiosa* subspecies

19 **Abstract**

20 *Xylella fastidiosa* is an insect-borne bacterium confined to the xylem vessels of plants. This plant  
21 pathogen has a broad host range estimated to 560 plant species. Five subspecies of the pathogen with  
22 different but overlapping host ranges have been described, but only three subspecies are widely  
23 accepted, namely subspecies *fastidiosa*, *multiplex* and *pauca*. Initially limited to the Americas, *Xf* has  
24 been detected in Europe since 2013. As management of *X. fastidiosa* outbreaks in Europe depends on  
25 the identification of the subspecies, accurate determination of the subspecies in infected plants as early  
26 as possible is of major interest. Thus, we developed various tetraplex and triplex qPCR assays for *in*  
27 *planta* *X. fastidiosa* detection and subspecies identification in a single reaction. We designed primers  
28 and probes using SkIf, a bioinformatics tool based on *k*-mers, to detect specific signatures of the species  
29 and subspecies from a dataset of 58 genome sequences representative of *X. fastidiosa* diversity. We  
30 tested the qPCR assays on 39 target and 30 non-target strains, as well as on 13 different plant species  
31 spiked with strains of the different subspecies of *X. fastidiosa*, and on samples from various

32 environmental and inoculated host plants. Sensitivity of simplex assays was equal or slightly better  
33 than the reference protocol on purified DNA. Tetraplex qPCR assays had the same sensitivity than the  
34 reference protocol and allowed *X. fastidiosa* detection in all spiked matrices up to  $10^3$  cells.mL<sup>-1</sup>.  
35 Moreover, mix infections of two to three subspecies could be detected in the same sample with tetraplex  
36 assays. In environmental plant samples, the tetraplex qPCR assays allowed subspecies identification  
37 when the current method based on multilocus sequence typing failed. The qPCR assays described here  
38 are robust and modular tools that are efficient for differentiating *X. fastidiosa* subspecies directly in  
39 plant samples.

## 40 1 Introduction

41 *Xylella fastidiosa* (*Xf*) is a worldwide insect-transmitted plant pathogenic bacterium that presents a very  
42 large host range. Altogether, 563 plant species grouped into 82 botanical families have been reported  
43 as *Xf* hosts (EFSA, 2018a). Plants with a major socio-economic interest such as grapevine, citrus,  
44 coffee, and olive trees are hosts of *Xf* (EFSA, 2018a). Forest trees, shade trees, ornamentals and  
45 landscape species are included in the host plant database making this pathogen a potential worldwide  
46 threat (EFSA, 2018a). Disease management of *Xf* is impeded by its asymptomatic period that can last  
47 several years (EFSA, 2018b).

48 This bacterial species is genetically diverse as five subspecies including *fastidiosa*, *morus*, *multiplex*,  
49 *pauca* and *sandyi* are currently described (EFSA, 2018b). Although this subspecies delineation was  
50 initially associated to *Xf* host range and places of occurrence, more and more observations report  
51 infection of a given host by various subspecies (Denancé *et al.*, 2017, 2019; EPPO, 2018b; Nunney *et al.*,  
52 2019). Based on genome sequence analyses, it was proposed to merge the subspecies *fastidiosa*,  
53 *morus* and *sandyi* in the subspecies *fastidiosa* (hereafter referred to *Xff sensu lato* (*Xffsl*) to avoid  
54 confusion with classical *Xff*), the subspecies *multiplex* and *pauca* remaining coherent groups and  
55 distantly related from *Xff* (Denancé *et al.*, 2019; Marcelletti and Scortichini, 2016). The method  
56 generally used to identify strains at the subspecies level is based on the sequencing of seven  
57 housekeeping genes (*cysG*, *gltT*, *holC*, *leuA*, *malF*, *nuoL* and *petC*) of the dedicated MultiLocus  
58 Sequence Typing (MLST) scheme (Yuan *et al.*, 2010).

59 In Europe, *Xf* has been reported for the first time in Apulia area, Italy, in olive trees (Saponari *et al.*,  
60 2013). Then, *Xf* was detected in 2015 in France, more precisely in Corsica and in the French Riviera  
61 region, mainly on *Polygala myrtifolia* and other ornamentals (Denancé *et al.*, 2017). Two years later,  
62 *Xf* has been reported in the Balearic Islands mostly in olive tree, grapevine and sweet cherry and in  
63 continental Spain in almond trees (Landa, 2017). More recently, in October 2018, the presence of  
64 *X. fastidiosa* subsp. *multiplex* was reported in Monte Argentario (Tuscany, Italy), and in January 2019  
65 the subsp. *multiplex* was identified in Portugal (region of Porto), and both reports concerned  
66 ornamentals (EPPO, 2019). Since the first report, four subspecies, *fastidiosa*, *multiplex*, *pauca* and  
67 *sandyi* have been identified in Europe (Cruaud *et al.*, 2018; Denancé *et al.*, 2017; Jacques *et al.*, 2016).  
68 A number of cases of imported plants being infected by *Xf* has also been reported in Europe since 2012  
69 (EPPO, 2019). Being present in Europe, *Xf* that was first listed as an A1 regulated pathogen. *Xf* is now  
70 reported in the Annex I/A2 of the directive 2000/29/CE and in the EPPO A2 list (C/2017/4883, 2017;  
71 EPPO, 2018a).

72 Apart the sympatry of several subspecies at the local, regional or state level, cases of mix infection of  
73 plants have been described. In 2005 in California, an almond tree has been reported infected by two  
74 types of *Xf* strains, revealing the first case of mix infection by *Xf* (Chen *et al.*, 2005). Recently, in coffee  
75 trees imported into Europe from Central America, the MLST revealed a mix infection with two

76 different sequence types (STs) of *Xf* from two subspecies: *pauca* and *fastidiosa* (Bergsma-Vlami *et al.*,  
77 2017). In France, a *Polygala myrtifolia* plant was found mix infected with strains of two different STs  
78 (Denancé *et al.*, 2017). Reported cases of undetermined sequences of housekeeping gene alleles was  
79 an indication of mix infections in plants (Denancé *et al.*, 2017).

80 Because in Europe the subspecies identification is necessary to set up outbreak management, it is of  
81 major interest to have access to reliable tools for the detection and identification of *Xf*. As *Xf* isolation  
82 is tedious, detection and identification of subspecies are performed directly on plant extracts (Denancé  
83 *et al.*, 2017). To date, tests based on loop-mediated isothermal amplification (LAMP) (Harper *et al.*,  
84 2010), conventional PCR (Hernandez-Martinez *et al.*, 2006; Minsavage *et al.*, 1994), and quantitative  
85 PCR (qPCR) (Francis *et al.*, 2006; Harper *et al.*, 2010; Li *et al.*, 2013; Ouyang *et al.*, 2013) targeting  
86 specific regions at the species or subspecies level are available. Among these tests, the qPCR assay  
87 developed by Harper *et al.* (2010) has been identified as one of the most appropriate for the detection  
88 of *Xf*, as it has shown a high diagnostic sensitivity compared to others qPCR assays, detects all  
89 subspecies, has no cross-reactivity with any other bacterial species and has been successfully used on  
90 a wide range of plants (Modesti *et al.*, 2017; Reisenzein, 2017). Several tests have been proposed to  
91 identify one or more subspecies but no test is currently available to identify all subspecies. The  
92 subspecies identification is then routinely performed by MLST, but this method while accurate and  
93 portable is time consuming, labor intensive and expensive. From 2018, sequences of only two  
94 housekeeping genes (*rpoD* and *cysG* or *rpoD* and *malF*) are required for subspecies identification in  
95 France, while other sets of gene pairs are recommended by EPPO (EPPO, 2018b).

96 In recent years, multiplexed Taqman qPCR has become a useful tool for the identification and  
97 quantification of pathogens in different areas such as food safety (Köppel *et al.*, 2019; Wei *et al.*, 2019),  
98 medical environment (Janse *et al.*, 2013; Kamau *et al.*, 2013), agronomics (Wei *et al.*, 2008; Zitnick-  
99 Anderson *et al.*, 2018), GMO detection (Choi *et al.*, 2018; Wang *et al.*, 2018), and the environment  
100 (Hulley *et al.*, 2019). For plant pathogens these methods have been tested on samples of naturally  
101 infected plants, spiked samples (Li *et al.*, 2009; Willsey *et al.*, 2018), and on mixtures of plant and  
102 pathogen DNAs (Abraham *et al.*, 2018). *Xf*-specific multiplexed qPCR assays have already been  
103 developed based on the combination of primers designed by Harper *et al.* (2010) and Ouyang *et al.*  
104 (2013) (Bonants *et al.*, 2018). Other tests were proposed to differentiate *Xf* from phytoplasmas sharing  
105 common host plants (Ito and Suzaki, 2017) and to differentiate the subspecies *fastidiosa* from the  
106 subspecies *multiplex* (Burbank and Ortega, 2018). However, none of them allows the differential  
107 identification of all *Xf* subspecies.

108 In this study, we described the development and evaluation of six multiplex qPCR assays for the  
109 detection and identification of *Xf* subspecies. These tests have been designed and tested *in silico* on a  
110 wide range of target and non-target genomic sequences, *in vitro* on target and non-target bacterial  
111 strains, on *Xf*-spiked plant extracts, and finally *in planta* on samples from environmental or inoculated  
112 plants. These assays allowed the detection of *Xf* subspecies up to 10 pg.mL<sup>-1</sup> of DNA, 1x10<sup>3</sup> CFU.mL<sup>-1</sup>  
113 in spiked samples and allow the identification of *Xf* subspecies in environmental plant samples that  
114 cannot be typed using MLST. These multiplex qPCR assays offer a new, faster, more reliable, more  
115 specific, more sensitive, and less expensive tool than MLST.

## 116 2 Materials and methods

### 117 2.1 Bacterial strains and growth conditions

118 Collections of 39 strains representing the different *Xf* subspecies, 28 strains from other plant-  
119 pathogenic bacterium genera (*Agrobacterium*, *Clavibacter*, *Dickeya*, *Erwinia*, *Pantoea*, *Pseudomonas*,  
120 *Stenotrophomonas*, *Xanthomonas* and *Xylophilus*), and two strains from plant endosymbionts (*Ensifer*  
121 and *Rhizobium*) were used (Table 1). A set of 12 *Xf* strains of the subsp. *multiplex* and one strain of the  
122 subsp. *sandyi* were kindly provided by Leonardo De la Fuente (Auburn University, AL, USA). The  
123 other 57 strains were provided by the French Collection of Plant-Associated Bacteria (CIRM-CFBP;  
124 [https://www6.inra.fr/cirm\\_eng/CFBP-Plant-Associated-Bacteria](https://www6.inra.fr/cirm_eng/CFBP-Plant-Associated-Bacteria)). *Xf* strains were grown on BCYE  
125 (Wells *et al.*, 1981) or modified PWG media (agar 12 g.L<sup>-1</sup>; soytone 4 g.L<sup>-1</sup>; bacto tryptone 1 g.L<sup>-1</sup>  
126 <sup>1</sup>; MgSO<sub>4</sub>.7H<sub>2</sub>O 0,4 g.L<sup>-1</sup>; K<sub>2</sub>HPO<sub>4</sub> 1.2 g.L<sup>-1</sup>; KH<sub>2</sub>PO<sub>4</sub> 1 g.L<sup>-1</sup>; hemin chloride (0.1% in NaOH 0.05  
127 M) 10 ml.L<sup>-1</sup>; BSA (7.5%) 24 ml.L<sup>-1</sup>; L-glutamine 4 g.L<sup>-1</sup>) at 28°C for one to two weeks. Other strains  
128 were grown at 25°C for one to two days on: MG media (Mougel *et al.*, 2001) for *Agrobacterium* and  
129 *Rhizobium*, TSA (tryptone soy broth 30 g.L<sup>-1</sup>; agar 15 g.L<sup>-1</sup>) for *Clavibacter*, *Ensifer*,  
130 *Stenotrophomonas*, *Xanthomonas* and *Xylophilus* and King's B medium (KH<sub>2</sub>PO<sub>4</sub> 1.5 g.L<sup>-1</sup>; MgSO<sub>4</sub>,  
131 7H<sub>2</sub>O 1.5 g.L<sup>-1</sup>; protease peptone 20 g.L<sup>-1</sup>, glycerol 10 mL.L<sup>-1</sup>; agar 15 g.L<sup>-1</sup>) for *Dickeya*, *Erwinia*,  
132 *Pantoea* and *Pseudomonas*. For qPCR assays, bacterial suspensions were prepared from fresh cultures  
133 in sterile distilled water, adjusted at OD<sub>600 nm</sub> = 0.1. To evaluate assay specificity bacterial suspensions  
134 were boiled for 20 min, followed by a thermal shock on ice and a centrifugation at 10,000 g during 10  
135 min.

## 136 2.2 Plant material

137 Petioles or midribs were collected in 2018 from healthy plants of 13 species (*Helichrysum italicum*,  
138 *Lavandula angustifolia*, *Nerium oleander*, *Olea europaea*, *Prunus cerasus*, *Prunus dulcis*, *Quercus*  
139 *ilex*, *Quercus robur* and *Rosmarinus officinalis*) growing in orchards adjacent to INRA center or  
140 purchased in nurseries (*Vitis vinifera*, *Citrus clementina* and *Polygala myrtifolia*). These species are  
141 either not known to be host of *Xf* in France or were sampled in *Xf*-free areas. Symptomless *Cistus*  
142 *monspeliensis* plant material was collected in Corsica outside any recorded *Xf*-focus by the National  
143 Botanical Conservatory of Corsica (CNBC).

144 Plants were collected in June 2017 and in October 2018 in Corsica, France, based on symptoms and  
145 were pre-tested using a modified extraction procedure based on CTAB and/or QuickPick™ SML  
146 Plant DNA Kit (Bio-Nobile, Turku, Finland) as described in PM7/24 (EPPO, 2018b). Samples were  
147 first finely chopped and then sonicated (1 min, 42KHz) in a Branson apparatus. A 15 min incubation  
148 step at room temperature was performed before DNA extraction. The frozen DNA solutions of 20  
149 greenhouse inoculated plant materials were used to evaluate the multiplex qPCR assays.

## 150 2.3 Production of inoculated plants

151 *X. fastidiosa* strains CFBP 7970 (*Xff*), CFBP 8077 (*Xfs*), CFBP 8402 (*Xfp*), CFBP 8416 (*Xfm*) and  
152 CFBP 8418 (*Xfm*) were inoculated in six month-old grafted plants of *Vitis vinifera* cv Chardonnay,  
153 *Vitis vinifera* cv Cabernet Franc, in 1.5 years-old grafted plants of *Prunus armeniaca* var Bergeron,  
154 *Olea europaea* cv Aglandau, *Olea europaea* cv Capanaccia, and *Olea europaea* cv Sabine. Plants were  
155 grown in a confined growth chamber at 24°C with 16 h of daylight and at 20°C during night, under  
156 70% relative humidity. Plants were watered daily with water supplemented with 1.4 g.L<sup>-1</sup>  
157 nitrogen:phosphorus:potassium fertilizer (16:8:32). Plants were inoculated by the needle puncture  
158 method. A 10 µL drop of inoculum calibrated at OD<sub>600nm</sub> = 0.5 was placed on the node of a growing  
159 young stem and punctured with a needle. After six months for vines and apricot trees, and one year for  
160 olive trees, samples at the inoculation point were tested by the Harper's qPCR test and typed using the  
161 classical *Xf* MLST scheme as described in Denancé *et al.* (2017). The samples were stored at -20°C

162 before being analyzed. Plant inoculations were carried out under quarantine at IRHS, Centre INRA,  
163 Beaucouzé, France under the agreement no. 2013119-0002 from the Prefecture de la Région Pays de  
164 la Loire, France.

## 165 **2.4 Spiking of samples and DNA extraction**

166 Prior to DNA extraction, plant samples were inoculated by mixing 1 g of healthy plant material with  
167 0.5 mL of a bacterial suspension, at a known concentration, and ground with 4.5 mL of sterile distilled  
168 water. Each matrix was spiked in order to end up with concentrations ranging from  $1 \times 10^6$  CFU.mL<sup>-1</sup>  
169 to 10 CFU.mL<sup>-1</sup>. Spiking with more than one strain was done in equal amounts to end up with final  
170 concentrations ranging from  $1 \times 10^6$  CFU.mL<sup>-1</sup> to  $1 \times 10$  CFU.mL<sup>-1</sup>. Samples from *P. myrtifolia* were  
171 spiked with individual strains representing each subspecies of *Xf* (*Xff*: CFBP 7970, *Xfmo*: CFBP 8084,  
172 *Xfp*: CFBP 8402, *Xfm*: CFBP 8416). Other plant materials were spiked with the strain representing the  
173 only subspecies that infects them naturally. However, as several subspecies may co-occur in a same  
174 area and plant species may be hosts of several subspecies, samples of *N. oleander*, *O. europaea*,  
175 *P. dulcis*, and *P. myrtifolia* were also spiked with duos or trios of strains. A total of 29 plant species -  
176 *Xf* subspecies were combined. For negative controls, the samples were directly ground in sterile  
177 distilled water (5 mL). Samples were treated as above before DNA extraction. All DNA extractions  
178 were performed using the QuickPick™ SML Plant DNA Kit (Bio-Nobile, Turku, Finland) as in  
179 PM7/24 (EPPO, 2018b) with an automated system (Caliper Zephyr, PerkinElmer). A control composed  
180 of DNAs extracted from bacterial suspensions were systematically performed.

## 181 **2.5 Relationships between DNA concentration, OD<sub>600nm</sub> and bacterial concentration**

182 Fresh suspensions of CFBP 7970 strain calibrated at OD<sub>600 nm</sub> = 0.1 were plated on PWG medium and  
183 incubated at 28°C for 8 days before counting. They contained  $1 \times 10^8$  CFU.mL<sup>-1</sup>. Genomic DNA from  
184 the same suspensions was extracted using QuickPick™ SML Plant DNA Kit (Bio-Nobile, Turku,  
185 Finland) as described in PM7/24 (EPPO, 2018b). DNA concentration was measured using Qubit  
186 fluorimeter and serial dilutions of *Xf* genomic DNA at concentrations ranging from 1 µg.mL<sup>-1</sup> to 1  
187 pg.mL<sup>-1</sup> were prepared. The DNA was amplified using the Harper's *et al.* (2010) qPCR assay in a Bio-  
188 Rad CFX384 thermocycler. Results of the amplified serial dilutions were used to establish standard  
189 curves relating the amount of fluorescence to the amount of DNA. The bacterial concentration of the  
190 corresponding DNA solution was calculated based on DNA measures using an estimated genome size  
191 of 2,493,794 bp for the strain CFBP 7970 (Denancé *et al.*, 2017) and knowing that 1 pg =  $9.78 \times 10^8$  bp  
192 (Doležel *et al.*, 2003). Using the following equation curve ( $y = 2.10^{10 \exp(-0.567x)}$ , R<sup>2</sup> = 0.999) a  
193 Ct = 19.8 correlated to  $1.04 \times 10^8$  genome equivalent.mL<sup>-1</sup>.

## 194 **2.6 Gene target selection and primers design**

195 SkIf tool (Briand *et al.*, 2016) was used on 58 *Xylella* genomic sequences to target specific sequences  
196 of the *Xf* species, each subspecies, and the *fastidiosa sensu lato* (*Xffsl*) subspecies, i.e. the group  
197 including the *fastidiosa*, *morus* and *sandyi* subspecies (Denancé *et al.*, 2019) (Table 2). Six primer and  
198 probe combinations were designed using Primer3 2.3.4 (Koressaar and Remm, 2007), on these specific  
199 sequences to target the whole *Xf* species (XF primers), and the various subspecies : *fastidiosa* (XFF  
200 primers), *fastidiosa sensu lato* (XFFSL primers), *morus* (XMO primers), *multiplex* (XFM primers) and  
201 *pauca* (XFP primers) (Table 3). The parameters were set up with an optimal size of 20 bp (sizing  
202 between 18-27 bp), an optimal product size of 85 to 150 bp; a Tm of 60°C (± 3°C) and 70°C (± 3°C)  
203 for primers and probes, respectively. Then, the individual primer and probe combinations and the six  
204 sets of four combinations were tested using Amplify to check the absence of dimer and cross-

205 amplification (Engels, 1993). The specificity of all primers and probes was tested *in silico* using  
206 PrimerSearch (Val Curwen, Human Genome Mapping Project, Cambridge, UK) on the initial set of 58  
207 genomic sequences of *Xylella* and on the 154,478 bacterial Whole Genome Shotgun (WGS) sequences  
208 available in the NCBI database (as on August 22, 2018). BLASTn of the amplicons were run on the  
209 NCBI WGS database to evidence their specificity.

210 Four others primer and probe combinations previously published were used in this study. The first  
211 targets the *rimM* gene of *Xf* (Harper *et al.*, 2010) and was used as reference protocol. The second targets  
212 the eukaryotic *rRNA18S* gene (Ioos *et al.*, 2012) and was used as internal control. The remaining two  
213 tests target *fastidiosa* or *multiplex* subspecies (Burbank and Ortega, 2018).

## 214 **2.7 Optimization of qPCR assays and tetraplexing**

215 The tetraplex qPCR assays designed in this study were optimized for: i) primer and probe hybridization  
216 temperature that was checked individually by PCR using a gradient ranging from 57.5 to 61.4°C in  
217 intervals of 0.8°C (CFX96 Touch™ Bio-Rad), ii) concentrations of 250 nM, 575 nM or 900 nM for  
218 primers combined with 150 nM, 200 nM or 250 nM for probes according to PCR mix manufacturer  
219 instructions, and iii) addition of 600 ng.µl<sup>-1</sup> of BSA. All the optimization analyses were performed in  
220 triplicates using SsoAdvanced™ Universal Probes Supermix (Bio-Rad) and performed in a Bio-Rad  
221 CFX thermocycler using the “all channels” reading mode. To allow simultaneous detection of *Xf* and  
222 identification at the subspecies level, primer and probe combinations were then declined in six different  
223 triplex and tetraplex qPCR sets, *i.e.* set n°1: XF-XFFSL-XFM-XFP, set n°2: XF-XFF-XFM-XFP, set  
224 n°3: XF-XFF-XFM-XMO, set n°4: XFFSL-XFM-XFP, set n°5: Harper-XFFSL-XFM-XFP and set  
225 n°6: 18S-XFFSL-XFM-XFP.

226 The optimized final reaction conditions were performed in a final volume of 10 µL containing 1X of  
227 SsoAdvanced™ Universal Probes Supermix (Bio-Rad), 575 nM of primers, 200 nM of probes and 600  
228 ng.µl<sup>-1</sup> of BSA (ThermoFisher) and 1 µL of extracted DNA. The optimal thermocycling conditions  
229 selected were: 3 min at 95°C, followed by 40 cycles of 15 s at 95°C and 30 s at 60°C. The qPCR assays  
230 results were analyzed, with expert verification, using Bio-Rad CFX Manager 3.1 software and its  
231 regression mode. The reaction efficiency was calculated using serial dilutions with the formula:  $E =$   
232  $10^{(-1/\text{slope})}$ .

## 233 **2.8 qPCR assay specificity, efficiency and limit of detection**

234 The specificity of the newly designed primer and probe combinations was validated using the  
235 optimized protocol on the boiled bacterial suspensions of the 69 strains listed in the Table 1. The  
236 efficiency of each combination was evaluated on bacterial DNA solutions ranging from 1 µg.mL<sup>-1</sup> to  
237 1 pg.mL<sup>-1</sup>, in simplex or tetraplex assays (set n°1 to 3), on the strains CFBP 7970 (*Xff*) for the primers  
238 XF, XFF and XFFSL, CFBP 8416 (*Xfm*) for the primers XF and XFM, CFBP 8084 (*Xfmo*) for the  
239 primers XF and XFMO, and CFBP 8402 (*Xfp*) for the primers XF and XFP. In addition, each set was  
240 also evaluated with spiked plant material. All analyses were performed in triplicate. Two independent  
241 experiments were carried out on *O. europaea*, *P. myrtifolia*, *P. cerasus*, *P. dulcis* *Q. ilex* and *V. vinifera*  
242 using the set n°1: XF – XFFSL – XFM – XFP, leading to the analysis of 46 combinations of  
243 plant/strain(s) for this set. The assays were also performed on environmental plant samples and  
244 inoculated plant samples. For plant samples, the lowest concentration with a positive result in at least  
245 two out of the three replicates was considered the limit of detection (LOD).

246 The LOD of the tetraplex qPCR assays sets n°1 to 3 was compared to the Harper's qPCR detection test  
247 (Harper *et al.*, 2010) using the TaqMan™ Universal PCR Master Mix (Applied Biosystems) as in  
248 PM7/24 (EPPO, 2018b). The LOD of the tetraplex qPCR assay set n°1 was compared to the ones of  
249 sets n°4, 5 and 6. The specificity of the qPCR assay recently proposed by Burbank and Ortega (2018)  
250 was also evaluated on the *Xf* strain collection using the SsoAdvanced™ Universal Probes Supermix  
251 (Bio-Rad) master mix.

## 252 **3 Results**

### 253 **3.1 Design of primers and probes and *in silico* analysis**

254 Species-specific and subspecies-specific long-mers were identified with SkIf (Briand *et al.*, 2016;  
255 Denancé *et al.*, 2019) on genomic sequences. For the *Xf* species and the subspecies *fastidiosa*, *morus*,  
256 *multiplex*, and *pauca*, one of the two longest long-mers identified by Denancé *et al* (2019) was selected  
257 for this study (Table 2). For the subspecies *fastidiosa sl* specific long-mers were searched for on our  
258 58 genome sequences of *Xf*, using the subspecies *fastidiosa*, *morus* and *sandyi* genomes as ingroups  
259 and the *multiplex* and *pauca* genomes as outgroups. In total, 3,345 long-mers were identified, ranging  
260 from 22 bp to 235 bp (Supplemental data 1).

261 Primers and probes were designed within specific long-mers (Table 3). Specific amplifications were  
262 obtained *in silico* on XF genome sequences and WGS bacterial sequences from NCBI at the expected  
263 amplification size, without any mismatch for the five primer and probe combinations (XFF, XFFSL,  
264 XFM, XFMO and XFP). Only two mismatches were observed and concerned the XF primer and probe  
265 combination. One mismatch was on the eighth nucleotide on the XF probe for the *Xfm* Dixon, Griffin1,  
266 M12, Sycamore, CFBP 8416, CFBP 8417, CFBP 8418 strains and the second one was on the sixth  
267 nucleotide of the forward XF primer of the Ann-1 *Xfs* strain. As there were not many possible  
268 combinations of primers and probes for the XF set, this combination was nevertheless retained, and  
269 subsequent *in silico* checks proved the specificity of all primer and probe combinations.

### 270 **3.2 Specificity and sensitivity of simplex and tetraplex qPCR assays on strains**

271 The specificity of each newly designed primer and probe combination was validated in simplex qPCR  
272 assays on 39 *Xf* strains and on 30 plant associated-bacterial strains (Table 1). These strains were  
273 selected as they potentially share the same niche than *Xf* or for being phylogenetically closely related.  
274 No amplification was detected on non-target strains or healthy host plant species and the primer and  
275 probe combinations allowed amplification of all strains or subspecies of *Xf*, for which they were  
276 designed (XF: 39/39, XFF: 10/10, XFM: 16/16, XFMO: 1/1, XFP: 7/7, XFFSL: 16/16).

277 In simplex qPCR assays, the LODs of the new primer and probe combinations designed in this study  
278 were as good as the LODs obtained with the Harper's qPCR assay or 10 times better for XFM primers  
279 (Table 4). The efficiency of each combination was evaluated on serial dilutions of calibrated DNA  
280 solutions. The XF, XFM, XFMO, XFP, and XFFSL primers and probes allowed detection of *Xf* up to  
281 10 pg.mL<sup>-1</sup> (4 copies/reaction). XFF primers were slightly less sensitive with a threshold up to 100  
282 pg.mL<sup>-1</sup> (40 copies/reaction). On the same DNA solutions, Harper *et al.* (2010) qPCR assay allowed  
283 the detection of strains CFBP 8402 (*Xfp*) and CFBP 8084 (*Xfmo*) up to 10 pg.mL<sup>-1</sup>, and CFBP 7970  
284 (*Xff*) and CFBP 8416 (*Xfm*) strain up to 100 pg.mL<sup>-1</sup>. This makes our new primer qPCR assays good  
285 alternatives to Harper's qPCR assay.

286 The three tetraplex qPCR assays (set n°1: XF – XFFSL – XFM – XFP, set n°2: XF – XFF – XFM –  
287 XFP and set n°3: XF – XFF – XFM – XFMO) allowed both detection and identification of *Xf* and its  
288 subspecies (Supplemental data 2). On calibrated DNA solutions these assays were as good as Harper's  
289 test or had a LOD 10 times higher depending of the tetraplex assays. When used in tetraplex the Ct  
290 values obtained were always lower than the Ct values obtained with Harper's test. Except for *morus*  
291 primers (XFMO) the LOD of tetraplex qPCR assays was usually 10 times higher than the LOD of the  
292 simplex test on DNA (Table 4 and Supplemental data 2). In addition, it should be noted that the closer  
293 the Ct value was to the detection limit, the higher the SEM was. In tetraplex qPCR assays set n°1, XF,  
294 XFM and XFP primers allowed a detection up to 100 pg.mL<sup>-1</sup>. The XFFSL primers allowed the  
295 detection of *Xff* up to 10 pg.mL<sup>-1</sup> and of *Xfmo* up to 100 pg.mL<sup>-1</sup>. The set n°2 allowed detection up to  
296 100 pg.mL<sup>-1</sup> using XFF and XFM primers and up to 10 pg.mL<sup>-1</sup> with XFP primers. The XF primers  
297 allowed the detection of *Xff* and *Xfm* up to 100 pg.mL<sup>-1</sup> and of *Xfp* up to 10 pg.mL<sup>-1</sup>. The set n°3,  
298 allowed a detection up to 100 pg.mL<sup>-1</sup> with XF, XFF and XFM primers and up to 10 pg.mL<sup>-1</sup> with  
299 XFMO primers.

300 A triplex qPCR assay for the simultaneous detection of subspecies *fastidiosa* and *multiplex* has recently  
301 been published (Burbank and Ortega, 2018). In order to analyze the potential of their targets and  
302 potentially introduce them into our sets to improve *Xf* detection, we tested their specificity *in silico* and  
303 *in vitro* on selected bacterial strains. According to BLASTn searches, *Xff* primers potentially amplified  
304 two of the three strains of the subsp. *sandyi* (CFBP 8073: ST75 and Co33: ST72) without mismatches  
305 and seven strains of the subsp. *pauca* (CoDiRo, COF0407, De Donno, OLS0478, OLS0479, Salento-  
306 1 and Salento-2) with one and two mismatches on the forward and reverse primers, respectively  
307 (Supplemental data 3). *In silico*, *Xfm* primers potentially amplified eight strains of subsp. *pauca*  
308 (CFBP 8072, CoDiRo, COF0407, De Donno, OLS0478, OLS0479, Salento-1, Salento-2) with three  
309 mismatches on the forward primer, two mismatches on the reverse primer and one mismatch on the  
310 probe, and amplicons had the expected size. We double checked the specificity of these two sets *in*  
311 *vitro* on bacterial suspensions (Supplemental data 4). *Xff* primers amplified the three tested strains of  
312 subsp. *sandyi* (CFBP 8356, CFBP 8419 and CFBP 8077) and six of the seven tested strains of subsp.  
313 *pauca* (CFBP 8074, CFBP 8402, CFBP 8429, CFBP 8477, CFBP 8495 and CFBP 8498). The  
314 sequencing of all amplicons confirmed the results of the qPCR assays. *Xfm* primers amplified five of  
315 the seven tested strains of *Xf* subsp. *pauca* (CFBP 8072, CFBP 8074, CFBP 8402, CFBP 8495 and  
316 CFBP 8498). Burbank and Ortega (2018) used a cut off at Ct=35 for categorizing a result as positive.  
317 In that case only two *pauca* strains (CFBP 8072 and CFBP 8495) would have been identified as *Xfm*,  
318 the others having values ranging between 35.33 and 35.83. For *Xfm*, due to the high Ct values, no  
319 sequencing was feasible to confirm the identification.

### 320 **3.3 Identification of *Xf* subspecies in spiked samples with tetraplex qPCR assays**

321 After validation of the efficiency and specificity of the primers and probe, the three sets of tetraplex  
322 qPCR assays n°1, 2 and 3, were tested on spiked samples. As the three sets gave similar results, this  
323 section is focused on the tetraplex set n°1: XF – XFFSL – XFM – XFP, which covers the full known  
324 diversity of *Xf* (Table 5). The results of the other two tetraplex assays are provided in Supplemental  
325 Data 5 and Supplemental data 6. This tetraplex qPCR assay (set n°1) was tested on 29 combinations of  
326 plant petioles and midribs spiked with one to three strains of the different subspecies. (The full results  
327 of the dilution ranges are available in Supplemental data 7). This tetraplex allowed the detection and  
328 correct identification of all subspecies in all combinations without false positive result. Although the  
329 detection limit was expected to be similar for all plants, since they were all enriched with the same  
330 bacterial suspensions, different LODs were observed ranging from 1x10<sup>3</sup> to 1x10<sup>5</sup> CFU.mL<sup>-1</sup> (5 to



331  $5 \times 10^3$  CFU/reaction) depending on the matrix for plants spiked with only one strain. An independent  
332 repetition of this test was performed two months after the first one. For *O. europaea*, *P. myrtifolia*, *P.*  
333 *cerasus*, *P. dulcis* and *Q. ilex* the LOD was either identical between the two assays or 10 times higher.  
334 The LOD of *Xf* in *V. vinifera* was 100 times higher in the second assay highlighting a potential  
335 accumulation of qPCR inhibitors between the two experiments. Moreover, on 11 combinations out of  
336 46, XF primers had a LOD 10 times higher *in planta* than the one obtained for the subspecies. *Xf*  
337 subspecies could be identified until a Ct value of 35.08 using Harper's qPCR assay in a spiked sample  
338 of *P. dulcis*. In other matrices the LOD of the tetraplex qPCR assay corresponded usually to a Ct value  
339 ranging from 30 to 34 using Harper's qPCR.

340 Moreover, the tetraplex qPCR assay set n°1 allowed the detection and identification of mix infections  
341 with two to three subspecies simultaneously. On *N. oleander*, *O. europaea*, *P. myrtifolia* and *P. dulcis*  
342 the LOD for the two or three inoculated subspecies is similar of the one obtained for single inoculations  
343 (Table 5).

344 To demonstrate that our multiplex qPCR assays are modular tools, which can be adapted to one's needs,  
345 three other primer and probe sets were evaluated. In one set, we removed the primers and probe  
346 targeting the species (set n°4: XFFSL-XFM-XFP). In a second one, we replaced it by the Harper's  
347 primers and probe as this test is known to be highly sensitive (set n°5: Harper-XFFSL-XFM-XFP), and  
348 we also tested the use of primers and probes targeting the 18S rRNA as an internal control (set n°6:  
349 18S-XFFSL-XFM-XFP). Evaluation of these three sets on calibrated DNA suspensions of the *Xff* strain  
350 CFBP 7970 indicated that the LOD for the XFFSL primers was the same than the one found previously  
351 for the sets n°1, 4, 5 and 6 ( $10 \text{ pg.mL}^{-1}$ ) (Supplemental data 8). In *Q. robur* and *C. monspeliensis*  
352 samples spiked with the *Xfm* strain CFBP 8416, the LOD obtained for the primers detecting the  
353 multiplex subspecies (XFM) was the same for the three sets ( $1 \times 10^5 \text{ CFU.mL}^{-1}$ ) (Supplemental data 9).  
354 The use of Harper's primers and probe in set n°5 allowed the detection of *Xf* strain at the same LOD  
355 than for XF primers and probe in spiked *Q. robur* samples, but the detection was slightly better (a gain  
356 of one Log unit) in the spiked *C. monspeliensis* samples. A Ct value was obtained for all spiked samples  
357 with the 18s rRNA primers, highlighting that these primers and probe were reliable internal  
358 amplification controls.

### 359 **3.4 Identification of *Xf* subspecies in environmental plant samples and inoculated** 360 **plants by tetraplex qPCR assays**

361 Ten plant samples from Corsica, France (Table 6) and ten samples from inoculated plants (Table 7)  
362 were tested using the tetraplex set n°1. Our tetraplex qPCR assay was able to detect the bacterium in  
363 samples declared contaminated with Harper's qPCR assay up to Ct =34.97. However, this LOD was  
364 variable depending on the matrices (Table 7). While the bacterium was detected at the subspecies level  
365 with one or the other primer and probe combinations in eight environmental plant samples, the XF  
366 primers and probe was less efficient and allowed the detection in only five samples (Table 6) indicating  
367 that primer and probe combinations designed for subspecies were more sensitive than the one designed  
368 to detect the species. The subspecies was hence identified in samples that were not successfully typed  
369 using the MLST protocol. Samples of *Centranthus trinervis*, *Olea europaea* and *Phylirea angustifolia*  
370 (n° 1, 6 and 7) were infected by a *Xffsl* strain and samples of *Helichrysum italicum*, *Lavandula stoechas*,  
371 *Polygala myrtifolia*, and *Spartium junceum* (n°2, 3, 8, 9 and 10) were detected infected by a *multiplex*  
372 strain. The partial MLST subspecies identification of the sample n°8 was hence validated. The assay  
373 also identified the subspecies in the ten samples obtained from inoculated plants and confirmed the  
374 identity of the inoculated strain.

## 375 4 Discussion

376 Since its first detection in Europe in 2013, *Xf* has been reported in various EU member states and on a  
377 wide host range ([https://ec.europa.eu/food/sites/food/files/plant/docs/ph\\_biosec\\_legis\\_emergency\\_db-](https://ec.europa.eu/food/sites/food/files/plant/docs/ph_biosec_legis_emergency_db-host-plants_update12.pdf)  
378 [host-plants\\_update12.pdf](https://ec.europa.eu/food/sites/food/files/plant/docs/ph_biosec_legis_emergency_db-host-plants_update12.pdf)). It is hence considered as an emergent plant bacterium in Europe and it is  
379 regulated in the EU as a quarantine organism under Council Directive 2000/29/EC. Control measures  
380 to prevent the spread of this pathogen within the EU are limited to eradication and containment  
381 measures (EFSA, 2018b). Application of these outbreak management strategies require the  
382 identification of *Xf* strains at the subspecies level. Indeed, the list of host plants is provided per *Xf*  
383 subspecies with only a limited number of plants (currently 15) being hosts of all subspecies currently  
384 detected in the EU. Identifying *Xf* at the subspecies level is thus highly important to limit the number  
385 of host plants to be eradicated once an outbreak is detected.

386 In this context, on the basis of a large dataset of in-house and publicly available genome sequences of  
387 *Xf* and *SkIf*, a powerful bioinformatics-tool (Briand *et al.*, 2016; Denancé *et al.*, 2019), we identified  
388 species and subspecies signatures. These long-mers were used as targets to designed primer and probe  
389 combinations with different levels of specificity. These combinations target single-copy genes  
390 encoding proteins involved in bacterial metabolism. This is the case for the XF primers and probe  
391 targeting a gene encoding a ketol-acid reductoisomerase, an enzyme essential in the biosynthesis  
392 pathway of the L-isoleucine and L-valine; XFF primers and probe target a gene encoding a restriction  
393 modification system DNA specificity, involved in defense against foreign DNA (Wilson and Murray,  
394 1991); XFM primers and probe target a gene coding a DNA methyltransferase; XFMO primers and  
395 probe target a gene coding an S24 peptidase involved in a stress-response against DNA lesions and  
396 leading to the repair of single-stranded DNA (Erill *et al.*, 2007); XFP primers and probe target a gene  
397 coding a histidine kinase and an ABC transporter substrate, two membrane proteins involved in signal  
398 transduction across the cellular membrane (Tanaka *et al.*, 2018; Yoshida *et al.*, 2007).

399 Tested on a large collection of target and non-target strains, the primers and probes showed high  
400 specificity for *Xf* and its subspecies and no cross-reactions. *In vitro*, the specificity was tested in two  
401 steps. Inclusivity was evaluated on strains of *Xf* subspecies and exclusivity on a range of strains chosen  
402 to be present in the same plant and insect niches as *Xf* (Rogers, 2016) or to be genetically closely related  
403 to it. With the exception of a few studies (Boureau *et al.*, 2013; Hulley *et al.*, 2019) only one to ten  
404 non-target strains are selected to test the specificity of novel molecular detection tools (Burbank and  
405 Ortega, 2018; Francis *et al.*, 2006; Harper *et al.*, 2010). Here a larger collection including 30 non-target  
406 strains and 39 *Xf* strains was analyzed to ensure the specificity of the primer and probe combinations  
407 based on the advice of the PM 7/98 of the EPPO (2014) and the MIQE of Bustin *et al.* (2009).

408 At the moment there is only few methods allowing the simultaneous detection and identification of  
409 different subspecies of *Xf* and none of them is specific. The conventional PCR test of Hernandez-  
410 Martinez *et al.* (2006) was designed to differentiate the subspecies *multiplex*, *fastidiosa* and *sandyi*.  
411 Nevertheless, the analysis of more than 300 samples collected in France and infected with subsp.  
412 *multiplex* revealed the amplification of additional bands leading to unclear patterns (Denancé *et al.*,  
413 2017). A triplex qPCR assay was recently developed to identify *Xff* and *Xfm* and was tested on  
414 grapevine, almond and insects (Burbank and Ortega, 2018). Compared to this assay, our tetraplex  
415 qPCR assays gave similar results for the analysis of spiked almond and grapevine samples. However,  
416 we did not detect any cross reaction with our primers and probes, while the test proposed by Burbank  
417 and Ortega in 2018 could lead to cross-reactions with strains from the subspecies *pauca* and *sandyi*.  
418 While *pauca* strains have not been so far detected in grapevine samples in any outbreaks, it was

419 demonstrated that grapevine is susceptible to *pauca* strains (Li et al., 2013) and caution should be taken  
420 not to misidentify *Xf* strains infecting grapevine.

421 Primers and probes optimized for qPCR tetraplex assays allowed simultaneously the detection of *Xf*  
422 and its identification at the subspecies level, providing two complementary results as the targets of the  
423 tests are different. The use of one of these tetraplex assays hence corresponds to the first requirement  
424 for *Xf* detection as reported in PM 7/98 (EPPO, 2014). So far, subspecies identification is done by  
425 sequencing two to seven housekeeping genes (EPPO, 2018b; Yuan *et al.*, 2010). If one of the gene  
426 amplifications fails, or if sequencing is not feasible (in case of a too low amount of DNA) then the  
427 subspecies cannot be assigned. The average value of the LOD for every gene in the *Xf* MLST scheme  
428 is at the best at  $10^5$  CFU.mL<sup>-1</sup> (Cesbron *et al.*, in prep). As demonstrated with single strain suspensions  
429 and mix-suspensions these assays display high efficiency (i.e. low LOD), even if, as Ito and Suzaki  
430 (2017) have shown, multiplexing increases the LOD by up to one log unit. With a LOD of 10 to 100  
431 pg.mL<sup>-1</sup> (i.e.  $4 \times 10^3$  to  $4 \times 10^4$  copies.mL<sup>-1</sup>), these multiplex qPCR assays still present a sensitivity that  
432 is similar to the one of the reference protocol, on single bacterial suspensions (Harper *et al.*, 2010).

433 In spiked and environmental plant samples, the benefit from the use of our tetraplex assays is obvious.  
434 The tetraplex qPCR assays developed here are able to identify *Xf* subspecies up to  $10^3$  CFU.mL<sup>-1</sup> in  
435 spiked samples. They allowed the identification of the *Xf* subspecies in environmental plant samples,  
436 as well, leading to subspecies identification when MLST failed and confirmed partial MLST  
437 identification. Subspecies was identified in samples detected infected but with high Ct values  
438 (determined at 35 with the Harper's qPCR assay), which corresponds to a bacterial load of only  $10^3$   
439 CFU.mL<sup>-1</sup>. It should be mentioned here, that to increase the chance of detecting *Xf* in low contaminated  
440 samples, a sonication step has been added before DNA extraction. Indeed, it has been known for a  
441 while that sonication allows bacterial recovery from plant samples (Morris *et al.*, 1998) and this was  
442 recently demonstrated to improve *Xf* isolation from plant samples (Bergsma-Vlami *et al.*, 2017). We  
443 hypothesize that a sonication step while disrupting biofilm, will allow a better cell lysis through a better  
444 access of chemicals to the cells. Although analysis of more samples is necessary to confirm this LOD,  
445 the tetraplex qPCR assays allow the identification of *Xf* subspecies in samples for which it was not  
446 possible with the current MLST scheme, even considering only two genes.

447 In spiked plant samples the LOD of our tetraplex qPCR assays were 10 to 100 times higher than in  
448 bacterial suspensions. This could be linked to the presence of plant metabolites, mostly polyphenols,  
449 polysaccharides but also pectin or xylan, that act as inhibitors of the polymerase. To avoid such a  
450 problem, we already included BSA in the PCR reaction mix to chelate polyphenols (Harper *et al.*, 2010;  
451 Wei *et al.*, 2008). Moreover, we used polymerases that are known to be less susceptible to inhibitors  
452 than regular ones. The TaqMan™ Universal PCR Master Mix (used in the qPCR Harper's test) contains  
453 an AmpliTaq Gold DNA polymerase, and the SsoAdvanced™ Universal Probes Supermix (Bio-Rad)  
454 (used in our tetraplex qPCR assays) contains a Sso7d fusion polymerase. Both Taq polymerases were  
455 highlighted to have good amplification performance in comparison to nine other Taq polymerases  
456 (Witte *et al.*, 2018). The Sso7d fusion polymerase was optimized for multiplex qPCR and to amplify  
457 samples rich in inhibitors such as polysaccharides, cellulose or pectin. Grapevine and olive tree are  
458 known to be rich in polyphenols (Ortega-Garcia *et al.*, 2008; Schneider *et al.*, 2008). These compounds  
459 are accumulated in the plant during stress or fruit ripening (Ennajeh *et al.*, 2009; Ortega-Garcia *et al.*,  
460 2008). These variations could explain the 10 to 100 fold higher LOD obtain for the second repetition  
461 that was performed with grapevine and olive tree sampled two months after the first sample set.

462 While we added a sonication step to improve DNA extraction, we did not test here other ways to  
463 improve *per se* the DNA extraction step and improve the LOD of our assays. Various options are  
464 available. A phenol-chloroform step could be added to the DNA extraction method to reduce the level  
465 of extracted proteins (Schrader *et al.*, 2012). Reagents such as Tween 20, DMSO, polyethylene glycol  
466 or active carbon could be used to precipitate the polysaccharides before DNA precipitation (Schrader  
467 *et al.*, 2012). Phenol levels may be reduced with the use of polyvinyl-pyrrolidone or the addition of  
468 borate (Wilkins and Smart, 1996). Drying plant samples at 65°C for 2 days, prior to DNA extraction,  
469 could also help to cancel out the effect of phenolic inhibitors (Sipahioglu *et al.*, 2006).

470 One of the great advantages of the multiplex qPCR assays we developed is that they are modular and  
471 reliable. Combinations of primers and probe can be adapted to include sets aiming at detecting  
472 infections at the species and/or only at the subspecies level, and having internal controls for each  
473 reaction. We showed here as proofs of concept, that replacing our XF primers and probe with the ones  
474 from Harper's test is feasible and leads to highly susceptible test, as using 18S rRNA primers and probe  
475 as internal control is efficient.

476 In addition, unlike with identification relying on MLST scheme, the qPCR tetraplex assays allow the  
477 simultaneous identification of several subspecies in one sample, as demonstrated with spiked samples.  
478 In fact, mix infections with two subspecies of *Xf* have already been observed in naturally infected plants  
479 (Bergsma-Vlami *et al.*, 2017; Chen *et al.*, 2005; Denancé *et al.*, 2017). This leads to the observation of  
480 multiple peaks on the sequencing sequence of a housekeeping gene and is complex to analyze and  
481 differentiate from a sequencing error (Denancé *et al.*, 2017). The simultaneous detection and  
482 identification of multiple subspecies brings the tetraplex qPCR assays powerful tools to easily and  
483 quickly detect mixed infection or to study *Xf* in areas such as Europe where several subspecies live in  
484 sympatry (Denancé *et al.*, 2017).

485 When a new assay is developed, the time and cost difference with current protocols must be taken into  
486 account. The tetraplex qPCR assays are much faster and cheaper than using a test for detection and  
487 then a reduced MLST scheme for subspecies assignment. The current protocol costs are for Harper's  
488 qPCR detection at the writing time ~0.52€ for reagents, (for a volume of 10 µL) ~1.62€ for the  
489 amplification of two housekeeping genes (~0.81€/gene for a volume of 20 µL) and ~10.2€ for their  
490 sequencing (~5.1€/gene in both directions), hence totalizing ~12.35€ per sample. In comparison a  
491 single tetraplex qPCR assay costs ~0.37€ per sample (for a volume of 10 µL). None of these costs  
492 includes the cost of plastic materials or specialized equipment such as a qPCR thermocycler.

493 To conclude, we developed specific, effective, fast, cost-efficient and easy to set up tools allowing in  
494 one step to detect and identify at the subspecies level *Xf* infection directly in plant samples. Compared  
495 to current protocols, the LOD of our tetraplex assays allowed subspecies identification at levels where  
496 regular amplifications such as the one used for MLST failed. Tetraplex qPCR assays are also easily to  
497 perform in a routine lab and as such should be easily transferable to laboratories and are modular  
498 according to the user's needs.

## 499 **5 Nomenclature**

500 BLAST: Basic Local Alignment Search Tool

501 CNBC: National Botanical Conservatory of Corsica

502 INRA: French National Institute for Agricultural Research

503 IRHS: Research Institute of Horticulture and Seeds

504 LAMP: Loop-Mediated Isothermal Amplification

505 MIQE: Minimum Information for the Publication of Quantitative Real-Time PCR Experiments

506 MLST: Multi-Locus Sequence Typing

507 NCBI: National Center for Biotechnology Information

508 ST: Sequence Type

509 *Xf*: *Xylella fastidiosa*

510 *Xff*: *Xylella fastidiosa* subsp. *fastidiosa*

511 *Xffsl*: *Xylella fastidiosa* subsp. *fastidiosa* sensu lato

512 *Xfm*: *Xylella fastidiosa* subsp. *multiplex*

513 *Xfmo*: *Xylella fastidiosa* subsp. *morus*

514 *Xfp*: *Xylella fastidiosa* subsp. *pauca*

515 *Xfs*: *Xylella fastidiosa* subsp. *sandyi*

516 WGS: Whole Genome Shotgun

## 517 **6 Acknowledgments**

518 We thank Muriel Bahut (ANAN technical facility, SFR QUASAV, Angers, FR) for DNA extraction  
519 automatization, CIRM-CFBP (Beaucouzé, INRA, France; [http://www6.inra.fr/cirm\\_eng/CFBP-Plant-](http://www6.inra.fr/cirm_eng/CFBP-Plant-Associated-Bacteria)  
520 [Associated-Bacteria](http://www6.inra.fr/cirm_eng/CFBP-Plant-Associated-Bacteria)) for strain preservation and supply, Leonardo de la Fuente (Auburn University,  
521 AL, USA) and LSV-ANSES for sharing strains, and colleagues from CNBC for sampling plants in  
522 Corsica, France. We acknowledge Nicolas Denancé for preliminary experiments to design specific  
523 PCR tests. We thank Charles Manceau (Anses, Angers, FR) for his contribution while applying for  
524 funding, Armelle Darrasse and Matthieu Barret for fruitful discussions and critical reading of the  
525 manuscript.

## 526 **7 Author Contributions**

527 ED performed the experiments, ED and SC conducted the study, MB designed the bioinformatics tool,  
528 ED, MB, MAJ and SC designed the *in silico* analysis, and interpreted the data, MAJ conceived the  
529 study, and applied for funding, ED, MAJ and SC wrote the manuscript. All authors read and approved  
530 the final version of the manuscript.

## 531 **8 Conflict of Interest**

532 The authors declare that the research was conducted in the absence of any commercial or financial  
533 relationships that could be construed as a potential conflict of interest. The present work reflects only  
534 the authors' view and no analysis has been made in the French Reference Lab; in particular ED is not  
535 authorized to perform any official tests at Anses.

## 536 **9 Funding**

537 ED salary was funded by INRA SPE division and Anses. This work received support from the  
538 European Union's Horizon 2020 research and innovation program under grant agreement 727987  
539 XF\_ACTORS (Xylella Fastidiosa Active Containment Through a multidisciplinary-Oriented  
540 Research Strategy). The present work reflects only the authors' view and the EU funding agency is  
541 not responsible for any use that may be made of the information it contains.

## 542 **10 References**

- 543 Abraham, N. D., Chitrampal, P., Keriö, S., and LeBoldus, J. M. (2018). Multiplex qPCR for detection  
544 and quantification of *Sphaerulina musiva* in *Populus* stems. *Plant Pathology* 67, 1874–1882.  
545 doi:10.1111/ppa.12913.
- 546 Bergsma-Vlami, M., van de Bilt, J. L. J., Tjou-Tam-Sin, N. N. A., Helderma, C. M., Gorkink-Smits,  
547 P. P. M. A., Landman, N. M., et al. (2017). Assessment of the genetic diversity of *Xylella*  
548 *fastidiosa* in imported ornamental *Coffea arabica* plants. *Plant Pathol* 66, 1065–1074.  
549 doi:10.1111/ppa.12696.
- 550 Bonants, P., Griekspoor, Y., Houwers, I., Krijger, M., Zouwen van der, P., van der Lee, T., et al. (2018).  
551 The development and evaluation of a triplex TaqMan assay and Next Generation Sequence  
552 Analysis for improved detection of *Xylella* in plant material. *Plant Disease*. doi:10.1094/PDIS-  
553 08-18-1433-RE.
- 554 Boureau, T., Kerkoud, M., Chhel, F., Hunault, G., Darrasse, A., Brin, C., et al. (2013). A multiplex-  
555 PCR assay for identification of the quarantine plant pathogen *Xanthomonas axonopodis* pv.  
556 *phaseoli*. *Journal of Microbiological Methods* 92, 42–50. doi:10.1016/j.mimet.2012.10.012.
- 557 Briand, M., Gaborieau, R., Jacques, M.-A., Barret, M., Boureau, T., Gaillard, S., et al. (2016). SkIf: a  
558 tool for rapid identification of genes or regulators of interest. *F1000Research* 5.  
559 doi:10.7490/f1000research.1112490.1.
- 560 Burbank, L. P., and Ortega, B. C. (2018). Novel amplification targets for rapid detection and  
561 differentiation of *Xylella fastidiosa* subspecies *fastidiosa* and multiplex in plant and insect  
562 tissues. *Journal of Microbiological Methods* 155, 8–18. doi:10.1016/j.mimet.2018.11.002.
- 563 Bustin, S. A., Benes, V., Garson, J. A., Hellemans, J., Huggett, J., Kubista, M., et al. (2009). The MIQE  
564 Guidelines: Minimum Information for Publication of Quantitative Real-Time PCR  
565 Experiments. *Clinical Chemistry* 55, 611–622. doi:10.1373/clinchem.2008.112797.
- 566 C/2017/4883 (2017). Commission Implementing Directive (EU) 2017/1279 of 14 July 2017 amending  
567 Annexes I to V to Council Directive 2000/29/EC on protective measures against the  
568 introduction into the Community of organisms harmful to plants or plant products and against

- 569 their spread within the Community. Available at:  
570 [http://data.europa.eu/eli/dir\\_impl/2017/1279/oj/fra](http://data.europa.eu/eli/dir_impl/2017/1279/oj/fra) [Accessed November 20, 2018].
- 571 Chen, J., Groves, R., Civerolo, E. L., Viveros, M., Freeman, M., and Zheng, Y. (2005). Two *Xylella*  
572 *fastidiosa* Genotypes Associated with Almond Leaf Scorch Disease on the Same Location in  
573 California. *Phytopathology* 95, 708–714. doi:10.1094/PHYTO-95-0708.
- 574 Choi, W., Seol, M.-A., Jo, B.-H., Kim, I. R., and Lee, J. R. (2018). Development and application of a  
575 novel multiplex PCR method for four living modified soybeans. *Appl Biol Chem* 61, 635–641.  
576 doi:10.1007/s13765-018-0399-8.
- 577 Cruaud, A., Gonzalez, A.-A., Godefroid, M., Nidelet, S., Streito, J.-C., Thuillier, J.-M., et al. (2018).  
578 Using insects to detect, monitor and predict the distribution of *Xylella fastidiosa* : a case study  
579 in Corsica. *Scientific Reports* 8, 15628. doi:10.1038/s41598-018-33957-z.
- 580 Denancé, N., Briand, M., Gaborieau, R., Gaillard, S., and Jacques, M.-A. (2019). Identification of  
581 genetic relationships and subspecies signatures in *Xylella fastidiosa*. *BMC Genomics* 20, 239.  
582 doi:10.1186/s12864-019-5565-9.
- 583 Denancé, N., Legendre, B., Briand, M., Olivier, V., de Boisseson, C., Poliakoff, F., et al. (2017).  
584 Several subspecies and sequence types are associated with the emergence of *Xylella fastidiosa*  
585 in natural settings in France. *Plant Pathol* 66, 1054–1064. doi:10.1111/ppa.12695.
- 586 EFSA (2018a). Update of the *Xylella* spp. host plant database. *EFSA Journal* 16.  
587 doi:10.2903/j.efsa.2018.5408.
- 588 EFSA (2018b). Updated pest categorisation of *Xylella fastidiosa*. *European Food Safety Authority*.  
589 Available at: <https://www.efsa.europa.eu/fr/efsajournal/pub/5357> [Accessed May 13, 2019].
- 590 Engels, W. R. (1993). Contributing software to the internet: the amplify program. *Trends in*  
591 *Biochemical Sciences* 18, 448–450. doi:10.1016/0968-0004(93)90148-G.
- 592 Ennajeh, M., Vadel, A. M., and Khemira, H. (2009). Osmoregulation and osmoprotection in the leaf  
593 cells of two olive cultivars subjected to severe water deficit. *Acta Physiol Plant* 31, 711–721.  
594 doi:10.1007/s11738-009-0283-6.
- 595 EPPO (2014). PM 7/98 (2) Specific requirements for laboratories preparing accreditation for a plant  
596 pest diagnostic activity. *EPPO Bull* 44. doi:10.1111/epp.12118.
- 597 EPPO (2018a). EPPO A2 List of pests recommended for regulation as quarantine pests - version 2018-  
598 09 -. Available at: [https://www.eppo.int/ACTIVITIES/plant\\_quarantine/A2\\_list](https://www.eppo.int/ACTIVITIES/plant_quarantine/A2_list) [Accessed  
599 April 12, 2018].
- 600 EPPO (2018b). PM 7/24 (3) *Xylella fastidiosa*. *EPPO Bulletin* 48, 175–218. doi:10.1111/epp.12469.
- 601 EPPO (2019). *Xylella fastidiosa* - Reporting articles. *EPPO Global Database*. Available at:  
602 <https://gd.eppo.int/taxon/XYLEFA/reporting> [Accessed March 27, 2019].

- 603 Erill, I., Campoy, S., and Barbé, J. (2007). Aeons of distress: an evolutionary perspective on the  
604 bacterial SOS response. *FEMS Microbiol Rev* 31, 637–656. doi:10.1111/j.1574-  
605 6976.2007.00082.x.
- 606 Francis, M., Lin, H., Cabrera-La Rosa, J., Doddapaneni, H., and Civerolo, E. L. (2006). Genome-based  
607 PCR primers for specific and sensitive detection and quantification of *Xylella fastidiosa*.  
608 *European journal of plant pathology*. doi:<https://doi.org/10.1007/s10658-006-9009-4>.
- 609 Harper, S. J., Ward, L. I., and Clover, G. R. G. (2010). Development of LAMP and real-time PCR  
610 methods for the rapid detection of *Xylella fastidiosa* for quarantine and field applications.  
611 *Phytopathology* 100, 1282–1288. doi:10.1094/PHYTO-06-10-0168.
- 612 Hernandez-Martinez, R., Costa, H. S., Dumenyó, C. K., and Cooksey, D. A. (2006). Differentiation of  
613 Strains of *Xylella fastidiosa* Infecting Grape, Almonds, and Oleander Using a Multiprimer PCR  
614 Assay. *Plant Disease* 90, 1382–1388. doi:10.1094/PD-90-1382.
- 615 Hulley, E. N., Tharmalingam, S., Zarnke, A., and Boreham, D. R. (2019). Development and validation  
616 of probe-based multiplex real-time PCR assays for the rapid and accurate detection of  
617 freshwater fish species. *PLOS ONE* 14, e0210165. doi:10.1371/journal.pone.0210165.
- 618 Ioos, R., Fourrier, C., Wilson, V., Webb, K., Schereffer, J.-L., and de Labrouhe, D. T. (2012). An  
619 Optimized Duplex Real-Time PCR Tool for Sensitive Detection of the Quarantine Oomycete  
620 *Plasmopara halstedii* in Sunflower Seeds. *Phytopathology* 102, 908–917. doi:10.1094/PHYTO-  
621 04-12-0068-R.
- 622 Ito, T., and Suzaki, K. (2017). Universal detection of phytoplasmas and *Xylella* spp. by TaqMan  
623 singleplex and multiplex real-time PCR with dual priming oligonucleotides. *PLOS ONE* 12,  
624 e0185427. doi:10.1371/journal.pone.0185427.
- 625 Jacques, M.-A., Denancé, N., Legendre, B., Morel, E., Briand, M., Mississippi, S., et al. (2016). New  
626 Coffee Plant-Infecting *Xylella fastidiosa* Variants Derived via Homologous Recombination.  
627 *Appl. Environ. Microbiol.* 82, 1556–1568. doi:10.1128/AEM.03299-15.
- 628 Janse, I., Hamidjaja, R. A., Hendriks, A. C., and van Rotterdam, B. J. (2013). Multiplex qPCR for  
629 reliable detection and differentiation of *Burkholderia mallei* and *Burkholderia pseudomallei*.  
630 *BMC Infectious Diseases* 13, 86. doi:10.1186/1471-2334-13-86.
- 631 Kamau, E., Alemayehu, S., Feghali, K. C., Saunders, D., and Ockenhouse, C. F. (2013). Multiplex  
632 qPCR for Detection and Absolute Quantification of Malaria. *PLOS ONE* 8, e71539.  
633 doi:10.1371/journal.pone.0071539.
- 634 Köppel, R., Schum, R., Habermacher, M., Sester, C., Piller, L. E., Meissner, S., et al. (2019). Multiplex  
635 real-time PCR for the detection of insect DNA and determination of contents of *Tenebrio*  
636 *molitor*, *Locusta migratoria* and *Achaeta domestica* in food. *Eur Food Res Technol* 245, 559–  
637 567. doi:10.1007/s00217-018-03225-5.
- 638 Koressaar, T., and Remm, M. (2007). Enhancements and modifications of primer design program  
639 Primer3. *Bioinformatics* 23, 1289–1291. doi:10.1093/bioinformatics/btm091.



- 640 Landa, B. (2017). Emergence of *Xylella fastidiosa* in Spain: current situation. Presentation made at the  
641 European Conference on *Xylella* 2017. Available at:  
642 <https://www.efsa.europa.eu/en/events/event/171113> [Accessed January 17, 2019].
- 643 Li, W., Abad, J. A., French-Monar, R. D., Rascoe, J., Wen, A., Gudmestad, N. C., et al. (2009).  
644 Multiplex real-time PCR for detection, identification and quantification of ‘*Candidatus*  
645 *Liberibacter solanacearum*’ in potato plants with zebra chip. *Journal of Microbiological*  
646 *Methods* 78, 59–65. doi:10.1016/j.mimet.2009.04.009.
- 647 Li, W., Teixeira, D. C., Hartung, J. S., Huang, Q., Duan, Y., Zhou, L., et al. (2013). Development and  
648 systematic validation of qPCR assays for rapid and reliable differentiation of *Xylella fastidiosa*  
649 strains causing citrus variegated chlorosis. *Journal of Microbiological Methods* 92, 79–89.  
650 doi:10.1016/j.mimet.2012.10.008.
- 651 Marcelletti, S., and Scortichini, M. (2016). Genome-wide comparison and taxonomic relatedness of  
652 multiple *Xylella fastidiosa* strains reveal the occurrence of three subspecies and a new *Xylella*  
653 species. *Arch Microbiol* 198, 803–812. doi:10.1007/s00203-016-1245-1.
- 654 Minsavage, G., Thompson, C., Hopkins, D., Leite, R., and Stall, R. (1994). Development of a  
655 Polymerase Chain Reaction Protocol for Detection of *Xylella fastidiosa* in Plant Tissue.  
656 *Phytopathology* 84, 456. doi:10.1094/Phyto-84-456.
- 657 Modesti, V., Pucci, N., Lucchesi, S., Campus, L., and Loreti, S. (2017). Experience of the Latium  
658 region (Central Italy) as a pest-free area for monitoring of *Xylella fastidiosa*: distinctive features  
659 of molecular diagnostic methods. *Eur J Plant Pathol* 148, 557–566. doi:10.1007/s10658-016-  
660 1111-7.
- 661 Morris, C. E., Monier, J.-M., and Jacques, M.-A. (1998). A Technique To Quantify the Population Size  
662 and Composition of the Biofilm Component in Communities of Bacteria in the Phyllosphere.  
663 *Appl Environ Microbiol* 64, 4789–4795.
- 664 Mougel, C., Cournoyer, B., and Nesme, X. (2001). Novel Tellurite-Amended Media and Specific  
665 Chromosomal and Ti Plasmid Probes for Direct Analysis of Soil Populations of *Agrobacterium*  
666 *Biovars* 1 and 2. *Appl. Environ. Microbiol.* 67, 65–74. doi:10.1128/AEM.67.1.65-74.2001.
- 667 Nunney, L., Azad, H., and Stouthamer, R. (2019). An Experimental Test of the Host-Plant Range of  
668 Nonrecombinant Strains of North American *Xylella fastidiosa* subsp. *multiplex*.  
669 *Phytopathology* 109, 294–300. doi:10.1094/PHYTO-07-18-0252-FI.
- 670 Ortega-Garcia, F., Blanco, S., Peinado, M. A., and Peragon, J. (2008). Polyphenol oxidase and its  
671 relationship with oleuropein concentration in fruits and leaves of olive (*Olea europaea*) cv.  
672 “Picual” trees during fruit ripening. *Tree Physiology* 28, 45–54. doi:10.1093/treephys/28.1.45.
- 673 Ouyang, P., Arif, M., Fletcher, J., Melcher, U., and Corona, F. M. O. (2013). Enhanced Reliability and  
674 Accuracy for Field Deployable Bioforensic Detection and Discrimination of *Xylella fastidiosa*  
675 subsp. *pauca*, Causal Agent of Citrus Variegated Chlorosis Using Razor Ex Technology and  
676 TaqMan Quantitative PCR. *PLOS ONE* 8, e81647. doi:10.1371/journal.pone.0081647.

- 677 Reisenzein, H. (2017). “PCR assays for the detection of *Xylella fastidiosa*. Review and comparison of  
678 published protocols,” in *Xylella fastidiosa & the Olive Quick Decline Syndrome (OQDS). A  
679 serious worldwide challenge for the safeguard of olive trees* Options Méditerranéennes : Série  
680 A. Séminaires Méditerranéens., eds. A. M. D’Onghia, F. Valentini, and S. Brunel (Bari :  
681 CIHEAM), 57–60. Available at: <http://om.ciheam.org/om/pdf/a121/00007213.pdf>.
- 682 Rogers, E. E. (2016). Deep 16S rRNA gene sequencing of anterior foregut microbiota from the blue-  
683 green sharpshooter (*Graphocephala atropunctata*). *Journal of Applied Entomology* 140, 801–  
684 805. doi:10.1111/jen.12303.
- 685 Saponari, M., Boscia, D., Nigro, F., and Martelli, G. P. (2013). Identification of DNA sequences related  
686 to *Xylella fastidiosa* in oleander, almond and olive trees exhibiting leaf scorch symptoms in  
687 Apulia (southern Italy). *Journal of Plant Pathology* 95.  
688 doi:<http://dx.doi.org/10.4454/JPP.V95I3.035>.
- 689 Schneider, E., Heydt, H. von der, and Esperester, A. (2008). Evaluation of Polyphenol Composition in  
690 Red Leaves from Different Varieties of *Vitis vinifera*. *Planta Med* 74, 565–572. doi:10.1055/s-  
691 2008-1034370.
- 692 Schrader, C., Schielke, A., Ellerbroek, L., and Johne, R. (2012). PCR inhibitors – occurrence,  
693 properties and removal. *Journal of Applied Microbiology* 113, 1014–1026. doi:10.1111/j.1365-  
694 2672.2012.05384.x.
- 695 Sipahioglu, H. M., Usta, M., and Ocak, M. (2006). Use of dried high-phenolic laden host leaves for  
696 virus and viroid preservation and detection by PCR methods. *Journal of Virological Methods*  
697 137, 120–124. doi:10.1016/j.jviromet.2006.06.009.
- 698 Tanaka, K. J., Song, S., Mason, K., and Pinkett, H. W. (2018). Selective substrate uptake: The role of  
699 ATP-binding cassette (ABC) importers in pathogenesis. *Biochim Biophys Acta* 1860, 868–877.  
700 doi:10.1016/j.bbamem.2017.08.011.
- 701 Wang, F., Feng, J., Ye, S., Huang, H., and Zhang, X. (2018). Development of a multiplex fluorescence  
702 quantitative PCR for detection of genetically modified organisms. *Biologia* 73, 21–29.  
703 doi:10.2478/s11756-018-0004-y.
- 704 Wei, S., Daliri, E. B.-M., Chelliah, R., Park, B.-J., Lim, J.-S., Baek, M.-A., et al. (2019). Development  
705 of a multiplex real-time PCR for simultaneous detection of *Bacillus cereus*, *Listeria*  
706 *monocytogenes*, and *Staphylococcus aureus* in food samples. *Journal of Food Safety* 39,  
707 e12558. doi:10.1111/jfs.12558.
- 708 Wei, T., Lu, G., and Clover, G. (2008). Novel approaches to mitigate primer interaction and eliminate  
709 inhibitors in multiplex PCR, demonstrated using an assay for detection of three strawberry  
710 viruses. *Journal of Virological Methods* 151, 132–139. doi:10.1016/j.jviromet.2008.03.003.
- 711 Wells, J. M., Raju, B. C., Nyland, G., and Lowe, S. K. (1981). Medium for Isolation and Growth of  
712 Bacteria Associated with Plum Leaf Scald and Phony Peach Diseases. *Appl Environ Microbiol*  
713 42, 357–363.

- 714 Wilkins, T. A., and Smart, L. B. (1996). “Isolation of RNA from plant tissue,” in *A laboratory guide*  
715 *to RNA: isolation, analysis, and synthesis* New York: Wiley-Liss. (Krieg, P. A.), 21–42.
- 716 Willsey, T. L., Chatterton, S., Heynen, M., and Erickson, A. (2018). Detection of interactions between  
717 the pea root rot pathogens *Aphanomyces euteiches* and *Fusarium* spp. using a multiplex qPCR  
718 assay. *Plant Pathology* 67, 1912–1923. doi:10.1111/ppa.12895.
- 719 Wilson, G. G., and Murray, N. E. (1991). Restriction and Modification Systems. *Annual Review of*  
720 *Genetics* 25, 585–627. doi:10.1146/annurev.ge.25.120191.003101.
- 721 Witte, A. K., Sickha, R., Mester, P., Fister, S., Schoder, D., and Rossmannith, P. (2018). Essential role  
722 of polymerases for assay performance – Impact of polymerase replacement in a well-  
723 established assay. *Biomolecular Detection and Quantification* 16, 12–20.  
724 doi:10.1016/j.bdq.2018.10.002.
- 725 Yoshida, T., Phadtare, S., and Inouye, M. (2007). “The Design and Development of Tar-EnvZ  
726 Chimeric Receptors,” in *Methods in Enzymology Two-Component Signaling Systems, Part B.*,  
727 eds. M. I. Simon, B. R. Crane, and A. Crane (Academic Press), 166–183. doi:10.1016/S0076-  
728 6879(07)23007-1.
- 729 Yuan, X., Morano, L., Bromley, R., Spring-Pearson, S., Stouthamer, R., and Nunney, L. (2010).  
730 Multilocus Sequence Typing of *Xylella fastidiosa* Causing Pierce’s Disease and Oleander Leaf  
731 Scorch in the United States. *Phytopathology* 100, 601–611. doi:10.1094/PHYTO-100-6-0601.
- 732 Zitnick-Anderson, K., Simons, K., and Pasche, J. S. (2018). Detection and qPCR quantification of  
733 seven *Fusarium* species associated with the root rot complex in field pea. *Canadian Journal of*  
734 *Plant Pathology* 40, 261–271. doi:10.1080/07060661.2018.1429494.

735

## 736 **Tables**

737 Table 1: List of strains used in this study and signals obtained with the primers and probe  
738 combinations in simplex qPCR assays on DNA suspensions calibrated at OD<sub>600nm</sub> = 0.1.

739 Table 2: Description and composition of the longest specific long-mers obtained using SkIf for  
740 the various targets.

741 Table 3: Primers and probes designed in this study for *Xf* detection at the species and subspecies  
742 level.

743 Table 4: Efficiency of the primer and probe sets in simplex qPCR assays on extracted DNA of  
744 bacterial strains in comparison with the Harper’s test (Harper et al., 2010). A, Mean Ct value for each  
745 primer and probe set on target strains; B, Percentage of efficiency and standard curve parameters of  
746 each primer and probe set on target strains.

747 Table 5: Limit of detection (LOD) of *X. fastidiosa* strains in spiked matrices using the tetraplex  
748 qPCR assay XF – XFFSL – XFM – XFP (set n°1) in comparison with the reference test (Harper’s test,  
749 Harper et al., 2010).

750 Table 6: Detection of *X. fastidiosa* in environmental plant samples with low population sizes  
751 using the tetraplex qPCR assay set n° 1 in comparison with the reference test (Harper's test, Harper et  
752 al., 2010).

753 Table 7: Detection of *X. fastidiosa* in inoculated plants using the tetraplex qPCR assay (set n° 1)  
754 in comparison with the reference test (Harper's test, Harper et al., 2010).

755 **Additional files**

756 Supplemental data 1: *Xffsl* specific kmer identified

757 Supplemental data 2: Efficiency of primers and probes sets multiplexed in tetraplex qPCR assays N°  
758 1, 2 and 3 on Xf strains.

759 Supplemental data 3: In silico assessment of the specificity of *X. fastidiosa* subsp. *fastidiosa* (Xff) and  
760 *X. fastidiosa* subsp. *multiplex* (Xfm) primers and probe sets proposed by Burbank et al., 2018.

761 Supplemental data 4: Assessment of target specificity of Burbank et al., 2018 Xff and Xfm primers  
762 and probe sets using collections of strains.

763 Supplemental data 5: LOD of *X. fastidiosa* in spiked matrices using the tetraplex qPCR assay XF –  
764 XFF – XFM – XFP (set n°2).

765 Supplemental data 6: LOD of *X. fastidiosa* in spiked matrices using the tetraplex qPCR assay XF –  
766 XFF – XFM – XFMO (set n°3).

767 Supplemental data 7: Detection *X. fastidiosa* in dilution ranges of spiked matrices using the tetraplex  
768 qPCR assay XF – XFFSL – XFM – XFP (set n°1)

769 Supplemental data 8: Comparison of LOD of *X. fastidiosa* subsp. *fastidiosa* strain CFBP 7970 using  
770 the multiplex sets n°1, n°4, n°5 and n°6.

771 Supplemental data 9: Comparison of LOD of *X. fastidiosa* in spiked matrices using the multiplex set  
772 n°1, n°4, n°5 and n°6.

773

774  
775  
776

**Table 1: List of strains used in this study and signals obtained with the primers and probe combinations in simplex qPCR assays on DNA suspensions calibrated at  $OD_{600nm} = 0.1$ .**

| Strain code     | Nomenclature                                             | Mean Ct value for each primer and probe set |       |       |       |     |       |
|-----------------|----------------------------------------------------------|---------------------------------------------|-------|-------|-------|-----|-------|
|                 |                                                          | XF <sup>a</sup>                             | XFF   | XFM   | XFMO  | XFP | XFFSL |
| CFBP 6448       | <i>Agrobacterium rubi</i>                                | na <sup>b</sup>                             | na    | na    | na    | na  | na    |
| CFBP 2413       | <i>Agrobacterium tumefaciens</i>                         | na                                          | na    | na    | na    | na  | na    |
| CFBP 5523       | <i>Agrobacterium vitis</i>                               | na                                          | na    | na    | na    | na  | na    |
| CFBP 2404       | <i>Clavibacter insidiosus</i>                            | na                                          | na    | na    | na    | na  | na    |
| CFBP 1200       | <i>Dickeya dianthicola</i>                               | na                                          | na    | na    | na    | na  | na    |
| CFBP 5561       | <i>Ensifer meliloti</i>                                  | na                                          | na    | na    | na    | na  | na    |
| CFBP 1232       | <i>Erwinia amylovora</i>                                 | na                                          | na    | na    | na    | na  | na    |
| CFBP 3845       | <i>Pantoea agglomerans</i>                               | na                                          | na    | na    | na    | na  | na    |
| CFBP 3167       | <i>Pantoea stewartii</i> pv. <i>stewartii</i>            | na                                          | na    | na    | na    | na  | na    |
| CFBP 3205       | <i>Pseudomonas amygdali</i>                              | na                                          | na    | na    | na    | na  | na    |
| CFBP 8305       | <i>Pseudomonas cerasi</i>                                | na                                          | na    | na    | na    | na  | na    |
| CFBP 1573       | <i>Pseudomonas syringae</i> pv. <i>persicae</i>          | na                                          | na    | na    | na    | na  | na    |
| CFBP 1392       | <i>Pseudomonas syringae</i> pv. <i>syringae</i>          | na                                          | na    | na    | na    | na  | na    |
| CFBP 7436       | <i>Rhizobium nepotum</i>                                 | na                                          | na    | na    | na    | na  | na    |
| CFBP 13100      | <i>Stenotrophomonas maltophilia</i>                      | na                                          | na    | na    | na    | na  | na    |
| CFBP 3371       | <i>Xanthomonas euvesicatoria</i> pv. <i>citrumelonis</i> | na                                          | na    | na    | na    | na  | na    |
| CFBP 2528       | <i>Xanthomonas arboricola</i> pv. <i>juglandis</i>       | na                                          | na    | na    | na    | na  | na    |
| CFBP 2535       | <i>Xanthomonas arboricola</i> pv. <i>pruni</i>           | na                                          | na    | na    | na    | na  | na    |
| CFBP 4924       | <i>Xanthomonas axonopodis</i> pv. <i>axonopodis</i>      | na                                          | na    | na    | na    | na  | na    |
| CFBP 5241       | <i>Xanthomonas campestris</i> pv. <i>campestris</i>      | na                                          | na    | na    | na    | na  | na    |
| CFBP 2901       | <i>Xanthomonas citri</i> pv. <i>aurantifolii</i>         | na                                          | na    | na    | na    | na  | na    |
| CFBP 2525       | <i>Xanthomonas citri</i> pv. <i>citri</i>                | na                                          | na    | na    | na    | na  | na    |
| CFBP 7660       | <i>Xanthomonas citri</i> pv. <i>viticola</i>             | na                                          | na    | na    | na    | na  | na    |
| CFBP 2625       | <i>Xanthomonas gardneri</i>                              | na                                          | na    | na    | na    | na  | na    |
| CFBP 2533       | <i>Xanthomonas hortorum</i> pv. <i>pelargonii</i>        | na                                          | na    | na    | na    | na  | na    |
| CFBP 1156       | <i>Xanthomonas hyacinthi</i>                             | na                                          | na    | na    | na    | na  | na    |
| CFBP 2532       | <i>Xanthomonas oryzae</i> pv. <i>oryzae</i>              | na                                          | na    | na    | na    | na  | na    |
| CFBP 2054       | <i>Xanthomonas translucens</i>                           | na                                          | na    | na    | na    | na  | na    |
| CFBP 2543       | <i>Xanthomonas vasicola</i> pv. <i>holcicola</i>         | na                                          | na    | na    | na    | na  | na    |
| CFBP 1192       | <i>Xylophilus ampelinus</i>                              | na                                          | na    | na    | na    | na  | na    |
| CFBP 13349      | <i>Xylella fastidiosa</i> subsp. <i>fastidiosa</i>       | 20.81                                       | 19.02 | na    | na    | na  | 20.06 |
| CFBP 13354      | <i>Xylella fastidiosa</i> subsp. <i>fastidiosa</i>       | 20.20                                       | 18.1  | na    | na    | na  | 18.83 |
| Temecula 1      | <i>Xylella fastidiosa</i> subsp. <i>fastidiosa</i>       | 20.83                                       | 19.13 | na    | na    | na  | 22.41 |
| CFBP 7969       | <i>Xylella fastidiosa</i> subsp. <i>fastidiosa</i>       | 19.81                                       | 17.68 | na    | na    | na  | 18.51 |
| CFBP 7970       | <i>Xylella fastidiosa</i> subsp. <i>fastidiosa</i>       | 19.33                                       | 17.04 | na    | na    | na  | 21.66 |
| CFBP 8069       | <i>Xylella fastidiosa</i> subsp. <i>fastidiosa</i>       | 21.19                                       | 19.68 | na    | na    | na  | 20.03 |
| CFBP 8071       | <i>Xylella fastidiosa</i> subsp. <i>fastidiosa</i>       | 19.89                                       | 17.94 | na    | na    | na  | 18.42 |
| CFBP 8082       | <i>Xylella fastidiosa</i> subsp. <i>fastidiosa</i>       | 20.21                                       | 18.85 | na    | na    | na  | 24.58 |
| CFBP 8083       | <i>Xylella fastidiosa</i> subsp. <i>fastidiosa</i>       | 19.37                                       | 17.91 | na    | na    | na  | 18.25 |
| CFBP 8351       | <i>Xylella fastidiosa</i> subsp. <i>fastidiosa</i>       | 19.38                                       | 17.63 | na    | na    | na  | 20.16 |
| CFBP 8084       | <i>Xylella fastidiosa</i> subsp. <i>morus</i>            | 21.86                                       | na    | na    | 21.48 | na  | 18.94 |
| CFBP 8076       | <i>Xylella fastidiosa</i> subsp. <i>multiplex</i>        | 19.88                                       | na    | 19.41 | na    | na  | na    |
| CFBP 8078       | <i>Xylella fastidiosa</i> subsp. <i>multiplex</i>        | 23.81                                       | na    | 23.58 | na    | na  | na    |
| CFBP 13552      | <i>Xylella fastidiosa</i> subsp. <i>multiplex</i>        | 19.44                                       | na    | 18.73 | na    | na  | na    |
| AlmaEm3         | <i>Xylella fastidiosa</i> subsp. <i>multiplex</i>        | 20.36                                       | na    | 19.71 | na    | na  | na    |
| ALS6            | <i>Xylella fastidiosa</i> subsp. <i>multiplex</i>        | 20.43                                       | na    | 20.05 | na    | na  | na    |
| BB08-1          | <i>Xylella fastidiosa</i> subsp. <i>multiplex</i>        | 20.46                                       | na    | 19.94 | na    | na  | na    |
| CFBP 8173       | <i>Xylella fastidiosa</i> subsp. <i>multiplex</i>        | 20.59                                       | na    | 19.8  | na    | na  | na    |
| Georgia Plum    | <i>Xylella fastidiosa</i> subsp. <i>multiplex</i>        | 20.49                                       | na    | 20.07 | na    | na  | na    |
| GIL GRA 274 Ext | <i>Xylella fastidiosa</i> subsp. <i>multiplex</i>        | 19.45                                       | na    | 19.37 | na    | na  | na    |
| L 95-2          | <i>Xylella fastidiosa</i> subsp. <i>multiplex</i>        | 21.17                                       | na    | 20.95 | na    | na  | na    |
| LLA FAL 718 A   | <i>Xylella fastidiosa</i> subsp. <i>multiplex</i>        | 20.16                                       | na    | 20.12 | na    | na  | na    |

|                 |                                                   |       |    |       |    |       |       |
|-----------------|---------------------------------------------------|-------|----|-------|----|-------|-------|
| T.Oak 95-1      | <i>Xylella fastidiosa</i> subsp. <i>multiplex</i> | 19.37 | na | 19.36 | na | na    | na    |
| UVA 519-1B      | <i>Xylella fastidiosa</i> subsp. <i>multiplex</i> | 19.90 | na | 19.94 | na | na    | na    |
| VAL VAL 072 Ext | <i>Xylella fastidiosa</i> subsp. <i>multiplex</i> | 21.95 | na | 19.78 | na | na    | na    |
| CFBP 8416       | <i>Xylella fastidiosa</i> subsp. <i>multiplex</i> | 21.08 | na | 20.2  | na | na    | na    |
| CFBP 8432       | <i>Xylella fastidiosa</i> subsp. <i>multiplex</i> | 20.33 | na | 20.34 | na | na    | na    |
| CFBP 8072       | <i>Xylella fastidiosa</i> subsp. <i>pauca</i>     | 18.72 | na | na    | na | 18.19 | na    |
| CFBP 8074       | <i>Xylella fastidiosa</i> subsp. <i>pauca</i>     | 22.80 | na | na    | na | 20.66 | na    |
| CFBP 8402       | <i>Xylella fastidiosa</i> subsp. <i>pauca</i>     | 21.04 | na | na    | na | 19.51 | na    |
| CFBP 8429       | <i>Xylella fastidiosa</i> subsp. <i>pauca</i>     | 26.06 | na | na    | na | 25.22 | na    |
| CFBP 8477       | <i>Xylella fastidiosa</i> subsp. <i>pauca</i>     | 23.59 | na | na    | na | 22.91 | na    |
| CFBP 8495       | <i>Xylella fastidiosa</i> subsp. <i>pauca</i>     | 20.00 | na | na    | na | 19.19 | na    |
| CFBP 8498       | <i>Xylella fastidiosa</i> subsp. <i>pauca</i>     | 21.46 | na | na    | na | 19.71 | na    |
| CFBP 8077       | <i>Xylella fastidiosa</i> subsp. <i>sandyi</i>    | 19.31 | na | na    | na | na    | 20.52 |
| CFBP 8356       | <i>Xylella fastidiosa</i> subsp. <i>sandyi</i>    | 20.55 | na | na    | na | na    | 21.41 |
| CFBP 8419       | <i>Xylella fastidiosa</i> subsp. <i>sandyi</i>    | 23.38 | na | na    | na | na    | 24.23 |
| CFBP 8478       | <i>Xylella fastidiosa</i> subsp. <i>sandyi</i>    | 22.75 | na | na    | na | na    | 23.58 |
| MED PRI 047     | <i>Xylella fastidiosa</i> subsp. <i>sandyi</i>    | 20.96 | na | na    | na | na    | 22.13 |

777 <sup>a</sup>: see Table 3 for description of codes of primer and probe sets

778 <sup>b</sup>: not amplified

779

**Table 2: Description and composition of the longest specific long-mers obtained using SkIf for the various targets.**

| <b>Target <sup>a</sup></b> | <b>Long-mer size (bp)</b> | <b>Long-mer position (in the genome of the given strain)</b> | <b>Targeted CDS: locus name, position</b>                                                                                                                               | <b>Putative function</b>                                             |
|----------------------------|---------------------------|--------------------------------------------------------------|-------------------------------------------------------------------------------------------------------------------------------------------------------------------------|----------------------------------------------------------------------|
| <b>XF</b>                  | 986                       | 1,254,689 - 1,255,674 (M23)                                  | WP_004084873,<br>1,254,698 - 1,255,674                                                                                                                                  | Ketol-acid reductoisomerase                                          |
| <b>XFF</b>                 | 516                       | 2,477,123 - 2,477,638 (M23)                                  | ACB93575,<br>2,476,428 - 2,477,645                                                                                                                                      | Restriction modification system                                      |
| <b>XFFSL</b>               | 227                       | 719,367-719,593 (M23)                                        | ACB92051,<br>719,717 - 718,980                                                                                                                                          | Unknown                                                              |
| <b>XFM</b>                 | 1660                      | 1,825,046-1,826,705 <sup>b</sup> (M12)                       | WP_004083558,<br>1,824,865 -1,825,101<br>WP_004083559,<br>1,825,613 - 1,825,855 /<br>WP_004083560,<br>1,826,106 - 1,826,489 /<br>WP_004083562,<br>1,826,593 - 1,826,768 | Unknown<br>Unknown<br>DNA adenine methylase<br>DNA adenine methylase |
| <b>XFMO</b>                | 288                       | 1,908,250-1,908,548 (MUL0034)                                | AIC14009,<br>1,908,261 - 1,908,798                                                                                                                                      | Peptidase S24                                                        |
| <b>XFP</b>                 | 876                       | 337,676 - 338,551 <sup>b</sup> (De Donno)                    | ARO67912,<br>336,864 - 338,246 /<br>ARO69620,<br>338,246 - 339,286                                                                                                      | Histidine kinase<br>ABC transporter substrate-binding                |

781 <sup>a</sup>: see Table 3 for description of codes of primer and probe sets782 <sup>b</sup>: the long-mer is overlapping several CDS

783

784

**Table 3: Primers and probes designed in this study for *Xf* detection at the species and subspecies level.**

| Target species                                            | Primers and probe name | Sequence (5'-3')                    | Amplicon size (bp) | Position (reference genome) |
|-----------------------------------------------------------|------------------------|-------------------------------------|--------------------|-----------------------------|
| <i>X. fastidiosa</i>                                      |                        |                                     |                    |                             |
|                                                           | <i>XF-F</i>            | AACCTGCGTGACTCTGGTTT                |                    | 1,254,770 (M23)             |
|                                                           | <i>XF-R</i>            | CATGTTTCGCTGCTTGGTCC                | 118                | 1,254,868                   |
|                                                           | <i>XF-P</i>            | FAM-GCTCAGGCTGACGGTTTCACAGTGCA-BHQ1 |                    | 1,254,836                   |
| <i>X. fastidiosa</i> subsp. <i>fastidiosa</i>             |                        |                                     |                    |                             |
|                                                           | <i>XFF-F</i>           | TTACATCGTTTTTCGCGCACG               |                    | 2,477,405 (M23)             |
|                                                           | <i>XFF-R</i>           | TCGGTTGATCGCAATACCCA                | 100                | 2,477,435                   |
|                                                           | <i>XFF-P</i>           | HEX-CCCGACTCGGCGCGGTTCCA-BHQ1       |                    | 2,477,485                   |
| <i>X. fastidiosa</i> subsp. <i>fastidiosa</i> sensu largo |                        |                                     |                    |                             |
|                                                           | <i>XFFSL-F</i>         | TAGTATGCGTGCGAGCGAC                 |                    | 719,396 (M23)               |
|                                                           | <i>XFFSL-R</i>         | CGCAATGCACACCTAAGCAA                | 75                 | 719,451                     |
|                                                           | <i>XFFSL-P</i>         | HEX-CGCGTACCCACTCACGCCGC-BHQ1       |                    | 719,417                     |
| <i>X. fastidiosa</i> subsp. <i>multiplex</i>              |                        |                                     |                    |                             |
|                                                           | <i>XFM-F</i>           | ACGATGTTTGAGCCGTTTGC                |                    | 1,826,193 (M12)             |
|                                                           | <i>XFM-R</i>           | TGTCACCCACTACGAAACGG                | 88                 | 1,826,261                   |
|                                                           | <i>XFM-P</i>           | ROX-ACGCAGCCCACCACGATTTAGCCG-BHQ2   |                    | 1,826,236                   |
| <i>X. fastidiosa</i> subsp. <i>morus</i>                  |                        |                                     |                    |                             |
|                                                           | <i>XFMO-F</i>          | TAACGCTATCGGCAGGTAGC                |                    | 1,908,399 (MUL0034)         |
|                                                           | <i>XFMO-R</i>          | GCATCAGCTTACGTCTCCT                 | 123                | 1,908,502                   |
|                                                           | <i>XFMO-P</i>          | CY5-GGTTCCGCACCTCACATATCCGCCC-BHQ2  |                    | 1,908,482                   |



---

*X. fastidiosa* subsp. *pauca*

|              |                                |     |                    |
|--------------|--------------------------------|-----|--------------------|
| <i>AFP-F</i> | TGCGTTTTTCCTAGGTGGCAT          |     | 338,221 (De Donno) |
| <i>AFP-R</i> | GTTGGAACCTTGAATGCGCA           | 154 | 338,355            |
| <i>AFP-P</i> | CY5- CCAAAGGGCGGCCACCTCGC-BHQ2 |     | 338,332            |

---

786

787

788  
789  
790

**Table 4: Efficiency of the primer and probe sets in simplex qPCR assays on extracted DNA of bacterial strains in comparison with the Harper's test (Harper *et al.*, 2010). A, Mean Ct value for each primer and probe set on target strains; B, Percentage of efficiency and standard curve parameters of each primer and probe set on target strains.**

791 **A.**

Mean Ct value (SEM) for each primer and probe set (target strain code)

| DNA concentration       | Theoretical number of genome copy.mL <sup>-1</sup> | XF (CFBP 7970)               | XFF (CFBP 7970) | XFM (CFBP 8416) | XFMO (CFBP 8084) | XFP (CFBP 8402) | XFFSL (CFBP 7970) | XFFSL (CFBP 8084) | Harper's (CFBP 7970)         | Harper's (CFBP 8416) | Harper's (CFBP 8084) | Harper's (CFBP 8402) |
|-------------------------|----------------------------------------------------|------------------------------|-----------------|-----------------|------------------|-----------------|-------------------|-------------------|------------------------------|----------------------|----------------------|----------------------|
| 1 µg.mL <sup>-1</sup>   | 4x10 <sup>8</sup>                                  | 20.03 <sup>a</sup><br>(0.08) | 18.47<br>(0.16) | 19.34<br>(0.04) | 19.09<br>(0.03)  | 16.64<br>(0.12) | 18.67<br>(0.01)   | 18.94<br>(0.04)   | 17.82<br>(0.02)              | 17.36<br>(0.05)      | 17.80<br>(0.04)      | 16.58<br>(0.04)      |
| 100 ng.mL <sup>-1</sup> | 4x10 <sup>7</sup>                                  | 23.31<br>(0.10)              | 21.88<br>(0.07) | 22.80<br>(0.10) | 22.78<br>(0.10)  | 19.63<br>(0.06) | 22.09<br>(0.05)   | 23.10<br>(0.08)   | 21.45<br>(0.33)              | 21.03<br>(0.09)      | 22.13<br>(0.34)      | 19.23<br>(0.03)      |
| 10 ng.mL <sup>-1</sup>  | 4x10 <sup>6</sup>                                  | 26.56<br>(0.03)              | 25.49<br>(0.06) | 26.18<br>(0.09) | 25.91<br>(0.07)  | 22.93<br>(0.10) | 26.84<br>(1.01)   | 27.55<br>(0.06)   | 25.88<br>(0.06)              | 25.35<br>(0.12)      | 25.55<br>(1.55)      | 22.76<br>(0.04)      |
| 1 ng.mL <sup>-1</sup>   | 4x10 <sup>5</sup>                                  | 30.22<br>(0.19)              | 28.65<br>(0.07) | 29.06<br>(0.12) | 28.89<br>(0.08)  | 25.95<br>(0.07) | 28.61<br>(0.24)   | 30.78<br>(0.04)   | 29.98<br>(0.16) <sup>a</sup> | 29.02<br>(0.11)      | 29.36<br>(0.11)      | 25.77<br>(0.15)      |
| 100 pg.mL <sup>-1</sup> | 4x10 <sup>4</sup>                                  | 33.36<br>(0.43)              | 31.57<br>(0.18) | 32.42<br>(0.37) | 32.18<br>(0.20)  | 28.95<br>(0.08) | 31.82<br>(0.85)   | 33.44<br>(0.16)   | na                           | na                   | 32.53<br>(0.20)      | 31.55<br>(0.16)      |
| 10 pg.mL <sup>-1</sup>  | 4x10 <sup>3</sup>                                  | 36.28<br>(1.36)              | na              | 37.37<br>(0.72) | 36.07<br>(0.59)  | 31.82<br>(0.59) | 33.86<br>(3.63)   | 38.52<br>(0.08)   | na                           | na                   | na                   | 34.28<br>(0.73)      |
| 1 pg.mL <sup>-1</sup>   | 4x10 <sup>2</sup>                                  | na <sup>b</sup>              | na              | na              | na               | na              | na                | na                | na                           | na                   | na                   | na                   |

792 <sup>a</sup>: a signal is considered positive when obtained in at least two of the three technical repetitions and the lowest concentration at which a signal is obtained  
793 is the LOD

794 <sup>b</sup>: not detected

795

796 **B.**

| Target | Strain code | Efficiency | R <sup>2</sup> | Slope  |
|--------|-------------|------------|----------------|--------|
| XF     | CFBP 7970   | 101.4%     | 0.978          | -3.289 |
| XFF    | CFBP 7970   | 101.1%     | 0.997          | -3.297 |
| XFM    | CFBP 8416   | 100.4%     | 0.995          | -3.311 |
| XFMO   | CFBP 8084   | 100.0%     | 0.996          | -3.299 |
| XFP    | CFBP 8402   | 112.6%     | 0.995          | -3.052 |
| XFFSL  | CFBP 7970   | 95.5%      | 0.996          | -3.434 |
| XFFSL  | CFBP 8084   | 102.0%     | 0.957          | -3.274 |

797

798  
799

**Table 5: Limit of detection (LOD) of *X. fastidiosa* strains in spiked matrices using the tetraplex qPCR assay XF – XFFSL – XFM – XFP (set n°1) in comparison with the reference test (Harper's test, Harper et al., 2010).**

| Spiked strains (subsp.)                                           | XF                                          |         | XFFSL                          |                 | XFM                            |         | XFP                            |                   | Harper's test                  |                   |
|-------------------------------------------------------------------|---------------------------------------------|---------|--------------------------------|-----------------|--------------------------------|---------|--------------------------------|-------------------|--------------------------------|-------------------|
|                                                                   | LOD <sup>a</sup><br>(CFU.mL <sup>-1</sup> ) | Mean Ct | LOD<br>(CFU.mL <sup>-1</sup> ) | Mean Ct         | LOD<br>(CFU.mL <sup>-1</sup> ) | Mean Ct | LOD<br>(CFU.mL <sup>-1</sup> ) | Mean Ct           | LOD<br>(CFU.mL <sup>-1</sup> ) | Mean Ct           |
| <i>Cistus monspeliensis</i>                                       |                                             |         |                                |                 |                                |         |                                |                   |                                |                   |
| CFBP 7970 ( <i>fastidiosa</i> )                                   | 1x10 <sup>4</sup>                           | 26.06   | 1x10 <sup>4</sup>              | 37.87           |                                | na      |                                | na                | 1x10 <sup>2</sup>              | 36.37             |
| CFBP 8416 ( <i>multiplex</i> )                                    | 1x10 <sup>5</sup>                           | 29.11   |                                | na <sup>c</sup> | 1x10 <sup>4</sup>              | 30.14   |                                | na                | 1x10 <sup>3</sup>              | 36.48             |
| <i>Citrus clementina</i>                                          |                                             |         |                                |                 |                                |         |                                |                   |                                |                   |
| CFBP 8402 ( <i>pauca</i> )                                        | 1x10 <sup>4</sup>                           | 27.17   |                                | na              |                                | na      | 1x10 <sup>3</sup>              | 27.53             | 1x10 <sup>2</sup>              | 37.26             |
| CFBP 8416 ( <i>multiplex</i> )                                    | 1x10 <sup>4</sup>                           | 26.40   |                                | na              | 1x10 <sup>3</sup>              | 28.63   |                                | na                | 1x10 <sup>3</sup>              | 31.72             |
| <i>Helichrysum italicum</i>                                       |                                             |         |                                |                 |                                |         |                                |                   |                                |                   |
| CFBP 8416 ( <i>multiplex</i> )                                    | 1x10 <sup>3</sup>                           | 30.02   |                                | na              | 1x10 <sup>3</sup>              | 31.06   |                                | na                | 1x10 <sup>3</sup>              | 32.96             |
| <i>Lavandula angustifolia</i>                                     |                                             |         |                                |                 |                                |         |                                |                   |                                |                   |
| CFBP 8402 ( <i>pauca</i> )                                        | 1x10 <sup>4</sup>                           | 27.64   |                                | na              |                                | na      | 1x10 <sup>4</sup>              | 26.90             | 1x10 <sup>3</sup>              | 33.04             |
| CFBP 8416 ( <i>multiplex</i> )                                    | 1x10 <sup>4</sup>                           | 27.09   |                                | na              | 1x10 <sup>4</sup>              | 27.92   |                                | na                | 1x10 <sup>3</sup>              | 33.71             |
| <i>Nerium oleander</i>                                            |                                             |         |                                |                 |                                |         |                                |                   |                                |                   |
| CFBP 8402 ( <i>pauca</i> )                                        | 1x10 <sup>4</sup>                           | 35.12   |                                | na              |                                | na      | 1x10 <sup>4</sup>              | 27.26             | 1x10 <sup>3</sup>              | 35.86             |
| CFBP 8416 ( <i>multiplex</i> )                                    | 1x10 <sup>4</sup>                           | 28.74   |                                | na              | 1x10 <sup>4</sup>              | 26.84   |                                | na                | 1x10 <sup>3</sup>              | 35.15             |
| CFBP 8402 ( <i>pauca</i> )<br>+ CFBP 8416<br>( <i>multiplex</i> ) | 1x10 <sup>4</sup>                           | 28.40   |                                | na              | 5x10 <sup>3</sup>              | 29.25   |                                | 5x10 <sup>4</sup> | 25.97                          | 1x10 <sup>3</sup> |
| <i>Olea europaea</i> <sup>b</sup>                                 |                                             |         |                                |                 |                                |         |                                |                   |                                |                   |
| CFBP 8402 ( <i>pauca</i> )                                        | 1x10 <sup>5</sup>                           | 24.87   |                                | na              |                                | na      | 1x10 <sup>4</sup>              | 25.44             | 1x10 <sup>3</sup>              | 33.71             |
|                                                                   | 1x10 <sup>6</sup>                           | 26.06   |                                | na              |                                | na      | 1x10 <sup>6</sup>              | 25.63             | 1x10 <sup>4</sup>              | 34.70             |
| CFBP 8416 ( <i>multiplex</i> )                                    | 1x10 <sup>5</sup>                           | 25.02   |                                | na              | 1x10 <sup>5</sup>              | 25.23   |                                | na                | 1x10 <sup>3</sup>              | 36.10             |
|                                                                   | 1x10 <sup>5</sup>                           | 28.69   |                                | na              | 1x10 <sup>5</sup>              | 30.08   |                                | na                | 1x10 <sup>4</sup>              | 35.00             |
| CFBP 8402 ( <i>pauca</i> )<br>+ CFBP 8416<br>( <i>multiplex</i> ) | 1x10 <sup>6</sup>                           | 25.91   |                                | na              | 5x10 <sup>5</sup>              | 26.46   |                                | 5x10 <sup>5</sup> | 25.81                          | 1x10 <sup>6</sup> |
|                                                                   | 1x10 <sup>6</sup>                           | 26.08   |                                | na              | 5x10 <sup>5</sup>              | 27.02   |                                | 5x10 <sup>5</sup> | 25.89                          | 1x10 <sup>4</sup> |
| <i>Polygala myrtifolia</i> <sup>b</sup>                           |                                             |         |                                |                 |                                |         |                                |                   |                                |                   |
| CFBP 7970 ( <i>fastidiosa</i> )                                   | 1x10 <sup>5</sup>                           | 26.94   | 1x10 <sup>4</sup>              | 29.98           |                                | na      |                                | na                | 1x10 <sup>3</sup>              | 37.47             |
|                                                                   | 1x10 <sup>5</sup>                           | 27.33   | 1x10 <sup>5</sup>              | 28.45           |                                | na      |                                | na                | 1x10 <sup>3</sup>              | 36.51             |
| CFBP 8084 ( <i>morus</i> )                                        | 1x10 <sup>3</sup>                           | 29.63   | 1x10 <sup>3</sup>              | 27.53           |                                | na      |                                | na                | 1x10 <sup>3</sup>              | 32.53             |

|                                                                                                     |                   |       |                      |       |                      |       |                      |       |                   |       |
|-----------------------------------------------------------------------------------------------------|-------------------|-------|----------------------|-------|----------------------|-------|----------------------|-------|-------------------|-------|
|                                                                                                     | 1x10 <sup>4</sup> | 29.77 | 1x10 <sup>4</sup>    | 29.46 |                      | na    |                      | na    | 1x10 <sup>3</sup> | 35.17 |
| CFBP 8402 ( <i>pauca</i> )                                                                          | 1x10 <sup>4</sup> | 27.64 |                      | na    |                      | na    | 1x10 <sup>4</sup>    | 26.32 | 1x10 <sup>3</sup> | 33.84 |
|                                                                                                     | 1x10 <sup>4</sup> | 29.99 |                      | na    |                      | na    | 1x10 <sup>4</sup>    | 25.74 | 1x10 <sup>3</sup> | 32.89 |
|                                                                                                     | 1x10 <sup>4</sup> | 29.62 |                      | na    | 1x10 <sup>4</sup>    | 28.29 |                      | na    | 1x10 <sup>3</sup> | 33.17 |
| CFBP 8416 ( <i>multiplex</i> )                                                                      | 1x10 <sup>5</sup> | 27.09 |                      | na    | 1x10 <sup>5</sup>    | 26.60 |                      | na    | 1x10 <sup>3</sup> | 36.67 |
|                                                                                                     | 1x10 <sup>5</sup> | 26.04 | 3.33x10 <sup>4</sup> | 35.87 | 3.33x10 <sup>4</sup> | 27.20 | 3.33x10 <sup>4</sup> | 25.34 | 1x10 <sup>3</sup> | 36.23 |
| CFBP 7970 ( <i>fastidiosa</i> )<br>+ CFBP 8402 ( <i>pauca</i> )<br>+ CFBP 8416 ( <i>multiplex</i> ) | 1x10 <sup>5</sup> | 26.45 | 3.33x10 <sup>5</sup> | 31.80 | 3.33x10 <sup>4</sup> | 27.10 | 3.33x10 <sup>4</sup> | 25.19 | 1x10 <sup>4</sup> | 33.36 |
| <hr/> <i>Prunus cerasus</i> <sup>b</sup>                                                            |                   |       |                      |       |                      |       |                      |       |                   |       |
| CFBP 7970 ( <i>fastidiosa</i> )                                                                     | 1x10 <sup>4</sup> | 31.08 | 1x10 <sup>4</sup>    | 35.46 |                      | na    |                      | na    | 1x10 <sup>3</sup> | 35.69 |
|                                                                                                     | 1x10 <sup>5</sup> | 27.46 | 1x10 <sup>5</sup>    | 33.38 |                      | na    |                      | na    | 1x10 <sup>5</sup> | 31.80 |
| CFBP 8416 ( <i>multiplex</i> )                                                                      | 1x10 <sup>5</sup> | 28.31 |                      | na    | 1x10 <sup>5</sup>    | 32.11 |                      | na    | 1x10 <sup>4</sup> | 36.42 |
|                                                                                                     | 1x10 <sup>6</sup> | 31.04 |                      | na    | 1x10 <sup>6</sup>    | 38.46 |                      | na    | 1x10 <sup>5</sup> | 34.41 |
| <hr/> <i>Prunus dulcis</i> <sup>b</sup>                                                             |                   |       |                      |       |                      |       |                      |       |                   |       |
| CFBP 7970 ( <i>fastidiosa</i> )                                                                     | 1x10 <sup>4</sup> | 29.77 | 1x10 <sup>4</sup>    | 32.74 |                      | na    |                      | na    | 1x10 <sup>4</sup> | 34.65 |
|                                                                                                     | 1x10 <sup>5</sup> | 28.23 | 1x10 <sup>4</sup>    | 33.61 |                      | na    |                      | na    | 1x10 <sup>3</sup> | 36.70 |
| CFBP 8402 ( <i>pauca</i> )                                                                          | 1x10 <sup>4</sup> | 31.15 |                      | na    |                      | na    | 1x10 <sup>4</sup>    | 29.87 | 1x10 <sup>4</sup> | 35.08 |
|                                                                                                     | 1x10 <sup>5</sup> | 27.73 |                      | na    |                      | na    | 1x10 <sup>4</sup>    | 29.13 | 1x10 <sup>4</sup> | 32.38 |
| CFBP 8416 ( <i>multiplex</i> )                                                                      | 1x10 <sup>5</sup> | 28.89 |                      | na    | 1x10 <sup>4</sup>    | 33.14 |                      | na    | 1x10 <sup>4</sup> | 37.17 |
|                                                                                                     | 1x10 <sup>5</sup> | 28.90 |                      | na    | 1x10 <sup>5</sup>    | 31.56 |                      | na    | 1x10 <sup>4</sup> | 35.71 |
| CFBP 7970 ( <i>fastidiosa</i> )<br>+ CFBP 8402 ( <i>pauca</i> )<br>+ CFBP 8416 ( <i>multiplex</i> ) | 1x10 <sup>5</sup> | 29.01 | 3.33x10 <sup>4</sup> | 33.61 | 3.33x10 <sup>4</sup> | 30.67 | 3.33x10 <sup>3</sup> | 28.19 | 1x10 <sup>4</sup> | 35.89 |
|                                                                                                     | 1x10 <sup>5</sup> | 27.68 | 3.33x10 <sup>4</sup> | 35.13 | 3.33x10 <sup>5</sup> | 27.51 | 3.33x10 <sup>4</sup> | 28.78 | 1x10 <sup>4</sup> | 35.71 |
| <hr/> <i>Quercus ilex</i>                                                                           |                   |       |                      |       |                      |       |                      |       |                   |       |
| CFBP 8416 ( <i>multiplex</i> )                                                                      | 1x10 <sup>4</sup> | 24.87 |                      | na    | 1x10 <sup>4</sup>    | 27.15 |                      | na    | 1x10 <sup>2</sup> | 36.26 |
|                                                                                                     | 1x10 <sup>5</sup> | 26.08 |                      | na    | 1x10 <sup>4</sup>    | 27.33 |                      | na    | 1x10 <sup>2</sup> | 36.72 |
| <hr/> <i>Quercus robur</i>                                                                          |                   |       |                      |       |                      |       |                      |       |                   |       |
| CFBP 8416 ( <i>multiplex</i> )                                                                      | 1x10 <sup>5</sup> | 26.44 |                      | na    | 1x10 <sup>4</sup>    | 28.07 |                      | na    | 1x10 <sup>3</sup> | 37.05 |
| <hr/> <i>Rosmarinus officinalis</i>                                                                 |                   |       |                      |       |                      |       |                      |       |                   |       |
| CFBP 8416 ( <i>multiplex</i> )                                                                      | 1x10 <sup>4</sup> | 29.31 |                      | na    | 1x10 <sup>4</sup>    | 27.38 |                      | na    | 1x10 <sup>3</sup> | 32.55 |
| <hr/> <i>Vitis vinifera</i> <sup>b</sup>                                                            |                   |       |                      |       |                      |       |                      |       |                   |       |
| CFBP 7970 ( <i>fastidiosa</i> )                                                                     | 1x10 <sup>3</sup> | 28.08 | 1x10 <sup>3</sup>    | 31.33 |                      | na    |                      | na    | 1x10 <sup>2</sup> | 37.65 |
|                                                                                                     | 1x10 <sup>5</sup> | 30.46 | 1x10 <sup>5</sup>    | 29.94 |                      | na    |                      | na    | 1x10 <sup>4</sup> | 35.78 |

|                                |                   |       |    |                   |       |    |                   |       |
|--------------------------------|-------------------|-------|----|-------------------|-------|----|-------------------|-------|
| CFBP 8416 ( <i>multiplex</i> ) | 1x10 <sup>3</sup> | 28.75 | na | 1x10 <sup>3</sup> | 30.66 | na | 1x10 <sup>3</sup> | 33.41 |
|                                | 1x10 <sup>5</sup> | 28.07 | na | 1x10 <sup>5</sup> | 28.07 | na | 1x10 <sup>4</sup> | 35.31 |

800 <sup>a</sup>: spiked concentration based on OD<sub>600nm</sub> = 0.1 corresponding to 1x10<sup>8</sup> CFU.ml<sup>-1</sup>

801 <sup>b</sup>: experiments were performed in triplicate and in two independent experiments.

802 <sup>c</sup>: not amplified

803

804  
805

**Table 6: Detection of *X. fastidiosa* in environmental plant samples with low population sizes using the tetraplex qPCR assay set n° 1 in comparison with the reference test (Harper's test, Harper et al., 2010).**

| Sample | Host plant                    | Place (year)                 | Mean Ct (SEM) <sup>a</sup> |              |              |     | Harper's test | typing                                       |
|--------|-------------------------------|------------------------------|----------------------------|--------------|--------------|-----|---------------|----------------------------------------------|
|        |                               |                              | XF                         | XFFSL        | XFM          | XFP |               |                                              |
| 1      | <i>Centranthus trinervis</i>  | Bonifaccio, France (2017)    | na <sup>b</sup>            | 33.67 (1.42) | na           | na  | 34.97 (0.53)  | unknown                                      |
| 2      | <i>Helichrysum italicum</i>   | Propriano, France (2017)     | 27.35 (0.67)               | na           | 27.25 (0.23) | na  | 30.85 (0.04)  | unknown                                      |
| 3      | <i>Lavandula stoechas</i>     | Vignola, France (2017)       | 30.75 (0.73)               | na           | 26.27 (0.38) | na  | 29.50 (0.13)  | unknown                                      |
| 4      | <i>Lavandula stoechas</i>     | Propriano, France (2017)     | na                         | na           | na           | na  | 34.81 (1.40)  | unknown                                      |
| 5      | <i>Olea europaea</i>          | Afa, France (2017)           | na                         | na           | na           | na  | 34.01 (0.77)  | unknown                                      |
| 6      | <i>Olea europaea</i>          | Vignola, France (2017)       | na                         | 29.91 (0.80) | na           | na  | 32.94 (0.18)  | unknown                                      |
| 7      | <i>Phyllirea angustifolia</i> | Bonifaccio, France (2017)    | na                         | 30.52 (0.21) | na           | na  | 33.99 (1.09)  | unknown                                      |
| 8      | <i>Polygala myrtifolia</i>    | Vignola, France (2017)       | 24.86 (0.04)               | na           | 25.00 (0.03) | na  | 25.96 (0.04)  | suspected <i>Xfm</i> <sup>c</sup><br>leuA: 3 |
| 9      | <i>Polygala myrtifolia</i>    | Porto-Vecchio, France (2018) | 30.14 (0.58)               | na           | 29.52 (0.17) | na  | 32.82 (0.41)  | unknown                                      |
| 10     | <i>Spartium junceum</i>       | Corbara, France (2017)       | 23.68 (0.17)               | na           | 23.97 (0.14) | na  | 24.97 (0.06)  | unknown                                      |

806 <sup>a</sup>: none of these test was performed by the French national reference laboratory

807 <sup>b</sup>:not amplified

808 <sup>c</sup>: typing is suspected when the seven housekeeping genes could not be amplified

809  
810

**Table 7: Detection of *X. fastidiosa* in inoculated plants using the tetraplex qPCR assay (set n° 1) in comparison with the reference test (Harper's test, Harper et al., 2010).**

| Sample | Host plant                              | Spiked strain (subsp.)          | Mean Ct (SEM) |              |              |     | Harper's test |
|--------|-----------------------------------------|---------------------------------|---------------|--------------|--------------|-----|---------------|
|        |                                         |                                 | XF            | XFFSL        | XFM          | XFP |               |
| 10     | <i>Olea europaea</i> cv Capanaccia      | CFBP 7970 ( <i>fastidiosa</i> ) | na            | 26.57 (0.09) | na           | na  | 28.90 (0.04)  |
| 11     | <i>Prunus armeniaca</i> var Bergeron    | CFBP 7970 ( <i>fastidiosa</i> ) | 24.65 (1.79)  | 26.14 (1.66) | na           | na  | 28.33 (0.63)  |
| 12     | <i>Vitis vinifera</i> cv Chardonnay     | CFBP 7970 ( <i>fastidiosa</i> ) | na            | 24.20 (0.04) | na           | na  | 27.86 (0.61)  |
| 13     | <i>Vitis vinifera</i> cv Chardonnay     | CFBP 8077 ( <i>sandyi</i> )     | 20.04 (0.26)  | 21.78 (0.28) | na           | na  | 23.81 (0.07)  |
| 14     | <i>Prunus armeniaca</i> var Bergeron    | CFBP 8418 ( <i>multiplex</i> )  | na            | na           | 28.83 (0.31) | na  | 31.92 (0.09)  |
| 15     | <i>Olea europaea</i> cv Sabine          | CFBP 8416 ( <i>multiplex</i> )  | na            | na           | 23.21 (0.24) | na  | 27.84 (0.12)  |
| 16     | <i>Olea europaea</i> cv Sabine          | CFBP 8416 ( <i>multiplex</i> )  | 23.71 (2.08)  | na           | 23.68 (0.70) | na  | 25.92 (0.04)  |
| 17     | <i>Vitis vinifera</i> cv Cabernet Franc | CFBP 8416 ( <i>multiplex</i> )  | 19.49 (1.25)  | na           | 21.01 (0.64) | na  | 23.19 (0.07)  |

|    |                                            |                            |              |    |    |              |              |
|----|--------------------------------------------|----------------------------|--------------|----|----|--------------|--------------|
| 18 | <i>Olea europaea</i> cv Aglandau           | CFBP 8402 ( <i>pauca</i> ) | 23.66 (0.14) | na | na | 23.75 (0.06) | 25.86 (0.02) |
| 19 | <i>Vitis vinifera</i> cv<br>Cabernet Franc | CFBP 8402 ( <i>pauca</i> ) | 20.62 (0.21) | na | na | 21.26 (0.13) | 23.50 (0.06) |

---

811
