## Title: Novel tetraplex qPCR assays for simultaneous detection and identification of *Xylella fastidiosa* subspecies in plant tissues.

1 Dupas Enora<sup>1,2</sup>, Briand Martial<sup>1</sup>, Jacques Marie-Agnès<sup>1\*</sup>, Cesbron Sophie<sup>1\*</sup>

2 <sup>1</sup> IRHS, Agrocampus-Ouest, INRA, University of Angers, SFR 4207 QuaSaV, 49071, Beaucouzé,  
3 France

4 <sup>2</sup> French Agency for Food, Environmental and Occupational Health & Safety, Plant Health Laboratory,  
5 Angers, France

6 \* **Correspondance:**

7 Sophie Cesbron

8 [sophie.cesbron@inra.fr](mailto:sophie.cesbron@inra.fr)

9 Marie-Agnès Jacques

10 [marie-agnes.jacques@inra.fr](mailto:marie-agnes.jacques@inra.fr)

11

12 **Keywords: real-time PCR, TaqMan, subspecies differentiation, diagnostic, SkIf, multiplexing.**

13 Running title: *in planta* identification of *Xylella fastidiosa* subspecies

14 **Abstract**

15 *Xylella fastidiosa* is an insect-borne bacterium confined to the xylem vessels of plants. This plant  
16 pathogen has a broad host range estimated to 560 plant species. Five subspecies of the pathogen with  
17 different but overlapping host ranges have been described, but only three subspecies are widely  
18 accepted, namely subspecies *fastidiosa*, *multiplex* and *pauca*. Initially limited to the Americas, *Xf* has  
19 been detected in Europe since 2013. As management of *X. fastidiosa* outbreaks in Europe depends on  
20 the identification of the subspecies, accurate determination of the subspecies in infected plants as early  
21 as possible is of major interest. Thus, we developed various tetraplex and triplex qPCR assays for  
22 *Xylella fastidiosa* detection and subspecies identification *in planta* in a single reaction. We designed  
23 primers and probes using SkIf, a bioinformatics tool based on *k*-mers, to detect specific signatures of  
24 the species and subspecies from a dataset of 58 genome sequences representative of *X. fastidiosa*  
25 diversity. We tested the qPCR assays on 39 target and 30 non-target strains, as well as on 13 different  
26 plant species spiked with strains of the different subspecies of *X. fastidiosa*, and on samples from  
27 various environmental and inoculated host plants. Sensitivity of simplex assays was equal or slightly  
28 better than the reference protocol on purified DNA. Tetraplex qPCR assays had the same sensitivity  
29 than the reference protocol and allowed *X. fastidiosa* detection in all spiked matrices up to 10<sup>3</sup> cells.mL<sup>-1</sup>.  
30 <sup>1</sup>. Moreover, mix infections of two to three subspecies could be detected in the same sample with  
31 tetraplex assays. In environmental plant samples, the tetraplex qPCR assays allowed subspecies  
32 identification when the current method based on multilocus sequence typing failed. The qPCR assays  
33 described here are robust and modular tools that are efficient for differentiating *X. fastidiosa* subspecies  
34 directly in plant samples.

## *in planta* identification of *Xylella fastidiosa* subspecies

### 35 1 Introduction

36 *Xylella fastidiosa* (*Xf*) is a worldwide insect-transmitted plant pathogenic bacterium that presents a very  
37 large host range. Altogether, 563 plant species grouped into 82 botanical families have been reported  
38 as *Xf* hosts (EFSA, 2018a). Plants with a major socio-economic interest such as grapevine, citrus,  
39 coffee, and olive trees are hosts of *Xf* (EFSA, 2018a). Forest trees, shade trees, ornamentals and  
40 landscape species are included in the host plant database making this pathogen a potential worldwide  
41 threat (EFSA, 2018a). Disease management of *Xf* is impeded by its asymptomatic period that can last  
42 several years (EFSA, 2018b).

43 This bacterial species is genetically diverse as five subspecies including *fastidiosa*, *morus*, *multiplex*,  
44 *pauca* and *sandyi* are currently described (EFSA, 2018b). Although this subspecies delineation was  
45 initially associated to *Xf* host range and places of occurrence, more and more observations report  
46 infection of a given host by various subspecies (Denancé et al., 2017; EPPO, 2018b; Denancé et al.,  
47 2019; Nunney et al., 2019). Homologous recombination events were detected in *Xf* and were suspected  
48 to be associated with host-shift, as documented for the subspecies *morus* (Nunney et al., 2014). But  
49 intrasubspecific homologous recombination events could be more frequent than intersubspecific events  
50 (Potnis et al., 2019). Based on genome sequence analyses, it was proposed to merge the subspecies  
51 *fastidiosa*, *morus* and *sandyi* in the subspecies *fastidiosa* (hereafter referred to *Xff sensu lato* (*Xffsl*) to  
52 avoid confusion with classical *Xff*), the subspecies *multiplex* and *pauca* remaining coherent groups and  
53 distantly related from *Xff* (Marcelletti and Scortichini, 2016; Denancé et al., 2019). The method  
54 generally used to identify strains at the subspecies level is based on the sequencing of seven  
55 housekeeping genes (*cysG*, *gltT*, *holC*, *leuA*, *malF*, *nuoL* and *petC*) of the dedicated MultiLocus  
56 Sequence Typing (MLST) scheme (Yuan et al., 2010).

57 In Europe, *Xf* has been reported for the first time in Apulia area, Italy, in olive trees (Saponari et al.,  
58 2013). Then, *Xf* was detected in 2015 in France, more precisely in Corsica and in the French Riviera  
59 region, mainly on *Polygala myrtifolia* and other ornamentals (Denancé et al., 2017). Two years later,  
60 *Xf* has been reported in the Balearic Islands mostly in olive tree, grapevine and sweet cherry and in  
61 continental Spain in almond trees (Landa, 2017). More recently, in October 2018, the presence of  
62 *X. fastidiosa* subsp. *multiplex* was reported in Monte Argentario (Tuscany, Italy), and in January 2019  
63 the subsp. *multiplex* was identified in Portugal (region of Porto), and both reports concerned  
64 ornamentals (EPPO, 2019). Since the first report, four subspecies, *fastidiosa*, *multiplex*, *pauca* and  
65 *sandyi* have been identified in Europe (Jacques et al., 2016; Denancé et al., 2017; Cruaud et al., 2018).  
66 A number of cases of imported plants being infected by *Xf* has also been reported in Europe since 2012  
67 (EPPO, 2019). Being present in Europe, *Xf* was first listed as an A1 regulated pathogen. *Xf* is now  
68 reported in the Annex I/A2 of the directive 2000/29/CE and in the EPPO A2 list (C/2017/4883, 2017;  
69 EPPO, 2018a).

70 Apart the sympatry of several subspecies at the local, regional or state level, cases of mix infection of  
71 plants have been described. In 2005 in California, an almond tree has been reported infected by two  
72 types of *Xf* strains, revealing the first case of mix infection by *Xf* (Chen et al., 2005). Recently, in coffee  
73 trees imported into Europe from Central America, the MLST revealed a mix infection with two  
74 different sequence types (STs) of *Xf* from two subspecies: *pauca* and *fastidiosa* (Bergsma-Vlami et al.,  
75 2017). In France, a *Polygala myrtifolia* plant was found mix infected with strains of two different STs  
76 (Denancé et al., 2017). Reported cases of undetermined sequences of housekeeping gene alleles was  
77 an indication of mix infections in plants (Denancé et al., 2017).

## *in planta* identification of *Xylella fastidiosa* subspecies

78 Because in Europe the subspecies identification is necessary to set up outbreak management, it is of  
79 major interest to have access to reliable tools for the detection and identification of *Xf*. As *Xf* isolation  
80 is tedious, detection and identification of subspecies are performed directly on plant extracts (Denancé  
81 *et al.*, 2017). To date, tests based on loop-mediated isothermal amplification (LAMP) (Harper *et al.*,  
82 2010), conventional PCR (Minsavage *et al.*, 1994; Hernandez-Martinez *et al.*, 2006), and quantitative  
83 PCR (qPCR) (Francis *et al.*, 2006; Harper *et al.*, 2010; Li *et al.*, 2013; Ouyang *et al.*, 2013) targeting  
84 specific regions at the species or subspecies level are available. Among these tests, the qPCR assay  
85 developed by Harper *et al.* (2010) has been identified as one of the most appropriate for the detection  
86 of *Xf*, as it has shown a high diagnostic sensitivity compared to others qPCR assays, detects all  
87 subspecies, has no cross-reactivity with any other bacterial species and has been successfully used on  
88 a wide range of plants (Modesti *et al.*, 2017; Reisenzein, 2017). Several tests have been proposed to  
89 identify one or more subspecies but no test is currently available to identify all subspecies. The  
90 subspecies identification is then routinely performed by MLST, but this method while accurate and  
91 portable is time consuming, labor intensive and expensive. From 2018, sequences of only two  
92 housekeeping genes (*rpoD* and *cysG* or *rpoD* and *malF*) are required for subspecies identification in  
93 France, while other sets of gene pairs are recommended by EPPO (EPPO, 2018b).

94 In recent years, multiplexed Taqman qPCR has become a useful tool for the identification and  
95 quantification of pathogens in different areas such as food safety (Köppel *et al.*, 2019; Wei *et al.*, 2019),  
96 medical environment (Janse *et al.*, 2013; Kamau *et al.*, 2013), agronomics (Wei *et al.*, 2008; Zitnick-  
97 Anderson *et al.*, 2018), GMO detection (Choi *et al.*, 2018; Wang *et al.*, 2018), and the environment  
98 (Hulley *et al.*, 2019). For plant pathogens these methods have been tested on samples of naturally  
99 infected plants, spiked samples (Li *et al.*, 2009; Willsey *et al.*, 2018), and on mixtures of plant and  
100 pathogen DNAs (Abraham *et al.*, 2018). *Xf*-specific multiplexed qPCR assays have already been  
101 developed based on the combination of primers designed by Harper *et al.* (2010) and Ouyang *et al.*  
102 (2013) (Bonants *et al.*, 2018). Other tests were proposed to differentiate *Xf* from phytoplasmas sharing  
103 common host plants (Ito and Suzaki, 2017) and to differentiate the subspecies *fastidiosa* from the  
104 subspecies *multiplex* (Burbank and Ortega, 2018). However, none of them allows the differential  
105 identification of all *Xf* subspecies.

106 In this study, we described the development and evaluation of six multiplex qPCR assays for the  
107 detection and identification of *Xf* subspecies. These tests have been designed and tested *in silico* on a  
108 wide range of target and non-target genomic sequences, *in vitro* on target and non-target bacterial  
109 strains, on *Xf*-spiked plant extracts, and finally *in planta* on samples from environmental or inoculated  
110 plants. These assays allowed the detection of *Xf* subspecies up to 10 pg.mL<sup>-1</sup> of DNA, 1x10<sup>3</sup> CFU.mL<sup>-1</sup>  
111 in spiked samples and allow the identification of *Xf* subspecies in environmental plant samples that  
112 cannot be typed using MLST. These multiplex qPCR assays offer a new, faster, more reliable, more  
113 specific, more sensitive, and less expensive tool than MLST.

## 114 2 Materials and methods

### 115 2.1 Bacterial strains and growth conditions

116 Collections of 39 strains representing the different *Xf* subspecies, 28 strains from other plant-  
117 pathogenic bacterium genera (*Agrobacterium*, *Clavibacter*, *Dickeya*, *Erwinia*, *Pantoea*, *Pseudomonas*,  
118 *Stenotrophomonas*, *Xanthomonas* and *Xylophilus*), and two strains from plant endosymbionts (*Ensifer*  
119 and *Rhizobium*) were used (Table 1). A set of 12 *Xf* strains of the subsp. *multiplex* and one strain of the  
120 subsp. *sandyi* were kindly provided by Leonardo De la Fuente (Auburn University, AL, USA). The  
121 other 57 strains were provided by the French Collection of Plant-Associated Bacteria (CIRM-CFBP;

## *in planta* identification of *Xylella fastidiosa* subspecies

122 [https://www6.inra.fr/cirm\\_eng/CFBP-Plant-Associated-Bacteria](https://www6.inra.fr/cirm_eng/CFBP-Plant-Associated-Bacteria)). *Xf* strains were grown on BCYE  
123 (Wells *et al.*, 1981) or modified PWG media (agar 12 g.L<sup>-1</sup>; soytone 4 g.L<sup>-1</sup>; bacto tryptone 1 g.L<sup>-1</sup>;  
124 MgSO<sub>4</sub>.7H<sub>2</sub>O 0,4 g.L<sup>-1</sup>; K<sub>2</sub>HPO<sub>4</sub> 1.2 g.L<sup>-1</sup>; KH<sub>2</sub>PO<sub>4</sub> 1 g.L<sup>-1</sup>; hemin chloride (0.1% in NaOH 0.05  
125 M) 10 ml.L<sup>-1</sup>; BSA (7.5%) 24 ml.L<sup>-1</sup>; L-glutamine 4 g.L<sup>-1</sup>) at 28°C for one to two weeks. Other strains  
126 were grown at 25°C for one to two days on: MG media (Mougel *et al.*, 2001) for *Agrobacterium* and  
127 *Rhizobium*, TSA (tryptone soy broth 30 g.L<sup>-1</sup>; agar 15 g.L<sup>-1</sup>) for *Clavibacter*, *Ensifer*,  
128 *Stenotrophomonas*, *Xanthomonas* and *Xylophilus* and King's B medium (KH<sub>2</sub>PO<sub>4</sub> 1.5 g.L<sup>-1</sup>; MgSO<sub>4</sub>,  
129 7H<sub>2</sub>O 1.5 g.L<sup>-1</sup>; protease peptone 20 g.L<sup>-1</sup>, glycerol 10 mL.L<sup>-1</sup>; agar 15 g.L<sup>-1</sup>) for *Dickeya*, *Erwinia*,  
130 *Pantoea* and *Pseudomonas*. For qPCR assays, bacterial suspensions were prepared from fresh cultures  
131 in sterile distilled water, adjusted at OD<sub>600 nm</sub> = 0.1. To evaluate assay specificity bacterial suspensions  
132 were boiled for 20 min, followed by a thermal shock on ice and a centrifugation at 10,000 g during 10  
133 min.

### 134 2.2 Plant material

135 Petioles or midribs were collected in 2018 from healthy plants of 13 species (*Helichrysum italicum*,  
136 *Lavandula angustifolia*, *Nerium oleander*, *Olea europaea*, *Prunus cerasus*, *Prunus dulcis*, *Quercus*  
137 *ilex*, *Quercus robur* and *Rosmarinus officinalis*) growing in orchards adjacent to INRA center or  
138 purchased in nurseries (*Vitis vinifera*, *Citrus clementina* and *Polygala myrtifolia*). These species are  
139 either not known to be host of *Xf* in France or were sampled in *Xf*-free areas. Symptomless *Cistus*  
140 *monspeliensis* plant material was collected in Corsica outside any recorded *Xf*-focus by the National  
141 Botanical Conservatory of Corsica (CNBC).

142 Plants were collected in June 2017 and in October 2018 in Corsica, France, based on symptoms and  
143 were pre-tested using a modified extraction procedure based on CTAB and/or QuickPick™ SML  
144 Plant DNA Kit (Bio-Nobile, Turku, Finland) as described in PM7/24 (EPPO, 2018b). Samples were  
145 first finely chopped and then sonicated (1 min, 42KHz) in a Branson apparatus. A 15 min incubation  
146 step at room temperature was performed before DNA extraction. The frozen DNA solutions of 20  
147 greenhouse inoculated plant materials were used to evaluate the multiplex qPCR assays.

### 148 2.3 Production of inoculated plants

149 *X. fastidiosa* strains CFBP 7970 (*Xff*), CFBP 8077 (*Xfs*), CFBP 8402 (*Xfp*), CFBP 8416 (*Xfm*) and  
150 CFBP 8418 (*Xfm*) were inoculated in six month-old grafted plants of *Vitis vinifera* cv Chardonnay,  
151 *Vitis vinifera* cv Cabernet Franc, in 1.5 years-old grafted plants of *Prunus armeniaca* var Bergeron,  
152 *Olea europaea* cv Aglandau, *Olea europaea* cv Capanaccia, and *Olea europaea* cv Sabine. Plants were  
153 grown in a confined growth chamber at 24°C with 16 h of daylight and at 20°C during night, under  
154 70% relative humidity. Plants were watered daily with water supplemented with 1.4 g.L<sup>-1</sup>  
155 nitrogen:phosphorus:potassium fertilizer (16:8:32). Plants were inoculated by the needle puncture  
156 method. A 10 µL drop of inoculum calibrated at OD<sub>600nm</sub> = 0.5 was placed on the node of a growing  
157 young stem and punctured with a needle. After six months for vines and apricot trees, and one year for  
158 olive trees, samples at the inoculation point were tested by the Harper's qPCR test and typed using the  
159 classical *Xf* MLST scheme as described in Denancé *et al.* (2017). The samples were stored at -20°C  
160 before being analyzed. Plant inoculations were carried out under quarantine at IRHS, Centre INRA,  
161 Beaucouzé, France under the agreement no. 2013119-0002 from the Prefecture de la Région Pays de  
162 la Loire, France.

### 163 2.4 Spiking of samples and DNA extraction

## *in planta* identification of *Xylella fastidiosa* subspecies

164 Prior to DNA extraction, plant samples were inoculated by mixing 1 g of healthy plant material with  
165 0.5 mL of a bacterial suspension, at a known concentration, and ground with 4.5 mL of sterile distilled  
166 water. Each matrix was spiked in order to end up with concentrations ranging from  $1 \times 10^6$  CFU.mL<sup>-1</sup>  
167 to 10 CFU.mL<sup>-1</sup>. Spiking with more than one strain was done in equal amounts to end up with final  
168 concentrations ranging from  $1 \times 10^6$  CFU.mL<sup>-1</sup> to  $1 \times 10$  CFU.mL<sup>-1</sup>. Samples from *P. myrtifolia* were  
169 spiked with individual strains representing each subspecies of *Xf* (*Xff*: CFBP 7970, *Xfmo*: CFBP 8084,  
170 *Xfp*: CFBP 8402, *Xfm*: CFBP 8416). Other plant materials were spiked with the strain representing the  
171 only subspecies that infects them naturally. However, as several subspecies may co-occur in a same  
172 area and plant species may be hosts of several subspecies, samples of *N. oleander*, *O. europaea*,  
173 *P. dulcis*, and *P. myrtifolia* were also spiked with duos or trios of strains. A total of 29 plant species -  
174 *Xf* subspecies were combined. For negative controls, the samples were directly ground in sterile  
175 distilled water (5 mL). Samples were treated as above before DNA extraction. All DNA extractions  
176 were performed using the QuickPick™ SML Plant DNA Kit (Bio-Nobile, Turku, Finland) as in  
177 PM7/24 (EPPO, 2018b) with an automated system (Caliper Zephyr, PerkinElmer). A control composed  
178 of DNAs extracted from bacterial suspensions were systematically performed.

### 179 2.5 Relationships between DNA concentration, OD<sub>600nm</sub> and bacterial concentration

180 Fresh suspensions of CFBP 7970 strain calibrated at OD<sub>600 nm</sub> = 0.1 were plated on PWG medium and  
181 incubated at 28°C for 8 days before counting. They contained  $1 \times 10^8$  CFU.mL<sup>-1</sup>. Genomic DNA from  
182 the same suspensions was extracted using QuickPick™ SML Plant DNA Kit (Bio-Nobile, Turku,  
183 Finland) as described in PM7/24 (EPPO, 2018b). DNA concentration was measured using Qubit  
184 fluorimeter and serial dilutions of *Xf* genomic DNA at concentrations ranging from 1 µg.mL<sup>-1</sup> to 1  
185 pg.mL<sup>-1</sup> were prepared. The DNA was amplified using the Harper's *et al.* (2010) qPCR assay in a Bio-  
186 Rad CFX384 thermocycler. Results of the amplified serial dilutions were used to establish standard  
187 curves relating the amount of fluorescence to the amount of DNA. The bacterial concentration of the  
188 corresponding DNA solution was calculated based on DNA measures using an estimated genome size  
189 of 2,493,794 bp for the strain CFBP 7970 (Denancé *et al.*, 2017) and knowing that 1 pg =  $9.78 \times 10^8$  bp  
190 (Doležel *et al.*, 2003). Using the following equation curve ( $y = 2.10^{10 \exp(-0.567x)}$ , R<sup>2</sup> = 0.999) a  
191 Ct = 19.8 correlated to  $1.04 \times 10^8$  genome equivalent.mL<sup>-1</sup>.

### 192 2.6 Gene target selection and primers design

193 SkIf tool (Briand *et al.*, 2016) was used on 58 *Xylella* genomic sequences to target specific sequences  
194 of the *Xf* species, each subspecies, and the *fastidiosa sensu lato* (*Xffsl*) subspecies, i.e. the group  
195 including the *fastidiosa*, *morus* and *sandyi* subspecies (Denancé *et al.*, 2019) (Table 2). Six primer and  
196 probe combinations were designed using Primer3 2.3.4 (Koressaar and Remm, 2007), on these specific  
197 sequences to target the whole *Xf* species (XF primers), and the various subspecies : *fastidiosa* (XFF  
198 primers), *fastidiosa sensu lato* (XFFSL primers), *morus* (XMO primers), *multiplex* (XFM primers) and  
199 *pauca* (XFP primers) (Table 3). The parameters were set up with an optimal size of 20 bp (sizing  
200 between 18-27 bp), an optimal product size of 85 to 150 bp; a Tm of 60°C (± 3°C) and 70°C (± 3°C)  
201 for primers and probes, respectively. Then, the individual primer and probe combinations and the six  
202 sets of four combinations were tested using Amplify to check the absence of dimer and cross-  
203 amplification (Engels, 1993). The specificity of all primers and probes was tested *in silico* using  
204 PrimerSearch (Val Curwen, Human Genome Mapping Project, Cambridge, UK) on the initial set of 58  
205 genomic sequences of *Xylella* and on the 154,478 bacterial Whole Genome Shotgun (WGS) sequences  
206 available in the NCBI database (as on August 22, 2018). BLASTn of the amplicons were run on the  
207 NCBI WGS database to evidence their specificity.

## *in planta* identification of *Xylella fastidiosa* subspecies

208 Four others primer and probe combinations previously published were used in this study. The first  
209 targets the *rimM* gene of *Xf* (Harper *et al.*, 2010) and was used as reference protocol. The second targets  
210 the eukaryotic *rRNA18S* gene (Ioos *et al.*, 2012) and was used as internal control. The remaining two  
211 tests target *fastidiosa* or *multiplex* subspecies (Burbank and Ortega, 2018).

### 212 **2.7 Optimization of qPCR assays and tetraplexing**

213 The tetraplex qPCR assays designed in this study were optimized for: i) primer and probe hybridization  
214 temperature that was checked individually by PCR using a gradient ranging from 57.5 to 61.4°C in  
215 intervals of 0.8°C (CFX96 Touch™ Bio-Rad), ii) concentrations of 250 nM, 575 nM or 900 nM for  
216 primers combined with 150 nM, 200 nM or 250 nM for probes according to PCR mix manufacturer  
217 instructions, and iii) addition of 600 ng.µl<sup>-1</sup> of BSA. All the optimization analyses were performed in  
218 triplicates using SsoAdvanced™ Universal Probes Supermix (Bio-Rad) and performed in a Bio-Rad  
219 CFX thermocycler using the “all channels” reading mode. To allow simultaneous detection of *Xf* and  
220 identification at the subspecies level, primer and probe combinations were then declined in six different  
221 triplex and tetraplex qPCR sets, *i.e.* set n°1: XF-XFFSL-XFM-XFP, set n°2: XF-XFF-XFM-XFP, set  
222 n°3: XF-XFF-XFM-XMO, set n°4: XFFSL-XFM-XFP, set n°5: Harper-XFFSL-XFM-XFP and set  
223 n°6: 18S-XFFSL-XFM-XFP.

224 The optimized final reaction conditions were performed in a final volume of 10 µL containing 1X of  
225 SsoAdvanced™ Universal Probes Supermix (Bio-Rad), 575 nM of primers, 200 nM of probes and 600  
226 ng.µl<sup>-1</sup> of BSA (ThermoFisher) and 1 µL of extracted DNA. The optimal thermocycling conditions  
227 selected were: 3 min at 95°C, followed by 40 cycles of 15 s at 95°C and 30 s at 60°C. The qPCR assays  
228 results were analyzed, with expert verification, using Bio-Rad CFX Manager 3.1 software and its  
229 regression mode. The reaction efficiency was calculated using serial dilutions with the formula:  $E =$   
230  $10^{(-1/\text{slope})}$ .

### 231 **2.8 qPCR assay specificity, efficiency and limit of detection**

232 The specificity of the newly designed primer and probe combinations was validated using the  
233 optimized protocol on the boiled bacterial suspensions of the 69 strains listed in the Table 1. The  
234 efficiency of each combination was evaluated on bacterial DNA solutions ranging from 1 µg.mL<sup>-1</sup> to  
235 1 pg.mL<sup>-1</sup>, in simplex or tetraplex assays (set n°1 to 3), on the strains CFBP 7970 (*Xff*) for the primers  
236 XF, XFF and XFFSL, CFBP 8416 (*Xfm*) for the primers XF and XFM, CFBP 8084 (*Xfmo*) for the  
237 primers XF and XFMO, and CFBP 8402 (*Xfp*) for the primers XF and XFP. In addition, each set was  
238 also evaluated with spiked plant material. All analyses were performed in triplicate. Two independent  
239 experiments were carried out on *O. europaea*, *P. myrtifolia*, *P. cerasus*, *P. dulcis* *Q. ilex* and *V. vinifera*  
240 using the set n°1: XF – XFFSL – XFM – XFP, leading to the analysis of 46 combinations of  
241 plant/strain(s) for this set. The assays were also performed on environmental plant samples and  
242 inoculated plant samples. For plant samples, the lowest concentration with a positive result in at least  
243 two out of the three replicates was considered the limit of detection (LOD).

244 The LOD of the tetraplex qPCR assays sets n°1 to 3 was compared to the Harper’s qPCR detection test  
245 (Harper *et al.*, 2010) using the TaqMan™ Universal PCR Master Mix (Applied Biosystems) as in  
246 PM7/24 (EPPO, 2018b). The LOD of the tetraplex qPCR assay set n°1 was compared to the ones of  
247 sets n°4, 5 and 6. The specificity of the qPCR assay recently proposed by Burbank and Ortega (2018)  
248 was also evaluated on the *Xf* strain collection using the SsoAdvanced™ Universal Probes Supermix  
249 (Bio-Rad) master mix.

## *in planta* identification of *Xylella fastidiosa* subspecies

### 250 3 Results

#### 251 3.1 Design of primers and probes and *in silico* analysis

252 Species-specific and subspecies-specific long-mers were identified with SkIf (Briand *et al.*, 2016;  
253 Denancé *et al.*, 2019) on genomic sequences. For the *Xf* species and the subspecies *fastidiosa*, *morus*,  
254 *multiplex*, and *pauca*, one of the two longest long-mers identified by Denancé *et al.* (2019) was selected  
255 for this study (Table 2). For the subspecies *fastidiosa sl* specific long-mers were searched for on our  
256 58 genome sequences of *Xf*, using the subspecies *fastidiosa*, *morus* and *sandyi* genomes as ingroups  
257 and the *multiplex* and *pauca* genomes as outgroups. In total, 3,345 long-mers were identified, ranging  
258 from 22 bp to 235 bp (Supplemental data 1).

259 Primers and probes were designed within specific long-mers (Table 3). Specific amplifications were  
260 obtained *in silico* on XF genome sequences and WGS bacterial sequences from NCBI at the expected  
261 amplification size, without any mismatch for the five primer and probe combinations (XFF, XFFSL,  
262 XFM, XFMO and XFP). Only two mismatches were observed and concerned the XF primer and probe  
263 combination. One mismatch was on the eighth nucleotide on the XF probe for the *Xfm* Dixon, Griffin1,  
264 M12, Sycamore, CFBP 8416, CFBP 8417, CFBP 8418 strains and the second one was on the sixth  
265 nucleotide of the forward XF primer of the Ann-1 *Xfs* strain. As there were not many possible  
266 combinations of primers and probes for the XF set, this combination was nevertheless retained, and  
267 subsequent *in silico* checks proved the specificity of all primer and probe combinations.

#### 268 3.2 Specificity and sensitivity of simplex and tetraplex qPCR assays on strains

269 The specificity of each newly designed primer and probe combination was validated in simplex qPCR  
270 assays on 39 *Xf* strains and on 30 plant associated-bacterial strains (Table 1). These strains were  
271 selected as they potentially share the same niche than *Xf* or for being phylogenetically closely related.  
272 No amplification was detected on non-target strains or healthy host plant species and the primer and  
273 probe combinations allowed amplification of all strains or subspecies of *Xf*, for which they were  
274 designed (XF: 39/39, XFF: 10/10, XFM: 16/16, XFMO: 1/1, XFP: 7/7, XFFSL: 16/16).

275 In simplex qPCR assays, the LODs of the new primer and probe combinations designed in this study  
276 were as good as the LODs obtained with the Harper's qPCR assay or 10 times better for XFM primers  
277 (Table 4). The efficiency of each combination was evaluated on serial dilutions of calibrated DNA  
278 solutions. The XF, XFM, XFMO, XFP, and XFFSL primers and probes allowed detection of *Xf* up to  
279 10 pg.mL<sup>-1</sup> (4 copies/reaction). XFF primers were slightly less sensitive with a threshold up to 100  
280 pg.mL<sup>-1</sup> (40 copies/reaction). On the same DNA solutions, Harper *et al.* (2010) qPCR assay allowed  
281 the detection of strains CFBP 8402 (*Xfp*) and CFBP 8084 (*Xfmo*) up to 10 pg.mL<sup>-1</sup>, and CFBP 7970  
282 (*Xff*) and CFBP 8416 (*Xfm*) strain up to 100 pg.mL<sup>-1</sup>. This makes our new primer qPCR assays good  
283 alternatives to Harper's qPCR assay.

284 The three tetraplex qPCR assays (set n°1: XF – XFFSL – XFM – XFP, set n°2: XF – XFF – XFM –  
285 XFP and set n°3: XF – XFF – XFM – XFMO) allowed both detection and identification of *Xf* and its  
286 subspecies (Supplemental data 2). On calibrated DNA solutions these assays were as good as Harper's  
287 test or had a LOD 10 times higher depending of the tetraplex assays. When used in tetraplex the Ct  
288 values obtained were always lower than the Ct values obtained with Harper's test. Except for *morus*  
289 primers (XFMO) the LOD of tetraplex qPCR assays was usually 10 times higher than the LOD of the  
290 simplex test on DNA (Table 4 and Supplemental data 2). In addition, it should be noted that the closer  
291 the Ct value was to the detection limit, the higher the SEM was. In tetraplex qPCR assays set n°1, XF,

## *in planta* identification of *Xylella fastidiosa* subspecies

292 XFM and XFP primers allowed a detection up to 100 pg.mL<sup>-1</sup>. The XFFSL primers allowed the  
293 detection of *Xff* up to 10 pg.mL<sup>-1</sup> and of *Xfmo* up to 100 pg.mL<sup>-1</sup>. The set n°2 allowed detection up to  
294 100 pg.mL<sup>-1</sup> using XFF and XFM primers and up to 10 pg.mL<sup>-1</sup> with XFP primers. The XF primers  
295 allowed the detection of *Xff* and *Xfm* up to 100 pg.mL<sup>-1</sup> and of *Xfp* up to 10 pg.mL<sup>-1</sup>. The set n°3,  
296 allowed a detection up to 100 pg.mL<sup>-1</sup> with XF, XFF and XFM primers and up to 10 pg.mL<sup>-1</sup> with  
297 XFMO primers.

298 A triplex qPCR assay for the simultaneous detection of subspecies *fastidiosa* and *multiplex* has recently  
299 been published (Burbank and Ortega, 2018). In order to analyze the potential of their targets and  
300 potentially introduce them into our sets to improve *Xf* detection, we tested their specificity *in silico* and  
301 *in vitro* on selected bacterial strains. According to BLASTn searches, *Xff* primers potentially amplified  
302 two of the three strains of the subsp. *sandyi* (CFBP 8073: ST75 and Co33: ST72) without mismatches  
303 and seven strains of the subsp. *pauca* (CoDiRo, COF0407, De Donno, OLS0478, OLS0479, Salento-  
304 1 and Salento-2) with one and two mismatches on the forward and reverse primers, respectively  
305 (Supplemental data 3). *In silico*, *Xfm* primers potentially amplified eight strains of subsp. *pauca*  
306 (CFBP 8072, CoDiRo, COF0407, De Donno, OLS0478, OLS0479, Salento-1, Salento-2) with three  
307 mismatches on the forward primer, two mismatches on the reverse primer and one mismatch on the  
308 probe, and amplicons had the expected size. We double checked the specificity of these two sets *in*  
309 *vitro* on bacterial suspensions (Supplemental data 4). *Xff* primers amplified the three tested strains of  
310 subsp. *sandyi* (CFBP 8356, CFBP 8419 and CFBP 8077) and six of the seven tested strains of subsp.  
311 *pauca* (CFBP 8074, CFBP 8402, CFBP 8429, CFBP 8477, CFBP 8495 and CFBP 8498). The  
312 sequencing of all amplicons confirmed the results of the qPCR assays. *Xfm* primers amplified five of  
313 the seven tested strains of *Xf* subsp. *pauca* (CFBP 8072, CFBP 8074, CFBP 8402, CFBP 8495 and  
314 CFBP 8498). Burbank and Ortega (2018) used a cut off at Ct=35 for categorizing a result as positive.  
315 In that case only two *pauca* strains (CFBP 8072 and CFBP 8495) would have been identified as *Xfm*,  
316 the others having values ranging between 35.33 and 35.83. For *Xfm*, due to the high Ct values, no  
317 sequencing was feasible to confirm the identification.

### 318 3.3 Identification of *Xf* subspecies in spiked samples with tetraplex qPCR assays

319 After validation of the efficiency and specificity of the primers and probe, the three sets of tetraplex  
320 qPCR assays n°1, 2 and 3, were tested on spiked samples. As the three sets gave similar results, this  
321 section is focused on the tetraplex set n°1: XF – XFFSL – XFM – XFP, which covers the full known  
322 diversity of *Xf* (Table 5). The results of the other two tetraplex assays are provided in Supplemental  
323 Data 5 and Supplemental data 6. This tetraplex qPCR assay (set n°1) was tested on 29 combinations of  
324 plant petioles and midribs spiked with one to three strains of the different subspecies. (The full results  
325 of the dilution ranges are available in Supplemental data 7). This tetraplex allowed the detection and  
326 correct identification of all subspecies in all combinations without false positive result. Although the  
327 detection limit was expected to be similar for all plants, since they were all enriched with the same  
328 bacterial suspensions, different LODs were observed ranging from 1x10<sup>3</sup> to 1x10<sup>5</sup> CFU.mL<sup>-1</sup> (5 to  
329 5x10<sup>3</sup> CFU/reaction) depending on the matrix for plants spiked with only one strain. An independent  
330 repetition of this test was performed two months after the first one. For *O. europaea*, *P. myrtifolia*, *P.*  
331 *cerasus*, *P. dulcis* and *Q. ilex* the LOD was either identical between the two assays or 10 time higher.  
332 The LOD of *Xf* in *V. vinifera* was 100 times higher in the second assay highlighting a potential  
333 accumulation of qPCR inhibitors between the two experiments. Moreover, on 11 combinations out of  
334 46, XF primers had a LOD 10 times higher *in planta* than the one obtained for the subspecies. *Xf*  
335 subspecies could be identified until a Ct value of 35.08 using Harper's qPCR assay in a spiked sample



## *in planta* identification of *Xylella fastidiosa* subspecies

336 of *P. dulcis*. In other matrices the LOD of the tetraplex qPCR assay corresponded usually to a Ct value  
337 ranging from 30 to 34 using Harper's qPCR.

338 Moreover, the tetraplex qPCR assay set n°1 allowed the detection and identification of mix infections  
339 with two to three subspecies simultaneously. On *N. oleander*, *O. europaea*, *P. myrtifolia* and *P. dulcis*  
340 the LOD for the two or three inoculated subspecies is similar of the one obtained for single inoculations  
341 (Table 5).

342 To demonstrate that our multiplex qPCR assays are modular tools, which can be adapted to one's needs,  
343 three other primer and probe sets were evaluated. In one set, we removed the primers and probe  
344 targeting the species (set n°4: XFFSL-XFM-XFP). In a second one, we replaced it by the Harper's  
345 primers and probe as this test is known to be highly sensitive (set n°5: Harper-XFFSL-XFM-XFP), and  
346 we also tested the use of primers and probes targeting the 18S rRNA as an internal control (set n°6:  
347 18S-XFFSL-XFM-XFP). Evaluation of these three sets on calibrated DNA suspensions of the *Xff* strain  
348 CFBP 7970 indicated that the LOD for the XFFSL primers was the same than the one found previously  
349 for the sets n°1, 4, 5 and 6 (10 pg.mL<sup>-1</sup>) (Supplemental data 8). In *Q. robur* and *C. monspeliensis*  
350 samples spiked with the *Xfm* strain CFBP 8416, the LOD obtained for the primers detecting the  
351 multiplex subspecies (XFM) was the same for the three sets (1x10<sup>5</sup> CFU.mL<sup>-1</sup>) (Supplemental data 9).  
352 The use of Harper's primers and probe in set n°5 allowed the detection of *Xf* strain at the same LOD  
353 than for XF primers and probe in spiked *Q. robur* samples, but the detection was slightly better (a gain  
354 of one Log unit) in the spiked *C. monspeliensis* samples. A Ct value was obtained for all spiked samples  
355 with the 18s rRNA primers, highlighting that these primers and probe were reliable internal  
356 amplification controls.

### 357 **3.4 Identification of *Xf* subspecies in environmental plant samples and inoculated** 358 **plants by tetraplex qPCR assays**

359 Ten plant samples from Corsica, France (Table 6) and ten samples from inoculated plants (Table 7)  
360 were tested using the tetraplex set n°1. Our tetraplex qPCR assay was able to detect the bacterium in  
361 samples declared contaminated with Harper's qPCR assay up to Ct =34.97. However, this LOD was  
362 variable depending on the matrices (Table 7). While the bacterium was detected at the subspecies level  
363 with one or the other primer and probe combinations in eight environmental plant samples, the XF  
364 primers and probe was less efficient and allowed the detection in only five samples (Table 6) indicating  
365 that primer and probe combinations designed for subspecies were more sensitive than the one designed  
366 to detect the species. The subspecies was hence identified in samples that were not successfully typed  
367 using the MLST protocol. Samples of *Centranthus trinervis*, *Olea europaea* and *Phyllirea angustifolia*  
368 (n° 1, 6 and 7) were infected by a *Xffsl* strain and samples of *Helichrysum italicum*, *Lavandula stoechas*,  
369 *Polygala myrtifolia*, and *Spartium junceum* (n°2, 3, 8, 9 and 10) were detected infected by a *multiplex*  
370 strain. The partial MLST subspecies identification of the sample n°8 was hence validated. The assay  
371 also identified the subspecies in the ten samples obtained from inoculated plants and confirmed the  
372 identity of the inoculated strain.

## 373 **4 Discussion**

374 Since its first detection in Europe in 2013, *Xf* has been reported in various EU member states and on a  
375 wide host range ([https://ec.europa.eu/food/sites/food/files/plant/docs/ph\\_biosec\\_legis\\_emergency\\_db-  
376 host-plants\\_update12.pdf](https://ec.europa.eu/food/sites/food/files/plant/docs/ph_biosec_legis_emergency_db-host-plants_update12.pdf)). It is hence considered as an emergent plant bacterium in Europe and it is  
377 regulated in the EU as a quarantine organism under Council Directive 2000/29/EC. Control measures  
378 to prevent the spread of this pathogen within the EU are limited to eradication and containment

## *in planta* identification of *Xylella fastidiosa* subspecies

379 measures (EFSA, 2018b). Application of these outbreak management strategies require the  
380 identification of *Xf* strains at the subspecies level. Indeed, the list of host plants is provided per *Xf*  
381 subspecies with only a limited number of plants (currently 15) being hosts of all subspecies currently  
382 detected in the EU. Identifying *Xf* at the subspecies level is thus highly important to limit the number  
383 of host plants to be eradicated once an outbreak is detected.

384 In this context, on the basis of a large dataset of in-house and publicly available genome sequences of  
385 *Xf* and *SkIf*, a powerful bioinformatics-tool (Briand *et al.*, 2016; Denancé *et al.*, 2019), we identified  
386 species and subspecies signatures. These long-mers were used as targets to designed primer and probe  
387 combinations with different levels of specificity. These combinations target single-copy genes  
388 encoding proteins involved in bacterial metabolism. This is the case for the XF primers and probe  
389 targeting a gene encoding a ketol-acid reductoisomerase, an enzyme essential in the biosynthesis  
390 pathway of the L-isoleucine and L-valine; XFF primers and probe target a gene encoding a restriction  
391 modification system DNA specificity, involved in defense against foreign DNA (Wilson and Murray,  
392 1991); XFM primers and probe target a gene coding a DNA methyltransferase; XFMO primers and  
393 probe target a gene coding an S24 peptidase involved in a stress-response against DNA lesions and  
394 leading to the repair of single-stranded DNA (Erill *et al.*, 2007); XFP primers and probe target a gene  
395 coding a histidine kinase and an ABC transporter substrate, two membrane proteins involved in signal  
396 transduction across the cellular membrane (Yoshida *et al.*, 2007; Tanaka *et al.*, 2018). The targets of  
397 our subspecific assays were selected to be exactly identical among all strains of a given subspecies and  
398 absent from any other bacteria, thus these targets are not recombining elements.

399 Tested on a large collection of target and non-target strains, the primers and probes showed high  
400 specificity for *Xf* and its subspecies and no cross-reactions. *In vitro*, the specificity was tested in two  
401 steps. Inclusivity was evaluated on strains of *Xf* subspecies and exclusivity on a range of strains chosen  
402 to be present in the same plant and insect niches as *Xf* (Rogers, 2016) or to be genetically closely related  
403 to it. With the exception of a few studies (Boureau *et al.*, 2013; Hulley *et al.*, 2019) only one to ten  
404 non-target strains are selected to test the specificity of novel molecular detection tools (Francis *et al.*,  
405 2006; Harper *et al.*, 2010; Burbank and Ortega, 2018). Here a larger collection including 30 non-target  
406 strains and 39 *Xf* strains was analyzed to ensure the specificity of the primer and probe combinations  
407 based on the advice of the PM 7/98 of the EPPO (2014) and the MIQE of Bustin *et al.* (2009).

408 At the moment there is only few methods allowing the simultaneous detection and identification of  
409 different subspecies of *Xf* and none of them is specific. The conventional PCR test of Hernandez-  
410 Martinez *et al.* (2006) was designed to differentiate the subspecies *multiplex*, *fastidiosa* and *sandyi*.  
411 Nevertheless, the analysis of more than 300 samples collected in France and infected with subsp.  
412 *multiplex* revealed the amplification of additional bands leading to unclear patterns (Denancé *et al.*,  
413 2017). A triplex qPCR assay was recently developed to identify *Xff* and *Xfm* and was tested on  
414 grapevine, almond and insects (Burbank and Ortega, 2018). Compared to this assay, our tetraplex  
415 qPCR assays gave similar results for the analysis of spiked almond and grapevine samples. However,  
416 we did not detect any cross reaction with our primers and probes, while the test proposed by Burbank  
417 and Ortega in 2018 could lead to cross-reactions with strains from the subspecies *pauca* and *sandyi*.  
418 While *pauca* strains have not been so far detected in grapevine samples in any outbreaks, it was  
419 demonstrated that grapevine is susceptible to *pauca* strains (Li *et al.*, 2013) and caution should be taken  
420 not to misidentify *Xf* strains infecting grapevine.

421 Primers and probes optimized for qPCR tetraplex assays allowed simultaneously the detection of *Xf*  
422 and its identification at the subspecies level, providing two complementary results as the targets of the

## *in planta* identification of *Xylella fastidiosa* subspecies

423 tests are different. The use of one of these tetraplex assays hence corresponds to the first requirement  
424 for *Xf* detection as reported in PM 7/98 (EPPO, 2014). So far, subspecies identification is done by  
425 sequencing two to seven housekeeping genes (Yuan et al., 2010; EPPO, 2018b). If one of the gene  
426 amplifications fails, or if sequencing is not feasible (in case of a too low amount of DNA) then the  
427 subspecies cannot be assigned. The average value of the LOD for every gene in the *Xf* MLST scheme  
428 is at the best at  $10^5$  CFU.mL<sup>-1</sup> (Cesbron *et al.*, in prep). As demonstrated with single strain suspensions  
429 and mix-suspensions these assays display high efficiency (i.e. low LOD), even if, as Ito and Suzaki  
430 (2017) have shown, multiplexing increases the LOD by up to one log unit. With a LOD of 10 to 100  
431 pg.mL<sup>-1</sup> (i.e.  $4 \times 10^3$  to  $4 \times 10^4$  copies.mL<sup>-1</sup>), these multiplex qPCR assays still present a sensitivity that  
432 is similar to the one of the reference protocol, on single bacterial suspensions (Harper *et al.*, 2010).

433 In spiked and environmental plant samples, the benefit from the use of our tetraplex assays is obvious.  
434 The tetraplex qPCR assays developed here are able to identify *Xf* subspecies up to  $10^3$  CFU.mL<sup>-1</sup> in  
435 spiked samples. They allowed the identification of the *Xf* subspecies in environmental plant samples,  
436 as well, leading to subspecies identification when MLST failed and confirmed partial MLST  
437 identification. Subspecies was identified in samples detected infected but with high Ct values  
438 (determined at 35 with the Harper's qPCR assay), which corresponds to a bacterial load of only  $10^3$   
439 CFU.mL<sup>-1</sup>. It should be mentioned here, that to increase the chance of detecting *Xf* in low contaminated  
440 samples, a sonication step has been added before DNA extraction. Indeed, it has been known for a  
441 while that sonication allows bacterial recovery from plant samples (Morris *et al.*, 1998) and this was  
442 recently demonstrated to improve *Xf* isolation from plant samples (Bergsma-Vlami *et al.*, 2017). We  
443 hypothesize that a sonication step while disrupting biofilm, will allow a better cell lysis through a better  
444 access of chemicals to the cells. Although analysis of more samples is necessary to confirm this LOD,  
445 the tetraplex qPCR assays allow the identification of *Xf* subspecies in samples for which it was not  
446 possible with the current MLST scheme, even considering only two genes.

447 In spiked plant samples the LOD of our tetraplex qPCR assays were 10 to 100 times higher than in  
448 bacterial suspensions. This could be linked to the presence of plant metabolites, mostly polyphenols,  
449 polysaccharides but also pectin or xylan, that act as inhibitors of the polymerase. To avoid such a  
450 problem, we already included BSA in the PCR reaction mix to chelate polyphenols (Harper *et al.*, 2010;  
451 Wei *et al.*, 2008). Moreover, we used polymerases that are known to be less susceptible to inhibitors  
452 than regular ones. The TaqMan™ Universal PCR Master Mix (used in the qPCR Harper's test) contains  
453 an AmpliTaq Gold DNA polymerase, and the SsoAdvanced™ Universal Probes Supermix (Bio-Rad)  
454 (used in our tetraplex qPCR assays) contains a Sso7d fusion polymerase. Both Taq polymerases were  
455 highlighted to have good amplification performance in comparison to nine other Taq polymerases  
456 (Witte *et al.*, 2018). The Sso7d fusion polymerase was optimized for multiplex qPCR and to amplify  
457 samples rich in inhibitors such as polysaccharides, cellulose or pectin. Grapevine and olive tree are  
458 known to be rich in polyphenols (Ortega-Garcia *et al.*, 2008; Schneider *et al.*, 2008). These compounds  
459 are accumulated in the plant during stress or fruit ripening (Ortega-Garcia *et al.*, 2008; Ennajeh *et al.*,  
460 2009). These variations could explain the 10 to 100 fold higher LOD obtain for the second repetition  
461 that was performed with grapevine and olive tree sampled two months after the first sample set.

462 While we added a sonication step to improve DNA extraction, we did not test here other ways to  
463 improve *per se* the DNA extraction step and improve the LOD of our assays. Various options are  
464 available. A phenol-chloroform step could be added to the DNA extraction method to reduce the level  
465 of extracted proteins (Schrader *et al.*, 2012). Reagents such as Tween 20, DMSO, polyethylene glycol  
466 or active carbon could be used to precipitate the polysaccharides before DNA precipitation (Schrader  
467 *et al.*, 2012). Phenol levels may be reduced with the use of polyvinyl-pyrrolidone or the addition of

### *in planta* identification of *Xylella fastidiosa* subspecies

468 borate (Wilkins and Smart, 1996). Drying plant samples at 65°C for 2 days, prior to DNA extraction,  
469 could also help to cancel out the effect of phenolic inhibitors (Sipahioglu *et al.*, 2006).

470 One of the great advantages of the multiplex qPCR assays we developed is that they are modular and  
471 reliable. Combinations of primers and probe can be adapted to include sets aiming at detecting  
472 infections at the species and/or only at the subspecies level, and having internal controls for each  
473 reaction. We showed here as proofs of concept, that replacing our XF primers and probe with the ones  
474 from Harper's test is feasible and leads to highly susceptible test, as using 18S rRNA primers and probe  
475 as internal control is efficient.

476 In addition, unlike with identification relying on MLST scheme, the qPCR tetraplex assays allow the  
477 simultaneous identification of several subspecies in one sample, as demonstrated with spiked samples.  
478 In fact, mix infections with two subspecies of *Xf* have already been observed in naturally infected plants  
479 (Chen *et al.*, 2005; Bergsma-Vlami *et al.*, 2017; Denancé *et al.*, 2017). This leads to the observation of  
480 multiple peaks on the sequencing sequence of a housekeeping gene and is complex to analyze and  
481 differentiate from a sequencing error (Denancé *et al.*, 2017). The simultaneous detection and  
482 identification of multiple subspecies brings the tetraplex qPCR assays powerful tools to easily and  
483 quickly detect mixed infection or to study *Xf* in areas such as Europe where several subspecies live in  
484 sympatry (Denancé *et al.*, 2017).

485 When a new assay is developed, the time and cost difference with current protocols must be taken into  
486 account. The tetraplex qPCR assays are much faster and cheaper than using a test for detection and  
487 then a reduced MLST scheme for subspecies assignation. The current protocol costs are for Harper's  
488 qPCR detection at the writing time ~0.52€ for reagents, (for a volume of 10 µL) ~1.62€ for the  
489 amplification of two housekeeping genes (~0.81€/gene for a volume of 20 µL) and ~10.2€ for their  
490 sequencing (~5.1€/gene in both directions), hence totalizing ~12.35€ per sample. In comparison a  
491 single tetraplex qPCR assay costs ~0.37€ per sample (for a volume of 10 µL). None of these costs  
492 includes the cost of plastic materials or specialized equipment such as a qPCR thermocycler.

493 To conclude, we developed specific, effective, fast, cost-efficient and easy to set up tools allowing in  
494 one step to detect and identify at the subspecies level *Xf* infection directly in plant samples. Compared  
495 to current protocols, the LOD of our tetraplex assays allowed subspecies identification at levels where  
496 regular amplifications such as the one used for MLST failed. Tetraplex qPCR assays are also easily to  
497 perform in a routine lab and as such should be easily transferable to laboratories and are modular  
498 according to the user's needs.

## *in planta* identification of *Xylella fastidiosa* subspecies

### 499 **5 Nomenclature**

500 BLAST: Basic Local Alignment Search Tool

501 CNBC: National Botanical Conservatory of Corsica

502 INRA: French National Institute for Agricultural Research

503 IRHS: Research Institute of Horticulture and Seeds

504 LAMP: Loop-Mediated Isothermal Amplification

505 MIQE: Minimum Information for the Publication of Quantitative Real-Time PCR Experiments

506 MLST: Multi-Locus Sequence Typing

507 NCBI: National Center for Biotechnology Information

508 ST: Sequence Type

509 *Xf*: *Xylella fastidiosa*

510 *Xff*: *Xylella fastidiosa* subsp. *fastidiosa*

511 *Xffsl*: *Xylella fastidiosa* subsp. *fastidiosa* sensu lato

512 *Xfm*: *Xylella fastidiosa* subsp. *multiplex*

513 *Xfmo*: *Xylella fastidiosa* subsp. *morus*

514 *Xfp*: *Xylella fastidiosa* subsp. *pauca*

515 *Xfs*: *Xylella fastidiosa* subsp. *sandyi*

516 WGS: Whole Genome Shotgun

### 517 **6 Acknowledgments**

518 We thank Muriel Bahut (ANAN technical facility, SFR QUASAV, Angers, FR) for DNA extraction  
519 automatization, CIRM-CFBP (Beaucouzé, INRA, France; [http://www6.inra.fr/cirm\\_eng/CFBP-Plant-](http://www6.inra.fr/cirm_eng/CFBP-Plant-Associated-Bacteria)  
520 [Associated-Bacteria](http://www6.inra.fr/cirm_eng/CFBP-Plant-Associated-Bacteria)) for strain preservation and supply, Leonardo de la Fuente (Auburn University,  
521 AL, USA) and LSV-ANSES for sharing strains, and colleagues from CNBC for sampling plants in  
522 Corsica, France. We acknowledge Nicolas Denancé for preliminary experiments to design specific  
523 PCR tests. We thank Charles Manceau (Anses, Angers, FR) for his contribution while applying for  
524 funding, Armelle Darrasse and Matthieu Barret for fruitful discussions and critical reading of the  
525 manuscript.

### 526 **7 Author Contributions**

527 ED performed the experiments, ED and SC conducted the study, MB designed the bioinformatics tool,  
528 ED, MB, MAJ and SC designed the *in silico* analysis, and interpreted the data, MAJ conceived the  
529 study, and applied for funding, ED, MAJ and SC wrote the manuscript. All authors read and approved  
530 the final version of the manuscript.

## *in planta* identification of *Xylella fastidiosa* subspecies

### 531 **8 Conflict of Interest**

532 The authors declare that the research was conducted in the absence of any commercial or financial  
533 relationships that could be construed as a potential conflict of interest. The present work reflects only  
534 the authors' view and no analysis has been made in the French Reference Lab; in particular ED is not  
535 authorized to perform any official tests at Anses.

### 536 **9 Funding**

537 ED salary was funded by INRA SPE division and Anses. This work received support from the  
538 European Union's Horizon 2020 research and innovation program under grant agreement 727987  
539 XF\_ACTORS (Xylella Fastidiosa Active Containment Through a multidisciplinary-Oriented  
540 Research Strategy). The present work reflects only the authors' view and the EU funding agency is  
541 not responsible for any use that may be made of the information it contains.

### 542 **10 References**

- 543 Abraham, N. D., Chitrampal, P., Keriö, S., and LeBoldus, J. M. (2018). Multiplex qPCR for detection  
544 and quantification of *Sphaerulina musiva* in *Populus* stems. *Plant Pathology* 67, 1874–1882.  
545 doi:10.1111/ppa.12913.
- 546 Bergsma-Vlami, M., van de Bilt, J. L. J., Tjou-Tam-Sin, N. N. A., Helderma, C. M., Gorkink-Smits,  
547 P. P. M. A., Landman, N. M., et al. (2017). Assessment of the genetic diversity of *Xylella*  
548 *fastidiosa* in imported ornamental *Coffea arabica* plants. *Plant Pathol* 66, 1065–1074.  
549 doi:10.1111/ppa.12696.
- 550 Bonants, P., Griekspoor, Y., Houwers, I., Krijger, M., Zouwen van der, P., van der Lee, T., et al. (2018).  
551 The development and evaluation of a triplex TaqMan assay and Next Generation Sequence  
552 Analysis for improved detection of *Xylella* in plant material. *Plant Disease*. doi:10.1094/PDIS-  
553 08-18-1433-RE.
- 554 Boureau, T., Kerkoud, M., Chhel, F., Hunault, G., Darrasse, A., Brin, C., et al. (2013). A multiplex-  
555 PCR assay for identification of the quarantine plant pathogen *Xanthomonas axonopodis* pv.  
556 *phaseoli*. *Journal of Microbiological Methods* 92, 42–50. doi:10.1016/j.mimet.2012.10.012.
- 557 Briand, M., Gaborieau, R., Jacques, M.-A., Barret, M., Boureau, T., Gaillard, S., et al. (2016). SkIf: a  
558 tool for rapid identification of genes or regulators of interest. *F1000Research* 5.  
559 doi:10.7490/f1000research.1112490.1.
- 560 Burbank, L. P., and Ortega, B. C. (2018). Novel amplification targets for rapid detection and  
561 differentiation of *Xylella fastidiosa* subspecies *fastidiosa* and multiplex in plant and insect  
562 tissues. *Journal of Microbiological Methods* 155, 8–18. doi:10.1016/j.mimet.2018.11.002.
- 563 Bustin, S. A., Benes, V., Garson, J. A., Hellemans, J., Huggett, J., Kubista, M., et al. (2009). The MIQE  
564 Guidelines: Minimum Information for Publication of Quantitative Real-Time PCR  
565 Experiments. *Clinical Chemistry* 55, 611–622. doi:10.1373/clinchem.2008.112797.
- 566 C/2017/4883 (2017). Commission Implementing Directive (EU) 2017/1279 of 14 July 2017 amending  
567 Annexes I to V to Council Directive 2000/29/EC on protective measures against the  
568 introduction into the Community of organisms harmful to plants or plant products and against

*in planta* identification of *Xylella fastidiosa* subspecies

- 569 their spread within the Community. Available at:  
570 [http://data.europa.eu/eli/dir\\_impl/2017/1279/oj/fra](http://data.europa.eu/eli/dir_impl/2017/1279/oj/fra) [Accessed November 20, 2018].
- 571 Chen, J., Groves, R., Civerolo, E. L., Viveros, M., Freeman, M., and Zheng, Y. (2005). Two *Xylella*  
572 *fastidiosa* Genotypes Associated with Almond Leaf Scorch Disease on the Same Location in  
573 California. *Phytopathology* 95, 708–714. doi:10.1094/PHYTO-95-0708.
- 574 Choi, W., Seol, M.-A., Jo, B.-H., Kim, I. R., and Lee, J. R. (2018). Development and application of a  
575 novel multiplex PCR method for four living modified soybeans. *Appl Biol Chem* 61, 635–641.  
576 doi:10.1007/s13765-018-0399-8.
- 577 Cruaud, A., Gonzalez, A.-A., Godefroid, M., Nidelet, S., Streito, J.-C., Thuillier, J.-M., et al. (2018).  
578 Using insects to detect, monitor and predict the distribution of *Xylella fastidiosa* : a case study  
579 in Corsica. *Scientific Reports* 8, 15628. doi:10.1038/s41598-018-33957-z.
- 580 Denancé, N., Briand, M., Gaborieau, R., Gaillard, S., and Jacques, M.-A. (2019). Identification of  
581 genetic relationships and subspecies signatures in *Xylella fastidiosa*. *BMC Genomics* 20, 239.  
582 doi:10.1186/s12864-019-5565-9.
- 583 Denancé, N., Legendre, B., Briand, M., Olivier, V., de Boisseson, C., Poliakoff, F., et al. (2017).  
584 Several subspecies and sequence types are associated with the emergence of *Xylella fastidiosa*  
585 in natural settings in France. *Plant Pathol* 66, 1054–1064. doi:10.1111/ppa.12695.
- 586 EFSA (2018a). Update of the *Xylella* spp. host plant database. *EFSA Journal* 16.  
587 doi:10.2903/j.efsa.2018.5408.
- 588 EFSA (2018b). Updated pest categorisation of *Xylella fastidiosa*. *European Food Safety Authority*.  
589 Available at: <https://www.efsa.europa.eu/fr/efsajournal/pub/5357> [Accessed May 13, 2019].
- 590 Engels, W. R. (1993). Contributing software to the internet: the amplify program. *Trends in*  
591 *Biochemical Sciences* 18, 448–450. doi:10.1016/0968-0004(93)90148-G.
- 592 Ennajeh, M., Vadel, A. M., and Khemira, H. (2009). Osmoregulation and osmoprotection in the leaf  
593 cells of two olive cultivars subjected to severe water deficit. *Acta Physiol Plant* 31, 711–721.  
594 doi:10.1007/s11738-009-0283-6.
- 595 EPPO (2014). PM 7/98 (2) Specific requirements for laboratories preparing accreditation for a plant  
596 pest diagnostic activity. *EPPO Bull* 44. doi:10.1111/epp.12118.
- 597 EPPO (2018a). EPPO A2 List of pests recommended for regulation as quarantine pests - version 2018-  
598 09 -. Available at: [https://www.eppo.int/ACTIVITIES/plant\\_quarantine/A2\\_list](https://www.eppo.int/ACTIVITIES/plant_quarantine/A2_list) [Accessed  
599 April 12, 2018].
- 600 EPPO (2018b). PM 7/24 (3) *Xylella fastidiosa*. *EPPO Bulletin* 48, 175–218. doi:10.1111/epp.12469.
- 601 EPPO (2019). *Xylella fastidiosa* - Reporting articles. *EPPO Global Database*. Available at:  
602 <https://gd.eppo.int/taxon/XYLEFA/reporting> [Accessed March 27, 2019].

### *in planta* identification of *Xylella fastidiosa* subspecies

- 603 Erill, I., Campoy, S., and Barbé, J. (2007). Aeons of distress: an evolutionary perspective on the  
604 bacterial SOS response. *FEMS Microbiol Rev* 31, 637–656. doi:10.1111/j.1574-  
605 6976.2007.00082.x.
- 606 Francis, M., Lin, H., Cabrera-La Rosa, J., Doddapaneni, H., and Civerolo, E. L. (2006). Genome-based  
607 PCR primers for specific and sensitive detection and quantification of *Xylella fastidiosa*.  
608 *European journal of plant pathology*. doi:<https://doi.org/10.1007/s10658-006-9009-4>.
- 609 Harper, S. J., Ward, L. I., and Clover, G. R. G. (2010). Development of LAMP and real-time PCR  
610 methods for the rapid detection of *Xylella fastidiosa* for quarantine and field applications.  
611 *Phytopathology* 100, 1282–1288. doi:10.1094/PHYTO-06-10-0168.
- 612 Hernandez-Martinez, R., Costa, H. S., Dumenyo, C. K., and Cooksey, D. A. (2006). Differentiation of  
613 Strains of *Xylella fastidiosa* Infecting Grape, Almonds, and Oleander Using a Multiprimer PCR  
614 Assay. *Plant Disease* 90, 1382–1388. doi:10.1094/PD-90-1382.
- 615 Hulley, E. N., Tharmalingam, S., Zarnke, A., and Boreham, D. R. (2019). Development and validation  
616 of probe-based multiplex real-time PCR assays for the rapid and accurate detection of  
617 freshwater fish species. *PLOS ONE* 14, e0210165. doi:10.1371/journal.pone.0210165.
- 618 Ioos, R., Fourrier, C., Wilson, V., Webb, K., Schereffer, J.-L., and de Labrouhe, D. T. (2012). An  
619 Optimized Duplex Real-Time PCR Tool for Sensitive Detection of the Quarantine Oomycete  
620 *Plasmopara halstedii* in Sunflower Seeds. *Phytopathology* 102, 908–917. doi:10.1094/PHYTO-  
621 04-12-0068-R.
- 622 Ito, T., and Suzaki, K. (2017). Universal detection of phytoplasmas and *Xylella* spp. by TaqMan  
623 singleplex and multiplex real-time PCR with dual priming oligonucleotides. *PLOS ONE* 12,  
624 e0185427. doi:10.1371/journal.pone.0185427.
- 625 Jacques, M.-A., Denancé, N., Legendre, B., Morel, E., Briand, M., Mississippi, S., et al. (2016). New  
626 Coffee Plant-Infecting *Xylella fastidiosa* Variants Derived via Homologous Recombination.  
627 *Appl. Environ. Microbiol.* 82, 1556–1568. doi:10.1128/AEM.03299-15.
- 628 Janse, I., Hamidjaja, R. A., Hendriks, A. C., and van Rotterdam, B. J. (2013). Multiplex qPCR for  
629 reliable detection and differentiation of *Burkholderia mallei* and *Burkholderia pseudomallei*.  
630 *BMC Infectious Diseases* 13, 86. doi:10.1186/1471-2334-13-86.
- 631 Kamau, E., Alemayehu, S., Feghali, K. C., Saunders, D., and Ockenhouse, C. F. (2013). Multiplex  
632 qPCR for Detection and Absolute Quantification of Malaria. *PLOS ONE* 8, e71539.  
633 doi:10.1371/journal.pone.0071539.
- 634 Köppel, R., Schum, R., Habermacher, M., Sester, C., Piller, L. E., Meissner, S., et al. (2019). Multiplex  
635 real-time PCR for the detection of insect DNA and determination of contents of *Tenebrio*  
636 *molitor*, *Locusta migratoria* and *Achaeta domestica* in food. *Eur Food Res Technol* 245, 559–  
637 567. doi:10.1007/s00217-018-03225-5.
- 638 Koressaar, T., and Remm, M. (2007). Enhancements and modifications of primer design program  
639 Primer3. *Bioinformatics* 23, 1289–1291. doi:10.1093/bioinformatics/btm091.



### *in planta* identification of *Xylella fastidiosa* subspecies

- 640 Landa, B. (2017). Emergence of *Xylella fastidiosa* in Spain: current situation. Presentation made at the  
641 European Conference on *Xylella* 2017. Available at:  
642 <https://www.efsa.europa.eu/en/events/event/171113> [Accessed January 17, 2019].
- 643 Li, W., Abad, J. A., French-Monar, R. D., Rascoe, J., Wen, A., Gudmestad, N. C., et al. (2009).  
644 Multiplex real-time PCR for detection, identification and quantification of ‘*Candidatus*  
645 *Liberibacter solanacearum*’ in potato plants with zebra chip. *Journal of Microbiological*  
646 *Methods* 78, 59–65. doi:10.1016/j.mimet.2009.04.009.
- 647 Li, W., Teixeira, D. C., Hartung, J. S., Huang, Q., Duan, Y., Zhou, L., et al. (2013). Development and  
648 systematic validation of qPCR assays for rapid and reliable differentiation of *Xylella fastidiosa*  
649 strains causing citrus variegated chlorosis. *Journal of Microbiological Methods* 92, 79–89.  
650 doi:10.1016/j.mimet.2012.10.008.
- 651 Marcelletti, S., and Scortichini, M. (2016). Genome-wide comparison and taxonomic relatedness of  
652 multiple *Xylella fastidiosa* strains reveal the occurrence of three subspecies and a new *Xylella*  
653 species. *Arch Microbiol* 198, 803–812. doi:10.1007/s00203-016-1245-1.
- 654 Minsavage, G., Thompson, C., Hopkins, D., Leite, R., and Stall, R. (1994). Development of a  
655 Polymerase Chain Reaction Protocol for Detection of *Xylella fastidiosa* in Plant Tissue.  
656 *Phytopathology* 84, 456. doi:10.1094/Phyto-84-456.
- 657 Modesti, V., Pucci, N., Lucchesi, S., Campus, L., and Loreti, S. (2017). Experience of the Latium  
658 region (Central Italy) as a pest-free area for monitoring of *Xylella fastidiosa*: distinctive features  
659 of molecular diagnostic methods. *Eur J Plant Pathol* 148, 557–566. doi:10.1007/s10658-016-  
660 1111-7.
- 661 Morris, C. E., Monier, J.-M., and Jacques, M.-A. (1998). A Technique To Quantify the Population Size  
662 and Composition of the Biofilm Component in Communities of Bacteria in the Phyllosphere.  
663 *Appl Environ Microbiol* 64, 4789–4795.
- 664 Mougel, C., Cournoyer, B., and Nesme, X. (2001). Novel Tellurite-Amended Media and Specific  
665 Chromosomal and Ti Plasmid Probes for Direct Analysis of Soil Populations of *Agrobacterium*  
666 *Biovars* 1 and 2. *Appl. Environ. Microbiol.* 67, 65–74. doi:10.1128/AEM.67.1.65-74.2001.
- 667 Nunney, L., Azad, H., and Stouthamer, R. (2019). An Experimental Test of the Host-Plant Range of  
668 Nonrecombinant Strains of North American *Xylella fastidiosa* subsp. *multiplex*.  
669 *Phytopathology* 109, 294–300. doi:10.1094/PHYTO-07-18-0252-FI.
- 670 Nunney, L., Schuenzel, E. L., Scally, M., Bromley, R. E., and Stouthamer, R. (2014). Large-Scale  
671 Intersubspecific Recombination in the Plant-Pathogenic Bacterium *Xylella fastidiosa* Is  
672 Associated with the Host Shift to Mulberry. *Appl Environ Microbiol* 80, 3025–3033.  
673 doi:10.1128/AEM.04112-13.
- 674 Ortega-Garcia, F., Blanco, S., Peinado, M. A., and Peragon, J. (2008). Polyphenol oxidase and its  
675 relationship with oleuropein concentration in fruits and leaves of olive (*Olea europaea*) cv.  
676 “Picual” trees during fruit ripening. *Tree Physiology* 28, 45–54. doi:10.1093/treephys/28.1.45.

### *in planta* identification of *Xylella fastidiosa* subspecies

- 677 Ouyang, P., Arif, M., Fletcher, J., Melcher, U., and Corona, F. M. O. (2013). Enhanced Reliability and  
678 Accuracy for Field Deployable Bioforensic Detection and Discrimination of *Xylella fastidiosa*  
679 subsp. *pauca*, Causal Agent of Citrus Variegated Chlorosis Using Razor Ex Technology and  
680 TaqMan Quantitative PCR. *PLOS ONE* 8, e81647. doi:10.1371/journal.pone.0081647.
- 681 Potnis, N., Kandel, P. P., Merfa, M. V., Retchless, A. C., Parker, J. K., Stenger, D. C., et al. (2019).  
682 Patterns of inter- and intrasubspecific homologous recombination inform eco-evolutionary  
683 dynamics of *Xylella fastidiosa*. *ISME J* 13, 2319–2333. doi:10.1038/s41396-019-0423-y.
- 684 Reizenzein, H. (2017). “PCR assays for the detection of *Xylella fastidiosa*. Review and comparison of  
685 published protocols,” in *Xylella fastidiosa & the Olive Quick Decline Syndrome (OQDS). A*  
686 *serious worldwide challenge for the safeguard of olive trees* Options Méditerranéennes : Série  
687 A. Séminaires Méditerranéens., eds. A. M. D’Onghia, F. Valentini, and S. Brunel (Bari :  
688 CIHEAM), 57–60. Available at: <http://om.ciheam.org/om/pdf/a121/00007213.pdf>.
- 689 Rogers, E. E. (2016). Deep 16S rRNA gene sequencing of anterior foregut microbiota from the blue-  
690 green sharpshooter (*Graphocephala atropunctata*). *Journal of Applied Entomology* 140, 801–  
691 805. doi:10.1111/jen.12303.
- 692 Saponari, M., Boscia, D., Nigro, F., and Martelli, G. P. (2013). Identification of DNA sequences related  
693 to *Xylella fastidiosa* in oleander, almond and olive trees exhibiting leaf scorch symptoms in  
694 Apulia (southern Italy). *Journal of Plant Pathology* 95.  
695 doi:<http://dx.doi.org/10.4454/JPP.V95I3.035>.
- 696 Schneider, E., Heydt, H. von der, and Esperester, A. (2008). Evaluation of Polyphenol Composition in  
697 Red Leaves from Different Varieties of *Vitis vinifera*. *Planta Med* 74, 565–572. doi:10.1055/s-  
698 2008-1034370.
- 699 Schrader, C., Schielke, A., Ellerbroek, L., and Johne, R. (2012). PCR inhibitors – occurrence,  
700 properties and removal. *Journal of Applied Microbiology* 113, 1014–1026. doi:10.1111/j.1365-  
701 2672.2012.05384.x.
- 702 Sipahioglu, H. M., Usta, M., and Ocak, M. (2006). Use of dried high-phenolic laden host leaves for  
703 virus and viroid preservation and detection by PCR methods. *Journal of Virological Methods*  
704 137, 120–124. doi:10.1016/j.jviromet.2006.06.009.
- 705 Tanaka, K. J., Song, S., Mason, K., and Pinkett, H. W. (2018). Selective substrate uptake: The role of  
706 ATP-binding cassette (ABC) importers in pathogenesis. *Biochim Biophys Acta* 1860, 868–877.  
707 doi:10.1016/j.bbamem.2017.08.011.
- 708 Wang, F., Feng, J., Ye, S., Huang, H., and Zhang, X. (2018). Development of a multiplex fluorescence  
709 quantitative PCR for detection of genetically modified organisms. *Biologia* 73, 21–29.  
710 doi:10.2478/s11756-018-0004-y.
- 711 Wei, S., Daliri, E. B.-M., Chelliah, R., Park, B.-J., Lim, J.-S., Baek, M.-A., et al. (2019). Development  
712 of a multiplex real-time PCR for simultaneous detection of *Bacillus cereus*, *Listeria*  
713 *monocytogenes*, and *Staphylococcus aureus* in food samples. *Journal of Food Safety* 39,  
714 e12558. doi:10.1111/jfs.12558.

## *in planta* identification of *Xylella fastidiosa* subspecies

- 715 Wei, T., Lu, G., and Clover, G. (2008). Novel approaches to mitigate primer interaction and eliminate  
716 inhibitors in multiplex PCR, demonstrated using an assay for detection of three strawberry  
717 viruses. *Journal of Virological Methods* 151, 132–139. doi:10.1016/j.jviromet.2008.03.003.
- 718 Wells, J. M., Raju, B. C., Nyland, G., and Lowe, S. K. (1981). Medium for Isolation and Growth of  
719 Bacteria Associated with Plum Leaf Scald and Phony Peach Diseases. *Appl Environ Microbiol*  
720 42, 357–363.
- 721 Wilkins, T. A., and Smart, L. B. (1996). “Isolation of RNA from plant tissue,” in *A laboratory guide*  
722 *to RNA: isolation, analysis, and synthesis* New York: Wiley-Liss. (Krieg, P. A.), 21–42.
- 723 Willsey, T. L., Chatterton, S., Heynen, M., and Erickson, A. (2018). Detection of interactions between  
724 the pea root rot pathogens *Aphanomyces euteiches* and *Fusarium* spp. using a multiplex qPCR  
725 assay. *Plant Pathology* 67, 1912–1923. doi:10.1111/ppa.12895.
- 726 Wilson, G. G., and Murray, N. E. (1991). Restriction and Modification Systems. *Annual Review of*  
727 *Genetics* 25, 585–627. doi:10.1146/annurev.ge.25.120191.003101.
- 728 Witte, A. K., Sickha, R., Mester, P., Fister, S., Schoder, D., and Rossmanith, P. (2018). Essential role  
729 of polymerases for assay performance – Impact of polymerase replacement in a well-  
730 established assay. *Biomolecular Detection and Quantification* 16, 12–20.  
731 doi:10.1016/j.bdq.2018.10.002.
- 732 Yoshida, T., Phadtare, S., and Inouye, M. (2007). “The Design and Development of Tar-EnvZ  
733 Chimeric Receptors,” in *Methods in Enzymology* Two-Component Signaling Systems, Part B.,  
734 eds. M. I. Simon, B. R. Crane, and A. Crane (Academic Press), 166–183. doi:10.1016/S0076-  
735 6879(07)23007-1.
- 736 Yuan, X., Morano, L., Bromley, R., Spring-Pearson, S., Stouthamer, R., and Nunney, L. (2010).  
737 Multilocus Sequence Typing of *Xylella fastidiosa* Causing Pierce’s Disease and Oleander Leaf  
738 Scorch in the United States. *Phytopathology* 100, 601–611. doi:10.1094/PHYTO-100-6-0601.
- 739 Zitnick-Anderson, K., Simons, K., and Pasche, J. S. (2018). Detection and qPCR quantification of  
740 seven *Fusarium* species associated with the root rot complex in field pea. *Canadian Journal of*  
741 *Plant Pathology* 40, 261–271. doi:10.1080/07060661.2018.1429494.

742

### **Tables**

- 744 Table 1: List of strains used in this study and signals obtained with the primers and probe  
745 combinations in simplex qPCR assays on DNA suspensions calibrated at OD<sub>600nm</sub> = 0.1.
- 746 Table 2: Description and composition of the longest specific long-mers obtained using SkIf for  
747 the various targets.
- 748 Table 3: Primers and probes designed in this study for *Xf* detection at the species and subspecies  
749 level.

## *in planta* identification of *Xylella fastidiosa* subspecies

750 Table 4: Efficiency of the primer and probe sets in simplex qPCR assays on extracted DNA of  
751 bacterial strains in comparison with the Harper's test (Harper et al., 2010). A, Mean Ct value for each  
752 primer and probe set on target strains; B, Percentage of efficiency and standard curve parameters of  
753 each primer and probe set on target strains.

754 Table 5: Limit of detection (LOD) of *X. fastidiosa* strains in spiked matrices using the tetraplex  
755 qPCR assay XF – XFFSL – XFM – XFP (set n°1) in comparison with the reference test (Harper's test,  
756 Harper et al., 2010).

757 Table 6: Detection of *X. fastidiosa* in environmental plant samples with low population sizes  
758 using the tetraplex qPCR assay set n° 1 in comparison with the reference test (Harper's test, Harper et  
759 al., 2010).

760 Table 7: Detection of *X. fastidiosa* in inoculated plants using the tetraplex qPCR assay (set n° 1)  
761 in comparison with the reference test (Harper's test, Harper et al., 2010).

### 762 **Additional files**

763 Supplemental data 1: *Xffsl* specific kmer identified

764 Supplemental data 2: Efficiency of primers and probes sets multiplexed in tetraplex qPCR assays N°  
765 1, 2 and 3 on Xf strains.

766 Supplemental data 3: In silico assessment of the specificity of *X. fastidiosa* subsp. *fastidiosa* (Xff) and  
767 *X. fastidiosa* subsp. *multiplex* (Xfm) primers and probe sets proposed by Burbank et al., 2018.

768 Supplemental data 4: Assessment of target specificity of Burbank et al., 2018 Xff and Xfm primers  
769 and probe sets using collections of strains.

770 Supplemental data 5: LOD of *X. fastidiosa* in spiked matrices using the tetraplex qPCR assay XF –  
771 XFF – XFM – XFP (set n°2).

772 Supplemental data 6: LOD of *X. fastidiosa* in spiked matrices using the tetraplex qPCR assay XF –  
773 XFF – XFM – XFMO (set n°3).

774 Supplemental data 7: Detection *X. fastidiosa* in dilution ranges of spiked matrices using the tetraplex  
775 qPCR assay XF – XFFSL – XFM – XFP (set n°1)

776 Supplemental data 8: Comparison of LOD of *X. fastidiosa* subsp. *fastidiosa* strain CFBP 7970 using  
777 the multiplex sets n°1, n°4, n°5 and n°6.

778 Supplemental data 9: Comparison of LOD of *X. fastidiosa* in spiked matrices using the multiplex set  
779 n°1, n°4, n°5 and n°6.

780

*in planta* identification of *Xylella fastidiosa* subspecies

781  
782  
783

**Table 1: List of strains used in this study and signals obtained with the primers and probe combinations in simplex qPCR assays on DNA suspensions calibrated at OD<sub>600nm</sub> = 0.1.**

| Strain code     | Nomenclature                                             | Mean Ct value for each primer and probe set |       |       |       |     |       |
|-----------------|----------------------------------------------------------|---------------------------------------------|-------|-------|-------|-----|-------|
|                 |                                                          | XF <sup>a</sup>                             | XFF   | XFM   | XFMO  | XFP | XFFSL |
| CFBP 6448       | <i>Agrobacterium rubi</i>                                | na <sup>b</sup>                             | na    | na    | na    | na  | na    |
| CFBP 2413       | <i>Agrobacterium tumefaciens</i>                         | na                                          | na    | na    | na    | na  | na    |
| CFBP 5523       | <i>Agrobacterium vitis</i>                               | na                                          | na    | na    | na    | na  | na    |
| CFBP 2404       | <i>Clavibacter insidiosus</i>                            | na                                          | na    | na    | na    | na  | na    |
| CFBP 1200       | <i>Dickeya dianthicola</i>                               | na                                          | na    | na    | na    | na  | na    |
| CFBP 5561       | <i>Ensifer meliloti</i>                                  | na                                          | na    | na    | na    | na  | na    |
| CFBP 1232       | <i>Erwinia amylovora</i>                                 | na                                          | na    | na    | na    | na  | na    |
| CFBP 3845       | <i>Pantoea agglomerans</i>                               | na                                          | na    | na    | na    | na  | na    |
| CFBP 3167       | <i>Pantoea stewartii</i> pv. <i>stewartii</i>            | na                                          | na    | na    | na    | na  | na    |
| CFBP 3205       | <i>Pseudomonas amygdali</i>                              | na                                          | na    | na    | na    | na  | na    |
| CFBP 8305       | <i>Pseudomonas cerasi</i>                                | na                                          | na    | na    | na    | na  | na    |
| CFBP 1573       | <i>Pseudomonas syringae</i> pv. <i>persicae</i>          | na                                          | na    | na    | na    | na  | na    |
| CFBP 1392       | <i>Pseudomonas syringae</i> pv. <i>syringae</i>          | na                                          | na    | na    | na    | na  | na    |
| CFBP 7436       | <i>Rhizobium nepotum</i>                                 | na                                          | na    | na    | na    | na  | na    |
| CFBP 13100      | <i>Stenotrophomonas maltophilia</i>                      | na                                          | na    | na    | na    | na  | na    |
| CFBP 3371       | <i>Xanthomonas euvesicatoria</i> pv. <i>citrumelonis</i> | na                                          | na    | na    | na    | na  | na    |
| CFBP 2528       | <i>Xanthomonas arboricola</i> pv. <i>juglandis</i>       | na                                          | na    | na    | na    | na  | na    |
| CFBP 2535       | <i>Xanthomonas arboricola</i> pv. <i>pruni</i>           | na                                          | na    | na    | na    | na  | na    |
| CFBP 4924       | <i>Xanthomonas axonopodis</i> pv. <i>axonopodis</i>      | na                                          | na    | na    | na    | na  | na    |
| CFBP 5241       | <i>Xanthomonas campestris</i> pv. <i>campestris</i>      | na                                          | na    | na    | na    | na  | na    |
| CFBP 2901       | <i>Xanthomonas citri</i> pv. <i>aurantifolii</i>         | na                                          | na    | na    | na    | na  | na    |
| CFBP 2525       | <i>Xanthomonas citri</i> pv. <i>citri</i>                | na                                          | na    | na    | na    | na  | na    |
| CFBP 7660       | <i>Xanthomonas citri</i> pv. <i>viticola</i>             | na                                          | na    | na    | na    | na  | na    |
| CFBP 2625       | <i>Xanthomonas gardneri</i>                              | na                                          | na    | na    | na    | na  | na    |
| CFBP 2533       | <i>Xanthomonas hortorum</i> pv. <i>pelargonii</i>        | na                                          | na    | na    | na    | na  | na    |
| CFBP 1156       | <i>Xanthomonas hyacinthi</i>                             | na                                          | na    | na    | na    | na  | na    |
| CFBP 2532       | <i>Xanthomonas oryzae</i> pv. <i>oryzae</i>              | na                                          | na    | na    | na    | na  | na    |
| CFBP 2054       | <i>Xanthomonas translucens</i>                           | na                                          | na    | na    | na    | na  | na    |
| CFBP 2543       | <i>Xanthomonas vasicola</i> pv. <i>holcicola</i>         | na                                          | na    | na    | na    | na  | na    |
| CFBP 1192       | <i>Xylophilus ampelinus</i>                              | na                                          | na    | na    | na    | na  | na    |
| CFBP 13349      | <i>Xylella fastidiosa</i> subsp. <i>fastidiosa</i>       | 20.81                                       | 19.02 | na    | na    | na  | 20.06 |
| CFBP 13354      | <i>Xylella fastidiosa</i> subsp. <i>fastidiosa</i>       | 20.20                                       | 18.1  | na    | na    | na  | 18.83 |
| Temecula 1      | <i>Xylella fastidiosa</i> subsp. <i>fastidiosa</i>       | 20.83                                       | 19.13 | na    | na    | na  | 22.41 |
| CFBP 7969       | <i>Xylella fastidiosa</i> subsp. <i>fastidiosa</i>       | 19.81                                       | 17.68 | na    | na    | na  | 18.51 |
| CFBP 7970       | <i>Xylella fastidiosa</i> subsp. <i>fastidiosa</i>       | 19.33                                       | 17.04 | na    | na    | na  | 21.66 |
| CFBP 8069       | <i>Xylella fastidiosa</i> subsp. <i>fastidiosa</i>       | 21.19                                       | 19.68 | na    | na    | na  | 20.03 |
| CFBP 8071       | <i>Xylella fastidiosa</i> subsp. <i>fastidiosa</i>       | 19.89                                       | 17.94 | na    | na    | na  | 18.42 |
| CFBP 8082       | <i>Xylella fastidiosa</i> subsp. <i>fastidiosa</i>       | 20.21                                       | 18.85 | na    | na    | na  | 24.58 |
| CFBP 8083       | <i>Xylella fastidiosa</i> subsp. <i>fastidiosa</i>       | 19.37                                       | 17.91 | na    | na    | na  | 18.25 |
| CFBP 8351       | <i>Xylella fastidiosa</i> subsp. <i>fastidiosa</i>       | 19.38                                       | 17.63 | na    | na    | na  | 20.16 |
| CFBP 8084       | <i>Xylella fastidiosa</i> subsp. <i>morus</i>            | 21.86                                       | na    | na    | 21.48 | na  | 18.94 |
| CFBP 8076       | <i>Xylella fastidiosa</i> subsp. <i>multiplex</i>        | 19.88                                       | na    | 19.41 | na    | na  | na    |
| CFBP 8078       | <i>Xylella fastidiosa</i> subsp. <i>multiplex</i>        | 23.81                                       | na    | 23.58 | na    | na  | na    |
| CFBP 13552      | <i>Xylella fastidiosa</i> subsp. <i>multiplex</i>        | 19.44                                       | na    | 18.73 | na    | na  | na    |
| AlmaEm3         | <i>Xylella fastidiosa</i> subsp. <i>multiplex</i>        | 20.36                                       | na    | 19.71 | na    | na  | na    |
| ALS6            | <i>Xylella fastidiosa</i> subsp. <i>multiplex</i>        | 20.43                                       | na    | 20.05 | na    | na  | na    |
| BB08-1          | <i>Xylella fastidiosa</i> subsp. <i>multiplex</i>        | 20.46                                       | na    | 19.94 | na    | na  | na    |
| CFBP 8173       | <i>Xylella fastidiosa</i> subsp. <i>multiplex</i>        | 20.59                                       | na    | 19.8  | na    | na  | na    |
| Georgia Plum    | <i>Xylella fastidiosa</i> subsp. <i>multiplex</i>        | 20.49                                       | na    | 20.07 | na    | na  | na    |
| GIL GRA 274 Ext | <i>Xylella fastidiosa</i> subsp. <i>multiplex</i>        | 19.45                                       | na    | 19.37 | na    | na  | na    |
| L 95-2          | <i>Xylella fastidiosa</i> subsp. <i>multiplex</i>        | 21.17                                       | na    | 20.95 | na    | na  | na    |
| LLA FAL 718 A   | <i>Xylella fastidiosa</i> subsp. <i>multiplex</i>        | 20.16                                       | na    | 20.12 | na    | na  | na    |

***in planta* identification of *Xylella fastidiosa* subspecies**

|                 |                                                   |       |    |       |    |       |       |
|-----------------|---------------------------------------------------|-------|----|-------|----|-------|-------|
| T.Oak 95-1      | <i>Xylella fastidiosa</i> subsp. <i>multiplex</i> | 19.37 | na | 19.36 | na | na    | na    |
| UVA 519-1B      | <i>Xylella fastidiosa</i> subsp. <i>multiplex</i> | 19.90 | na | 19.94 | na | na    | na    |
| VAL VAL 072 Ext | <i>Xylella fastidiosa</i> subsp. <i>multiplex</i> | 21.95 | na | 19.78 | na | na    | na    |
| CFBP 8416       | <i>Xylella fastidiosa</i> subsp. <i>multiplex</i> | 21.08 | na | 20.2  | na | na    | na    |
| CFBP 8432       | <i>Xylella fastidiosa</i> subsp. <i>multiplex</i> | 20.33 | na | 20.34 | na | na    | na    |
| CFBP 8072       | <i>Xylella fastidiosa</i> subsp. <i>pauca</i>     | 18.72 | na | na    | na | 18.19 | na    |
| CFBP 8074       | <i>Xylella fastidiosa</i> subsp. <i>pauca</i>     | 22.80 | na | na    | na | 20.66 | na    |
| CFBP 8402       | <i>Xylella fastidiosa</i> subsp. <i>pauca</i>     | 21.04 | na | na    | na | 19.51 | na    |
| CFBP 8429       | <i>Xylella fastidiosa</i> subsp. <i>pauca</i>     | 26.06 | na | na    | na | 25.22 | na    |
| CFBP 8477       | <i>Xylella fastidiosa</i> subsp. <i>pauca</i>     | 23.59 | na | na    | na | 22.91 | na    |
| CFBP 8495       | <i>Xylella fastidiosa</i> subsp. <i>pauca</i>     | 20.00 | na | na    | na | 19.19 | na    |
| CFBP 8498       | <i>Xylella fastidiosa</i> subsp. <i>pauca</i>     | 21.46 | na | na    | na | 19.71 | na    |
| CFBP 8077       | <i>Xylella fastidiosa</i> subsp. <i>sandyi</i>    | 19.31 | na | na    | na | na    | 20.52 |
| CFBP 8356       | <i>Xylella fastidiosa</i> subsp. <i>sandyi</i>    | 20.55 | na | na    | na | na    | 21.41 |
| CFBP 8419       | <i>Xylella fastidiosa</i> subsp. <i>sandyi</i>    | 23.38 | na | na    | na | na    | 24.23 |
| CFBP 8478       | <i>Xylella fastidiosa</i> subsp. <i>sandyi</i>    | 22.75 | na | na    | na | na    | 23.58 |
| MED PRI 047     | <i>Xylella fastidiosa</i> subsp. <i>sandyi</i>    | 20.96 | na | na    | na | na    | 22.13 |

784 <sup>a</sup>: see Table 3 for description of codes of primer and probe sets

785 <sup>b</sup>: not amplified

786

787

**Table 2: Description and composition of the longest specific long-mers obtained using SkIf for the various targets.**

| Target <sup>a</sup> | Long-mer size (bp) | Long-mer position (in the genome of the given strain) | Targeted CDS: locus name, position                                                                                                                                      | Putative function                                                    |
|---------------------|--------------------|-------------------------------------------------------|-------------------------------------------------------------------------------------------------------------------------------------------------------------------------|----------------------------------------------------------------------|
| <b>XF</b>           | 986                | 1,254,689 - 1,255,674 (M23)                           | WP_004084873,<br>1,254,698 - 1,255,674                                                                                                                                  | Ketol-acid reductoisomerase                                          |
| <b>XFF</b>          | 516                | 2,477,123 - 2,477,638 (M23)                           | ACB93575,<br>2,476,428 - 2,477,645                                                                                                                                      | Restriction modification system                                      |
| <b>XFFSL</b>        | 227                | 719,367-719,593 (M23)                                 | ACB92051,<br>719,717 - 718,980                                                                                                                                          | Unknown                                                              |
| <b>XFM</b>          | 1660               | 1,825,046-1,826,705 <sup>b</sup> (M12)                | WP_004083558,<br>1,824,865 -1,825,101<br>WP_004083559,<br>1,825,613 - 1,825,855 /<br>WP_004083560,<br>1,826,106 - 1,826,489 /<br>WP_004083562,<br>1,826,593 - 1,826,768 | Unknown<br>Unknown<br>DNA adenine methylase<br>DNA adenine methylase |
| <b>XFMO</b>         | 288                | 1,908,250-1,908,548 (MUL0034)                         | AIC14009,<br>1,908,261 - 1,908,798                                                                                                                                      | Peptidase S24                                                        |
| <b>XFP</b>          | 876                | 337,676 - 338,551 <sup>b</sup> (De Donno)             | ARO67912,<br>336,864 - 338,246 /<br>ARO69620,<br>338,246 - 339,286                                                                                                      | Histidine kinase<br>ABC transporter substrate-binding                |

788

<sup>a</sup>: see Table 3 for description of codes of primer and probe sets

789

<sup>b</sup>: the long-mer is overlapping several CDS

790

791

**Table 3: Primers and probes designed in this study for *Xf* detection at the species and subspecies level.**

| Target species                                            | Primers and probe name | Sequence (5'-3')                    | Amplicon size (bp) | Position (reference genome) |
|-----------------------------------------------------------|------------------------|-------------------------------------|--------------------|-----------------------------|
| <i>X. fastidiosa</i>                                      |                        |                                     |                    |                             |
|                                                           | <i>XF-F</i>            | AACCTGCGTGACTCTGGTTT                | 118                | 1,254,770 (M23)             |
|                                                           | <i>XF-R</i>            | CATGTTTCGCTGCTTGGTCC                |                    | 1,254,868                   |
|                                                           | <i>XF-P</i>            | FAM-GCTCAGGCTGACGGTTTCACAGTGCA-BHQ1 |                    | 1,254,836                   |
| <i>X. fastidiosa</i> subsp. <i>fastidiosa</i>             |                        |                                     |                    |                             |
|                                                           | <i>XFF-F</i>           | TTACATCGTTTTTCGCGCACG               | 100                | 2,477,405 (M23)             |
|                                                           | <i>XFF-R</i>           | TCGGTTGATCGCAATACCCA                |                    | 2,477,435                   |
|                                                           | <i>XFF-P</i>           | HEX-CCCGACTCGGCGCGGTTCCA-BHQ1       |                    | 2,477,485                   |
| <i>X. fastidiosa</i> subsp. <i>fastidiosa</i> sensu largo |                        |                                     |                    |                             |
|                                                           | <i>XFFSL-F</i>         | TAGTATGCGTGCGAGCGAC                 | 75                 | 719,396 (M23)               |
|                                                           | <i>XFFSL-R</i>         | CGCAATGCACACCTAAGCAA                |                    | 719,451                     |
|                                                           | <i>XFFSL-P</i>         | HEX-CGCGTACCCACTCACGCCGC-BHQ1       |                    | 719,417                     |
| <i>X. fastidiosa</i> subsp. <i>multiplex</i>              |                        |                                     |                    |                             |
|                                                           | <i>XFM-F</i>           | ACGATGTTTGAGCCGTTTGC                | 88                 | 1,826,193 (M12)             |
|                                                           | <i>XFM-R</i>           | TGTCACCCACTACGAAACGG                |                    | 1,826,261                   |
|                                                           | <i>XFM-P</i>           | ROX-ACGCAGCCCACCACGATTTAGCCG-BHQ2   |                    | 1,826,236                   |
| <i>X. fastidiosa</i> subsp. <i>morus</i>                  |                        |                                     |                    |                             |
|                                                           | <i>XFMO-F</i>          | TAACGCTATCGGCAGGTAGC                | 123                | 1,908,399 (MUL0034)         |
|                                                           | <i>XFMO-R</i>          | GCATCAGCTTCACGTCTCCT                |                    | 1,908,502                   |
|                                                           | <i>XFMO-P</i>          | CY5-GGTTCCGCACCTCACATATCCGCC-BHQ2   |                    | 1,908,482                   |



---

*X. fastidiosa* subsp. *pauca*

|              |                                |     |                    |
|--------------|--------------------------------|-----|--------------------|
| <i>XFP-F</i> | TGCGTTTTTCCTAGGTGGCAT          |     | 338,221 (De Donno) |
| <i>XFP-R</i> | GTTGGAACCTTGAATGCGCA           | 154 | 338,355            |
| <i>XFP-P</i> | CY5- CCAAAGGGCGGCCACCTCGC-BHQ2 |     | 338,332            |

---

793

794

795  
796  
797

**Table 4: Efficiency of the primer and probe sets in simplex qPCR assays on extracted DNA of bacterial strains in comparison with the Harper's test (Harper *et al.*, 2010). A, Mean Ct value for each primer and probe set on target strains; B, Percentage of efficiency and standard curve parameters of each primer and probe set on target strains.**

798 **A.**

Mean Ct value (SEM) for each primer and probe set (target strain code)

| DNA concentration       | Theoretical number of genome copy.mL <sup>-1</sup> | XF (CFBP 7970)               | XFF (CFBP 7970) | XFM (CFBP 8416) | XFMO (CFBP 8084) | XFP (CFBP 8402) | XFFSL (CFBP 7970) | XFFSL (CFBP 8084) | Harper's (CFBP 7970)         | Harper's (CFBP 8416) | Harper's (CFBP 8084) | Harper's (CFBP 8402) |
|-------------------------|----------------------------------------------------|------------------------------|-----------------|-----------------|------------------|-----------------|-------------------|-------------------|------------------------------|----------------------|----------------------|----------------------|
| 1 µg.mL <sup>-1</sup>   | 4x10 <sup>8</sup>                                  | 20.03 <sup>a</sup><br>(0.08) | 18.47<br>(0.16) | 19.34<br>(0.04) | 19.09<br>(0.03)  | 16.64<br>(0.12) | 18.67<br>(0.01)   | 18.94<br>(0.04)   | 17.82<br>(0.02)              | 17.36<br>(0.05)      | 17.80<br>(0.04)      | 16.58<br>(0.04)      |
| 100 ng.mL <sup>-1</sup> | 4x10 <sup>7</sup>                                  | 23.31<br>(0.10)              | 21.88<br>(0.07) | 22.80<br>(0.10) | 22.78<br>(0.10)  | 19.63<br>(0.06) | 22.09<br>(0.05)   | 23.10<br>(0.08)   | 21.45<br>(0.33)              | 21.03<br>(0.09)      | 22.13<br>(0.34)      | 19.23<br>(0.03)      |
| 10 ng.mL <sup>-1</sup>  | 4x10 <sup>6</sup>                                  | 26.56<br>(0.03)              | 25.49<br>(0.06) | 26.18<br>(0.09) | 25.91<br>(0.07)  | 22.93<br>(0.10) | 26.84<br>(1.01)   | 27.55<br>(0.06)   | 25.88<br>(0.06)              | 25.35<br>(0.12)      | 25.55<br>(1.55)      | 22.76<br>(0.04)      |
| 1 ng.mL <sup>-1</sup>   | 4x10 <sup>5</sup>                                  | 30.22<br>(0.19)              | 28.65<br>(0.07) | 29.06<br>(0.12) | 28.89<br>(0.08)  | 25.95<br>(0.07) | 28.61<br>(0.24)   | 30.78<br>(0.04)   | 29.98<br>(0.16) <sup>a</sup> | 29.02<br>(0.11)      | 29.36<br>(0.11)      | 25.77<br>(0.15)      |
| 100 pg.mL <sup>-1</sup> | 4x10 <sup>4</sup>                                  | 33.36<br>(0.43)              | 31.57<br>(0.18) | 32.42<br>(0.37) | 32.18<br>(0.20)  | 28.95<br>(0.08) | 31.82<br>(0.85)   | 33.44<br>(0.16)   | na                           | na                   | 32.53<br>(0.20)      | 31.55<br>(0.16)      |
| 10 pg.mL <sup>-1</sup>  | 4x10 <sup>3</sup>                                  | 36.28<br>(1.36)              | na              | 37.37<br>(0.72) | 36.07<br>(0.59)  | 31.82<br>(0.59) | 33.86<br>(3.63)   | 38.52<br>(0.08)   | na                           | na                   | na                   | 34.28<br>(0.73)      |
| 1 pg.mL <sup>-1</sup>   | 4x10 <sup>2</sup>                                  | na <sup>b</sup>              | na              | na              | na               | na              | na                | na                | na                           | na                   | na                   | na                   |

799 <sup>a</sup>: a signal is considered positive when obtained in at least two of the three technical repetitions and the lowest concentration at which a signal is obtained  
800 is the LOD

801 <sup>b</sup>: not detected

802

803 **B.**

| Target | Strain code | Efficiency | R <sup>2</sup> | Slope  |
|--------|-------------|------------|----------------|--------|
| XF     | CFBP 7970   | 101.4%     | 0.978          | -3.289 |
| XFF    | CFBP 7970   | 101.1%     | 0.997          | -3.297 |
| XFM    | CFBP 8416   | 100.4%     | 0.995          | -3.311 |
| XFMO   | CFBP 8084   | 100.0%     | 0.996          | -3.299 |
| XFP    | CFBP 8402   | 112.6%     | 0.995          | -3.052 |
| XFFSL  | CFBP 7970   | 95.5%      | 0.996          | -3.434 |
| XFFSL  | CFBP 8084   | 102.0%     | 0.957          | -3.274 |

804

805  
806

**Table 5: Limit of detection (LOD) of *X. fastidiosa* strains in spiked matrices using the tetraplex qPCR assay XF – XFFSL – XFM – XFP (set n°1) in comparison with the reference test (Harper’s test, Harper et al., 2010).**

| Spiked strains (subsp.)                                           | XF                                          |         | XFFSL                          |                 | XFM                            |         | XFP                            |                   | Harper’s test                  |         |
|-------------------------------------------------------------------|---------------------------------------------|---------|--------------------------------|-----------------|--------------------------------|---------|--------------------------------|-------------------|--------------------------------|---------|
|                                                                   | LOD <sup>a</sup><br>(CFU.mL <sup>-1</sup> ) | Mean Ct | LOD<br>(CFU.mL <sup>-1</sup> ) | Mean Ct         | LOD<br>(CFU.mL <sup>-1</sup> ) | Mean Ct | LOD<br>(CFU.mL <sup>-1</sup> ) | Mean Ct           | LOD<br>(CFU.mL <sup>-1</sup> ) | Mean Ct |
| <i>Cistus monspeliensis</i>                                       |                                             |         |                                |                 |                                |         |                                |                   |                                |         |
| CFBP 7970 ( <i>fastidiosa</i> )                                   | 1x10 <sup>4</sup>                           | 26.06   | 1x10 <sup>4</sup>              | 37.87           |                                | na      |                                | na                | 1x10 <sup>2</sup>              | 36.37   |
| CFBP 8416 ( <i>multiplex</i> )                                    | 1x10 <sup>5</sup>                           | 29.11   |                                | na <sup>c</sup> | 1x10 <sup>4</sup>              | 30.14   |                                | na                | 1x10 <sup>3</sup>              | 36.48   |
| <i>Citrus clementina</i>                                          |                                             |         |                                |                 |                                |         |                                |                   |                                |         |
| CFBP 8402 ( <i>pauca</i> )                                        | 1x10 <sup>4</sup>                           | 27.17   |                                | na              |                                | na      | 1x10 <sup>3</sup>              | 27.53             | 1x10 <sup>2</sup>              | 37.26   |
| CFBP 8416 ( <i>multiplex</i> )                                    | 1x10 <sup>4</sup>                           | 26.40   |                                | na              | 1x10 <sup>3</sup>              | 28.63   |                                | na                | 1x10 <sup>3</sup>              | 31.72   |
| <i>Helichrysum italicum</i>                                       |                                             |         |                                |                 |                                |         |                                |                   |                                |         |
| CFBP 8416 ( <i>multiplex</i> )                                    | 1x10 <sup>3</sup>                           | 30.02   |                                | na              | 1x10 <sup>3</sup>              | 31.06   |                                | na                | 1x10 <sup>3</sup>              | 32.96   |
| <i>Lavandula angustifolia</i>                                     |                                             |         |                                |                 |                                |         |                                |                   |                                |         |
| CFBP 8402 ( <i>pauca</i> )                                        | 1x10 <sup>4</sup>                           | 27.64   |                                | na              |                                | na      | 1x10 <sup>4</sup>              | 26.90             | 1x10 <sup>3</sup>              | 33.04   |
| CFBP 8416 ( <i>multiplex</i> )                                    | 1x10 <sup>4</sup>                           | 27.09   |                                | na              | 1x10 <sup>4</sup>              | 27.92   |                                | na                | 1x10 <sup>3</sup>              | 33.71   |
| <i>Nerium oleander</i>                                            |                                             |         |                                |                 |                                |         |                                |                   |                                |         |
| CFBP 8402 ( <i>pauca</i> )                                        | 1x10 <sup>4</sup>                           | 35.12   |                                | na              |                                | na      | 1x10 <sup>4</sup>              | 27.26             | 1x10 <sup>3</sup>              | 35.86   |
| CFBP 8416 ( <i>multiplex</i> )                                    | 1x10 <sup>4</sup>                           | 28.74   |                                | na              | 1x10 <sup>4</sup>              | 26.84   |                                | na                | 1x10 <sup>3</sup>              | 35.15   |
| CFBP 8402 ( <i>pauca</i> )<br>+ CFBP 8416<br>( <i>multiplex</i> ) | 1x10 <sup>4</sup>                           | 28.40   |                                | na              | 5x10 <sup>3</sup>              | 29.25   |                                | 5x10 <sup>4</sup> | 1x10 <sup>3</sup>              | 36.02   |
| <i>Olea europaea</i> <sup>b</sup>                                 |                                             |         |                                |                 |                                |         |                                |                   |                                |         |
| CFBP 8402 ( <i>pauca</i> )                                        | 1x10 <sup>5</sup>                           | 24.87   |                                | na              |                                | na      | 1x10 <sup>4</sup>              | 25.44             | 1x10 <sup>3</sup>              | 33.71   |
|                                                                   | 1x10 <sup>6</sup>                           | 26.06   |                                | na              |                                | na      | 1x10 <sup>6</sup>              | 25.63             | 1x10 <sup>4</sup>              | 34.70   |
| CFBP 8416 ( <i>multiplex</i> )                                    | 1x10 <sup>5</sup>                           | 25.02   |                                | na              | 1x10 <sup>5</sup>              | 25.23   |                                | na                | 1x10 <sup>3</sup>              | 36.10   |
|                                                                   | 1x10 <sup>5</sup>                           | 28.69   |                                | na              | 1x10 <sup>5</sup>              | 30.08   |                                | na                | 1x10 <sup>4</sup>              | 35.00   |
| CFBP 8402 ( <i>pauca</i> )<br>+ CFBP 8416<br>( <i>multiplex</i> ) | 1x10 <sup>6</sup>                           | 25.91   |                                | na              | 5x10 <sup>5</sup>              | 26.46   |                                | 5x10 <sup>5</sup> | 1x10 <sup>6</sup>              | 32.26   |
|                                                                   | 1x10 <sup>6</sup>                           | 26.08   |                                | na              | 5x10 <sup>5</sup>              | 27.02   |                                | 5x10 <sup>5</sup> | 1x10 <sup>4</sup>              | 33.91   |
| <i>Polygala myrtifolia</i> <sup>b</sup>                           |                                             |         |                                |                 |                                |         |                                |                   |                                |         |
| CFBP 7970 ( <i>fastidiosa</i> )                                   | 1x10 <sup>5</sup>                           | 26.94   | 1x10 <sup>4</sup>              | 29.98           |                                | na      |                                | na                | 1x10 <sup>3</sup>              | 37.47   |
|                                                                   | 1x10 <sup>5</sup>                           | 27.33   | 1x10 <sup>5</sup>              | 28.45           |                                | na      |                                | na                | 1x10 <sup>3</sup>              | 36.51   |
| CFBP 8084 ( <i>morus</i> )                                        | 1x10 <sup>3</sup>                           | 29.63   | 1x10 <sup>3</sup>              | 27.53           |                                | na      |                                | na                | 1x10 <sup>3</sup>              | 32.53   |

*in planta* identification of *Xylella fastidiosa* subspecies

|                                                                                                        |                   |       |                      |       |                      |       |                      |       |                   |       |
|--------------------------------------------------------------------------------------------------------|-------------------|-------|----------------------|-------|----------------------|-------|----------------------|-------|-------------------|-------|
|                                                                                                        | 1x10 <sup>4</sup> | 29.77 | 1x10 <sup>4</sup>    | 29.46 |                      | na    |                      | na    | 1x10 <sup>3</sup> | 35.17 |
| CFBP 8402 ( <i>pauca</i> )                                                                             | 1x10 <sup>4</sup> | 27.64 |                      | na    |                      | na    | 1x10 <sup>4</sup>    | 26.32 | 1x10 <sup>3</sup> | 33.84 |
|                                                                                                        | 1x10 <sup>4</sup> | 29.99 |                      | na    |                      | na    | 1x10 <sup>4</sup>    | 25.74 | 1x10 <sup>3</sup> | 32.89 |
|                                                                                                        | 1x10 <sup>4</sup> | 29.62 |                      | na    | 1x10 <sup>4</sup>    | 28.29 |                      | na    | 1x10 <sup>3</sup> | 33.17 |
| CFBP 8416 ( <i>multiplex</i> )                                                                         | 1x10 <sup>5</sup> | 27.09 |                      | na    | 1x10 <sup>5</sup>    | 26.60 |                      | na    | 1x10 <sup>3</sup> | 36.67 |
|                                                                                                        | 1x10 <sup>5</sup> | 26.04 | 3.33x10 <sup>4</sup> | 35.87 | 3.33x10 <sup>4</sup> | 27.20 | 3.33x10 <sup>4</sup> | 25.34 | 1x10 <sup>3</sup> | 36.23 |
| CFBP 7970 ( <i>fastidiosa</i> )<br>+ CFBP 8402 ( <i>pauca</i> )<br>+ CFBP 8416<br>( <i>multiplex</i> ) | 1x10 <sup>5</sup> | 26.45 | 3.33x10 <sup>5</sup> | 31.80 | 3.33x10 <sup>4</sup> | 27.10 | 3.33x10 <sup>4</sup> | 25.19 | 1x10 <sup>4</sup> | 33.36 |
| <i>Prunus cerasus</i> <sup>b</sup>                                                                     |                   |       |                      |       |                      |       |                      |       |                   |       |
| CFBP 7970 ( <i>fastidiosa</i> )                                                                        | 1x10 <sup>4</sup> | 31.08 | 1x10 <sup>4</sup>    | 35.46 |                      | na    |                      | na    | 1x10 <sup>3</sup> | 35.69 |
|                                                                                                        | 1x10 <sup>5</sup> | 27.46 | 1x10 <sup>5</sup>    | 33.38 |                      | na    |                      | na    | 1x10 <sup>5</sup> | 31.80 |
| CFBP 8416 ( <i>multiplex</i> )                                                                         | 1x10 <sup>5</sup> | 28.31 |                      | na    | 1x10 <sup>5</sup>    | 32.11 |                      | na    | 1x10 <sup>4</sup> | 36.42 |
|                                                                                                        | 1x10 <sup>6</sup> | 31.04 |                      | na    | 1x10 <sup>6</sup>    | 38.46 |                      | na    | 1x10 <sup>5</sup> | 34.41 |
| <i>Prunus dulcis</i> <sup>b</sup>                                                                      |                   |       |                      |       |                      |       |                      |       |                   |       |
| CFBP 7970 ( <i>fastidiosa</i> )                                                                        | 1x10 <sup>4</sup> | 29.77 | 1x10 <sup>4</sup>    | 32.74 |                      | na    |                      | na    | 1x10 <sup>4</sup> | 34.65 |
|                                                                                                        | 1x10 <sup>5</sup> | 28.23 | 1x10 <sup>4</sup>    | 33.61 |                      | na    |                      | na    | 1x10 <sup>3</sup> | 36.70 |
| CFBP 8402 ( <i>pauca</i> )                                                                             | 1x10 <sup>4</sup> | 31.15 |                      | na    |                      | na    | 1x10 <sup>4</sup>    | 29.87 | 1x10 <sup>4</sup> | 35.08 |
|                                                                                                        | 1x10 <sup>5</sup> | 27.73 |                      | na    |                      | na    | 1x10 <sup>4</sup>    | 29.13 | 1x10 <sup>4</sup> | 32.38 |
| CFBP 8416 ( <i>multiplex</i> )                                                                         | 1x10 <sup>5</sup> | 28.89 |                      | na    | 1x10 <sup>4</sup>    | 33.14 |                      | na    | 1x10 <sup>4</sup> | 37.17 |
|                                                                                                        | 1x10 <sup>5</sup> | 28.90 |                      | na    | 1x10 <sup>5</sup>    | 31.56 |                      | na    | 1x10 <sup>4</sup> | 35.71 |
| CFBP 7970 ( <i>fastidiosa</i> )<br>+ CFBP 8402 ( <i>pauca</i> )<br>+ CFBP 8416<br>( <i>multiplex</i> ) | 1x10 <sup>5</sup> | 29.01 | 3.33x10 <sup>4</sup> | 33.61 | 3.33x10 <sup>4</sup> | 30.67 | 3.33x10 <sup>3</sup> | 28.19 | 1x10 <sup>4</sup> | 35.89 |
|                                                                                                        | 1x10 <sup>5</sup> | 27.68 | 3.33x10 <sup>4</sup> | 35.13 | 3.33x10 <sup>5</sup> | 27.51 | 3.33x10 <sup>4</sup> | 28.78 | 1x10 <sup>4</sup> | 35.71 |
| <i>Quercus ilex</i>                                                                                    |                   |       |                      |       |                      |       |                      |       |                   |       |
| CFBP 8416 ( <i>multiplex</i> )                                                                         | 1x10 <sup>4</sup> | 24.87 |                      | na    | 1x10 <sup>4</sup>    | 27.15 |                      | na    | 1x10 <sup>2</sup> | 36.26 |
|                                                                                                        | 1x10 <sup>5</sup> | 26.08 |                      | na    | 1x10 <sup>4</sup>    | 27.33 |                      | na    | 1x10 <sup>2</sup> | 36.72 |
| <i>Quercus robur</i>                                                                                   |                   |       |                      |       |                      |       |                      |       |                   |       |
| CFBP 8416 ( <i>multiplex</i> )                                                                         | 1x10 <sup>5</sup> | 26.44 |                      | na    | 1x10 <sup>4</sup>    | 28.07 |                      | na    | 1x10 <sup>3</sup> | 37.05 |
| <i>Rosmarinus officinalis</i>                                                                          |                   |       |                      |       |                      |       |                      |       |                   |       |
| CFBP 8416 ( <i>multiplex</i> )                                                                         | 1x10 <sup>4</sup> | 29.31 |                      | na    | 1x10 <sup>4</sup>    | 27.38 |                      | na    | 1x10 <sup>3</sup> | 32.55 |
| <i>Vitis vinifera</i> <sup>b</sup>                                                                     |                   |       |                      |       |                      |       |                      |       |                   |       |
| CFBP 7970 ( <i>fastidiosa</i> )                                                                        | 1x10 <sup>3</sup> | 28.08 | 1x10 <sup>3</sup>    | 31.33 |                      | na    |                      | na    | 1x10 <sup>2</sup> | 37.65 |
|                                                                                                        | 1x10 <sup>5</sup> | 30.46 | 1x10 <sup>5</sup>    | 29.94 |                      | na    |                      | na    | 1x10 <sup>4</sup> | 35.78 |

|                                |                   |       |    |                   |       |    |                   |       |
|--------------------------------|-------------------|-------|----|-------------------|-------|----|-------------------|-------|
| CFBP 8416 ( <i>multiplex</i> ) | 1x10 <sup>3</sup> | 28.75 | na | 1x10 <sup>3</sup> | 30.66 | na | 1x10 <sup>3</sup> | 33.41 |
|                                | 1x10 <sup>5</sup> | 28.07 | na | 1x10 <sup>5</sup> | 28.07 | na | 1x10 <sup>4</sup> | 35.31 |

---

807 <sup>a</sup>: spiked concentration based on OD<sub>600nm</sub> = 0.1 corresponding to 1x10<sup>8</sup> CFU.ml<sup>-1</sup>

808 <sup>b</sup>: experiments were performed in triplicate and in two independent experiments.

809 <sup>c</sup>: not amplified

810

811  
812

**Table 6: Detection of *X. fastidiosa* in environmental plant samples with low population sizes using the tetraplex qPCR assay set n° 1 in comparison with the reference test (Harper's test, Harper et al., 2010).**

| Sample | Host plant                    | Place (year)                 | Mean Ct (SEM) <sup>a</sup> |              |              |     |               | typing                                       |
|--------|-------------------------------|------------------------------|----------------------------|--------------|--------------|-----|---------------|----------------------------------------------|
|        |                               |                              | XF                         | XFFSL        | XFM          | XFP | Harper's test |                                              |
| 1      | <i>Centranthus trinervis</i>  | Bonifaccio, France (2017)    | na <sup>b</sup>            | 33.67 (1.42) | na           | na  | 34.97 (0.53)  | unknown                                      |
| 2      | <i>Helichrysum italicum</i>   | Propriano, France (2017)     | 27.35 (0.67)               | na           | 27.25 (0.23) | na  | 30.85 (0.04)  | unknown                                      |
| 3      | <i>Lavandula stoechas</i>     | Vignola, France (2017)       | 30.75 (0.73)               | na           | 26.27 (0.38) | na  | 29.50 (0.13)  | unknown                                      |
| 4      | <i>Lavandula stoechas</i>     | Propriano, France (2017)     | na                         | na           | na           | na  | 34.81 (1.40)  | unknown                                      |
| 5      | <i>Olea europaea</i>          | Afa, France (2017)           | na                         | na           | na           | na  | 34.01 (0.77)  | unknown                                      |
| 6      | <i>Olea europaea</i>          | Vignola, France (2017)       | na                         | 29.91 (0.80) | na           | na  | 32.94 (0.18)  | unknown                                      |
| 7      | <i>Phyllirea angustifolia</i> | Bonifaccio, France (2017)    | na                         | 30.52 (0.21) | na           | na  | 33.99 (1.09)  | unknown                                      |
| 8      | <i>Polygala myrtifolia</i>    | Vignola, France (2017)       | 24.86 (0.04)               | na           | 25.00 (0.03) | na  | 25.96 (0.04)  | suspected <i>Xfm</i> <sup>c</sup><br>leuA: 3 |
| 9      | <i>Polygala myrtifolia</i>    | Porto-Vecchio, France (2018) | 30.14 (0.58)               | na           | 29.52 (0.17) | na  | 32.82 (0.41)  | unknown                                      |
| 10     | <i>Spartium junceum</i>       | Corbara, France (2017)       | 23.68 (0.17)               | na           | 23.97 (0.14) | na  | 24.97 (0.06)  | unknown                                      |

813 <sup>a</sup>: none of these test was performed by the French national reference laboratory

814 <sup>b</sup>:not amplified

815 <sup>c</sup>: typing is suspected when the seven housekeeping genes could not be amplified

816  
817

**Table 7: Detection of *X. fastidiosa* in inoculated plants using the tetraplex qPCR assay (set n° 1) in comparison with the reference test (Harper's test, Harper et al., 2010).**

| Sample | Host plant                              | Spiked strain (subsp.)          | Mean Ct (SEM) |              |              |     |               |
|--------|-----------------------------------------|---------------------------------|---------------|--------------|--------------|-----|---------------|
|        |                                         |                                 | XF            | XFFSL        | XFM          | XFP | Harper's test |
| 10     | <i>Olea europaea</i> cv Capanaccia      | CFBP 7970 ( <i>fastidiosa</i> ) | na            | 26.57 (0.09) | na           | na  | 28.90 (0.04)  |
| 11     | <i>Prunus armeniaca</i> var Bergeron    | CFBP 7970 ( <i>fastidiosa</i> ) | 24.65 (1.79)  | 26.14 (1.66) | na           | na  | 28.33 (0.63)  |
| 12     | <i>Vitis vinifera</i> cv Chardonnay     | CFBP 7970 ( <i>fastidiosa</i> ) | na            | 24.20 (0.04) | na           | na  | 27.86 (0.61)  |
| 13     | <i>Vitis vinifera</i> cv Chardonnay     | CFBP 8077 ( <i>sandyi</i> )     | 20.04 (0.26)  | 21.78 (0.28) | na           | na  | 23.81 (0.07)  |
| 14     | <i>Prunus armeniaca</i> var Bergeron    | CFBP 8418 ( <i>multiplex</i> )  | na            | na           | 28.83 (0.31) | na  | 31.92 (0.09)  |
| 15     | <i>Olea europaea</i> cv Sabine          | CFBP 8416 ( <i>multiplex</i> )  | na            | na           | 23.21 (0.24) | na  | 27.84 (0.12)  |
| 16     | <i>Olea europaea</i> cv Sabine          | CFBP 8416 ( <i>multiplex</i> )  | 23.71 (2.08)  | na           | 23.68 (0.70) | na  | 25.92 (0.04)  |
| 17     | <i>Vitis vinifera</i> cv Cabernet Franc | CFBP 8416 ( <i>multiplex</i> )  | 19.49 (1.25)  | na           | 21.01 (0.64) | na  | 23.19 (0.07)  |

*in planta* identification of *Xylella fastidiosa* subspecies

|    |                                            |                            |              |    |    |              |              |
|----|--------------------------------------------|----------------------------|--------------|----|----|--------------|--------------|
| 18 | <i>Olea europaea</i> cv Aglandau           | CFBP 8402 ( <i>pauca</i> ) | 23.66 (0.14) | na | na | 23.75 (0.06) | 25.86 (0.02) |
| 19 | <i>Vitis vinifera</i> cv<br>Cabernet Franc | CFBP 8402 ( <i>pauca</i> ) | 20.62 (0.21) | na | na | 21.26 (0.13) | 23.50 (0.06) |

---

818
