# Supplementary material for: Novel tetraplex qPCR assays for simultaneous detection and identification of Xylella fastidiosa subspecies in plant tissues
Source: bioRxiv preprint, doi:10.1101/699371, version 2 (2019-12-03)
Supplement: Supplemental data 1 [file 699371_file02.xlsx]

## Sheet: Data sup 1 list Kmer Xffsl
mer size	first pb position	last pb position	Mer sequence	Strain ID
235	91809	92043	ATGGAGCCGTGCGCCAGATCATTCCTGAGTTGTTTCACAAAGGCCAGTGGCCCTAGGTCATTCCGAAAAGGCTGCTTGATGGCTTGATAGACGCGCTTGTTTATCTTCAATTCCAGGCCCACTCGTTCAATGACATTTTCGATCTCACGGTCATCCCAATTGCCAGCGTTGGCCTTTTCAATCGTGAAGGTATCAATGGGTGATGCAGCCAACAGATGATTGCAAAGCTGCAACG	JQAP01000004.1 Xylella fastidiosa strain ATCC 35879 contig4, whole genome shotgun sequence
228	190016	190243	GAGCAGTTGACTTCATCTGATTGGCGACTATGGTCCGATGCAAGCTTTGACTGTTGTATCGCAAGTGATATCCACTTCTCACAGCTAAGCCAATATTCCCAGGTTAATTCTGTACTGCATTAATGTCACTTGGCTTGCTTTACTATCGGAATCGCCATCTTTCGAGTTCTTTTCAAGACTCTCTTATAGTGGGAAGCCGCTTCAATCAGCGGGTTAGATAGAAATCGT	JQAP01000001.1 Xylella fastidiosa strain ATCC 35879 contig1, whole genome shotgun sequence
227	92045	92271	GCTATCCAGTCTCTTGTTTGGTTCCAATGTAGTATGCGTGCGAGCGACCACGCGTACCCACTCACGCCGCATTGCATCATTCAGTTGCTTAGGTGTGCATTGCGCATTTCCTTTGACAGCCTCCGCAACGGCTTTAATACAGTGAGAAATGGTGGCCTCGACAAGGTTGTACAACTGCAGATACACGCTTGAATAAAGGATTTTTTGTTGTTGGGGGGTAATAGGAT	JQAP01000004.1 Xylella fastidiosa strain ATCC 35879 contig4, whole genome shotgun sequence
213	19336	19548	CACCAGCGATCACATGATGTGTGTGTCATTGTCTCTCTTCAAGGCAGTCGATACATTGTTGGGCAACGGCAACGGCAACGGCAACGGCAACGGCAACGGCAACGGCAACGGCAACGGCAACGGCAACGGCAACGGCAACGGCAACGGCAACGGCAACGGCAACGGCAACGGCAACGGCAACGGCAACGGCAACGGCAACGGCAACGGCAACGC	JQAP01000001.1 Xylella fastidiosa strain ATCC 35879 contig1, whole genome shotgun sequence
205	188490	188694	TGTTCGTAAGGATTTTTATTTTTTAGTGCGTCACTTTAACGAAGGCACGTTAAGGACAGTTTTTGTTTGAATGCTCATCGGCATTCTGGAAGCTCCAGGTGATGCATCGCAGGAATAGTACTGATACTGTGATCTGGAGATAAAAGGAAAAAAGCCCCCTTCCCGATGGGAGTCGATCAGGAAGAGGGACAGATAAACTAAGATC	JQAP01000001.1 Xylella fastidiosa strain ATCC 35879 contig1, whole genome shotgun sequence
171	254667	254837	TTCTCTATTTTTGCGATTGCTGATAACGGCAGCGGCGTGCCCTGTGTTTGAGAGTACACCAGCGTGTCGCCTGGATTCCCCTGCGCGGTGCGCTCCATTGCATTGCCACGCAATACGATCGGTGCGGCAACCCCATCATCGCGGATCAGCGAAGCGTTCACACCGCTGTAG	JQAP01000001.1 Xylella fastidiosa strain ATCC 35879 contig1, whole genome shotgun sequence
168	91078	91245	TCATCCTTGGAACATGCTGCTGTGAAAGTTCCAGTCCTTGAGAACCTAGCCTGGATGCAAGTAGCACCAAGCGCTTACGTGTCTGCGGAACACCGATGGATGCACATTCCACGATATGCCACCACGTCTTATAGCCAGAAAGACTCTTTAGAAACTGTTGAAAGACCG	JQAP01000004.1 Xylella fastidiosa strain ATCC 35879 contig4, whole genome shotgun sequence
153	150001	150153	TTTTACTGCTGATGGTTCAAAGGTCATTGCGGCCGCCAATACCCTACAATCTCAGGTTAAGGGTGGTCTCAAGAATGGTAAAAACAGTCTGGCAGCTATCAAAGTTGGTAAGTTAATTGCTGAGCGTGCTAGGGCTGTTGGTGTGGATAGGAT	JQAP01000002.1 Xylella fastidiosa strain ATCC 35879 contig2, whole genome shotgun sequence
144	364949	365092	CAGATCAATGCACTCTCTAATGATGGAAAAATTGCAGCAGGGACTTCTGAGATTGATACTGTTACCAAAGAGGTTTACCAACAAGCAACCATCTGGTCAGGAGAAAACTGGGCAACAAAAACACGCTTAGGATCACTAAGAAGC	JQAP01000004.1 Xylella fastidiosa strain ATCC 35879 contig4, whole genome shotgun sequence
144	397958	398101	CATACCGATTTCTGGAAAGGTGATCTAAGTAAGTGGCTGGAATAGGGAGATCCTTGGAAAATGTCAATTTAAATACTGACTATATTTGTATCAGTACGGGATTTTTTCAAACTGACCTTGTGGTATTGATGATGCAGTATTCTA	JQAP01000004.1 Xylella fastidiosa strain ATCC 35879 contig4, whole genome shotgun sequence
141	177402	177542	CAGGCTGGCCGGAGCAAGATGCGTATGGATGTTCTCCCCTGCAAGCACCTGACCGGACGCATAGTCCATCACAACCCATGCTTTGGCTGAAGCAGGCGCTGGCGCCTTGGGAATGGGTATTGCAGGAGCTGGAGCAGGGAC	JQAP01000014.1 Xylella fastidiosa strain ATCC 35879 contig14, whole genome shotgun sequence
137	90675	90811	TTAAACCGATAGGCTTCTCGGGTATATCCCTACATTCTTCAAGTCAATTCTATATTCTAGAAATAACAGCTCTAACTAGAGCTAAAACTAGCATCTCCTAATACCACATTAAATGCCCGTAGACGCGCCTCATTCGC	JQAP01000012.1 Xylella fastidiosa strain ATCC 35879 contig12, whole genome shotgun sequence
133	156555	156687	AAGCGACCTCATTATGCAACCGCCTTCATGTGAATGAAGGGTGTGTATGTTGCATTGACATTAAACTGTTGTGTGCCCCATTAGTATGATCTTTCTTATAAGATCTCCTAACTGTGACCCATCGGCAATTCAT	JQAP01000002.1 Xylella fastidiosa strain ATCC 35879 contig2, whole genome shotgun sequence
131	156454	156584	AGGTGTCGGAAGCATCCAGGCAAGGTGGTTGAGATGAATCAGGGCATTCAGCAGAGGGATTGCAGCAAGAAGGAAGGATCAGTATCAAGGTGGGAGGATTTTGCGAGGTCAAGGGTATCAATACAACTGTA	JQAP01000015.1 Xylella fastidiosa strain ATCC 35879 contig15, whole genome shotgun sequence
126	160752	160877	GTCCAGCGTACTCAAAGAGTGTGGATTAATTAAAGTCATCAAATTTTAATCTTTAACACTTTTGTTGTTTTTATCTCATCAAAATTCATCTTTTTTTCTATAAATCATTATTTCGGAGCTGCTTTT	JQAP01000002.1 Xylella fastidiosa strain ATCC 35879 contig2, whole genome shotgun sequence
125	157615	157739	ATCGGTAGCTGTCTAGCTGTCTAGCTGTCTAGCTGTCTAGCTGTCTAGCTGTCTAGCTGTCTAGCTGTCTAGCTGTCTAGCTGTCTAGCTGTCTAGCTGTCTAGCTGTCTAGCTGTCTAGCTGTC	JQAP01000015.1 Xylella fastidiosa strain ATCC 35879 contig15, whole genome shotgun sequence
122	161604	161725	CCGTTACGTAGCGGCTGTTGCTCCCGATCTTGTTGCTTCGTTGACGACTATTGGTACGCCTCATCATGGTTCGGAATTGGCAGATTACTTTGAGGAGCTGTTGAATAAGAATCCAATTAGGC	JQAP01000002.1 Xylella fastidiosa strain ATCC 35879 contig2, whole genome shotgun sequence
121	262383	262503	TACGAGCACGCTGCTCAATGGCCTGGCTGTGTTCCGACGGCACCGGCAACGTTGCATGTGCAGGTCCTTGCTGGCGAGATTTACCGTCTGCAAAACCTCAATGGCACCGCCTTCGGCTTTT	JQAP01000014.1 Xylella fastidiosa strain ATCC 35879 contig14, whole genome shotgun sequence
120	178289	178408	GAATTTATATAAATTATGAATGGTTTATCATTTTTCCTGAGTCGATATTTTAGTATAAAAAATCAGCATTTAGATGTTTATGACTCTAAAGAATTTTATTTTATAAACTGTTTAAAACAT	JQAP01000001.1 Xylella fastidiosa strain ATCC 35879 contig1, whole genome shotgun sequence
119	186752	186870	ATTCATCAGTAATGCCTTGGCAAGGGCAGGTGCATGCTGTTTCTACTCTGCTGACGCCAAGATGACGAGAGCGAAATAATCGCTTCGTTGTTCAGTGACTCTAAATCAGTCAGTGCAAG	JQAP01000001.1 Xylella fastidiosa strain ATCC 35879 contig1, whole genome shotgun sequence
115	384586	384700	GGTAGGATGCATATCCGCAGGCAGTGAAGATGCACTACGCATCTGAGCCAGCACTTTATTTGCTCTGCGAAGCTTGGAATAAGTAGGAATCAAGGCAACCACAAGAACCAAACTG	JQAP01000014.1 Xylella fastidiosa strain ATCC 35879 contig14, whole genome shotgun sequence
114	31117	31230	GTGAATAGGTGTTGCAGGTGTGGTTTGCTACCGAGGGTTTCTGAATCGATTGAATTCGGTCTAGTGGATTGACCTTCTGGGGGTAGGTTAGTAATGGGCGGTGTATATACGCAT	JQAP01000002.1 Xylella fastidiosa strain ATCC 35879 contig2, whole genome shotgun sequence
112	365421	365532	AGCCAACACAGTAAGCTCGTTATTGCGCTTGAATGCATCAAGCTTTTTACTCATAGAGTGACCTTGTTATAAGAGTGGCCCGCCTGCAGCAGCGCTGCAAATAGAGATAAGC	JQAP01000004.1 Xylella fastidiosa strain ATCC 35879 contig4, whole genome shotgun sequence
112	592998	593109	GATGTGACCAAGCGTAAGCGCTTGTACTGATCTGTTACACAACATACGCCGCATCTTTGTCTGTTTTGCTCCACACAATCGGCGCAACCGATAGAGGCACTTCCCACGGCAG	JQAP01000014.1 Xylella fastidiosa strain ATCC 35879 contig14, whole genome shotgun sequence
111	91316	91426	GAAGGCAAGCACCAAGGGCCACTGCGAGGCATACGCGTTATTCCGCCGACTACGGCTGTAAGCCGAGAACGGTTGGCATGGTGCGCATCCGGCAAGCAAGGTGATGTCGGC	JQAP01000004.1 Xylella fastidiosa strain ATCC 35879 contig4, whole genome shotgun sequence
110	491881	491990	AGAGCTACTGGGCCCTAGACATGGTACTTAGCTACCGCCTGAACGAACACCTGGATCTACGGCTGAACAGCTACAACTTGTTAAATAAAGACTACGTCGCAGCGATCAAC	JQAP01000014.1 Xylella fastidiosa strain ATCC 35879 contig14, whole genome shotgun sequence
109	210046	210154	CCTGATTGGAGGGCTAACGACATTCTCCTCTCTGATGGTGGAGTGTTTGGTGTTTGTCCGTTCCGAGCGCTCGCTGATAGTCGGTTTTTACTTATGTATCACTTTACTG	JQAP01000004.1 Xylella fastidiosa strain ATCC 35879 contig4, whole genome shotgun sequence
109	373721	373829	AAACATCCTCGTATCTCACCCATCCTGAGCGATAACGCAGCAAGCGAATCAACGCAGCCGGTGAATGATGACGCACTGCGGACCTGTGCCATGTCCAGCCGTCCCACAT	JQAP01000014.1 Xylella fastidiosa strain ATCC 35879 contig14, whole genome shotgun sequence
108	18574	18681	ACCAGCCGCAATCAAACGCATTACAATATCGGGGAAACCAAGCGCAGCGGCCAACATCAGTACCGTCATCTCCTCCGGAAAACGGTATTCAAGTGGAGCACCTGCGTC	JQAP01000014.1 Xylella fastidiosa strain ATCC 35879 contig14, whole genome shotgun sequence
107	190424	190530	TAATGCTTCTCTGTTGAGGATTACGATGGATTGTGATCGTCTCTCCATAGATCAGTGTGTGGGTGGCTATTGGGTGGGGGATGGATGAAAGATTCAGTGTTCGTCAC	JQAP01000001.1 Xylella fastidiosa strain ATCC 35879 contig1, whole genome shotgun sequence
107	373598	373704	GTAACGAGTCAGCCATCACCTAGTGATGCAATCTGTCTTTTTATTGCTCTCTTCCCCCTACATACTTAGGTGCATAGGGTATAGGAGCTGCAGCAATCGCTGTCAGC	JQAP01000014.1 Xylella fastidiosa strain ATCC 35879 contig14, whole genome shotgun sequence
107	390383	390489	GGGGTTGGTCATTTGCATGGATGATCCAGACGGTTGGATGTTGGTCTTTGTTTTTTGTGTCGAGATAGCTGAATTGACCGTTGCGTTTGCTGTGGTAAGAGCGTTGA	JQAP01000001.1 Xylella fastidiosa strain ATCC 35879 contig1, whole genome shotgun sequence
106	365314	365419	GGATGCAAAAGGCCGACGTGCAGTTCTTTGGAAAATCATTTATCCAGCAGCATCATCGGAAAGCGGATCAAATGCCCCAAACTCTGCTCACATTCACTTGCCGATG	JQAP01000004.1 Xylella fastidiosa strain ATCC 35879 contig4, whole genome shotgun sequence
104	160204	160307	TGGATGAGCAAGGGGCAGCGGATTAAGTGACCATGGGACGTGAGCAGTGATGGTGTGCTGTGTGCAATTTTTTGGGTGAGCGGCGGATGGTGTCGGTATGTGGT	JQAP01000004.1 Xylella fastidiosa strain ATCC 35879 contig4, whole genome shotgun sequence
104	337237	337340	CACCCCAGACACCACCCACACATTCCCCCCTTGAAGACAGCCGTGCAAGCCCCCTCCCTCGCTCACCTCACCGCTTGCCTGCACCCCACCCACAAAACAGCACA	JQAP01000014.1 Xylella fastidiosa strain ATCC 35879 contig14, whole genome shotgun sequence
104	358879	358982	AAGATCATGCCTTGCCACAGAAGATAGGGCCTGGAACCCCGCGATTTACCTATCACTGAAACCGGAAATCAATTTTGATCGGTAAACCATCACAACATCTTAAA	JQAP01000004.1 Xylella fastidiosa strain ATCC 35879 contig4, whole genome shotgun sequence
103	90813	90915	AAACACACCAACATAATCTGTCAAGCTGATTAGAGTCTCAAAAAGAAATAACAAAGCACTTGATATACACACTCGAAAAACAACATCAAAATACTTAGTAACT	JQAP01000012.1 Xylella fastidiosa strain ATCC 35879 contig12, whole genome shotgun sequence
103	90828	90930	GTGGTGATGGTCGGTGCTGGCTGATCCCATTCCATACGACCGTAGACGCTTGGATAGGTGGCCCCAGTGTCTTTGCAATGGCACGCTGCCCGCAGTGCTGCGG	JQAP01000004.1 Xylella fastidiosa strain ATCC 35879 contig4, whole genome shotgun sequence
103	164860	164962	TAGTGTGCCGATGACACGTGCCGTGGTGCTTGTGTTGGGTGTTACCTTCAAGGAAGATTGCCCCGATTTACGTAACAGCCGCGCTTTGGATTTGGTGCGCATG	JQAP01000002.1 Xylella fastidiosa strain ATCC 35879 contig2, whole genome shotgun sequence
103	195124	195226	AGCGTGGGCAGCGCTCAGGGTCCGGCGCATGCGGGCCAGGACCCAAGCAAGGTTGACCGCGGTTGGGCGTGCGGCATGGAGACGTTGTAATGCGGGTTCTAGC	JQAP01000015.1 Xylella fastidiosa strain ATCC 35879 contig15, whole genome shotgun sequence
103	370495	370597	CACAGTAGTGGTGAATAGGAGTGTGGTCAGTTCAGTGCAGATCGCATCGACGGGGATGTCCCAGGCTTCAGTTGGCAGTGCGCTGACTTGCTGTACTGTGAAG	JQAP01000004.1 Xylella fastidiosa strain ATCC 35879 contig4, whole genome shotgun sequence
102	49485	49586	TTATGGTGATCGTGGTGTGGGCCAATTTTATTAAATGGTAAATTTAATCAATGAATTAGAAAACATGATGCGTGTGATGATCTATTGATAGATAAGGTATTT	JQAP01000001.1 Xylella fastidiosa strain ATCC 35879 contig1, whole genome shotgun sequence
102	81730	81831	CAGAACGAAGATGTCACCCTGACCGTGGCCTGTGAAACCTGACGCAAGATGCTGGTTGGGCTGGAGGCGGCTCAGTTTGTGGAAGAGTTGGCGGCGTGCATT	JQAP01000012.1 Xylella fastidiosa strain ATCC 35879 contig12, whole genome shotgun sequence
101	190549	190649	AATCATCGGGAGAAAGTAGATTACTGATCTCCTCGGGGGCCTGCATCTCAATGACCATAATCCAGCCTTCACCGTAGGGGTCTTCATTGATCGTCTCAGGT	JQAP01000001.1 Xylella fastidiosa strain ATCC 35879 contig1, whole genome shotgun sequence
101	767252	767352	GCTCGCTCAACCAAGGACTGTGATAACCATCCACAACCCAAACAACCTTAAAGCGACACCGTCCCCTCCCAGAACGTCTAGCGGGACAAACAAACCGCAAC	JQAP01000014.1 Xylella fastidiosa strain ATCC 35879 contig14, whole genome shotgun sequence
100	1188	1287	ATTAGCTAAAGAGCTGACTGAGCATAGCTTGCCTGAAATTGGAGACGCTTTTGCAGGCCGAGATCATACAACAGTGTTGCATGCTTGCCGTCAAATCAAG	JQAP01000001.1 Xylella fastidiosa strain ATCC 35879 contig1, whole genome shotgun sequence
100	170539	170638	TATGGATCCATCCCATAGCCCGGATCTGCCAGTACAACAGATAAAAGCGTTCTACTATCCACGGGATAAATTTGACCGTGTCAGGTTAGAACGCCCTGAT	JQAP01000015.1 Xylella fastidiosa strain ATCC 35879 contig15, whole genome shotgun sequence
100	197850	197949	GCAATTGGCTGCGTCACTGTCCGGGCATCCGCACGTTGCTGACGTGCGCCAGACCGGGATGGTCGTGGCATTTGAGTTAACTCGTGACGGCAACAAGCGG	JQAP01000001.1 Xylella fastidiosa strain ATCC 35879 contig1, whole genome shotgun sequence
98	165865	165962	CAATGCAATCTTTGAGCTTCCCGCGAAGCAACAAAAAAAGCGCCGTCAGGGCACCTTGCTCATTCACCAGCACCTCAATCATCACCAAGGACTGGCAA	JQAP01000015.1 Xylella fastidiosa strain ATCC 35879 contig15, whole genome shotgun sequence
97	90609	90705	TGCACATGCCTGACGAGTGAACGAGCGATGACCTCGCCCAGCCGCACTGGTACCGCATTCCCGATCAGACGTCCCATGGTATTCACCGTGATCGGAG	JQAP01000004.1 Xylella fastidiosa strain ATCC 35879 contig4, whole genome shotgun sequence
97	161972	162068	AATCACTCTTCGGTACCAATGTTATCGATACAAGTGTGATTCCTTTTATTGATCTTGCAAATTTTGTCGATCCAACTACAAAAGCGTTGTATCGATT	JQAP01000002.1 Xylella fastidiosa strain ATCC 35879 contig2, whole genome shotgun sequence
96	68818	68913	TCATTCCATCGTAAGAGAACGCAAAACGTATATCTCTCGCATTCATCGGTTCGAGACCAGCGACTAGATCATCAGGCATAAGCTACTGGTGATAGC	JQAP01000012.1 Xylella fastidiosa strain ATCC 35879 contig12, whole genome shotgun sequence
96	123824	123919	CCTGATTGCTGCTCTTACTCCGATAGGATCTCCAACAACCATCGCAACGCGGCAACCTAAATCTCCTACCATTACAACCACAAATGCCTCCGAAAC	JQAP01000014.1 Xylella fastidiosa strain ATCC 35879 contig14, whole genome shotgun sequence
96	150297	150392	ATCGCCAGCCGATCACTGCCCGGGGCATAGTATTCGACGAGCGGCAGGGTTTTGACGCCACTGCCTGGTATTGGAGTCGCTATGTGAGACTGCACT	JQAP01000015.1 Xylella fastidiosa strain ATCC 35879 contig15, whole genome shotgun sequence
95	54253	54347	TTTTGACCCAATTCTGACTGGGAAAACAATAAACGTCTTTTGCTGGGTGATAAGGGAAGCGGATGATTGCTATTGAGTAAGCGTTGGAAAATAGG	JQAP01000004.1 Xylella fastidiosa strain ATCC 35879 contig4, whole genome shotgun sequence
95	142735	142829	TTCTGAGTGTTCTGTAATTGGGGCGGGGTAAGGTTTTACACAAAGCGGGGGATCTCTCGAATGTGATGGACCAATTGCTATTTTGTGTCTTTGTC	JQAP01000001.1 Xylella fastidiosa strain ATCC 35879 contig1, whole genome shotgun sequence
94	352991	353084	TCGGCCAGGCATGATGAGGTGTTGCAGCGGCGGGATGTAGATACGGTCGCGGCAGACGATGCACGCAGCTGCAGAGGTGCGCGATATGGTCGGC	JQAP01000014.1 Xylella fastidiosa strain ATCC 35879 contig14, whole genome shotgun sequence
93	210241	210333	TCACCATAGGAGTCAACAATACATAGAAAAACCCAGCTGTAGCGAAACGCAGCATAGTAAGATTTATCCGCCGGATGGAAAGTGATTGCAGTT	JQAP01000002.1 Xylella fastidiosa strain ATCC 35879 contig2, whole genome shotgun sequence
92	359281	359372	CCTAGGGATGGACACCCACACACCCACGGGCAAGCTGATGTTGACCGTGCTGGGTGGCGTGGTGCAGTTCAAGCGGGAGATGATGTTGGAGC	JQAP01000004.1 Xylella fastidiosa strain ATCC 35879 contig4, whole genome shotgun sequence
92	687864	687955	TCATGCAGTTCCTGTAGCTACTAGCTATATCCCTAACGTCTGCGACATCTTCTAGAAAACACCTTTATTGCACCAGCCTCAACGTAGATAAG	JQAP01000014.1 Xylella fastidiosa strain ATCC 35879 contig14, whole genome shotgun sequence
91	161727	161817	GTTGTCAACGGCGCTGGGTGGCCTCAGTAATGCGTTTGCTTCGATAACAACCGCTAATCTGAATCAGGATATGTTTGCTGCGTTAAAGAGT	JQAP01000002.1 Xylella fastidiosa strain ATCC 35879 contig2, whole genome shotgun sequence
91	185172	185262	CCCGTTCGAGATGAAGCGTTTTATTGTTGAATTGTTAGAGCTGATTGGCAAGCCGCCGTCTGTCGCGGTCTTTGGTACAGGCGAGACACAA	JQAP01000002.1 Xylella fastidiosa strain ATCC 35879 contig2, whole genome shotgun sequence
91	230364	230454	CTGCAACGTGCTTGGGAAAGGATCGATTACACATCTTCATGCCAGCCCTACTCCAACCACCACACAGCACGACGTATAGTAGCTATAGGTG	JQAP01000014.1 Xylella fastidiosa strain ATCC 35879 contig14, whole genome shotgun sequence
91	338435	338525	TACGCGAGAGCAAACCCAAGAGCAATGGGATTTTCTCCTCCTCAGCAGGGAAATAAATACGTTGACGGACACGCGTAGTAGTGACACTCTC	JQAP01000015.1 Xylella fastidiosa strain ATCC 35879 contig15, whole genome shotgun sequence
90	126000	126089	TTTTGGTAGGTATTACGATCCATTTCTTTAAGTAATAAATTCGCTTCTATACTTTTTACTCGACCTGCTGCATCTGTCACATACGCATGG	JQAP01000014.1 Xylella fastidiosa strain ATCC 35879 contig14, whole genome shotgun sequence
90	202570	202659	TAATATGGCAATTCAACTATTACATGCAATGGTTTGCAATCTTGGTTTTTTCAAGTATTGCGTGTGGTTTCATCGCGATATCATGTCTGT	JQAP01000002.1 Xylella fastidiosa strain ATCC 35879 contig2, whole genome shotgun sequence
89	1896	1984	TGCTGGCAGAAAAAATGCACCACCGCTGTACTAAACGCTTAGCCAACTATCCTCCCTACGCCAAACAACACGCGTTTCACGTGATGGGC	JQAP01000004.1 Xylella fastidiosa strain ATCC 35879 contig4, whole genome shotgun sequence
89	615470	615558	ATCTGATGTTGGTCAGCAGAGCGCAACGCCAATAATATTTTGAGAATGCAGATGCGTCGGCAAAACACTGAATCGCAGCAACGGATCAC	JQAP01000014.1 Xylella fastidiosa strain ATCC 35879 contig14, whole genome shotgun sequence
88	57522	57609	ACCAACCTTGGGCCTGGACATTCTTTACCGCAAACAATTCTACAGGCACCTGCAGGAATACTACTTTGACGAACAAAGAACCATCCTG	JQAP01000014.1 Xylella fastidiosa strain ATCC 35879 contig14, whole genome shotgun sequence
88	92315	92402	ATCCATCACCGTCAGCAACTCAAGATAGGCATTCACTTCTTCGAGTCGTTCTTGGAATGCAATCCTTAGTTTGCTGCTCATTTACTTT	JQAP01000004.1 Xylella fastidiosa strain ATCC 35879 contig4, whole genome shotgun sequence
88	123644	123731	AGACGACAACCCAATGCTCCTGGCCCGGCATGACAAACGCATCGCACCGACAACAGCAAATCCGGTGGCCACGACCATGGCCCCAATG	JQAP01000014.1 Xylella fastidiosa strain ATCC 35879 contig14, whole genome shotgun sequence
88	125319	125406	GTGTTTCAGGAAGGTTCTCCCTGTGTTTTTCTGCTTGTCCAAGTATGGTTAACGTGCTTGGACAGATATCCAGGCAGGAGGTGAAGCC	JQAP01000004.1 Xylella fastidiosa strain ATCC 35879 contig4, whole genome shotgun sequence
86	35280	35365	CTATTTTGCGTGATGCATTCCGGTGCTGTTGCATAAGCAAGAAACTATATTATTATTCCAGATTCTAGTAACTTGATCGTTTTTTC	JQAP01000016.1 Xylella fastidiosa strain ATCC 35879 contig16, whole genome shotgun sequence
86	186391	186476	CTCGCGCAAGCATCAGTTGACTGATGAAGTAAGTATGCTGCATCTCCCTGTTCAGTCCTTCCAAGTAGAAGTCCAGGCCGCATTCG	JQAP01000001.1 Xylella fastidiosa strain ATCC 35879 contig1, whole genome shotgun sequence
86	210337	210422	CAACGTCTTCATGTTTAGGTGTTGCGGATACGCGATTGCATTGGATTTTTGCGCCATTTTCACGGTGTCTCAACGTATGATGCAAT	JQAP01000004.1 Xylella fastidiosa strain ATCC 35879 contig4, whole genome shotgun sequence
85	3839	3923	TCCAGTATTCCTGGAGTTCATTTTTTATCTCGTGGACAAGGAAAACTTATAACATTGATGTGCCTACTAGCTCAGGCGCAGGACT	JQAP01000001.1 Xylella fastidiosa strain ATCC 35879 contig1, whole genome shotgun sequence
85	35119	35203	CTCGCGCTCCCCCGCATCAAGAGCAGCACGGAACAGATCGCACAAATCTAATACTGCCTGCTCCGCAATTTCCGGATCACGGCGC	JQAP01000014.1 Xylella fastidiosa strain ATCC 35879 contig14, whole genome shotgun sequence
85	70559	70643	AAGGACGAAAGCCGATCAAAATGCCAAGGGTTGGGCCTTAAAAGGCTCCTTCGCCTTTCAACCAAATTGGAGCGTGTTCGGTGAC	JQAP01000012.1 Xylella fastidiosa strain ATCC 35879 contig12, whole genome shotgun sequence
85	120065	120149	TGACCATAGTCGTGCGTGTGCGTTTTTGATCGTCGATGGGGTGCTTCCGTCCAATGAAGGCCGTGGTTATGTCTTACGTCGGATC	JQAP01000001.1 Xylella fastidiosa strain ATCC 35879 contig1, whole genome shotgun sequence
85	156366	156450	CGATGAGTGATGAAATGGAATACGGCCAATCTAAATGTGCCGATGTTGCGGTCGCTGATTCCTGTGCTGGTTTCGATGCGGTTTC	JQAP01000004.1 Xylella fastidiosa strain ATCC 35879 contig4, whole genome shotgun sequence
85	169983	170067	AGTTCGTTTAAACGCACTATCGCGCCGTGGCAAAGGCCTGCAAACCCGAGTATTGGAAACAGGTGATCTCGAATATAACCTGGAC	JQAP01000015.1 Xylella fastidiosa strain ATCC 35879 contig15, whole genome shotgun sequence
85	334795	334879	AGTCACTGCCCCCATCATCCGACTCGCCCAGCTATGGCAGGATTTTCAACAAGTCGGACTCTCTGTCGAACGACTCGGCGAAATT	JQAP01000014.1 Xylella fastidiosa strain ATCC 35879 contig14, whole genome shotgun sequence
85	613422	613506	GGTCAACCAAGGCCAAGCCTCTAAGATGGTGATTGACTCGAGTGCGCGCGTCCTATCCACGCTAGAACAGCAGCGTGCCCAATTT	JQAP01000014.1 Xylella fastidiosa strain ATCC 35879 contig14, whole genome shotgun sequence
84	90993	91076	AAAGACGCGGCGGTGTGCAGCGCGTCTTGAGGATCACGCTCCCCTGCATGAATGGGAGGAAGAGAGCCAATGGCCTCACGGACC	JQAP01000004.1 Xylella fastidiosa strain ATCC 35879 contig4, whole genome shotgun sequence
84	165050	165133	AAGTTGCTTCTTGTCGGCCCAAGCAGTGCCATAGATGCGCTGCAACTGCTCATTCTTTGTGTTACCACGCCAGTAAGCACCAGA	JQAP01000015.1 Xylella fastidiosa strain ATCC 35879 contig15, whole genome shotgun sequence
84	189710	189793	GTTATTGAGCAGTTGAAAATTAGATCCATAATTCTGCCCTGATGAGTGGATGTAGGGTGAAATTGCGCAAAAAATTTCCACGTT	JQAP01000001.1 Xylella fastidiosa strain ATCC 35879 contig1, whole genome shotgun sequence
84	290297	290380	TTACTGAATTACCCCGCCATTTAGGATGCAAGGAATGCAGCACATTACTTGGAGTCACCCTCCCCTTCTTCTGCAGGAGCGTCA	JQAP01000015.1 Xylella fastidiosa strain ATCC 35879 contig15, whole genome shotgun sequence
83	63237	63319	CTTGGTGACGGAATTTTAGTGCAGGCCTCATTTGCAATGGGATTTACAGGGATACAGTTACCGGTATTTTGATGCTTGATTTT	JQAP01000001.1 Xylella fastidiosa strain ATCC 35879 contig1, whole genome shotgun sequence
83	284236	284318	GGGCCAGCGTCTTGGAACCAATCGGCTCACCGTTCTGGATGTAGCATGAAATCAACGTCCGTAACAATTGTCGGGATCGGGAA	JQAP01000014.1 Xylella fastidiosa strain ATCC 35879 contig14, whole genome shotgun sequence
83	333206	333288	CGACTTCTTCGGCTTTGCCCAAGCGCCGCATTGGTACTGAGTTGGCGAGACGGTCAAGGACATCTGGGGGGAAACTGCTGATT	JQAP01000001.1 Xylella fastidiosa strain ATCC 35879 contig1, whole genome shotgun sequence
83	487695	487777	AAAGTCGCCTCTGTTGGAGGCGCAGCGACACGTGTTACATTTCAAGGCAACTACAATGCTAGTGCTAGCGTCTCCTATGACGA	JQAP01000004.1 Xylella fastidiosa strain ATCC 35879 contig4, whole genome shotgun sequence
82	44031	44112	GTTTTTATTGGATGAGCCGTTATCCAATTTAGACGCAAAACTGCGTAACAGTGTGCGTTCTGATATCACGCGTCTGCATCGC	JQAP01000002.1 Xylella fastidiosa strain ATCC 35879 contig2, whole genome shotgun sequence
82	90298	90379	TGCCCAGAGGCAGGCGTTCCACGTTGGCTGCGATGCGTTTTTACGCAAACCGGTCACCGGCGAGATGCTGGAGCAGGTGCTC	JQAP01000004.1 Xylella fastidiosa strain ATCC 35879 contig4, whole genome shotgun sequence
82	115767	115848	GATCGCTCCAGAACACCCACTTGCCCTACATGCAGCTAAATCTAACCCTGGGTTAGCCGGGCTGCTGACCCAGATGAAACAA	JQAP01000014.1 Xylella fastidiosa strain ATCC 35879 contig14, whole genome shotgun sequence
82	284904	284985	TTCAATAAACTTGGCCTTAGTGGCCGTTTTTAGAATCTTAATCGCTTCATCAATCCCATACGCCTTACCAGGGACAACAGCG	JQAP01000015.1 Xylella fastidiosa strain ATCC 35879 contig15, whole genome shotgun sequence
82	288517	288598	ACTACACAACCAATTCAGAAGCCTGCTTTACAACAAACTTACCATCGAAAAAATATACGGCAAAAATGCATTTAGGCAGCAA	JQAP01000015.1 Xylella fastidiosa strain ATCC 35879 contig15, whole genome shotgun sequence
82	303169	303250	GATTCTCTCTACGGGTGCACGTTGGCGTCAGATGAATGTGCCTGGTGAGGATGAGTATCGAAACAAGGGGGTTGCTTATTGT	JQAP01000004.1 Xylella fastidiosa strain ATCC 35879 contig4, whole genome shotgun sequence
82	330497	330578	ATAGCGTTTGATCCCCTCTCGTATCTCTTGGTCGTCCAATACATTGACATGCGCGTACTCAACACCAAGTGCCTGGAGAATG	JQAP01000014.1 Xylella fastidiosa strain ATCC 35879 contig14, whole genome shotgun sequence
82	444907	444988	CAAAAAAAGTCAGTTCAGTTTGTTTGCGTGCTACTTCAACCCTGGAGAAAGCTTCGACCAGGAGTGCATCATCAACCTCTCT	JQAP01000004.1 Xylella fastidiosa strain ATCC 35879 contig4, whole genome shotgun sequence
81	169251	169331	CCCTACCTTCGATTGGCTGCATCGCTGTGGAAGGCCACAAATGGGAGACAAGTTAGACAACTGTTCCTAAAACGCCATCCA	JQAP01000015.1 Xylella fastidiosa strain ATCC 35879 contig15, whole genome shotgun sequence
81	196840	196920	AGCGCTGCATTAACTGACATGTAGTTCAGTGTTCTTCCCTGTGTGGCAATATTTCATATGCGTATCAAACTGCTTTCTTAA	JQAP01000002.1 Xylella fastidiosa strain ATCC 35879 contig2, whole genome shotgun sequence
81	373107	373187	GAGGCATGGGATGGTCCACGTTCCGGGTACGATGGCGCAATCGAGCAGTACGGCATGGATGATGCGTATCCGATTGATGAT	JQAP01000004.1 Xylella fastidiosa strain ATCC 35879 contig4, whole genome shotgun sequence
80	24712	24791	CCAATCCAGAACATACAAATATTGACCTCAGCATATTCAGACCTGTTCGAGCACACCCTTTTAGCACAGTGATTTCTATT	JQAP01000014.1 Xylella fastidiosa strain ATCC 35879 contig14, whole genome shotgun sequence
80	177544	177623	GGCTGCGGAACCTGCGCAACAGCCGAACTCACCGCACACATGAAAGTAGCAACAGTCGCAAACAGGAATTTCACCGAGAT	JQAP01000014.1 Xylella fastidiosa strain ATCC 35879 contig14, whole genome shotgun sequence
80	249753	249832	TCAATCTCTGTTTTGCCGTGTTTCCAAAAAGCTAAAATAATGTTGGGTTGATGATCTGATTTAAGGGTAATGCTGGACTG	JQAP01000004.1 Xylella fastidiosa strain ATCC 35879 contig4, whole genome shotgun sequence
80	364322	364401	AAGACCATGGCGTGGAATTATGATTTTACAGGGCCATCTGGTGCTTTCCCTTCCTCTTCCCAGTCCAATGCGACTATACA	JQAP01000004.1 Xylella fastidiosa strain ATCC 35879 contig4, whole genome shotgun sequence
80	383586	383665	AATCAACGCCGATTGACCACGCACCGAGGGCTTCGCTTTGAGCTGGCTACCAAGATAAACACGCGCTTGTGCTGGTCCTT	JQAP01000014.1 Xylella fastidiosa strain ATCC 35879 contig14, whole genome shotgun sequence
79	46394	46472	GTACGGCCAATGTTTCTTGCTTGTATGGACGTGGTGCTTCGGTTACCACTTGTGCAACGGTATCCGGCATATTGCGCAG	JQAP01000002.1 Xylella fastidiosa strain ATCC 35879 contig2, whole genome shotgun sequence
79	68160	68238	CCTACATGATGATTTCAAGCGACCGGTTTAAATAATAAAAATTTAGAATCTGCGTCTTCAAAGACTATAACGCCCGTCG	JQAP01000012.1 Xylella fastidiosa strain ATCC 35879 contig12, whole genome shotgun sequence
79	115072	115150	CCGTGTAAGACGTGTGTGCGATTATTTTCCAGAAGATGCCTCGTGGAAAAACACAATGAGGTATGAGTTGGGCACTGCT	JQAP01000001.1 Xylella fastidiosa strain ATCC 35879 contig1, whole genome shotgun sequence
79	166763	166841	TTCAGTGTTTTCGTTGGCGCAGCAATGGTTCTTGGAGGAGTCGCATGGAAACTATTAGTGGGTCAGCGTCGGCGTACTC	JQAP01000015.1 Xylella fastidiosa strain ATCC 35879 contig15, whole genome shotgun sequence
79	189286	189364	ATAGAAATATCCTTATCGAATACCGATATGGCTGCTTCAGCGACATCGACATATCGTGGACTGAAGCCAACGAATGACA	JQAP01000001.1 Xylella fastidiosa strain ATCC 35879 contig1, whole genome shotgun sequence
79	209932	210010	ATGGGGAACGTTGGCAGTGAATCTGATTGGTTCATTCGTCGCAGGCTTCTTGCTGATCTGGGTGGATAAACGGGGATCG	JQAP01000004.1 Xylella fastidiosa strain ATCC 35879 contig4, whole genome shotgun sequence
79	285642	285720	TAGAAAAACTCAGCTTTTTTGAACCTGACCAAAGTCAAGGTCAACAGGTGTAGGACGACCAAAAATCAGTACCGCCACA	JQAP01000015.1 Xylella fastidiosa strain ATCC 35879 contig15, whole genome shotgun sequence
79	292796	292874	GCCAAAGCCGCCACCAACTGGGATTCGCTTTTCAACAAAGATATCTGCCCCTAAATAGACATTAGTCGCATGTTTTAGC	JQAP01000015.1 Xylella fastidiosa strain ATCC 35879 contig15, whole genome shotgun sequence
79	316609	316687	ATATTGATGAATTCCGATGTCAAAAATAACCAGAAAAAATCACACAATCAACCAGCAGAGATAGCTATATATTTTCTAT	JQAP01000015.1 Xylella fastidiosa strain ATCC 35879 contig15, whole genome shotgun sequence
78	61269	61346	AAGGCGATTAGCATCAATGTGCCGAACATCAGTAGGGCGTTGCGTGGTGAAACGGTCCCGGTGACCAAGGGGCGTGTG	JQAP01000001.1 Xylella fastidiosa strain ATCC 35879 contig1, whole genome shotgun sequence
78	210548	210625	GCTGCATTATAATTGTGTGTCGCTGGGGGTATTGAAGATGATTTCTATTTTCTGGTGTTGATGTGCTGTGTTATTTGC	JQAP01000002.1 Xylella fastidiosa strain ATCC 35879 contig2, whole genome shotgun sequence
78	321916	321993	AAGCCTGTACGCGTGGCCACACAATACGCCAACGAAGAAGATACAGGCGGAAAAGCCCCCCAATACAACCGATACCCG	JQAP01000015.1 Xylella fastidiosa strain ATCC 35879 contig15, whole genome shotgun sequence
78	337448	337525	ATGACCATCGGAGTACTGCTTACTAACATTATCGAAACTAAGGACACTCATGCACGTAATCATATCGAAGCATCGTAA	JQAP01000015.1 Xylella fastidiosa strain ATCC 35879 contig15, whole genome shotgun sequence
77	265	341	CGACCTAAAACAACAGAACTAACCGTACCAGTAGATACTACAGGACGTTTGTCTCAAACAGTCCCATTTAACGGAAA	JQAP01000001.1 Xylella fastidiosa strain ATCC 35879 contig1, whole genome shotgun sequence
77	189618	189694	GGCTTTTTTAAAGCATTTTTTCTGCATGGTTTGGATCTTGCAGCTATGGCTGAGGCCAGAGCTGCGTGTGTGAATCA	JQAP01000001.1 Xylella fastidiosa strain ATCC 35879 contig1, whole genome shotgun sequence
77	284786	284862	GAACAAACACAGCGACACGTACATCCCTACCAGTTCCAGCGGGCAACAAAGTCGAGCCTCGGACCTGTTGATCCGAC	JQAP01000015.1 Xylella fastidiosa strain ATCC 35879 contig15, whole genome shotgun sequence
77	734552	734628	GGGAGCATAAGTCAGTCACAAGACATGCCATTAGGCTATCATCAATGCTTCATATTATTGATGCGTGCCACGCAAAC	JQAP01000014.1 Xylella fastidiosa strain ATCC 35879 contig14, whole genome shotgun sequence
76	2444	2519	GGCGGCAATTTTATCTAACGAGAAATATCGTGGTGTGCGTATTGAAGTTTCACCTGGGCAGTTAAAAATTAATGCA	JQAP01000001.1 Xylella fastidiosa strain ATCC 35879 contig1, whole genome shotgun sequence
76	3773	3848	TTTTGTGAGAGCTGCCGATGTTCCAATGAGTCCACTGTGTGAGTATGTCTGGATTCACCACAGGAAGTTCGACGAA	JQAP01000002.1 Xylella fastidiosa strain ATCC 35879 contig2, whole genome shotgun sequence
76	39549	39624	CTCCATTCATAAACAAACGTTATGGTACCTGACCATTGAGTTATGTCAGTACTGTTAGGTATAGAGGTATAGCGCT	JQAP01000014.1 Xylella fastidiosa strain ATCC 35879 contig14, whole genome shotgun sequence
76	77335	77410	GCGTTTAGTGCGCCAGCGTCAGGCCGAGCATGCTGATCTTGATCAATTGCTGGTGCGTGCTGATGAGGCTTATGTC	JQAP01000004.1 Xylella fastidiosa strain ATCC 35879 contig4, whole genome shotgun sequence
76	178622	178697	AATCAAAAGATGCTCAGACGGAACAACACAACCTTCCTTGACATAGTTCCGGAATCCATCAGCAAACGGCTCCAGA	JQAP01000014.1 Xylella fastidiosa strain ATCC 35879 contig14, whole genome shotgun sequence
76	252456	252531	ACGACTGCCTGGAAAACCGCTACGCCTGCTTGGTGGTCGCCCACTGATTCACAGGGTAGCCGAACGGGCACTTAGT	JQAP01000014.1 Xylella fastidiosa strain ATCC 35879 contig14, whole genome shotgun sequence
76	407660	407735	GTGATAGGCATTTCAGGATACGGCCGTGCCGCCATCACCACACCTAGCGATGGGTGCGGGTCCCACTGCGCCTGCA	JQAP01000004.1 Xylella fastidiosa strain ATCC 35879 contig4, whole genome shotgun sequence
76	440216	440291	AGGGTGTGTTTTTTCGTTTTACAAATAAAAGATTGTCTCTCGGTATATACATTTTGCACTCGTAGCTATTGATTTG	JQAP01000004.1 Xylella fastidiosa strain ATCC 35879 contig4, whole genome shotgun sequence
75	147601	147675	GTGGTTGTTTCTAATGTTAATTTTGTTAAACGGCACACAAAGCCCAATCCTCAGCGGGGTATTTCTGGTGGCTTA	JQAP01000002.1 Xylella fastidiosa strain ATCC 35879 contig2, whole genome shotgun sequence
75	174601	174675	TTCCAGCCTCGTATGCCACCCTGCATTCGGAAAAAATAAGATGCTGCATGAAGAGGAGCGCGTGCTATCAGGCAA	JQAP01000004.1 Xylella fastidiosa strain ATCC 35879 contig4, whole genome shotgun sequence
75	174772	174846	TTTCGCCGCATGGTGTAGCGCCGCGTCGCCGTCGTCGATTCCTTTTACTTCAGAGAAGCGTTGATTTATCTGTGC	JQAP01000004.1 Xylella fastidiosa strain ATCC 35879 contig4, whole genome shotgun sequence
75	249552	249626	GTCACTCTTTTTTGTGTATGAACCATTTTATAAATGGTTATAATATTGTTTGAGAGCTTATAACGTATAATTCAT	JQAP01000004.1 Xylella fastidiosa strain ATCC 35879 contig4, whole genome shotgun sequence
75	262654	262728	ATGACCAAGCCTGCCAATCCCACAAAAGCACAACAACGGTTTGGCCCCAACCGACTTGAAGAAAGAGATTAAACG	JQAP01000015.1 Xylella fastidiosa strain ATCC 35879 contig15, whole genome shotgun sequence
75	288405	288479	GGTATCCCTCCTGATTTTCACAACCACAAGCAACCAGGAAATTATTTCATTTCGAGCGATTGAAAAGCCATTCAT	JQAP01000015.1 Xylella fastidiosa strain ATCC 35879 contig15, whole genome shotgun sequence
75	374072	374146	CTGCACAGCACGCCTTCGCCAGGTCGAAGAGAGTTGACATGCGTGCCAAATGCTCCTTGTGCGTCGGCTCGCCAC	JQAP01000014.1 Xylella fastidiosa strain ATCC 35879 contig14, whole genome shotgun sequence
75	609982	610056	GAGGGATGGACGACTTCGTAGTTCCCCAACACAGTCATGAAATCACGCCCGGCAGCACCCCAGGTATGGAGTAGG	JQAP01000014.1 Xylella fastidiosa strain ATCC 35879 contig14, whole genome shotgun sequence
75	611021	611095	CAATCGCTTTAATACCTGGACAGACTAGTCGCCGTGCCATTCACAAAATTGAACAATATTAACATATTTTTTATG	JQAP01000014.1 Xylella fastidiosa strain ATCC 35879 contig14, whole genome shotgun sequence
75	658540	658614	GCAGTACGATTCTCCTTATTAGCTATTTCCTGGTCATCCAGGTAGCGGTAGGTCTTCACTGTGCCAGACAATTCA	JQAP01000014.1 Xylella fastidiosa strain ATCC 35879 contig14, whole genome shotgun sequence
74	106946	107019	CAGAAGCATGTACAGGATTACCAACCACTTCACCCAAACCAGTGACATGCTGTGGAATGCCGACACGCACCGGC	JQAP01000015.1 Xylella fastidiosa strain ATCC 35879 contig15, whole genome shotgun sequence
74	162388	162461	GTAAAGCCCTTCGCATCATGCATTATGACTGATGAGTTATGCCGCAAGCATGGTTTTCGCCTTTTCAGCAAGGG	JQAP01000015.1 Xylella fastidiosa strain ATCC 35879 contig15, whole genome shotgun sequence
74	249849	249922	GGTAGTGCAACTGCAGAGATTCATGTTGCGAGTGGTTTCTTGAGCCAACGGGTGAGTTTTACTTTATGTTGGCG	JQAP01000004.1 Xylella fastidiosa strain ATCC 35879 contig4, whole genome shotgun sequence
73	101925	101997	CATCCCTGGATAAACCACACCAACGCTCAAACCTAACCAGTTGTACAGTCTTCCCATATGAGCGGCATCGCGG	JQAP01000015.1 Xylella fastidiosa strain ATCC 35879 contig15, whole genome shotgun sequence
73	106093	106165	GTGGACAGTGCCAAGCGCGTCACTGCATTGGAGCAGCGTCATCGCGATTTTTTGGTTGAGCTTGGGTTAGATG	JQAP01000002.1 Xylella fastidiosa strain ATCC 35879 contig2, whole genome shotgun sequence
73	123921	123993	ACACCACCTAGTGAAACAACCAAAGACACTCTTACACTTACAGACTCCGCACATACCTCCAAAGTCACAGCAA	JQAP01000014.1 Xylella fastidiosa strain ATCC 35879 contig14, whole genome shotgun sequence
73	188803	188875	GGCGATCACCTTTGAGGGTTTTTTAGCGATAGTTTTCTTTATCGCTTTTTTGGTCACCTTCTTCAACACCGGT	JQAP01000001.1 Xylella fastidiosa strain ATCC 35879 contig1, whole genome shotgun sequence
73	212000	212072	TAAATCCTGAGTCACTTGCAGCGGGCGCCCGCCAGGTGAGAGTAGGTGTAGAGTGAGAGGGATACGGTTTTTT	JQAP01000002.1 Xylella fastidiosa strain ATCC 35879 contig2, whole genome shotgun sequence
73	248719	248791	TTCTGTCTGGCCAGTGCAAGCGCCACCAGGGCGCACCACGCCAGATGACCCAATTTTTCTGTCAGCGTCACTG	JQAP01000014.1 Xylella fastidiosa strain ATCC 35879 contig14, whole genome shotgun sequence
73	255104	255176	CCTACCATTGGTTATGGTCACTTACACCTATTACTCAAAATAGTAACTAAGCTATATTGAAGATGAAACAATA	JQAP01000015.1 Xylella fastidiosa strain ATCC 35879 contig15, whole genome shotgun sequence
73	283588	283660	AATTAACTTTTCCTTAATAACGGCGTATTCGGTATCTCCAAGGGCACGCGCTGCCAACTTATTCTTAACAACT	JQAP01000015.1 Xylella fastidiosa strain ATCC 35879 contig15, whole genome shotgun sequence
73	334204	334276	AATTGATGTTGAACTCGGCGCACGCTTATTCCGCCATCTATTAGCATTACCGTTAGCGTATTTTGAATCGCGC	JQAP01000014.1 Xylella fastidiosa strain ATCC 35879 contig14, whole genome shotgun sequence
73	401776	401848	TAATACTGCAATGGCGAGCTCCGGCGCTAAATCAGTCCATTACTACAGTACATATGATGGTGGTACCCAAGGA	JQAP01000004.1 Xylella fastidiosa strain ATCC 35879 contig4, whole genome shotgun sequence
73	445100	445172	TTTGCCATTAGTCCCTCCGACTACAATGCAGTGCCGCGCCGGATGGACCAACCCCATTGACTTGGCCACAGCG	JQAP01000004.1 Xylella fastidiosa strain ATCC 35879 contig4, whole genome shotgun sequence
73	478162	478234	CAATCGTATTAATCAAAAGAGCGCAGACTTTGTTGTGTGCGCTAAGGATTCTTCCGTTATAGCTGTTATTGAA	JQAP01000004.1 Xylella fastidiosa strain ATCC 35879 contig4, whole genome shotgun sequence
73	488976	489048	GGGTTCCAGCTAACCCGGTTTCTCAAGTTTCCCCATCTCACTCTAATCAACTTATAGCAATGAGCGAGCAATC	JQAP01000004.1 Xylella fastidiosa strain ATCC 35879 contig4, whole genome shotgun sequence
72	81265	81336	CGCTCGACGTTCCCATCTACCGCCCATGACCGCCACTCAGACACTGCCGCAAATCACGCCTGCAACACTAGC	JQAP01000015.1 Xylella fastidiosa strain ATCC 35879 contig15, whole genome shotgun sequence
72	97642	97713	CGGGCTAAATTGTGCTCTCGCCACTTGGTCGCAGGAATACGTAGCGCACCACGATCGAAATCAATCAACCAG	JQAP01000014.1 Xylella fastidiosa strain ATCC 35879 contig14, whole genome shotgun sequence
72	161899	161970	GCAGAATTTGAAACCTTCGGAAGTCATCGTCAATACCTATACTCATGGGGTGGTGCAGCGATTAAGGAAAAA	JQAP01000002.1 Xylella fastidiosa strain ATCC 35879 contig2, whole genome shotgun sequence
72	175018	175089	TTTGAGTGTATCGAACGAGACTGATGTCACGAATTATCCTGTCTTATCGATATGTGATCGCGAGTGTGTAGC	JQAP01000004.1 Xylella fastidiosa strain ATCC 35879 contig4, whole genome shotgun sequence
72	190318	190389	CTGCTGTTTTACTCTGTGTATTTGTATTTTCTTACCTGTGGATCGTGTCACTTTTTCTCAGGTTCTTTTGGG	JQAP01000001.1 Xylella fastidiosa strain ATCC 35879 contig1, whole genome shotgun sequence
72	271407	271478	ACATCACTCTTACGGATCGTTTCACGATAAGCTACTTGTGGCTTACCAACGTTGGCCTCGACATTAAATTCA	JQAP01000015.1 Xylella fastidiosa strain ATCC 35879 contig15, whole genome shotgun sequence
72	327512	327583	GCACGACGGGCAATCTGCATGGATTCCAAGGGTTTATCCCCAGCGTGTGCACCGTAAGCATTGATAAACATT	JQAP01000014.1 Xylella fastidiosa strain ATCC 35879 contig14, whole genome shotgun sequence
72	364803	364874	GGAAAATCGCTGCAGGAAACTCTGAGTCTGATCTTAAAGAAGATGTAACTAGTAATTTTTATCAACGCCCAG	JQAP01000004.1 Xylella fastidiosa strain ATCC 35879 contig4, whole genome shotgun sequence
72	464033	464104	TTCTTCATCGTACGGGGGTCACTCAAGAAGATCGTGCTGAAGTGCAACAACCCGTAGACGTGGATCACCATT	JQAP01000014.1 Xylella fastidiosa strain ATCC 35879 contig14, whole genome shotgun sequence
72	480880	480951	ACAATTAAGTATGTGACTGTCATTATGCGCGTCGATAATGACGGTGAGGGGGGCATCATGGCGTTGACTGCA	JQAP01000004.1 Xylella fastidiosa strain ATCC 35879 contig4, whole genome shotgun sequence
71	33121	33191	CGCGCGTCTGCCTTTTCCTGCTGCTCTTAAGCTTAGTAGTGACAATAGCAACAGCAGCAACACCAGTCTGC	JQAP01000012.1 Xylella fastidiosa strain ATCC 35879 contig12, whole genome shotgun sequence
71	91035	91105	ACTAAGATAGCTTGACCAAAAAAGTGATGATAAAGGAAACAGAAGGCAGTATTCACACCTTGACTTTTACT	JQAP01000012.1 Xylella fastidiosa strain ATCC 35879 contig12, whole genome shotgun sequence
71	159367	159437	AGTGAAATTAGGAATGCTCTCTCTCATTCATATTTCTGATCAATCACATTAGTAGTAGATATCTTCTTTAA	JQAP01000002.1 Xylella fastidiosa strain ATCC 35879 contig2, whole genome shotgun sequence
71	254233	254303	GTTCGACTTCAATGCGTTCCAATAACAATACAGCGTTATTGACAATGATGCCGGCTAACGCGAGCAGCCCG	JQAP01000001.1 Xylella fastidiosa strain ATCC 35879 contig1, whole genome shotgun sequence
71	280176	280246	CGGCCAGTACGTCACCACTAGCAACTATGTCGCCAACATTCACAAGGGGGCGCTGATTGATACATGTATTC	JQAP01000015.1 Xylella fastidiosa strain ATCC 35879 contig15, whole genome shotgun sequence
71	378993	379063	CCACATCTTTGCGCGGGTCAATACGTTGAATCAATCGATGCGCATCAGGGATGCCCGGCAATGGTAATTGG	JQAP01000014.1 Xylella fastidiosa strain ATCC 35879 contig14, whole genome shotgun sequence
71	735641	735711	ACATGCTATTGCCCCTTGCACCCGGACACGATACCGATACCGATACCGATACCGATACCGGGGCATAGCAC	JQAP01000014.1 Xylella fastidiosa strain ATCC 35879 contig14, whole genome shotgun sequence
70	36636	36705	AGACATCCACATTGCTAGCGGCGGAGAAACGGTATACGCCAATGCACCGATCAACACACCCAATACGCTC	JQAP01000014.1 Xylella fastidiosa strain ATCC 35879 contig14, whole genome shotgun sequence
70	167954	168023	ATTTTAAATACTCATATTTTTCATTACTTGCATCGTAATTATCAGTTTAAGGGCTGTGGTAAGGGTTGTG	JQAP01000002.1 Xylella fastidiosa strain ATCC 35879 contig2, whole genome shotgun sequence
70	185082	185151	TGACTTGCAAACGCTTGCTGGGCAAGCCCTTGATCCACATACCTACACATTATTCTTGCTTGGCACCTGG	JQAP01000002.1 Xylella fastidiosa strain ATCC 35879 contig2, whole genome shotgun sequence
70	189542	189611	TCTTTGCAATCCTTCATTGTGGGTATCTGAGACTCTGTGTCACAGCTTCATGAGACGATGTCATTAGAAA	JQAP01000001.1 Xylella fastidiosa strain ATCC 35879 contig1, whole genome shotgun sequence
70	254111	254180	ACCACCGAACAACATCAGTGGTACCAAACCAACAATGCAGGTCAGCTTGGTCATCACAATGGGTCGCAGA	JQAP01000001.1 Xylella fastidiosa strain ATCC 35879 contig1, whole genome shotgun sequence
70	314838	314907	GCTTTTCACCCATTCAAGCAATGGTTACCTACACCCTAATATGACCCCCTGGAATAGCGCTGTCGAAAGA	JQAP01000014.1 Xylella fastidiosa strain ATCC 35879 contig14, whole genome shotgun sequence
70	398184	398253	GTAGATTGCTGTGTTGCGACTCGTGTTTACTTTTGACTTCTCGATAACTATAAGCAGTGGTTGTTATGGT	JQAP01000004.1 Xylella fastidiosa strain ATCC 35879 contig4, whole genome shotgun sequence
70	465898	465967	TGCAGCCTCCTTAAGAGGCAAAGTCACGTTTGCACCACATCCACCCTCGGCAACAAAATGCTCCAGCGAA	JQAP01000014.1 Xylella fastidiosa strain ATCC 35879 contig14, whole genome shotgun sequence
70	709177	709246	CACGGCAACGTGAGTTTGTTAGGTGGCTACAGACGGGAAGCGATACCCTCCGTAGCGACGGCTATATAAA	JQAP01000014.1 Xylella fastidiosa strain ATCC 35879 contig14, whole genome shotgun sequence
69	29767	29835	ATCAAACAACTCAAGGTCAACATTGGAGACACCTTGTCGCAAGGCGATATCGTCGTTGTGCTTCAAAGC	JQAP01000015.1 Xylella fastidiosa strain ATCC 35879 contig15, whole genome shotgun sequence
69	37171	37239	TGATCGCTAAAACTGCAACAGATTTTTCAGATTACTTTTTCGATAAGTGGCTACTGGGCATGGGATTAC	JQAP01000002.1 Xylella fastidiosa strain ATCC 35879 contig2, whole genome shotgun sequence
69	76914	76982	AAATGCGGTAACTAGTAACAGACTACACAAATCGCGTTGCATACAGCAGATTCTTGTGTTGTAGCACTA	JQAP01000012.1 Xylella fastidiosa strain ATCC 35879 contig12, whole genome shotgun sequence
69	90525	90593	GTGTTTGATCGCGTTAGCGCGTCGATGAGGTGTTCTTGGCTGACACAGGGATGCTGCTTGCTGTGATGT	JQAP01000004.1 Xylella fastidiosa strain ATCC 35879 contig4, whole genome shotgun sequence
69	150792	150860	TTAGAGGCGGTTGGCGTGAAAAATGTTCTTGCTAAAGCTATTGGTTCTCGTAATCCGATTAATCTAGTG	JQAP01000002.1 Xylella fastidiosa strain ATCC 35879 contig2, whole genome shotgun sequence
69	180422	180490	TTCATTTGTATTTGTTCGATTTTCGACCAATGTTGGGCGTGCGTGTCGTGGTGGTGGTGTCGTATCGCT	JQAP01000002.1 Xylella fastidiosa strain ATCC 35879 contig2, whole genome shotgun sequence
69	189202	189270	GAGTTTGAATGCCCAGTTGAACCAAGCCCGCAGCAGATGAGTGCCAGCGGGAACCGACCGCATCTGGAC	JQAP01000001.1 Xylella fastidiosa strain ATCC 35879 contig1, whole genome shotgun sequence
69	285554	285622	ACTATTTGAAGCCGCAAAAAAGGCAGCCCTAACAGGTCTTATAATACCGAGTATAGCAAACCTTTTATA	JQAP01000015.1 Xylella fastidiosa strain ATCC 35879 contig15, whole genome shotgun sequence
69	373373	373441	CAATGACACAGTCCGATCAATAGCCGCATCCACTAATTCATTCACCAACACTTTGCTTTCGTCCATGAT	JQAP01000014.1 Xylella fastidiosa strain ATCC 35879 contig14, whole genome shotgun sequence
69	373560	373628	AATGCGTGCGTATTGCATTACTGTGCCAATGCGGAATGCAGTCGTGATGGGGATTTAGTGTTGATTGAT	JQAP01000004.1 Xylella fastidiosa strain ATCC 35879 contig4, whole genome shotgun sequence
69	424145	424213	AACGAAGGTCATGCTGTCTGTGACGGTCTCTGTGGTGATCCATGCGCATCACGCTCACCAGATGAAAAA	JQAP01000014.1 Xylella fastidiosa strain ATCC 35879 contig14, whole genome shotgun sequence
69	481237	481305	GTGGTTGGCGTATACAACATCATTCAGGCCCCAGAGGTACTATATGCGATTAATCCCTGGTGGGGACTG	JQAP01000004.1 Xylella fastidiosa strain ATCC 35879 contig4, whole genome shotgun sequence
69	491085	491153	TGAATTGAAAGTATCTAAAACATGATTGTAACGTCAGGTCGAGATTGCCTGTATACGCTCTTAATATCT	JQAP01000004.1 Xylella fastidiosa strain ATCC 35879 contig4, whole genome shotgun sequence
69	766997	767065	CTGCTCTCAGGCTGCGCCACAAAGCGATATGGAAGACTACAACCATTAACCAGCTACGAGAGCCGTAAC	JQAP01000014.1 Xylella fastidiosa strain ATCC 35879 contig14, whole genome shotgun sequence
68	37700	37767	GTACTGATCTTTCTGCGACAGTTGGCCCATGATGCCGAAATCCAGCACAATAAAACGTGGATTGGATT	JQAP01000012.1 Xylella fastidiosa strain ATCC 35879 contig12, whole genome shotgun sequence
68	45917	45984	TGGCCGTTCTGTTTTCATTCGGTCAACACTTCAATCTGTTTCACCAATGACGACGTTGCCTTCGGTTG	JQAP01000012.1 Xylella fastidiosa strain ATCC 35879 contig12, whole genome shotgun sequence
68	75570	75637	ATTCAGCTGCGCGGCGTGCACGGCATGCAGAACTCGCTTTACTCGCTAAAGCGGAATTACGTCCCACA	JQAP01000012.1 Xylella fastidiosa strain ATCC 35879 contig12, whole genome shotgun sequence
68	189385	189452	GTACACATTCGATCCTCTGTTTTTGGCTTGATGTTGATTCGACCTACTCTCTTCTTCATCAATCTCTA	JQAP01000001.1 Xylella fastidiosa strain ATCC 35879 contig1, whole genome shotgun sequence
68	199010	199077	ACTCCAACAGGCAGGTAGCTCGGTTTGCGTGATTAAGCGACGTACGGAGGTCAGGAAGTCCCTTCGTG	JQAP01000004.1 Xylella fastidiosa strain ATCC 35879 contig4, whole genome shotgun sequence
68	214496	214563	TGTTGCATCAGGCAGTGCGTCATATTGAGCGCGACTTGTCAGTGCGTTTTGCCGACGGTTATTGCTCA	JQAP01000004.1 Xylella fastidiosa strain ATCC 35879 contig4, whole genome shotgun sequence
68	266001	266068	TAAAGAAAAACCCCAACATGCTTTATGGAGTTAATAAGGTTTGGATCAGATTGGCATGCCGTATTTTT	JQAP01000004.1 Xylella fastidiosa strain ATCC 35879 contig4, whole genome shotgun sequence
68	339739	339806	TCGCACCGTTCATACCTCATAATTTACCCTATACTATTATGAATGCAGAAAAATAACTCGCGTTGCCG	JQAP01000015.1 Xylella fastidiosa strain ATCC 35879 contig15, whole genome shotgun sequence
68	767875	767942	TCCAGTTCGTAAACACCAAAGACCATGATGGCGATGTCACCACCGGCGCGTAATTGGGTGCTGCGGGC	JQAP01000014.1 Xylella fastidiosa strain ATCC 35879 contig14, whole genome shotgun sequence
67	24699	24765	CTGACCTTGGTGGGTCACAAATCAACCAATCATCGTTAGAGTGTCGGTCCATCACGATGACCTCGGA	JQAP01000015.1 Xylella fastidiosa strain ATCC 35879 contig15, whole genome shotgun sequence
67	93060	93126	TTCCTTTGCCGGGATTCGGGAAGGTCCGAGAACCTGAAGCCAGACAACGCGGTGAGGGTTTGTAATT	JQAP01000004.1 Xylella fastidiosa strain ATCC 35879 contig4, whole genome shotgun sequence
67	118390	118456	CCCCGAAACCCTACGCTTAGTAGAAGCTGCCGATGCGATACGTACGCGTGCTCGTGCCGACGGCATC	JQAP01000014.1 Xylella fastidiosa strain ATCC 35879 contig14, whole genome shotgun sequence
67	155453	155519	TAAGAAGTCGCTTACTGAGATTAAAGAAGTTCTTGGCCAACGTGGTTTAGGACTTGGAGTGAAGTTG	JQAP01000002.1 Xylella fastidiosa strain ATCC 35879 contig2, whole genome shotgun sequence
67	189919	189985	GCAGCGATGCATATGGTGGTCAGTAAGGACTCTGGAAAGGTCGCGTTGCAGAAATCGGCAACTTCTC	JQAP01000001.1 Xylella fastidiosa strain ATCC 35879 contig1, whole genome shotgun sequence
67	205063	205129	TTGTTTTTTCTGCTATTGAGTCCTATTTGCATTGTTACAGTTGCTGATGCCAGGAATGCGCCTGCTG	JQAP01000004.1 Xylella fastidiosa strain ATCC 35879 contig4, whole genome shotgun sequence
67	205617	205683	ATAAAACGGGCAGAGTATAGCCGCCACACCCAGAACACGGGGACAATAAAGAAAAAACGACAGGCGC	JQAP01000015.1 Xylella fastidiosa strain ATCC 35879 contig15, whole genome shotgun sequence
67	284141	284207	CGCCGATGTATGCGGCGAATTGAGTAGACCAAGTTCCTCCAAGTCAGCCAGGATGTTACGGATCGTC	JQAP01000014.1 Xylella fastidiosa strain ATCC 35879 contig14, whole genome shotgun sequence
67	407764	407830	TTCAATCAGATCCAACAGATCTGATTGCAAACGCATCATTACCGGTTGAGTTTCCGGATCCCCAAAA	JQAP01000004.1 Xylella fastidiosa strain ATCC 35879 contig4, whole genome shotgun sequence
66	82	147	CCACCAGAAGATGTTCATACTTGGTTGAGACCTTTACAAGCTGACCAACGCGGTGACAGTGTCATC	JQAP01000001.1 Xylella fastidiosa strain ATCC 35879 contig1, whole genome shotgun sequence
66	90438	90503	GATAAAAGGAAACACGTATTTGTTTAGGTGATGCCGGATCCTTTAGTGATGGCCTTTGATCTACTG	JQAP01000004.1 Xylella fastidiosa strain ATCC 35879 contig4, whole genome shotgun sequence
66	91511	91576	GGGGAATTGACAGTTTGGATCAATGTCGATGCCTGCGGCGACTGAAATGCCACCGCGAGCCAGGCC	JQAP01000004.1 Xylella fastidiosa strain ATCC 35879 contig4, whole genome shotgun sequence
66	92646	92711	ATGGATGTCCGCAAAATCCATCGCCAGCTCAGCTAAGTACATCATCCGCGGTTGGTCCATTACGTC	JQAP01000001.1 Xylella fastidiosa strain ATCC 35879 contig1, whole genome shotgun sequence
66	185738	185803	AGCTACTGCTGGTGAGGAGGAAATGCTCCGTCCTGGTTTTTCTTCCAATCTGATTAACGTAACAGC	JQAP01000001.1 Xylella fastidiosa strain ATCC 35879 contig1, whole genome shotgun sequence
66	188896	188961	CTTCTTCGCGGTGACTGTTTTCACAACTTTTTTGGCATTTTTTACTGCTGCTTTCTTGACGGCTGC	JQAP01000001.1 Xylella fastidiosa strain ATCC 35879 contig1, whole genome shotgun sequence
66	215916	215981	CAGCACAATCAACACATCAATACCCACCACCCCATACCAGTAACCCTGCTGAGTCAATGCGACAAA	JQAP01000015.1 Xylella fastidiosa strain ATCC 35879 contig15, whole genome shotgun sequence
66	245283	245348	CAAACCCTCATAAGGCAAACGCGTAGCAGAAGGTACGAAAATCGCGATACCTGCGGTTTGCTTCCG	JQAP01000014.1 Xylella fastidiosa strain ATCC 35879 contig14, whole genome shotgun sequence
66	254986	255051	ATGCAGGATACAAACACCATCGACTTAATAAGCAATGTAGCGTCACAATAACTACCACACTGTATT	JQAP01000015.1 Xylella fastidiosa strain ATCC 35879 contig15, whole genome shotgun sequence
66	307998	308063	TCATTTTGTGCGGAGGCCAGCAACGCATTAAGATCACTCAGGTTTTGTGCAGAGAGTGATGGTTTT	JQAP01000014.1 Xylella fastidiosa strain ATCC 35879 contig14, whole genome shotgun sequence
66	331434	331499	CATTGTGCTGCTACACGAAGGAATTACACATGGACACAACCTCATGATCCTAAGCCAAGTGTTGCA	JQAP01000014.1 Xylella fastidiosa strain ATCC 35879 contig14, whole genome shotgun sequence
66	448023	448088	GCTGTGGCGGCGACTAGCTTAGCGTGAAACTGTGTGGACAGAGTACTCTCTTCTACGTTGATTTTA	JQAP01000004.1 Xylella fastidiosa strain ATCC 35879 contig4, whole genome shotgun sequence
66	490589	490654	CGGTAATACTCGTTCGAGTGTATTTTTCAGCGATTCCCTCACAGGTAATACTTTGCGGTCCAAAGC	JQAP01000004.1 Xylella fastidiosa strain ATCC 35879 contig4, whole genome shotgun sequence
65	23050	23114	GCACGCGCGGCAATGTCCACAGATGTTGGCCGGGGAAGACGCGGCCACGCCGCGTCGTGGTCGCC	JQAP01000015.1 Xylella fastidiosa strain ATCC 35879 contig15, whole genome shotgun sequence
65	64156	64220	TTACGCTCAATTAGTGAAATCAAGAAGTATTTGATAATGGTTGAGGACTCGATTGTTTTTATTGA	JQAP01000001.1 Xylella fastidiosa strain ATCC 35879 contig1, whole genome shotgun sequence
65	77443	77507	GCTGCCGTTGTATCAGCGAGTGTTGGAGTTGGTGCCGGGGTTTTCTCGTGCTTTGCAAGGACGTG	JQAP01000004.1 Xylella fastidiosa strain ATCC 35879 contig4, whole genome shotgun sequence
65	78355	78419	GGGGGCACGTACTCCGGAGTTGGATGAATTAGCCAGGCGCGTTAATCTTGCTTCGCAGCGTTGAT	JQAP01000004.1 Xylella fastidiosa strain ATCC 35879 contig4, whole genome shotgun sequence
65	83155	83219	CCGGAAACATTCAGATACGCGCTTGAGCGTAATCTGGCGATCCAGAGAGCACACAGGCGATTTGG	JQAP01000012.1 Xylella fastidiosa strain ATCC 35879 contig12, whole genome shotgun sequence
65	110558	110622	TATATCAATGACAAGCTCAGCCTGGTGACTGTGGCGCGTCCCCCCATCGCCTTGCTCAATGCCGC	JQAP01000002.1 Xylella fastidiosa strain ATCC 35879 contig2, whole genome shotgun sequence
65	146994	147058	ATGATCTTTGTAATGAGGGTGATGTGGTTCTTATGACTGAAGTCGCTCCAATATCCAAAACAAAA	JQAP01000002.1 Xylella fastidiosa strain ATCC 35879 contig2, whole genome shotgun sequence
65	189476	189540	TTTTTTAGTGTCAACACTCACGCGAAAAAATATTCATCGAAAGCGTGTGCTGGGATAGCATAATC	JQAP01000001.1 Xylella fastidiosa strain ATCC 35879 contig1, whole genome shotgun sequence
65	207281	207345	GGGGATATCAATCAAATGCACACAGTCAGTGAACTGATGTAGCGGTGTCTATGTGTTGCTCATCA	JQAP01000004.1 Xylella fastidiosa strain ATCC 35879 contig4, whole genome shotgun sequence
65	252816	252880	CGAAGACCTGTTCAACCCGAATATCGTCAAACTAGTGTGCAATACACATGGAGAAGCGTTGTACT	JQAP01000014.1 Xylella fastidiosa strain ATCC 35879 contig14, whole genome shotgun sequence
65	307962	308026	GGTAAAGAGACTCTTACATCTTCCAATGTGCTTATCAGATGAAGGCCCTATTGTGGATGTCTGAC	JQAP01000004.1 Xylella fastidiosa strain ATCC 35879 contig4, whole genome shotgun sequence
64	37308	37371	GCCTTTGAGGAGGAGTTTTTGATGTTGTCCCAATGCCCTTGAACGAGCCAGTCTTTGGGAACCA	JQAP01000002.1 Xylella fastidiosa strain ATCC 35879 contig2, whole genome shotgun sequence
64	71074	71137	CTTCGCACATATCACAGCCCGATCCATCCGATGGATCGGGCTTTTGTGCCATAGGCGGGCTGTG	JQAP01000012.1 Xylella fastidiosa strain ATCC 35879 contig12, whole genome shotgun sequence
64	73830	73893	GAAGGTCGATGACCTGGATGTTTTCCATCCAGACCGTGCTGCTAAGCGCATCCTTGACATGGGG	JQAP01000001.1 Xylella fastidiosa strain ATCC 35879 contig1, whole genome shotgun sequence
64	88924	88987	TATGGCCGAGGACATTTCTCACTCCGAAGCACCAACCAGTTTACGCGAATTAGATCACAATGCC	JQAP01000012.1 Xylella fastidiosa strain ATCC 35879 contig12, whole genome shotgun sequence
64	90427	90490	GGCAGAAAATATCATCAGCCGCGGCAGTAATCCTTTTGCACCTAGCGATGAGAGTAGCAAGGAC	JQAP01000012.1 Xylella fastidiosa strain ATCC 35879 contig12, whole genome shotgun sequence
64	127889	127952	TTGGCAGTGAAATATGTGTGTTGTATGGGGTTCATGCTCATGTTCCGCTGCAACGGATACATTG	JQAP01000004.1 Xylella fastidiosa strain ATCC 35879 contig4, whole genome shotgun sequence
64	151062	151125	GCGTAAAGTAAATGATACTCCACAGGTACGGGGGTTGATTAATAAGGTTCATTACCTCGTTCGT	JQAP01000002.1 Xylella fastidiosa strain ATCC 35879 contig2, whole genome shotgun sequence
64	152341	152404	CTATGCTCGGCGTGTTGAGGGTCGTAATTCTTATATGAATAAAAGTTCTTTTTTGCCTCTCAAG	JQAP01000002.1 Xylella fastidiosa strain ATCC 35879 contig2, whole genome shotgun sequence
64	159439	159502	ATAATCGAATGGTTAAATTCTCTCTATGATATCCGTGAAATATTTCTCGGATATATTCTCATTT	JQAP01000002.1 Xylella fastidiosa strain ATCC 35879 contig2, whole genome shotgun sequence
64	184655	184718	CACACACCATTTTAAGATGGGTAATAGGCTGTTTTTCTATTGTTGTTCACAATCAACAATTGAG	JQAP01000001.1 Xylella fastidiosa strain ATCC 35879 contig1, whole genome shotgun sequence
64	249379	249442	ACGTGGCAACAAAGGAGCCGCTCTGACCACGTTCATTTCACTCGCCGGTCGCTACATGGTGTTG	JQAP01000015.1 Xylella fastidiosa strain ATCC 35879 contig15, whole genome shotgun sequence
64	252231	252294	TTACAACGGAATCCGAAACAACCCAACCACCAGTACGAAAGCAACGCTTGCCGATGCAAAATCC	JQAP01000015.1 Xylella fastidiosa strain ATCC 35879 contig15, whole genome shotgun sequence
64	329196	329259	TCCATGTATTGAGCTCACCATTAAAGTAGGTTGTACACAGCGTCAGGGCTTGACATAGAGCACC	JQAP01000015.1 Xylella fastidiosa strain ATCC 35879 contig15, whole genome shotgun sequence
64	446280	446343	TCAGCAAGTCATGCGATACTCTGTGTATAAGAATGGCAATGTTCACTTTGAAGCGTACCTATAT	JQAP01000004.1 Xylella fastidiosa strain ATCC 35879 contig4, whole genome shotgun sequence
64	483674	483737	TATGAGTAGCACTGTTACTCCACAGTTCAGTTGGATGACCCGTGTCTACTGGGAAGATACAGGT	JQAP01000004.1 Xylella fastidiosa strain ATCC 35879 contig4, whole genome shotgun sequence
63	14993	15055	ACTGACAGCAATGGATCATGCCATTCCTACCTTTTCATACTTTGCCCCTCAATCTGTCGCCCT	JQAP01000014.1 Xylella fastidiosa strain ATCC 35879 contig14, whole genome shotgun sequence
63	41393	41455	CCTGAGACCGAAGAGTACGGGATCACCAGCTTTGTTTACCGCGCGCGCCGTCCATTCCACCCA	JQAP01000012.1 Xylella fastidiosa strain ATCC 35879 contig12, whole genome shotgun sequence
63	117958	118020	CAGCTGAAGATCCTCTCCGAAAGCTGGGGAGATTTACCCACTGCAATCGACATCCAGGGACGC	JQAP01000014.1 Xylella fastidiosa strain ATCC 35879 contig14, whole genome shotgun sequence
63	176862	176924	GATTTTGCTGCGCTGGCTCGCATTAACTCACAGGATCCTGGCTCTAAAGATGCTGGTGGTGAC	JQAP01000002.1 Xylella fastidiosa strain ATCC 35879 contig2, whole genome shotgun sequence
63	195981	196043	GCGTATCAACGGTGTCATGATTTCTAATGGTCATGGCAAAGCACCTGGGTACGCTTTGATGGG	JQAP01000002.1 Xylella fastidiosa strain ATCC 35879 contig2, whole genome shotgun sequence
63	196806	196868	CGACACACTGCCATTAGTGCCCATCGTCCGTGGTGAGGGTGTGTGGTTGGTCGGTCACGATGG	JQAP01000001.1 Xylella fastidiosa strain ATCC 35879 contig1, whole genome shotgun sequence
63	198530	198592	AAATACTTGTACAAGCAAAGAAACACCACTCGAAAATTACGAGCCTTCGCTACTTGTTAACAA	JQAP01000004.1 Xylella fastidiosa strain ATCC 35879 contig4, whole genome shotgun sequence
63	254519	254581	AAAAAACCGCCTTTAGGCGGTCTGTGATTTTAAATAAAAAAGCCCCGTTGAGAGTGGACAGGA	JQAP01000014.1 Xylella fastidiosa strain ATCC 35879 contig14, whole genome shotgun sequence
63	255554	255616	GCCATTAACGAGGTTGGTAATCTTGGCAAGACGTTACGCAACGGCTGGGATGCGCAGCTTAAC	JQAP01000004.1 Xylella fastidiosa strain ATCC 35879 contig4, whole genome shotgun sequence
63	277881	277943	CAGGACGGCAACACCACACTTAACTATTTCCATTTCATAGTAAGGAAAGCGATACACCTATCA	JQAP01000014.1 Xylella fastidiosa strain ATCC 35879 contig14, whole genome shotgun sequence
63	489103	489165	TGCTTACAATGTTGCGTTTGACGCTTTAAAGAACAGTAAATACGCTGATGCCGCCGAGTTGTT	JQAP01000004.1 Xylella fastidiosa strain ATCC 35879 contig4, whole genome shotgun sequence
63	569237	569299	ACATCATCACCGGCATTAAATTGGTTATAGGCGCGCCCAAGCTTCTGAGTCAACGCAACACGA	JQAP01000014.1 Xylella fastidiosa strain ATCC 35879 contig14, whole genome shotgun sequence
62	18858	18919	CATCGTCTTTTAGTCAATGAAGCGGCTATTGTTGCGCTGCTTTCTGCTGATCCAATTATTGA	JQAP01000001.1 Xylella fastidiosa strain ATCC 35879 contig1, whole genome shotgun sequence
62	39257	39318	TAGATTGATCCTTCTGACTTCATCCACACAAGCCTTGGCAAGACAATCAACATACAAAACCG	JQAP01000014.1 Xylella fastidiosa strain ATCC 35879 contig14, whole genome shotgun sequence
62	48250	48311	CCGAAACAATCAAACCAAATCAGCCGCATAAGGTATTGCCCTCGGATAGTTGCGACAAGGCA	JQAP01000002.1 Xylella fastidiosa strain ATCC 35879 contig2, whole genome shotgun sequence
62	48388	48449	CCATGCAATCTGATGCTTCGGTGTTTCGTACGAGTAAGACCTTGCAAGAAGGGTGCGAAAAG	JQAP01000002.1 Xylella fastidiosa strain ATCC 35879 contig2, whole genome shotgun sequence
62	69963	70024	TTTAGAAAACTTGTATTTCACGGTAATTATTTTGTGCAACTAAGAATAGGTAACTTTCGCTG	JQAP01000012.1 Xylella fastidiosa strain ATCC 35879 contig12, whole genome shotgun sequence
62	76353	76414	TGAGTATGTGCGCTTTGAAAAAGAGACGATTGAGAATGTGATACGTCAAGCTAAAGACGCTA	JQAP01000012.1 Xylella fastidiosa strain ATCC 35879 contig12, whole genome shotgun sequence
62	82981	83042	GCTGTTTTTTCCAGAATGTTACTTATTTTCAGGATGGACATACCTCTCATGTCGCAGCAGAC	JQAP01000015.1 Xylella fastidiosa strain ATCC 35879 contig15, whole genome shotgun sequence
62	91606	91667	AGATCAACGCCCACAATGTTGGGGATGTTCTTGGGGCGTCGTGGATGACGGCTCATGCAGGA	JQAP01000004.1 Xylella fastidiosa strain ATCC 35879 contig4, whole genome shotgun sequence
62	92945	93006	TTCTGCCATGTTCGCAATCTTGCTGCCGGTATTGATGCGCTCAAACATGTCAAAGCGCGCCT	JQAP01000004.1 Xylella fastidiosa strain ATCC 35879 contig4, whole genome shotgun sequence
62	99181	99242	AGACGTAGGCTTTTCCATCGGCAATGAGTTTTTCTGCAGCTAGGTACAGTACTTCGAAATAA	JQAP01000004.1 Xylella fastidiosa strain ATCC 35879 contig4, whole genome shotgun sequence
62	148956	149017	GCTATTGCTCTGGTTCTGAAGAATGAAGGTTATATTTTTGATGCAAAAGTAATTCAGAGTGA	JQAP01000002.1 Xylella fastidiosa strain ATCC 35879 contig2, whole genome shotgun sequence
62	153293	153354	ATACTGCTTGTGTTGTTCCACACCTATTGGCAAGGTAAGCATCGCCTGACGTTGGTTATCTA	JQAP01000014.1 Xylella fastidiosa strain ATCC 35879 contig14, whole genome shotgun sequence
62	161883	161944	TGTACCGTGATTGTGTCGGGGGTTCATCAGGGGTCCGACGTTGTCCTCAGGATAGGAGATGG	JQAP01000004.1 Xylella fastidiosa strain ATCC 35879 contig4, whole genome shotgun sequence
62	166020	166081	TTAATGGGGAAGAAAGCAACATGCTAAATCAAATTCGGGCAAATTAAGATATCTCTTCAATT	JQAP01000015.1 Xylella fastidiosa strain ATCC 35879 contig15, whole genome shotgun sequence
62	189824	189885	TTTGTATGCTTAAGTGATGTACGCTGCATGATGCACACGGAGCATGGATTATGCAGCGGTGT	JQAP01000001.1 Xylella fastidiosa strain ATCC 35879 contig1, whole genome shotgun sequence
62	233087	233148	TCCCAGCTGTGGCGCCCAGAGCTTCAGTTTCGCATCTTTGGTGGCCTGGATATGCGCGATAG	JQAP01000014.1 Xylella fastidiosa strain ATCC 35879 contig14, whole genome shotgun sequence
62	332525	332586	CATTTAACGAAATTGTATCTGGCCTGTCCTTCCACCGAAAAAAAACCTAGCAAGACATGCAA	JQAP01000015.1 Xylella fastidiosa strain ATCC 35879 contig15, whole genome shotgun sequence
62	381993	382054	TTGCAAGTACGGCCAAGCCTGTTCCCAGCGTGCATCGTTGCGGAAGGTCGCTTCTATTTCCA	JQAP01000004.1 Xylella fastidiosa strain ATCC 35879 contig4, whole genome shotgun sequence
62	461493	461554	ATCACTCCATGGTGATGCGCAACGAATCAGTTTCACGCAGCAACACTCCTCCATCTACAACA	JQAP01000014.1 Xylella fastidiosa strain ATCC 35879 contig14, whole genome shotgun sequence
62	685227	685288	GTTCACTGCCGTTGGACATTAGTCACATTTCAAACTCAACACTATCCGTTCAATCTGCTTGC	JQAP01000014.1 Xylella fastidiosa strain ATCC 35879 contig14, whole genome shotgun sequence
61	4375	4435	TTTTATTTCATTGGTCTTTGTTATGCAATGAAAAGAAAGAACTCAAATTAATCTTTCTATA	JQAP01000001.1 Xylella fastidiosa strain ATCC 35879 contig1, whole genome shotgun sequence
61	51348	51408	TTGTGATGGGTCGACGAAGTATTTCATATCGCAGCGTGTAAAATCATGTTGGATTGGCTCT	JQAP01000001.1 Xylella fastidiosa strain ATCC 35879 contig1, whole genome shotgun sequence
61	66513	66573	AATGTGGCGGGCGTGGTATTCGGTCGCCATCTGCCGCGGACCCGCCGCAGCAGTACTATCG	JQAP01000015.1 Xylella fastidiosa strain ATCC 35879 contig15, whole genome shotgun sequence
61	68395	68455	CAGAAAATACCTACCTATATGTGCAGGTGGCATGATTAATGCCACCTGCACATAAATGCAC	JQAP01000012.1 Xylella fastidiosa strain ATCC 35879 contig12, whole genome shotgun sequence
61	89279	89339	CTGTTACATCGTTTGTTTCACAAAGAAAATCCACAACAACTAGAAAAACGTCAGCTCCGCT	JQAP01000012.1 Xylella fastidiosa strain ATCC 35879 contig12, whole genome shotgun sequence
61	149559	149619	AAAGATTTGAATCTTTCTCTTGGTTTTTCGCATCCATTGTTGTTTGTTCCCCCTGAAGGCA	JQAP01000002.1 Xylella fastidiosa strain ATCC 35879 contig2, whole genome shotgun sequence
61	155637	155697	GACTAACGAGATGATGGTGATAATCCCTATGGCCATTTTGCTATTAAATAGGAATAAAAAA	JQAP01000002.1 Xylella fastidiosa strain ATCC 35879 contig2, whole genome shotgun sequence
61	170386	170446	AAGCGCAATTTTATTAAAGTCCGATTGGTAACTTCTTCGGAATCTCAGGAGTTTCCTGAGT	JQAP01000001.1 Xylella fastidiosa strain ATCC 35879 contig1, whole genome shotgun sequence
61	183710	183770	TGTGCCAAGTACCATCCGTGCTAGCACGTTGTTGGATCTTCACATGACCGCTTGGCGTGAG	JQAP01000002.1 Xylella fastidiosa strain ATCC 35879 contig2, whole genome shotgun sequence
61	195405	195465	GCCGTCTGTGAAGTACACTGGGTGAGTTGGAAACCTGCCAATCGTTAAAATGGTTGATGTT	JQAP01000004.1 Xylella fastidiosa strain ATCC 35879 contig4, whole genome shotgun sequence
61	195546	195606	CGAAACTTTACATAATGTTGCGTTGCGTGTTGAGGATACCGAGGATCCTGACAGATTTAAG	JQAP01000002.1 Xylella fastidiosa strain ATCC 35879 contig2, whole genome shotgun sequence
61	198468	198528	GGAGATGTAAAAGGTAAAAGGCGGGCAGTCGCAGTCAGAGGGATGATGCAATAGCATTGCT	JQAP01000004.1 Xylella fastidiosa strain ATCC 35879 contig4, whole genome shotgun sequence
61	199611	199671	GCAAGGAGCCCATTGGGTTCGTGCAGGGCGTGTTCCGCCGGTGGGAATGGTGTATTTGGTG	JQAP01000004.1 Xylella fastidiosa strain ATCC 35879 contig4, whole genome shotgun sequence
61	306064	306124	ATGATTAAGTTGTTATTTTTCTGCTGTAATTTGAGGGCTAATTCGACTCATCAGCAGATCT	JQAP01000004.1 Xylella fastidiosa strain ATCC 35879 contig4, whole genome shotgun sequence
61	438871	438931	CATGTCGATGATTCAGCAGAGATATCCCTGGAAATACCCACTGATGATGCCGAGTTGGCCT	JQAP01000004.1 Xylella fastidiosa strain ATCC 35879 contig4, whole genome shotgun sequence
61	444764	444824	GTCGATGTCCACAGTGGTAATTACAGCCACGTCGGCATCGACTAAATTGACTGCATCCAGG	JQAP01000004.1 Xylella fastidiosa strain ATCC 35879 contig4, whole genome shotgun sequence
61	492111	492171	TACACATCCCAACCATCCTCAGTCGCACACATGCCACCTCAATGCAGGAACGCTTAGCAGC	JQAP01000014.1 Xylella fastidiosa strain ATCC 35879 contig14, whole genome shotgun sequence
60	1464	1523	TAAAAATTTATCCACAGATTTCCCAGGTGATCTAAGCAAAATAACTTAGGATCTTATACA	JQAP01000001.1 Xylella fastidiosa strain ATCC 35879 contig1, whole genome shotgun sequence
60	35711	35770	ACAGGATGCATGATGGACATTGATGATGGTGCATACCTCAATGCCTCGTATGCGCAAGTC	JQAP01000016.1 Xylella fastidiosa strain ATCC 35879 contig16, whole genome shotgun sequence
60	45107	45166	GATGGCTGATGAGTCGGTGTGTATTGGTCCTGCACCATCGGCGGAGAGTTATCTCAATAT	JQAP01000001.1 Xylella fastidiosa strain ATCC 35879 contig1, whole genome shotgun sequence
60	55131	55190	ACATAACTTTGTTGGACATAACGTTAGACATAACAATGAGCTGAAGGGTTAAGAACAACA	JQAP01000014.1 Xylella fastidiosa strain ATCC 35879 contig14, whole genome shotgun sequence
60	145110	145169	CCGGAGGGTCGGGTGCCAGGGGTGTGTGATGATGAGCCTGCGGTGGTTCGCCACATGCGC	JQAP01000001.1 Xylella fastidiosa strain ATCC 35879 contig1, whole genome shotgun sequence
60	184550	184609	AAAATCATCAGCTTTATCAACCGCGATGAATTGGCTCATACCAAATTCATCAGCGAAGTG	JQAP01000002.1 Xylella fastidiosa strain ATCC 35879 contig2, whole genome shotgun sequence
60	195826	195885	GGATCGACCAACCAGTAGCTCTTCCAGTGACGGCGTTCCTCCCAAGTGATTCCTGTCGAC	JQAP01000001.1 Xylella fastidiosa strain ATCC 35879 contig1, whole genome shotgun sequence
60	207571	207630	GGGCCTGTTTGTGCCGGTGCTCGCGCTGATTTGAGCGCCTTCACTCGTGGATTGAAGACC	JQAP01000004.1 Xylella fastidiosa strain ATCC 35879 contig4, whole genome shotgun sequence
60	254907	254966	AACTATCTACGTGGAAAACCTACGTAACCCGGCAATCAATGATATAGCATTTATTGTTGA	JQAP01000015.1 Xylella fastidiosa strain ATCC 35879 contig15, whole genome shotgun sequence
60	400961	401020	CCCCCCACCCCACAGATAATTCCTTAACCTGACACAAGGATCCATATCGACACAAGCGAC	JQAP01000014.1 Xylella fastidiosa strain ATCC 35879 contig14, whole genome shotgun sequence
60	610874	610933	CGCACAGCGCAAGGCGTCATGTAAAAAGTGAATCGCTTGGGGACTCTTCCGTACTTTCAA	JQAP01000014.1 Xylella fastidiosa strain ATCC 35879 contig14, whole genome shotgun sequence
59	3877	3935	CGGCCCAGGGAGGGGATGCCTTCCAGGTCAACCCCACGGTGCCGGTACAACTGATTGTT	JQAP01000004.1 Xylella fastidiosa strain ATCC 35879 contig4, whole genome shotgun sequence
59	18828	18886	ATAACGCAGTACACCCCTGCGTATCAACCGCATCTACAGGCAACCCCAAATCAAGCAAG	JQAP01000014.1 Xylella fastidiosa strain ATCC 35879 contig14, whole genome shotgun sequence
59	24846	24904	CACGTCCTTCATGCGTAGTGCGTCTCGAGCGCCCTAAGCATCATCGACATCTTCAGACA	JQAP01000015.1 Xylella fastidiosa strain ATCC 35879 contig15, whole genome shotgun sequence
59	36724	36782	GGAAAAAATGATAGATGGGCATGTATACATCCATTAGCACGGTTGAGATGAGTTAAAAA	JQAP01000002.1 Xylella fastidiosa strain ATCC 35879 contig2, whole genome shotgun sequence
59	37044	37102	CTGGCCTAATAATAAAACGTCATCAAAACAGAGGATGCCATATCCTCGCCAAAATGCCC	JQAP01000004.1 Xylella fastidiosa strain ATCC 35879 contig4, whole genome shotgun sequence
59	43612	43670	GGCCAGGTGGTAGTTCCTGGAATCAGTTTCGAAGTTAATGACGGTGAGCTGATGGTGTT	JQAP01000002.1 Xylella fastidiosa strain ATCC 35879 contig2, whole genome shotgun sequence
59	68066	68124	AGGTGCCATAGTGGCGGCTCTTTCTGGTTGGCGGCGTCGTGAGTCTTAGGTTTTTCGAT	JQAP01000004.1 Xylella fastidiosa strain ATCC 35879 contig4, whole genome shotgun sequence
59	71538	71596	AGCGATGACCTCGAATGTCCAGCTCTGTTGGGCGCAGTACAACTCCAGTACCTGCTTTT	JQAP01000014.1 Xylella fastidiosa strain ATCC 35879 contig14, whole genome shotgun sequence
59	136050	136108	GACGATGTCGACTTCGGCCCCATTATCTTGCCACTGGTGCATTTCGCCAAGCATCTTGC	JQAP01000002.1 Xylella fastidiosa strain ATCC 35879 contig2, whole genome shotgun sequence
59	145750	145808	AATGTTGAGAAAACAAGTCAGTGATATTATGGGCGTTCCCGTCCATATCAATGTCATTG	JQAP01000002.1 Xylella fastidiosa strain ATCC 35879 contig2, whole genome shotgun sequence
59	154384	154442	ATGGTTCCGCTTTTTCCTGGATTGAGGTTGATTCTGAGAAGTTCAGTGGTGTCTTTAAG	JQAP01000002.1 Xylella fastidiosa strain ATCC 35879 contig2, whole genome shotgun sequence
59	158044	158102	GCGCACTTGCTTGATAATCTGATGGCTGAGGGTCAATTCGTTACGGGCGCTCTCACCCT	JQAP01000015.1 Xylella fastidiosa strain ATCC 35879 contig15, whole genome shotgun sequence
59	172540	172598	GGTTGATTTGCATGCCATCGGTACTTATGCTCAGGTGCTGCAGTTGTTAAAGCTTCCTG	JQAP01000002.1 Xylella fastidiosa strain ATCC 35879 contig2, whole genome shotgun sequence
59	255413	255471	CATAATGAAAATGTGCGACGATCAGGTACCGACGCAAGGCAGCATGTCATTGGCAAGAC	JQAP01000015.1 Xylella fastidiosa strain ATCC 35879 contig15, whole genome shotgun sequence
59	328268	328326	CGAAGAGGTTGCCACGAATATTGATCTTGATGGGACCGAGATTCAGGCAAAAAAACGTG	JQAP01000014.1 Xylella fastidiosa strain ATCC 35879 contig14, whole genome shotgun sequence
59	337618	337676	GACGGTTGACTACCTGACTTAGCAGCCACTTGGTCGGCAGTGGCGACAACATGGCCACT	JQAP01000015.1 Xylella fastidiosa strain ATCC 35879 contig15, whole genome shotgun sequence
59	463945	464003	GAAGCATTCCACACCCCACCACAACTGTTCACGCTACACGTCGATACCATCCCCTTGCT	JQAP01000014.1 Xylella fastidiosa strain ATCC 35879 contig14, whole genome shotgun sequence
59	709403	709461	CCCTCATGAACGTATGTACCTCGCCCTCGCCTATGGAACTCTAGCAAGGCCAGAGACGA	JQAP01000014.1 Xylella fastidiosa strain ATCC 35879 contig14, whole genome shotgun sequence
58	9552	9609	ATTACTGCTTCTTCTGAACCTAAAGAAAGCTGGGAAAAGTTATTAATATCTACCTATT	JQAP01000001.1 Xylella fastidiosa strain ATCC 35879 contig1, whole genome shotgun sequence
58	16798	16855	GATATTGATCGCTTGCAGCATGGGCGAAATGACGGGTGTGACCGCATAATGACCCTCC	JQAP01000001.1 Xylella fastidiosa strain ATCC 35879 contig1, whole genome shotgun sequence
58	18947	19004	GGACGACGCGGCAGGGGCCAAATACGCCAGTCCAACCATGTAGCTAAATCACGCCTAC	JQAP01000014.1 Xylella fastidiosa strain ATCC 35879 contig14, whole genome shotgun sequence
58	23213	23270	CATTGATGCTGAGTACGATCCGGCACAACTGCCATCCGTGTTCACCTCCACCTATGGC	JQAP01000014.1 Xylella fastidiosa strain ATCC 35879 contig14, whole genome shotgun sequence
58	29224	29281	GGAAGTATCCACCCTTTACCGTCGGGCGGTAACCACTGTTACCTCCCTCAAACTCAGC	JQAP01000012.1 Xylella fastidiosa strain ATCC 35879 contig12, whole genome shotgun sequence
58	40417	40474	AGAGCTGAAAACTCAATCGAGCCAGCCCAAACAAATACTACACCGCTGCTTAGTTATC	JQAP01000012.1 Xylella fastidiosa strain ATCC 35879 contig12, whole genome shotgun sequence
58	45136	45193	TGCGTCCAGGCGTGGTAGCCCCAATCGTAAATCTGCCGCGCGCCATTGCGCTTCGAAT	JQAP01000002.1 Xylella fastidiosa strain ATCC 35879 contig2, whole genome shotgun sequence
58	48503	48560	TGTTTGGAATTCGGATTTGATAGAAACCTACGAGCTCCACAATTTGCTGTTAAACGCA	JQAP01000002.1 Xylella fastidiosa strain ATCC 35879 contig2, whole genome shotgun sequence
58	67290	67347	AACCACAGCAACAATGCGATCAAGCGGTTGATGTTGTTGCTGTCGTGCTGACGCCACC	JQAP01000015.1 Xylella fastidiosa strain ATCC 35879 contig15, whole genome shotgun sequence
58	117975	118032	GATTCTGAGTGTGGTAACGCTGCTGCCGGTGGCGACTGGGATGAGCGGGGTATTTTAT	JQAP01000004.1 Xylella fastidiosa strain ATCC 35879 contig4, whole genome shotgun sequence
58	125905	125962	GGTACGAGATTGATCCTATCACCGGCCCCACCCAAAATGGAGGCAATCAAATACCCTC	JQAP01000014.1 Xylella fastidiosa strain ATCC 35879 contig14, whole genome shotgun sequence
58	146086	146143	TATCTTCGGCTGTGATCGGGTGAGCGCCACGATACAGAGCGTCGGAAGCGGCTTGGTT	JQAP01000001.1 Xylella fastidiosa strain ATCC 35879 contig1, whole genome shotgun sequence
58	165491	165548	CGCATGGCCAACCAAGTGAGCGCAAGAGTGACGGATAATCTCCAGGGCTTCTTGATCC	JQAP01000015.1 Xylella fastidiosa strain ATCC 35879 contig15, whole genome shotgun sequence
58	188977	189034	TGCCGCCTTCTTCACGGCCACTGCTTTCTTCACGACAGCTGTCTTCTTTACGATTGCT	JQAP01000001.1 Xylella fastidiosa strain ATCC 35879 contig1, whole genome shotgun sequence
58	275337	275394	CTGAAATTGTTAGAAGATTAGATATTTCTCCCCGACGGATTTTCCCTTGATCTGGCTC	JQAP01000001.1 Xylella fastidiosa strain ATCC 35879 contig1, whole genome shotgun sequence
58	291571	291628	CAGCGGCGAAGCATAAACGTTATCTACCGGCACATCAAAAAAACCCTGGATTTGATCA	JQAP01000015.1 Xylella fastidiosa strain ATCC 35879 contig15, whole genome shotgun sequence
58	334930	334987	CCAAGGGCGCATCACCTTCGAGCGCCTCATCTTCCGTTACCGTCCAGATACCCCCGAC	JQAP01000014.1 Xylella fastidiosa strain ATCC 35879 contig14, whole genome shotgun sequence
58	342137	342194	TTCACGTTTAGGCCCGCATCTAAAGACGCGGGCCTTCATTTTTACTTCCAAAACTCAC	JQAP01000015.1 Xylella fastidiosa strain ATCC 35879 contig15, whole genome shotgun sequence
58	419941	419998	GCCGCGCCATGCAGTGTCGTGATTAAGTAAGTGTGTAGTGAGGCTCAAGAGGTAGGGG	JQAP01000004.1 Xylella fastidiosa strain ATCC 35879 contig4, whole genome shotgun sequence
58	492015	492072	GGGATCCCACGTGCGTTTCTACTGACAGCAAACTTCCACTTCTAAGCGACACGAGCAC	JQAP01000014.1 Xylella fastidiosa strain ATCC 35879 contig14, whole genome shotgun sequence
58	545390	545447	ACGCAAGTATCACCCGTCGATTCCGCCACACATTGATCAATCCAAAATCCCAAAGGGA	JQAP01000014.1 Xylella fastidiosa strain ATCC 35879 contig14, whole genome shotgun sequence
58	685015	685072	CACGATGATCGGAACGATGAAAAAATGTTCGATATCGGTCACCTCTATCATCACAAAC	JQAP01000014.1 Xylella fastidiosa strain ATCC 35879 contig14, whole genome shotgun sequence
57	66819	66875	CGCAATCTGTTCGGAGGTTGCCCCGTCAGGCAAGGAAACCAAGATGTGCTGTAGATG	JQAP01000015.1 Xylella fastidiosa strain ATCC 35879 contig15, whole genome shotgun sequence
57	161346	161402	AAAATATCCGATCATTTTCGAACCTGGTTTCGGGGGAGTCGATAAGCTATTTGTTTT	JQAP01000002.1 Xylella fastidiosa strain ATCC 35879 contig2, whole genome shotgun sequence
57	165471	165527	TTTGAAACTTTGTCTCGATCTATTCTTTGGAATGCCGGGTAGTTAATTTCTAGTATA	JQAP01000002.1 Xylella fastidiosa strain ATCC 35879 contig2, whole genome shotgun sequence
57	226950	227006	GGAAGTGTTCTTTCTATTCTTGGGATCTGTTTGAGTCGTTTGATTCTGTCTTGAATC	JQAP01000004.1 Xylella fastidiosa strain ATCC 35879 contig4, whole genome shotgun sequence
57	230861	230917	TGCTTCCTTGGCCAATTTGGCGGCCAGCTCAGGAGTCAGAGTCAACAACGCACGGGC	JQAP01000014.1 Xylella fastidiosa strain ATCC 35879 contig14, whole genome shotgun sequence
57	266329	266385	CTGCCAGTCGATTTCTAACAGTACATCGTGACCGGCAGCCAGTTGTGGCTCCACCGA	JQAP01000004.1 Xylella fastidiosa strain ATCC 35879 contig4, whole genome shotgun sequence
57	293459	293515	TTCAGACGCGCTCCAGCTTGGTTCAAGTTATCCTTAAGGTGCTCGGTGTTGGTAGGG	JQAP01000001.1 Xylella fastidiosa strain ATCC 35879 contig1, whole genome shotgun sequence
57	492196	492252	GACCGTCGGTCCCCAAGGGGCTCAGGTTAAACATAATCTACAGCTACCGGAAACATC	JQAP01000014.1 Xylella fastidiosa strain ATCC 35879 contig14, whole genome shotgun sequence
56	35824	35879	GGCAAACCTGATGCGCCATCGTGTAGGTATACCATTCCACAGCGAAACCTAGCTTA	JQAP01000014.1 Xylella fastidiosa strain ATCC 35879 contig14, whole genome shotgun sequence
56	71141	71196	GTTCATGATCCGCCGCTTAAAGCTAGAGTGACCAGATCTTATAAAGAACAGTTTGC	JQAP01000012.1 Xylella fastidiosa strain ATCC 35879 contig12, whole genome shotgun sequence
56	122652	122707	TTGGGCATTGTTTCTATCAGCGCTCTTGAAATACAGTTTCGTAGGCTGACTTGATG	JQAP01000001.1 Xylella fastidiosa strain ATCC 35879 contig1, whole genome shotgun sequence
56	244914	244969	TATCGGTGTTGTTCATGTGTCCTTTGATCCCGCGCCTTTTTGGACTTGCAGCAATC	JQAP01000004.1 Xylella fastidiosa strain ATCC 35879 contig4, whole genome shotgun sequence
56	296883	296938	AGAATGACATCCAACGGGATTAGTCACCCTTATGTTGGTAAACCAGTATTAGCAGC	JQAP01000001.1 Xylella fastidiosa strain ATCC 35879 contig1, whole genome shotgun sequence
56	316502	316557	ACGCTATAGGACACGGATGTGAGTAAAAAGCACAAAAAGGCATCGTTCTGGAGTCC	JQAP01000004.1 Xylella fastidiosa strain ATCC 35879 contig4, whole genome shotgun sequence
56	332463	332518	TACTACCACAATGCATCCCAGGCAGCATCAATACGAGTTTCACTATCATCTTGCCG	JQAP01000015.1 Xylella fastidiosa strain ATCC 35879 contig15, whole genome shotgun sequence
56	333155	333210	TTATATCCCTTTATCATTTACTCAGCAGCGCCTGACGTTTTACTAGATGAACATTA	JQAP01000014.1 Xylella fastidiosa strain ATCC 35879 contig14, whole genome shotgun sequence
56	339304	339359	AGCCATTGATCAATCGCACGGACCCCAGCTTACCGTAATGTAACAATCTGTCTAAC	JQAP01000015.1 Xylella fastidiosa strain ATCC 35879 contig15, whole genome shotgun sequence
56	364691	364746	TTTCAACGTGCAACCATTTGGTCAGGTAACAATTGGGCGACAAAAACAGATCTTGG	JQAP01000004.1 Xylella fastidiosa strain ATCC 35879 contig4, whole genome shotgun sequence
56	374946	375001	TTTGTCAGTGCCTTTGGCGACATTGAGAAACGGCAATATGACAGCAGTACCACCCT	JQAP01000014.1 Xylella fastidiosa strain ATCC 35879 contig14, whole genome shotgun sequence
56	490234	490289	TACCTACCACAACTGCTTAGTCAAAGTTTTTATTGCAGTCTAGCGTTTCGGTAGTA	JQAP01000004.1 Xylella fastidiosa strain ATCC 35879 contig4, whole genome shotgun sequence
56	615919	615974	AACCGCTTGCTGACTGAAGGAACTTCAAGATTCGCTGATCGGATGCGATGTCACAT	JQAP01000014.1 Xylella fastidiosa strain ATCC 35879 contig14, whole genome shotgun sequence
56	736755	736810	GGATGCTCACTTGTACCGCGGCGCCACTTTTTTACCGTCCAGGACACGACAAGCGC	JQAP01000014.1 Xylella fastidiosa strain ATCC 35879 contig14, whole genome shotgun sequence
55	19518	19572	ACGCAAAGTGTGGATCGTGCAGAAGCGTCCCCAGCTCCTCTGCACTACACAGCTC	JQAP01000014.1 Xylella fastidiosa strain ATCC 35879 contig14, whole genome shotgun sequence
55	31911	31965	CATGAGCATCAGGCACCGCTTACACTGGCAAGCTATTAAGAATTCAAGACAAGGG	JQAP01000014.1 Xylella fastidiosa strain ATCC 35879 contig14, whole genome shotgun sequence
55	58040	58094	TTTTGGGGGCAGGCGGTGGCACCGTCTCCATCTGTAGGAGGCTGTGTGGTGGTTT	JQAP01000016.1 Xylella fastidiosa strain ATCC 35879 contig16, whole genome shotgun sequence
55	58642	58696	GAGGAAGGTTGTTGAGTTTTCATAATGGACTTAAATTGAAGCTGTTTCCCCGCTG	JQAP01000001.1 Xylella fastidiosa strain ATCC 35879 contig1, whole genome shotgun sequence
55	62823	62877	TTAAGTGAGTCATTACTCTGGTTACTTATCGATAATTTCGCTGATGACTTGTTCA	JQAP01000001.1 Xylella fastidiosa strain ATCC 35879 contig1, whole genome shotgun sequence
55	90526	90580	CTAGTAAAGATTCAATAAGGGAATAACATAAAATAAAATTGACTTAAATAATCTG	JQAP01000012.1 Xylella fastidiosa strain ATCC 35879 contig12, whole genome shotgun sequence
55	170531	170585	TTGCAAACTTGCTGGCTTACATACGAAATGATTGATACGATTGGAGTCCGTCATT	JQAP01000001.1 Xylella fastidiosa strain ATCC 35879 contig1, whole genome shotgun sequence
55	214688	214742	TCCACGGCCACCACCGCCAATGTGAATTGCCTCCCCGAGCCAGCGGGTCCCGGAA	JQAP01000002.1 Xylella fastidiosa strain ATCC 35879 contig2, whole genome shotgun sequence
55	244244	244298	CCCACTGTCTACTGACAATATTCATCAAAACGATGGCTAAGCCATCAGCCAGAAA	JQAP01000014.1 Xylella fastidiosa strain ATCC 35879 contig14, whole genome shotgun sequence
55	254630	254684	ACTTGTGAATGATCGCCAGCATCTAGTCGCAGCGATAACACCTGGCGATGGAACA	JQAP01000015.1 Xylella fastidiosa strain ATCC 35879 contig15, whole genome shotgun sequence
55	255176	255230	ATGATCCGCGTCAACGATTCCCTGAAGTTGGTTTCAGCCTACCGTGTCGATCGTA	JQAP01000004.1 Xylella fastidiosa strain ATCC 35879 contig4, whole genome shotgun sequence
55	287429	287483	CTCGCAGCAATGAACGCGATCTGGCCAAGCAATTAGCACTTCAACTCTCACCACT	JQAP01000014.1 Xylella fastidiosa strain ATCC 35879 contig14, whole genome shotgun sequence
55	292322	292376	CGGCAGCCGCTCCAAAGCACACTCAGCCTCATCGCGCGTACTGAATTCCACAAAG	JQAP01000015.1 Xylella fastidiosa strain ATCC 35879 contig15, whole genome shotgun sequence
55	473943	473997	TGTATCTCTTACGGCATTTTTGCTATCGGATTTTTTTAATTTCATTCATGTCATG	JQAP01000004.1 Xylella fastidiosa strain ATCC 35879 contig4, whole genome shotgun sequence
55	479870	479924	TGCTCATGTGAGTGCTACTGCTCAGCGCTTAGGCGTCAGTACGAAGCAGGCGTGG	JQAP01000004.1 Xylella fastidiosa strain ATCC 35879 contig4, whole genome shotgun sequence
55	502709	502763	GAACCGACACAATACGATCGGCATTGATTTAGTAGCGATGTGCGTTAACGACGTC	JQAP01000014.1 Xylella fastidiosa strain ATCC 35879 contig14, whole genome shotgun sequence
55	609408	609462	GCCGGCGGCGGTCAGCCAGCTTCGCAGGATCTCCAAGGTCTGTGTGTCAAAGCCA	JQAP01000014.1 Xylella fastidiosa strain ATCC 35879 contig14, whole genome shotgun sequence
54	35012	35065	AGATCCGCAACAGCGGTCTTAATGTTGTATCGGGTCAGAGCCCTGCTTACCTTC	JQAP01000002.1 Xylella fastidiosa strain ATCC 35879 contig2, whole genome shotgun sequence
54	60039	60092	CTTTGGGTTGGATGACTGTGTTTTTGTGTGTGGCAGGTGTTTTTGTTGAGTTAT	JQAP01000001.1 Xylella fastidiosa strain ATCC 35879 contig1, whole genome shotgun sequence
54	62742	62795	AAATATTATCAATTGCTACATTTGATGATGCGTTATTTATCTTGGATAAATAAG	JQAP01000001.1 Xylella fastidiosa strain ATCC 35879 contig1, whole genome shotgun sequence
54	80998	81051	TTTGGGATTTTGGATTGATCAATGTGTGGCGGAATCGACGGGTGATACTTGCGT	JQAP01000012.1 Xylella fastidiosa strain ATCC 35879 contig12, whole genome shotgun sequence
54	128668	128721	TCAGCATGGGAGTCGCGTCTCTGAAATGGCGGACATCCCAGGAATGACCCATCC	JQAP01000001.1 Xylella fastidiosa strain ATCC 35879 contig1, whole genome shotgun sequence
54	228239	228292	CCCCCCATCGGCAGTAATTATGACTCTGTTCATGGGATGATCTGGATTTGGTAT	JQAP01000015.1 Xylella fastidiosa strain ATCC 35879 contig15, whole genome shotgun sequence
54	255749	255802	GTTGGAGCGGAGTGGCAGGTGCTACCCAAGCTCAAGCTCAGTGCTTGGGGGAAT	JQAP01000004.1 Xylella fastidiosa strain ATCC 35879 contig4, whole genome shotgun sequence
54	274254	274307	AGTGGTAACTTCGCGAAGTAATCTGTGGAGATGGGTAGCTGGATTATCTTATCA	JQAP01000001.1 Xylella fastidiosa strain ATCC 35879 contig1, whole genome shotgun sequence
54	349134	349187	CGCAGTTGCGGGGCCTGTTGTATGGCGCGATGGCGATGCCAGGAGATCAATGTG	JQAP01000014.1 Xylella fastidiosa strain ATCC 35879 contig14, whole genome shotgun sequence
54	373773	373826	CCATATGAGGCTGGTCATTTGTCTGCGGTGCAGACATTGACTGAGGGGTTGCTG	JQAP01000004.1 Xylella fastidiosa strain ATCC 35879 contig4, whole genome shotgun sequence
54	444852	444905	GCCAAATCAAGCACGGCGCGCGAAAATAACCAGAAAGCAGCCAAAGTGCCAAAC	JQAP01000004.1 Xylella fastidiosa strain ATCC 35879 contig4, whole genome shotgun sequence
54	576971	577024	GACACCGGAGGCGCATTGCCCACCCCTCCCTGGATGGTAGTAGCCGGTAGACGT	JQAP01000014.1 Xylella fastidiosa strain ATCC 35879 contig14, whole genome shotgun sequence
54	747429	747482	TTTTATACAAACCCAACCCACACTACACGCTGCCATAAAGCAATGCCCCATCGG	JQAP01000014.1 Xylella fastidiosa strain ATCC 35879 contig14, whole genome shotgun sequence
53	9243	9295	CCAACACGTATATAACGATAATGTGTGACGCTCAACGCATAAAGTAAGTGATC	JQAP01000008.1 Xylella fastidiosa strain ATCC 35879 contig8, whole genome shotgun sequence
53	34772	34824	TAAGTTTCCTACTTTTGTTCGTCGATGCAGTCGGTGCATGCATTTATCAAATG	JQAP01000002.1 Xylella fastidiosa strain ATCC 35879 contig2, whole genome shotgun sequence
53	35538	35590	CGATAGGTGTTTCATCATCGTAGCGCTCGCGTATCGCCCCAGTGCGGTGCTCT	JQAP01000016.1 Xylella fastidiosa strain ATCC 35879 contig16, whole genome shotgun sequence
53	64530	64582	TTTAAAATAAAATATAAATATTTTTAATAAATTTTCTTGGCTATCTTCTAAGT	JQAP01000001.1 Xylella fastidiosa strain ATCC 35879 contig1, whole genome shotgun sequence
53	149909	149961	CGTCGCGCTAAATCGACCCGTCTTCATATACGTAAGTTGGGTGTACCTCGCCT	JQAP01000002.1 Xylella fastidiosa strain ATCC 35879 contig2, whole genome shotgun sequence
53	158904	158956	GCAGTGCTGAGGACTCATCTGTGATACCAATTTTAGATGCTGAAAAATTATGA	JQAP01000004.1 Xylella fastidiosa strain ATCC 35879 contig4, whole genome shotgun sequence
53	178412	178464	GTTCAAAGCGATGAATGTTTTCTACTTAGGTATTTTGGGATAATTATTGGAAA	JQAP01000002.1 Xylella fastidiosa strain ATCC 35879 contig2, whole genome shotgun sequence
53	248823	248875	TGCATTATCCCGCCGATATTATTGCGCAGTGTGTCCGCTGGTACCTGGCTTAT	JQAP01000014.1 Xylella fastidiosa strain ATCC 35879 contig14, whole genome shotgun sequence
53	291510	291562	CATCCGGGGAAACCACAATTATATTGTCAGTGCCATAAGCACGCCAAATATCA	JQAP01000015.1 Xylella fastidiosa strain ATCC 35879 contig15, whole genome shotgun sequence
53	293810	293862	CAGACTCAAGCGTTTCCAACGCACGCACATCCACTGCAAGATCAACGTGCGTA	JQAP01000014.1 Xylella fastidiosa strain ATCC 35879 contig14, whole genome shotgun sequence
53	341945	341997	TTACTCCACCTTTTCCATCTTTCTGTTTAGAATAAATTAATAAGATACCAATT	JQAP01000015.1 Xylella fastidiosa strain ATCC 35879 contig15, whole genome shotgun sequence
53	349558	349610	GAAAGCGGCTGTGTGGACCGCGACATTGTCGCGGCCTGTTTCAATAAAGAAGC	JQAP01000014.1 Xylella fastidiosa strain ATCC 35879 contig14, whole genome shotgun sequence
53	374457	374509	GTAAGAGAAAGCAGGCTTGGGATCATCAGTGAACTTGAGCGACTGGTGGCCCT	JQAP01000014.1 Xylella fastidiosa strain ATCC 35879 contig14, whole genome shotgun sequence
53	396849	396901	GAAACAGATAACGCCAAATCAGCGCGACAGCTACCAGCGTCGTCACCACCGGA	JQAP01000014.1 Xylella fastidiosa strain ATCC 35879 contig14, whole genome shotgun sequence
53	449220	449272	TTCTCTACACAAAATTTAACGGCGAGCAGTTTTTACTAGAATAAAATTCATAT	JQAP01000004.1 Xylella fastidiosa strain ATCC 35879 contig4, whole genome shotgun sequence
53	615366	615418	CTAACGAGTATGGTAGTGGTGTAGTCGTGTTTCACATAGCTACCGATCAAGCT	JQAP01000014.1 Xylella fastidiosa strain ATCC 35879 contig14, whole genome shotgun sequence
52	35953	36004	ACTGTTGCGCATTGCTGCCTGAAAGCAACCCTGTAGTGGTAGTGACAACGTT	JQAP01000014.1 Xylella fastidiosa strain ATCC 35879 contig14, whole genome shotgun sequence
52	73001	73052	AATATGTCCATTACGACACACAACAACCAATGGGGATTGTTTAGCACTCAGT	JQAP01000012.1 Xylella fastidiosa strain ATCC 35879 contig12, whole genome shotgun sequence
52	82114	82165	CTACAACAACGTTGAATTAGGGGCCGATCACTCCTGCGGAAGGCTCGCCGTG	JQAP01000012.1 Xylella fastidiosa strain ATCC 35879 contig12, whole genome shotgun sequence
52	168730	168781	GTGTCCGCCGTTGATGTGTATTGTGGCGGGAGGGGGAGTGCTAATGTTGCTA	JQAP01000001.1 Xylella fastidiosa strain ATCC 35879 contig1, whole genome shotgun sequence
52	195246	195297	TCGCATGGGTAATAAACATAATGGTAAAGTTCTCCAGGTACTCGGTTTCCTT	JQAP01000002.1 Xylella fastidiosa strain ATCC 35879 contig2, whole genome shotgun sequence
52	211678	211729	CGGGCGCTGATACATATCTTTATTGGCTGATGCTCAGCTAAGTATGTTCCGT	JQAP01000002.1 Xylella fastidiosa strain ATCC 35879 contig2, whole genome shotgun sequence
52	264155	264206	GGAGCCAGCCGATGTCGATCTTGCGGCTGCAATGTGCTTGCCGGTGCAATGG	JQAP01000004.1 Xylella fastidiosa strain ATCC 35879 contig4, whole genome shotgun sequence
52	268709	268760	ATGACACCTTCAAACAAACATACCAATCAGTGTTTTTCTGTCTCACATCGAC	JQAP01000014.1 Xylella fastidiosa strain ATCC 35879 contig14, whole genome shotgun sequence
52	271148	271199	GAAAACCAGCTTAACTTTCACACCGACGACAGGGAAACCAGCCAACGGACCA	JQAP01000015.1 Xylella fastidiosa strain ATCC 35879 contig15, whole genome shotgun sequence
52	298290	298341	CAGAGAAACACCCCAACAACTCCCTGCAAACACCCCACTACCGCCACAACAG	JQAP01000015.1 Xylella fastidiosa strain ATCC 35879 contig15, whole genome shotgun sequence
52	374606	374657	CAGGGAGCTGTTGCGTCAGCAGCGACTTCATTATCACGACGTAGCAAACAAC	JQAP01000014.1 Xylella fastidiosa strain ATCC 35879 contig14, whole genome shotgun sequence
52	394407	394458	AGGCTCAATACTGAAACCGGACTTAGTCGCCTCAATTGCACCATCTGTATTG	JQAP01000014.1 Xylella fastidiosa strain ATCC 35879 contig14, whole genome shotgun sequence
52	414816	414867	TCCTAACTCACACTGCGTCCCCCTTCTGGGGCATCACACATCAGGCACTATC	JQAP01000014.1 Xylella fastidiosa strain ATCC 35879 contig14, whole genome shotgun sequence
52	682257	682308	CTTCATGACTCCGGATCACCCTATGAATGTATTGCGTAATCGACCCGGAAGA	JQAP01000014.1 Xylella fastidiosa strain ATCC 35879 contig14, whole genome shotgun sequence
51	1359	1409	CCCCCCATTATATGACTACTCATTTTCTATAGAAATGTAGAAATAAATTAG	JQAP01000001.1 Xylella fastidiosa strain ATCC 35879 contig1, whole genome shotgun sequence
51	5411	5461	GGGAGTACGTACATCCGTCGGCCCCCTTATTGGGAAGGGGTCTTAGCCGGT	JQAP01000004.1 Xylella fastidiosa strain ATCC 35879 contig4, whole genome shotgun sequence
51	16901	16951	CTTTTCTTTCACTTCAGATTGCTATGAGCCATTTCGACCGCGTCCGCGATT	JQAP01000001.1 Xylella fastidiosa strain ATCC 35879 contig1, whole genome shotgun sequence
51	30980	31030	ATGGAAGATACAAGACCATCCATAGATGCAGATACCAACTGTTGTTGCATC	JQAP01000014.1 Xylella fastidiosa strain ATCC 35879 contig14, whole genome shotgun sequence
51	53393	53443	CTGCTGAACAACGTAGCGTGGAAGTGTCGTTATTGAGGTGGGTATTGTTCA	JQAP01000004.1 Xylella fastidiosa strain ATCC 35879 contig4, whole genome shotgun sequence
51	65006	65056	ATGTGCAAGATTTTACAGATATCGTATTCCATTGGTAAGTTGGACTATATG	JQAP01000001.1 Xylella fastidiosa strain ATCC 35879 contig1, whole genome shotgun sequence
51	81317	81367	TTTTACTGGCGCATTCATCTCGGAGGTAGGCTGTGAATTATTTTGACGCTA	JQAP01000012.1 Xylella fastidiosa strain ATCC 35879 contig12, whole genome shotgun sequence
51	87717	87767	GCGCCAACCACGCTACGGTGCTGCGTAACTGTTGTATAGCGACCAAGGGCC	JQAP01000012.1 Xylella fastidiosa strain ATCC 35879 contig12, whole genome shotgun sequence
51	142492	142542	TCATCGTATGTGTATGTCAGTCTCTCTATGGGAAAGGCATCTTTGTTGGTT	JQAP01000001.1 Xylella fastidiosa strain ATCC 35879 contig1, whole genome shotgun sequence
51	244335	244385	CGCAATGTGACCGACAAAGATGCAGCGCTGCGCGAGATGTTCCGTGTGCTG	JQAP01000004.1 Xylella fastidiosa strain ATCC 35879 contig4, whole genome shotgun sequence
51	264046	264096	GCACAATTAATGAGACTAATTCAAATAACAAATAGGTTTTATCCCCTTCTT	JQAP01000014.1 Xylella fastidiosa strain ATCC 35879 contig14, whole genome shotgun sequence
51	265547	265597	TCCATAGCTTCACGCTCAGCCCGCTCGCGTTCGGCCTTCTCGATCTCGTCG	JQAP01000004.1 Xylella fastidiosa strain ATCC 35879 contig4, whole genome shotgun sequence
51	284540	284590	GTGGTCTCCGGCGAGACAGGTGCCGGCAAGTCACTGATCATTGACGCTCTG	JQAP01000014.1 Xylella fastidiosa strain ATCC 35879 contig14, whole genome shotgun sequence
51	439301	439351	AATCTGGTCATCGCATTCAAGATGGGCGTATTTATGTGCTTCGGGATAATC	JQAP01000004.1 Xylella fastidiosa strain ATCC 35879 contig4, whole genome shotgun sequence
51	491637	491687	GTCGGCAAAATCACCAATGCCTGGTCAATATCGGCAGGGTTCACTACGATG	JQAP01000014.1 Xylella fastidiosa strain ATCC 35879 contig14, whole genome shotgun sequence
51	494826	494876	CTACCACAGTGACCCCTTCGCTATGACAGCCCCATCGCTTCTATAACAACC	JQAP01000014.1 Xylella fastidiosa strain ATCC 35879 contig14, whole genome shotgun sequence
51	496097	496147	GCTGCTACAACACCAAGCAACCCATTAGGCAACATTTTGGTATGCAAACAC	JQAP01000014.1 Xylella fastidiosa strain ATCC 35879 contig14, whole genome shotgun sequence
51	616177	616227	CTCACCGAGGCTCTTGCCGACGGTGTTGATCTGTTTTTCTGCTTTTTCAAG	JQAP01000014.1 Xylella fastidiosa strain ATCC 35879 contig14, whole genome shotgun sequence
50	38349	38398	ATCTCAACACATCACAATGACGATCAGCCCACCAAGCATGATCTGATGTT	JQAP01000004.1 Xylella fastidiosa strain ATCC 35879 contig4, whole genome shotgun sequence
50	60430	60479	AAAAAAATGGGTATGGTGATCAGTGAGACATGGTGTGCTGACCGATATCC	JQAP01000001.1 Xylella fastidiosa strain ATCC 35879 contig1, whole genome shotgun sequence
50	88744	88793	AAAAAACCACTATCCTGCATTTGTAAGCAGGCTACTTGGTGAAGCTGTAG	JQAP01000012.1 Xylella fastidiosa strain ATCC 35879 contig12, whole genome shotgun sequence
50	92667	92716	ATCACCTCCTCAAATTGCTTACGGTAACGCTCGGTCAACGTCTCATCTTG	JQAP01000004.1 Xylella fastidiosa strain ATCC 35879 contig4, whole genome shotgun sequence
50	109889	109938	TAACCATGATCTATGGCTGGCCCGACTGTCCGTGGCCCCCGTCGGGAGCG	JQAP01000014.1 Xylella fastidiosa strain ATCC 35879 contig14, whole genome shotgun sequence
50	149792	149841	ATGTGCAAATGTCTATTAATCGCTGACCCTTCTGTTTGGTAGTTGGATTT	JQAP01000002.1 Xylella fastidiosa strain ATCC 35879 contig2, whole genome shotgun sequence
50	169501	169550	AATGCAATCACTTATCACCTGTTCCAATTCCCCCTCTTCTTATGCAACAT	JQAP01000015.1 Xylella fastidiosa strain ATCC 35879 contig15, whole genome shotgun sequence
50	188050	188099	GCGAAAGATCACGAAATCAAAGGTATGTCCGTTTGGGTGGAAATTGAAAA	JQAP01000001.1 Xylella fastidiosa strain ATCC 35879 contig1, whole genome shotgun sequence
50	197602	197651	CTTGGCATCATGCCGGACTTGTTGTGTCTTTCCAAGGGGCTGACGGGGGG	JQAP01000001.1 Xylella fastidiosa strain ATCC 35879 contig1, whole genome shotgun sequence
50	271327	271376	GTGACTGCACAAGGCGTGAATGTAGCCCAGCTGCCAGCGGTACCTCAGTG	JQAP01000004.1 Xylella fastidiosa strain ATCC 35879 contig4, whole genome shotgun sequence
50	309956	310005	TAGAAGTGTGCTAAGGCGTTGTGCATGACTCACAAGGAGAAAAACAACCC	JQAP01000004.1 Xylella fastidiosa strain ATCC 35879 contig4, whole genome shotgun sequence
50	364752	364801	TAAGAAACGATAATTCTGGTGGTTCTTCTGTTAGTTCACTCTCTTCTGAT	JQAP01000004.1 Xylella fastidiosa strain ATCC 35879 contig4, whole genome shotgun sequence
50	365235	365284	TTAAAAGTGATAATGCAGGATCATCCGGAATTGAGGCGCTCTCCGCTGAT	JQAP01000004.1 Xylella fastidiosa strain ATCC 35879 contig4, whole genome shotgun sequence
50	439396	439445	TCAGAAAATTCAACGGCCCTCCTGGTAGAAAAATTATCCCCTACGAATAG	JQAP01000004.1 Xylella fastidiosa strain ATCC 35879 contig4, whole genome shotgun sequence
50	472548	472597	CGGCGTCTCTGTCGCCAAAGAGATTGAGTTGGCCGACAAGTTTGAAAACA	JQAP01000014.1 Xylella fastidiosa strain ATCC 35879 contig14, whole genome shotgun sequence
49	7783	7831	TTGGGGTGCTGTTAGGTGTTTGTGTGCATGTCGTGTGTTCGCCGCTATC	JQAP01000004.1 Xylella fastidiosa strain ATCC 35879 contig4, whole genome shotgun sequence
49	54422	54470	GTCAAAATGTCGAGCCCCTTGGGCGTGTTATTAGGTTGATACGCTGTGG	JQAP01000004.1 Xylella fastidiosa strain ATCC 35879 contig4, whole genome shotgun sequence
49	80701	80749	AGACACACGCAATCACTCCTTCTTAATTCACATCCCAGCCATGCCCTAC	JQAP01000015.1 Xylella fastidiosa strain ATCC 35879 contig15, whole genome shotgun sequence
49	90388	90436	GCTGAGTGCGCCTCGTCAAGACGCTGATGTGGATACGCCAACATGATAT	JQAP01000004.1 Xylella fastidiosa strain ATCC 35879 contig4, whole genome shotgun sequence
49	90939	90987	CGCCACGTGCCTCCAGGGCGCGACGCCCGAATCCTCGACATGTTCAAAG	JQAP01000004.1 Xylella fastidiosa strain ATCC 35879 contig4, whole genome shotgun sequence
49	106035	106083	CGTGGTTTCGGCGCTGTCTGGCGTGACCAATGAACTGACGGCGATTGCT	JQAP01000002.1 Xylella fastidiosa strain ATCC 35879 contig2, whole genome shotgun sequence
49	117735	117783	GATCGCTGGGCTCACTGGCTGCGACTTTCATCTGCGTAACAAACTAAAC	JQAP01000014.1 Xylella fastidiosa strain ATCC 35879 contig14, whole genome shotgun sequence
49	143308	143356	GTTGAATAAGCCTTTGGCTGGTCCGACAGGGTCGGTTGAGTCGACGATA	JQAP01000001.1 Xylella fastidiosa strain ATCC 35879 contig1, whole genome shotgun sequence
49	177725	177773	GTTTCCACGAGCAAATATAAAACTGTCTATAGGCTGAATAATCAACGGG	JQAP01000014.1 Xylella fastidiosa strain ATCC 35879 contig14, whole genome shotgun sequence
49	178238	178286	ATCAAAGCGATCCAAATGCATAACTTTACTCCAAGCTGCGACAAAATCG	JQAP01000014.1 Xylella fastidiosa strain ATCC 35879 contig14, whole genome shotgun sequence
49	185642	185690	GAGAGGTAGCGTTTGCGCCTCATTGTATGCGGGAACTACAACAGTGAGG	JQAP01000001.1 Xylella fastidiosa strain ATCC 35879 contig1, whole genome shotgun sequence
49	190258	190306	GATTACTTTTCGGATATCTACCTCTTGTTGTTTTGCAAGTGTCATTGGG	JQAP01000001.1 Xylella fastidiosa strain ATCC 35879 contig1, whole genome shotgun sequence
49	194004	194052	CGTGTTTGTGCGGTGCACGTAAAGGTAGGGGCTGGCGGTGATCCTGACA	JQAP01000004.1 Xylella fastidiosa strain ATCC 35879 contig4, whole genome shotgun sequence
49	222117	222165	GTACAAATATTGATGCTCATATGGATAGAACCTCACGGATGATTTTCAT	JQAP01000015.1 Xylella fastidiosa strain ATCC 35879 contig15, whole genome shotgun sequence
49	222653	222701	TTCGTATTCGCTACTCTTACTAATTGGAAATTGCCAATTCTAAAGATTG	JQAP01000001.1 Xylella fastidiosa strain ATCC 35879 contig1, whole genome shotgun sequence
49	250760	250808	CATCCAGGCGATCACTAAGGAGACTGGAACACAGATCGATATTCAGGAC	JQAP01000001.1 Xylella fastidiosa strain ATCC 35879 contig1, whole genome shotgun sequence
49	301310	301358	CAAGGTGGTAAGGGTGTGTAGGTAGTTAATTTAATGGCTTATAACTATC	JQAP01000004.1 Xylella fastidiosa strain ATCC 35879 contig4, whole genome shotgun sequence
49	332146	332194	AAAATTGGCTGTGCTCGGTGCTGCAGTTCAGGGGGGCATGCTGTGGTTG	JQAP01000001.1 Xylella fastidiosa strain ATCC 35879 contig1, whole genome shotgun sequence
49	364641	364689	TCTCTGCCGATGGGAAAATTGCTGCGGGAACTTCTGAATCAGCAACCCC	JQAP01000004.1 Xylella fastidiosa strain ATCC 35879 contig4, whole genome shotgun sequence
48	31548	31595	TGTTATGGGCACAAACCAGGACCACTCCCACTCTTTTATCCCTTGGCA	JQAP01000014.1 Xylella fastidiosa strain ATCC 35879 contig14, whole genome shotgun sequence
48	44655	44702	CTGGTAAACAGGTTGCTATTAGCCATAGCCACTTGCATGCCTCCTGGA	JQAP01000012.1 Xylella fastidiosa strain ATCC 35879 contig12, whole genome shotgun sequence
48	93128	93175	ACCAAGTTGCAGGTTGCCTAAGAGGAATTCTTCGATCGACCGCAGGCG	JQAP01000004.1 Xylella fastidiosa strain ATCC 35879 contig4, whole genome shotgun sequence
48	93583	93630	CGTTTGTTAGACACGATGCAATGAACTGAGATCACTCCAGTCAACGAC	JQAP01000004.1 Xylella fastidiosa strain ATCC 35879 contig4, whole genome shotgun sequence
48	114022	114069	AAAATCCGCATCAGTCACATCAAATACATGGGATTTATCGGACATAAC	JQAP01000014.1 Xylella fastidiosa strain ATCC 35879 contig14, whole genome shotgun sequence
48	120278	120325	GTGTGCGTCATCGAGATGGGGCAGGGGTCGGTGTGCGTGTGGTTATGG	JQAP01000002.1 Xylella fastidiosa strain ATCC 35879 contig2, whole genome shotgun sequence
48	148459	148506	CGTCTTTCCTTAAAAAAGGTTATTTCAAGTTATGCTTCTTCTTATGAA	JQAP01000002.1 Xylella fastidiosa strain ATCC 35879 contig2, whole genome shotgun sequence
48	161369	161416	TCAGCGCTGTCAGTGTCACCACTTTTTGATGGTGTATTCAAATTCGCT	JQAP01000004.1 Xylella fastidiosa strain ATCC 35879 contig4, whole genome shotgun sequence
48	230310	230357	CCATACAACCAGTCGTAGCAGATGCATCCATCCTATCTATAGGCATGA	JQAP01000014.1 Xylella fastidiosa strain ATCC 35879 contig14, whole genome shotgun sequence
48	251417	251464	GGGAACAACGACGGCAGCAACCGGCGGCGCCGTGGTCGTCGTGGTGGT	JQAP01000015.1 Xylella fastidiosa strain ATCC 35879 contig15, whole genome shotgun sequence
48	271383	271430	GATCACGAATGGAACGGGTGTTGATAGTGATGTGGGCACTGATACAAC	JQAP01000004.1 Xylella fastidiosa strain ATCC 35879 contig4, whole genome shotgun sequence
48	282716	282763	CCCATTACTTTCAACTACCAAGAAACCATAAATTGAATTTTGAATTTC	JQAP01000015.1 Xylella fastidiosa strain ATCC 35879 contig15, whole genome shotgun sequence
48	379920	379967	ATTTGAGTAATGCGGCCCTTGCATCCATCAAACACATCCGTTCCGACG	JQAP01000014.1 Xylella fastidiosa strain ATCC 35879 contig14, whole genome shotgun sequence
48	444995	445042	AATGCGTACTCGCTCGTTGTACCGCAGTAGGTGGGGTGAGGTGTAGGT	JQAP01000004.1 Xylella fastidiosa strain ATCC 35879 contig4, whole genome shotgun sequence
48	455775	455822	CATCATTCCAGGCTTGGAGAAGGCAATGCTGGACAAGCACGCTGGGGA	JQAP01000014.1 Xylella fastidiosa strain ATCC 35879 contig14, whole genome shotgun sequence
48	480548	480595	CTGAGAGCGATGATGTTGCTATTGTCATCAAAAAAGCGCTTCAAACCG	JQAP01000004.1 Xylella fastidiosa strain ATCC 35879 contig4, whole genome shotgun sequence
48	496299	496346	ATCAAAGTGTCACGAAACACGTCCCAACTCAGAGCATCAACATGTCCA	JQAP01000004.1 Xylella fastidiosa strain ATCC 35879 contig4, whole genome shotgun sequence
48	497253	497300	GGCACCTTACGCCTGCCAGGGTGGCCATGCGGCGCGGTCCACGAAGCT	JQAP01000004.1 Xylella fastidiosa strain ATCC 35879 contig4, whole genome shotgun sequence
48	746183	746230	CCCAATGTCCATGGACTCATTAATTGACCGTACTGGATTGACGGCAGC	JQAP01000014.1 Xylella fastidiosa strain ATCC 35879 contig14, whole genome shotgun sequence
47	70298	70344	CATTGAGATCAAAAACTTGACTTAATTATTTTCAACTTATAGGATTT	JQAP01000012.1 Xylella fastidiosa strain ATCC 35879 contig12, whole genome shotgun sequence
47	105411	105457	ATTGAACCGTTTGTTCCTTTAAACGTTGTCTAAGTACGGATTGATAA	JQAP01000002.1 Xylella fastidiosa strain ATCC 35879 contig2, whole genome shotgun sequence
47	112394	112440	AATGCGTTTCCATTTTTCCGGCTGCGCCCAGCCATACCACTGGTACA	JQAP01000015.1 Xylella fastidiosa strain ATCC 35879 contig15, whole genome shotgun sequence
47	147742	147788	GATCGTGTTGGTTTTAAAATTTTAGGCGATGGTTGTAAGTTGCGTAT	JQAP01000002.1 Xylella fastidiosa strain ATCC 35879 contig2, whole genome shotgun sequence
47	167469	167515	TGGAGTGAGTTTCAGGCTCGATCTCAGCAAACCCAATTTCGCCATTA	JQAP01000015.1 Xylella fastidiosa strain ATCC 35879 contig15, whole genome shotgun sequence
47	188203	188249	CCGCTGCGACTCAGTCAATGAGGGGTAGATTGCATCGTTCATTAGTC	JQAP01000001.1 Xylella fastidiosa strain ATCC 35879 contig1, whole genome shotgun sequence
47	222821	222867	GCGAGGGGCAAATCAATCGGAGCTTCGCTCTACTGTTGTTAGTCGCC	JQAP01000015.1 Xylella fastidiosa strain ATCC 35879 contig15, whole genome shotgun sequence
47	244226	244272	GCTGATTGATCGTGGCGTGGTCGCTCGTCTGGACTATGTGCAATGCA	JQAP01000004.1 Xylella fastidiosa strain ATCC 35879 contig4, whole genome shotgun sequence
47	256158	256204	ATGCGCATTCAGTCTTGAGAAGATGTAATAAGGCTGAAGGCCTATGT	JQAP01000004.1 Xylella fastidiosa strain ATCC 35879 contig4, whole genome shotgun sequence
47	269749	269795	CTCAAATTCTTTATGCGCCTTTATACAACCAGGCTTCGCCAACACCT	JQAP01000015.1 Xylella fastidiosa strain ATCC 35879 contig15, whole genome shotgun sequence
47	286263	286309	AATCAAAGCCACCCAACAACAAACTTAGTATAGTAATCATGACAATT	JQAP01000015.1 Xylella fastidiosa strain ATCC 35879 contig15, whole genome shotgun sequence
47	287136	287182	CTCAAATTCTTTATGCGCCTTTATACAACCAGGCTTCGCCAACACCT	JQAP01000015.1 Xylella fastidiosa strain ATCC 35879 contig15, whole genome shotgun sequence
47	298354	298400	AACAAAGTCTCCAAAAGCCCATACCCCAGTACGGGAAAATCATCAAC	JQAP01000014.1 Xylella fastidiosa strain ATCC 35879 contig14, whole genome shotgun sequence
47	311574	311620	ATTGAAATCTCCCCAAAGAAATAACCTCACAAATGACTGGAAACTAA	JQAP01000015.1 Xylella fastidiosa strain ATCC 35879 contig15, whole genome shotgun sequence
47	316305	316351	AATGCCGCAGACTCTATAAAATAAACATGAGCTTAAATGACATATTA	JQAP01000015.1 Xylella fastidiosa strain ATCC 35879 contig15, whole genome shotgun sequence
46	1014	1059	AACTATTGAATTCTCACAAGAGACCTTAAGAGATTTATTGCGTGCA	JQAP01000001.1 Xylella fastidiosa strain ATCC 35879 contig1, whole genome shotgun sequence
46	31438	31483	GTTAACGGCTACCGCTTCTATTCCTATCACCAAACGTTGTTATTTG	JQAP01000014.1 Xylella fastidiosa strain ATCC 35879 contig14, whole genome shotgun sequence
46	54472	54517	CGGTGTGTTGGTTTCTGGCCATATCCATACATTTCTATCGTTAAGG	JQAP01000004.1 Xylella fastidiosa strain ATCC 35879 contig4, whole genome shotgun sequence
46	68344	68389	CACCTTTACCTGGCCGCGCCGATACCTTGACGGGGGTACGATACTC	JQAP01000012.1 Xylella fastidiosa strain ATCC 35879 contig12, whole genome shotgun sequence
46	74568	74613	TAAAAAGCCTGTGTTTCAAGGTTGGGATGGCGCACACATTGGATGG	JQAP01000004.1 Xylella fastidiosa strain ATCC 35879 contig4, whole genome shotgun sequence
46	90707	90752	GCCCGGTGGGGCGAACCGATAAGACTTTGGGAACGTTTGGAGTATT	JQAP01000004.1 Xylella fastidiosa strain ATCC 35879 contig4, whole genome shotgun sequence
46	91762	91807	CCACCAGTTCTTTGACAGTGATCTCCGCGGCGCACTCTGCAAATGA	JQAP01000004.1 Xylella fastidiosa strain ATCC 35879 contig4, whole genome shotgun sequence
46	96035	96080	ATCACTGAGAATGAGTGCATGTCTGCCGCGGATGGTGGCGGCCAGG	JQAP01000004.1 Xylella fastidiosa strain ATCC 35879 contig4, whole genome shotgun sequence
46	151611	151656	TGGGAAATTTTGGTAATCGCTTCGCTAAGTCGATCGAGCTTCGTAA	JQAP01000002.1 Xylella fastidiosa strain ATCC 35879 contig2, whole genome shotgun sequence
46	154754	154799	TGGTGTGTTGCATGAGTACACAACAGTCGAAGGTTTGCAGGAAGAT	JQAP01000002.1 Xylella fastidiosa strain ATCC 35879 contig2, whole genome shotgun sequence
46	184663	184708	TTACGTGCATCAAGCATTTGCCCATGCGATTGAGCTAGAAACACAG	JQAP01000002.1 Xylella fastidiosa strain ATCC 35879 contig2, whole genome shotgun sequence
46	185841	185886	ATTTTGCATACACTGTTTTTTGTATAGATTGTGCGATCAACATCCG	JQAP01000001.1 Xylella fastidiosa strain ATCC 35879 contig1, whole genome shotgun sequence
46	207092	207137	TAATAAATAATGCAAACGACGTTACTGGTTCTTTGGGGAGACAATC	JQAP01000004.1 Xylella fastidiosa strain ATCC 35879 contig4, whole genome shotgun sequence
46	244937	244982	GGCACAACCAACCAAAACGAGAGAGAAAAGAGTGGCGATCACAAAA	JQAP01000014.1 Xylella fastidiosa strain ATCC 35879 contig14, whole genome shotgun sequence
46	249302	249347	ACCTGATTGAGCAGGATCACCCAAGTATTAAACGTCGGAGTCGACC	JQAP01000014.1 Xylella fastidiosa strain ATCC 35879 contig14, whole genome shotgun sequence
46	274379	274424	CGTTTCTTGGAAAGAAGCTGCGGAAATGAACGATTCCGTTGCCAAA	JQAP01000015.1 Xylella fastidiosa strain ATCC 35879 contig15, whole genome shotgun sequence
46	276217	276262	GATCAACGATTTCACCATCGGCGTTAACCACTCTCTCAGTGCCGAT	JQAP01000015.1 Xylella fastidiosa strain ATCC 35879 contig15, whole genome shotgun sequence
46	332336	332381	CTTTTATTATTATCCACACTGCGGAAATCATGCCTTAATGTCTGCG	JQAP01000015.1 Xylella fastidiosa strain ATCC 35879 contig15, whole genome shotgun sequence
46	337294	337339	GATTGGCAACAGCTTGTTCAATTTTGATGACAATGCCGGGCCGAAT	JQAP01000001.1 Xylella fastidiosa strain ATCC 35879 contig1, whole genome shotgun sequence
46	349806	349851	AGGGGGACATTTCGCCATTGGCACGGTGTCGGATCAGGATGCGTTT	JQAP01000014.1 Xylella fastidiosa strain ATCC 35879 contig14, whole genome shotgun sequence
46	439752	439797	GGTGGTGGCTGAGGTAATGTCGGGCGTGTCGGTCGAGTCGTTGAAC	JQAP01000004.1 Xylella fastidiosa strain ATCC 35879 contig4, whole genome shotgun sequence
46	589117	589162	GGTGGAATTCCCATCATCAGCGCCCTTTGAAACGCGTATCTCAAAA	JQAP01000014.1 Xylella fastidiosa strain ATCC 35879 contig14, whole genome shotgun sequence
46	709097	709142	ATCAGCGGAAAGCGCGAAAGTTGCCTTGGGGTACTGGTCAGACTTT	JQAP01000014.1 Xylella fastidiosa strain ATCC 35879 contig14, whole genome shotgun sequence
46	710855	710900	TTCTATCTCAGGATCAATCAAGCCGGTCGGACGCACCAGCAACTCT	JQAP01000014.1 Xylella fastidiosa strain ATCC 35879 contig14, whole genome shotgun sequence
45	44685	44729	GCACTGTGTTTAGTATTTGGTGGATGTGTTTTTGACAGTTCCCAT	JQAP01000002.1 Xylella fastidiosa strain ATCC 35879 contig2, whole genome shotgun sequence
45	60289	60333	TAGTACATATTCAACTTGTTGTTTATATTGAGTGTTCGTTGTAAG	JQAP01000001.1 Xylella fastidiosa strain ATCC 35879 contig1, whole genome shotgun sequence
45	62667	62711	TCCGCAGTCACTTGTGCAAGCGAATAGCTGCATGGTTAAAGAGAA	JQAP01000001.1 Xylella fastidiosa strain ATCC 35879 contig1, whole genome shotgun sequence
45	64863	64907	CCTGAAGTCGGCAGATGATGCAATCTCAATAAAACAGACGAATAA	JQAP01000016.1 Xylella fastidiosa strain ATCC 35879 contig16, whole genome shotgun sequence
45	70846	70890	TGCGAGAAGGTGAATCTTCCAATTGGTTGATTGCACTCTCCAACC	JQAP01000001.1 Xylella fastidiosa strain ATCC 35879 contig1, whole genome shotgun sequence
45	81442	81486	TGAAACCTACTTGTATCCGCAAGCCGCAAGCTTAGAGTTCCCACA	JQAP01000015.1 Xylella fastidiosa strain ATCC 35879 contig15, whole genome shotgun sequence
45	104326	104370	GAGGGTAGGCCGTTACAATTCCACACTTACCTCGCCATCCTGGCG	JQAP01000001.1 Xylella fastidiosa strain ATCC 35879 contig1, whole genome shotgun sequence
45	166911	166955	GAAGTTAACAGTCTACTTTTACCAAATTCTAGGAACCAGCTGGAT	JQAP01000015.1 Xylella fastidiosa strain ATCC 35879 contig15, whole genome shotgun sequence
45	176031	176075	TGCGAGAAGGTGAATCTTCCAATTGGTTGATTGCACTCTCCAACC	JQAP01000001.1 Xylella fastidiosa strain ATCC 35879 contig1, whole genome shotgun sequence
45	364549	364593	CGCAACGATCTGGTCAGAAAGAAATTGGGAGAACAAAACTGACCT	JQAP01000004.1 Xylella fastidiosa strain ATCC 35879 contig4, whole genome shotgun sequence
45	568789	568833	TGCCAAACGACGCTCGCTGAAAGCACGCGCTTCAAAATAGCGATG	JQAP01000014.1 Xylella fastidiosa strain ATCC 35879 contig14, whole genome shotgun sequence
44	1822	1865	CGGAAAGTGGGGAGATTACTATCCCTGCACGTAAAATTTATGAA	JQAP01000001.1 Xylella fastidiosa strain ATCC 35879 contig1, whole genome shotgun sequence
44	4563	4606	TTTAGGATGGAAATTAGCGCCTTGATGCGTCTGAATTTTGAAGT	JQAP01000001.1 Xylella fastidiosa strain ATCC 35879 contig1, whole genome shotgun sequence
44	92553	92596	TTATTCAATGCCAGGCGTGATCCGACTGCAATGGCTTCGAACCT	JQAP01000004.1 Xylella fastidiosa strain ATCC 35879 contig4, whole genome shotgun sequence
44	106300	106343	GCCTACCTGGGTGCTTCGGGTATTGATATCGGTTGGATGGATGC	JQAP01000002.1 Xylella fastidiosa strain ATCC 35879 contig2, whole genome shotgun sequence
44	230938	230981	GTGACTCCAGCAGCGTACGGATCCCCAGAGGAAGTTCAAGTAAA	JQAP01000014.1 Xylella fastidiosa strain ATCC 35879 contig14, whole genome shotgun sequence
44	244963	245006	CAATGGTGGGGTGCGGCATAAGGCTCGTGGTTCGCATGTGATTG	JQAP01000001.1 Xylella fastidiosa strain ATCC 35879 contig1, whole genome shotgun sequence
44	331669	331712	CCCTGTCTCCCGACAATACAATAACTGCAACACCATCCAGGAAG	JQAP01000014.1 Xylella fastidiosa strain ATCC 35879 contig14, whole genome shotgun sequence
44	349747	349790	GGCAGGATCTATCCGTTGGCGCGGACGATGATCCCTCGTGACAT	JQAP01000014.1 Xylella fastidiosa strain ATCC 35879 contig14, whole genome shotgun sequence
44	460047	460090	GATCAGCCTCAAAAAGTCACCTTACCTAGTCAATGCAGCCCCGC	JQAP01000014.1 Xylella fastidiosa strain ATCC 35879 contig14, whole genome shotgun sequence
44	499280	499323	CGCTGACACACCACTCACAACGTGTTAGCGCTTTAATCACAACA	JQAP01000014.1 Xylella fastidiosa strain ATCC 35879 contig14, whole genome shotgun sequence
44	593111	593154	CTGCACATTAAAGCGTTGGTGGTTTTTTTATCTTTACCCTGAGA	JQAP01000014.1 Xylella fastidiosa strain ATCC 35879 contig14, whole genome shotgun sequence
43	753	795	ATGTGATCGTTATCCTAGAGAAGTTAATGGTCTAGAACCACGA	JQAP01000001.1 Xylella fastidiosa strain ATCC 35879 contig1, whole genome shotgun sequence
43	891	933	TGGCGCTACGATTCCAGATGAGGTTGCATTCTTAATTGCAAAA	JQAP01000001.1 Xylella fastidiosa strain ATCC 35879 contig1, whole genome shotgun sequence
43	1679	1721	TAAATGATCTGCTTCGCACCTAGCCTTGATCACCGCTTGATCA	JQAP01000012.1 Xylella fastidiosa strain ATCC 35879 contig12, whole genome shotgun sequence
43	2030	2072	AGTTTTATTAAAGGAACTCATTGAGCGTACTGCTTTTGCAATG	JQAP01000001.1 Xylella fastidiosa strain ATCC 35879 contig1, whole genome shotgun sequence
43	2189	2231	ACAAGCTAAAGATCTTAAACGCCAGATTATTTTGCCGCGTAAA	JQAP01000001.1 Xylella fastidiosa strain ATCC 35879 contig1, whole genome shotgun sequence
43	2351	2393	TGGTTCTTTCCCAGATTATGAGGGAGTGATACCAATCGGTGCT	JQAP01000001.1 Xylella fastidiosa strain ATCC 35879 contig1, whole genome shotgun sequence
43	2913	2955	TAACATCGGTTGGTGCATAGTCGAATGAACTGGTGGTGTGTAC	JQAP01000002.1 Xylella fastidiosa strain ATCC 35879 contig2, whole genome shotgun sequence
43	2967	3009	TGGGGCGAACATCGTGAAAGGCTTCGCAGAGGTAGAACAACGT	JQAP01000004.1 Xylella fastidiosa strain ATCC 35879 contig4, whole genome shotgun sequence
43	3043	3085	GATGCACATCACTCAGCTCGTCTTACGTCATTTTCGTTGTTTT	JQAP01000001.1 Xylella fastidiosa strain ATCC 35879 contig1, whole genome shotgun sequence
43	3409	3451	AAGTAGTTACCAACTCATCAATAGTAACGCCGAATTACGACGT	JQAP01000001.1 Xylella fastidiosa strain ATCC 35879 contig1, whole genome shotgun sequence
43	3995	4037	CAATGGCGCGTGTTAGAGATGCTAGCTGAAATTCCAGCCCAGG	JQAP01000001.1 Xylella fastidiosa strain ATCC 35879 contig1, whole genome shotgun sequence
43	4838	4880	AGCATTCTTGTCAAGATCCATATTGATGGGTCTGTCTCTGTTT	JQAP01000001.1 Xylella fastidiosa strain ATCC 35879 contig1, whole genome shotgun sequence
43	5096	5138	GTTGTCGGGGAACCGCAACTTTGACGGACGCATTCATCCTGAT	JQAP01000004.1 Xylella fastidiosa strain ATCC 35879 contig4, whole genome shotgun sequence
43	5549	5591	AATTACATTGAGCAGAATGGGGTTGCTAGGCAAGCGAAGATCA	JQAP01000001.1 Xylella fastidiosa strain ATCC 35879 contig1, whole genome shotgun sequence
43	6361	6403	ATTACTCCCCGCTGAAGGTGAGCCGCCCATTGAGGGTCTTGCA	JQAP01000001.1 Xylella fastidiosa strain ATCC 35879 contig1, whole genome shotgun sequence
43	6890	6932	GGTGAAATGAATCCGGAGCAGTTATGGGATACTACGGTGAATC	JQAP01000001.1 Xylella fastidiosa strain ATCC 35879 contig1, whole genome shotgun sequence
43	7041	7083	CATGATGGAGGGGGCTGCTTTTCCGGGGGCTGAAGTGCGCTTG	JQAP01000004.1 Xylella fastidiosa strain ATCC 35879 contig4, whole genome shotgun sequence
43	7731	7773	GATCACTTTAAGTGGTTTAGCTTTTGCCTTTTTGCACGAAATT	JQAP01000001.1 Xylella fastidiosa strain ATCC 35879 contig1, whole genome shotgun sequence
43	7939	7981	TTTGGGATGTACTAATTTTTATGAAACATTAAACGCATTTGAA	JQAP01000001.1 Xylella fastidiosa strain ATCC 35879 contig1, whole genome shotgun sequence
43	9366	9408	TCAAAGATACCCATGTTTTGCGCCCCAGACACCAGCCAGAATT	JQAP01000008.1 Xylella fastidiosa strain ATCC 35879 contig8, whole genome shotgun sequence
43	11255	11297	AGTGACTGGACAGGCGATCCGTGAGGTCAAAACGTCCGAGATC	JQAP01000002.1 Xylella fastidiosa strain ATCC 35879 contig2, whole genome shotgun sequence
43	12081	12123	GAGTAGCAACACCTCACCTGGCTTGAACTGCGCCACCTCATCC	JQAP01000008.1 Xylella fastidiosa strain ATCC 35879 contig8, whole genome shotgun sequence
43	13469	13511	GCAACTGTCGGTAGACGGATAGGGCCACCTCAGGCAAATCCGC	JQAP01000015.1 Xylella fastidiosa strain ATCC 35879 contig15, whole genome shotgun sequence
43	13521	13563	GTCGAGCAAGGAACGACGATATTTACGCGCACTCACATGATGC	JQAP01000015.1 Xylella fastidiosa strain ATCC 35879 contig15, whole genome shotgun sequence
43	13790	13832	TTATGTCTATAACAGCTTTGGCAGTGATGGGCGATTGCAACCG	JQAP01000002.1 Xylella fastidiosa strain ATCC 35879 contig2, whole genome shotgun sequence
43	14809	14851	GGTTGCAGCGATTTGGTACAGACGGTGTACACCTGTGGTGGTT	JQAP01000002.1 Xylella fastidiosa strain ATCC 35879 contig2, whole genome shotgun sequence
43	14893	14935	CCCCCTACAGCGTAGATCGAACAAATAGCACGGCTACAGCAAG	JQAP01000014.1 Xylella fastidiosa strain ATCC 35879 contig14, whole genome shotgun sequence
43	16076	16118	CATTGCGGTGTACCGCATGGTTGCTGGTGAACGCGTCCGGTTT	JQAP01000012.1 Xylella fastidiosa strain ATCC 35879 contig12, whole genome shotgun sequence
43	18311	18353	TTTTGGTGTTCAGTATGGGATACAAATATCGGGGCATTGTCTA	JQAP01000002.1 Xylella fastidiosa strain ATCC 35879 contig2, whole genome shotgun sequence
43	18587	18629	TTTGATAGGTGGTTCCAGATTTGGTGCTGGTTGTGGTAGCTGT	JQAP01000002.1 Xylella fastidiosa strain ATCC 35879 contig2, whole genome shotgun sequence
43	22893	22935	GGTCTCAGCCATCGCGCGCACTAGGCCGACAAAATGACTCTCA	JQAP01000015.1 Xylella fastidiosa strain ATCC 35879 contig15, whole genome shotgun sequence
43	23516	23558	CGCGGTGGGACCTTTCAGTAGGGTATTGTGCAGTCATGGCCTA	JQAP01000014.1 Xylella fastidiosa strain ATCC 35879 contig14, whole genome shotgun sequence
43	26725	26767	GGTCGCACACTACAGCCGACGTTGAGCTTCAATACACATCACC	JQAP01000015.1 Xylella fastidiosa strain ATCC 35879 contig15, whole genome shotgun sequence
43	28754	28796	ACGTGCCGAATAAGCCAACATTACGGGTGCTTCGAAGCCCGGA	JQAP01000012.1 Xylella fastidiosa strain ATCC 35879 contig12, whole genome shotgun sequence
43	29839	29881	GAGAGCACCCCACTCACTCCAACCACAAACAAACCAGCATTGC	JQAP01000015.1 Xylella fastidiosa strain ATCC 35879 contig15, whole genome shotgun sequence
43	30094	30136	GACGTACAGAAATTCGTCAACACCACCTTAGGTACTGGTATGG	JQAP01000015.1 Xylella fastidiosa strain ATCC 35879 contig15, whole genome shotgun sequence
43	30286	30328	CAATGAGCGTCCTTCTGAGACACTGATGCTGGCGACCTGATTC	JQAP01000002.1 Xylella fastidiosa strain ATCC 35879 contig2, whole genome shotgun sequence
43	31969	32011	AGCGCATAAAAATTAAACACACTACAGGCTCTAAATATTTTCT	JQAP01000014.1 Xylella fastidiosa strain ATCC 35879 contig14, whole genome shotgun sequence
43	32159	32201	CATACTTCCTTTATTGCTATGCACCTCCGCCACATCGGCTCAA	JQAP01000014.1 Xylella fastidiosa strain ATCC 35879 contig14, whole genome shotgun sequence
43	32540	32582	GCACGAGCGTGACAGATTCGCGACCTACGACCGTTTGACAACC	JQAP01000014.1 Xylella fastidiosa strain ATCC 35879 contig14, whole genome shotgun sequence
43	33374	33416	CGTCATGCGTTGCTCCAATCCTAGCCGACGTAACCCCGCACAA	JQAP01000014.1 Xylella fastidiosa strain ATCC 35879 contig14, whole genome shotgun sequence
43	33431	33473	CTGGTGTTGTCTACGGAAGCTTTGTACGCGCTGCAATTGTGCG	JQAP01000002.1 Xylella fastidiosa strain ATCC 35879 contig2, whole genome shotgun sequence
43	33856	33898	ATCTGTTATTCGTGATGCTGAAACGGGTGAGAAGGTTGTGACA	JQAP01000002.1 Xylella fastidiosa strain ATCC 35879 contig2, whole genome shotgun sequence
43	34224	34266	TTTTAAATACATGGATTTTGTCCGTAATGTCTGGTTTTGAAGC	JQAP01000002.1 Xylella fastidiosa strain ATCC 35879 contig2, whole genome shotgun sequence
43	34240	34282	CGCAATCCGCCGCGGATACGCACGCACAAATGAGTACGTGGTG	JQAP01000014.1 Xylella fastidiosa strain ATCC 35879 contig14, whole genome shotgun sequence
43	34412	34454	ATTGGCTGGACTGTACGCTCCACACAGGAAGAAACATTGGCAT	JQAP01000012.1 Xylella fastidiosa strain ATCC 35879 contig12, whole genome shotgun sequence
43	34658	34700	CAAGCCCTGCATTTTATTTACTCAGGTTCTGGATGACAGGCCA	JQAP01000012.1 Xylella fastidiosa strain ATCC 35879 contig12, whole genome shotgun sequence
43	35071	35113	GACCTTCAGCCTCAACAGCCGTGGATATGCAGAGATGATCGAG	JQAP01000002.1 Xylella fastidiosa strain ATCC 35879 contig2, whole genome shotgun sequence
43	35230	35272	ACCACCGGGATCTCCCCAGGGGCCAGGACATGCTCAAGCTTCC	JQAP01000004.1 Xylella fastidiosa strain ATCC 35879 contig4, whole genome shotgun sequence
43	35257	35299	TGCCTGTAAGGCATTCACCTCTGCACGGGCATGCGCCTGTAGT	JQAP01000014.1 Xylella fastidiosa strain ATCC 35879 contig14, whole genome shotgun sequence
43	35324	35366	TAAAAATAGTGGAGCACCAAAACTGTGATCAGTAGTGTGATGG	JQAP01000014.1 Xylella fastidiosa strain ATCC 35879 contig14, whole genome shotgun sequence
43	35569	35611	CGCTAACCACATTGCCATACCGCTTGCTGACAGGAAACGAGAG	JQAP01000014.1 Xylella fastidiosa strain ATCC 35879 contig14, whole genome shotgun sequence
43	35638	35680	GTGCAGCGAGAAGCGTTCTTCATTCTGTGATAACACCTTCCCT	JQAP01000016.1 Xylella fastidiosa strain ATCC 35879 contig16, whole genome shotgun sequence
43	35690	35732	TGCACCTCGGAAGATGTTACCGCCGCCGATCACCAAGGCTAAC	JQAP01000002.1 Xylella fastidiosa strain ATCC 35879 contig2, whole genome shotgun sequence
43	35840	35882	CTTCACAGTCTCCTTGTGCAGTGCGTCCTTGCGCGATGCCTTC	JQAP01000016.1 Xylella fastidiosa strain ATCC 35879 contig16, whole genome shotgun sequence
43	36000	36042	CAGACACAGCAGCCGGTGGTATCGGGGCAGCGACGTCCTCCGA	JQAP01000004.1 Xylella fastidiosa strain ATCC 35879 contig4, whole genome shotgun sequence
43	36142	36184	ATCGCGGACCTTGCAACCATTAACCACGCTCCCCTCCTCTGAA	JQAP01000004.1 Xylella fastidiosa strain ATCC 35879 contig4, whole genome shotgun sequence
43	36172	36214	CAACTGCAGCTTCAATCCCAGTCTGGTCGGCACGTTGATTGAA	JQAP01000014.1 Xylella fastidiosa strain ATCC 35879 contig14, whole genome shotgun sequence
43	36421	36463	CATTTCCACACCATCGGCATACACAGCATCGCCGACACGCAAC	JQAP01000004.1 Xylella fastidiosa strain ATCC 35879 contig4, whole genome shotgun sequence
43	36489	36531	AAGTTCGGCGACACGTATCAATACCTTCGATGGTGCTGTTTCC	JQAP01000014.1 Xylella fastidiosa strain ATCC 35879 contig14, whole genome shotgun sequence
43	36685	36727	CACGCTCGGGGTACTGTTGGTGAATATTTCTATTGGTGGCACC	JQAP01000001.1 Xylella fastidiosa strain ATCC 35879 contig1, whole genome shotgun sequence
43	36812	36854	GCGACTGCAAATACATCACAATAGGAGCCATCAACGCCGCTAG	JQAP01000014.1 Xylella fastidiosa strain ATCC 35879 contig14, whole genome shotgun sequence
43	36981	37023	GGTAAAAATCCACAATACATCGCCATCTGTACGTCCATGCCAA	JQAP01000014.1 Xylella fastidiosa strain ATCC 35879 contig14, whole genome shotgun sequence
43	37607	37649	TCGCAGCAACTAGGCGGACGACTGTATCCCCAGTCATCACACT	JQAP01000014.1 Xylella fastidiosa strain ATCC 35879 contig14, whole genome shotgun sequence
43	37712	37754	TGTTACCTGCCTTGCGTCCAGTGTTATCTGCGCGGCGCCTATA	JQAP01000014.1 Xylella fastidiosa strain ATCC 35879 contig14, whole genome shotgun sequence
43	38012	38054	CTCCCAGAAGCGACGCAACACACTGGCGTTGGCACCTTCACGT	JQAP01000012.1 Xylella fastidiosa strain ATCC 35879 contig12, whole genome shotgun sequence
43	38328	38370	CCTAGCGCAGTTTCGATGATACTGCGCGCAGTCTGCCCCTCGA	JQAP01000012.1 Xylella fastidiosa strain ATCC 35879 contig12, whole genome shotgun sequence
43	38407	38449	CACCGATATCCTGGGGTACCAAGTCCCTGCGAGTGGACAGAAT	JQAP01000012.1 Xylella fastidiosa strain ATCC 35879 contig12, whole genome shotgun sequence
43	38966	39008	GCTGACACAGATGACACGTGATTGGGCAATCCAGACACTGAAT	JQAP01000004.1 Xylella fastidiosa strain ATCC 35879 contig4, whole genome shotgun sequence
43	39003	39045	GACGGCGATCCAGTGGATGGTATGGTTGGTTGAGCCGCCTGTA	JQAP01000002.1 Xylella fastidiosa strain ATCC 35879 contig2, whole genome shotgun sequence
43	39114	39156	CTGCCCCAGTGCGGTGATGTGTAGGACGCGTTCTGTGGCGGCT	JQAP01000002.1 Xylella fastidiosa strain ATCC 35879 contig2, whole genome shotgun sequence
43	39276	39318	TCCGGGGGCGTGGTAGGAGGCGGCCTCGACTGCGAGCAGTTCA	JQAP01000002.1 Xylella fastidiosa strain ATCC 35879 contig2, whole genome shotgun sequence
43	39431	39473	CATGAGCAGCAGCAAGAACAACGCTCATCATTCATAACGACAG	JQAP01000014.1 Xylella fastidiosa strain ATCC 35879 contig14, whole genome shotgun sequence
43	39454	39496	TACACATTCCAATTCAGCAAGCAACTCGCACACATCAACATCA	JQAP01000015.1 Xylella fastidiosa strain ATCC 35879 contig15, whole genome shotgun sequence
43	39495	39537	AATCTGCTTCCTCATCACCAGCACACACGACAGTACGTGCAAC	JQAP01000014.1 Xylella fastidiosa strain ATCC 35879 contig14, whole genome shotgun sequence
43	39670	39712	AGCCTATGCAATGCAGTGGCAATTGCACGATGCGCGCCGACGT	JQAP01000012.1 Xylella fastidiosa strain ATCC 35879 contig12, whole genome shotgun sequence
43	39805	39847	CACTGTCGTTTCCAACCACAATGAGTTTGCCCCTTTAACGGCC	JQAP01000012.1 Xylella fastidiosa strain ATCC 35879 contig12, whole genome shotgun sequence
43	40072	40114	AGCACACGCACGCGGGGTAAAAATCATCGGTGCCACTGCACAC	JQAP01000012.1 Xylella fastidiosa strain ATCC 35879 contig12, whole genome shotgun sequence
43	40370	40412	AATCGAGTCTTCGGGTCACTTGCAGCAAGCACAAATGACGCAG	JQAP01000012.1 Xylella fastidiosa strain ATCC 35879 contig12, whole genome shotgun sequence
43	40372	40414	GACGATGATTTTTTCGCACGGCTTGAATACTCCCCACATCAAT	JQAP01000004.1 Xylella fastidiosa strain ATCC 35879 contig4, whole genome shotgun sequence
43	41316	41358	AGCAGCGGCCGTTGCGAATCATCAGGCCGCCGACGCCTAGGCC	JQAP01000002.1 Xylella fastidiosa strain ATCC 35879 contig2, whole genome shotgun sequence
43	41365	41407	ATTAAATCCACCTTAAGGACGCCATTGATGAAAATATTCGGTC	JQAP01000015.1 Xylella fastidiosa strain ATCC 35879 contig15, whole genome shotgun sequence
43	41481	41523	AACGGCGATGGTGCTGGCGATTTTTTCTGAATGTGTCAGTGCC	JQAP01000004.1 Xylella fastidiosa strain ATCC 35879 contig4, whole genome shotgun sequence
43	41623	41665	CGTACATGAGGAAAATATGCCACCGCAGATTGGCATCGCCCCA	JQAP01000012.1 Xylella fastidiosa strain ATCC 35879 contig12, whole genome shotgun sequence
43	41964	42006	GTCGTGACGTACAAATAGCGCAGGGTTGCCGTTGAATGCGTCG	JQAP01000002.1 Xylella fastidiosa strain ATCC 35879 contig2, whole genome shotgun sequence
43	42153	42195	GGGTTGGTTGTAGGCCATGAGCACGTCCAATAAGCATGTCTAC	JQAP01000004.1 Xylella fastidiosa strain ATCC 35879 contig4, whole genome shotgun sequence
43	42624	42666	TTCGGCGATGAGGATGTGTACGGACTCAATGTGGTTTCGGTTC	JQAP01000002.1 Xylella fastidiosa strain ATCC 35879 contig2, whole genome shotgun sequence
43	42789	42831	GCTTGAATCTGCTATTTTGCGAAGTCGTCCTATCGAACACCAT	JQAP01000015.1 Xylella fastidiosa strain ATCC 35879 contig15, whole genome shotgun sequence
43	43225	43267	GAATATGTTGGAATCACCGTAACATTGGCCGCTTGCTTCGGGG	JQAP01000015.1 Xylella fastidiosa strain ATCC 35879 contig15, whole genome shotgun sequence
43	43842	43884	GGTTTGCACCGCATTCGGCACCCCGATACAGCTGTATCAGGGT	JQAP01000012.1 Xylella fastidiosa strain ATCC 35879 contig12, whole genome shotgun sequence
43	43947	43989	ACATGGTCCTAATTTGAATTTACTTGGTACCCGTGAACCTGAG	JQAP01000001.1 Xylella fastidiosa strain ATCC 35879 contig1, whole genome shotgun sequence
43	44002	44044	TACAAACAGTACAAATGAAGATATATTTCTGGCTGAGCGATGT	JQAP01000012.1 Xylella fastidiosa strain ATCC 35879 contig12, whole genome shotgun sequence
43	44026	44068	GCCTTAGCCGAACGCGCTGCGACTGCTGGTCACGGACTGAGTA	JQAP01000001.1 Xylella fastidiosa strain ATCC 35879 contig1, whole genome shotgun sequence
43	44078	44120	CGCTCTATCGCACCCAACATCATGTATTGCAAAAAATGAAGTT	JQAP01000012.1 Xylella fastidiosa strain ATCC 35879 contig12, whole genome shotgun sequence
43	44488	44530	TGGAACGCAGCATGTTGCAGAACTTAGTTGACAAAGCGCATCG	JQAP01000012.1 Xylella fastidiosa strain ATCC 35879 contig12, whole genome shotgun sequence
43	44904	44946	CTTAAGCGTGGCTACCAAGTAGTTAGTTTCCAACGTAGTCACT	JQAP01000012.1 Xylella fastidiosa strain ATCC 35879 contig12, whole genome shotgun sequence
43	44909	44951	TGTGATCCGCTGAGCCATACATCAGGCGTTGGCCGTTGCCTTA	JQAP01000001.1 Xylella fastidiosa strain ATCC 35879 contig1, whole genome shotgun sequence
43	44994	45036	CTTTGAAGCGGGTGACGCTGATTTGTCCCTTGATTTTTTCACG	JQAP01000004.1 Xylella fastidiosa strain ATCC 35879 contig4, whole genome shotgun sequence
43	45130	45172	CCTGTCGTGCTGAGAACATTAACAAGTTAGTGTACACCTCAAC	JQAP01000012.1 Xylella fastidiosa strain ATCC 35879 contig12, whole genome shotgun sequence
43	45267	45309	CCAATTCGGTGATTCCGTCAAGTTGCGCTGCTTGCGTACCTGT	JQAP01000002.1 Xylella fastidiosa strain ATCC 35879 contig2, whole genome shotgun sequence
43	45484	45526	AGTGACACGTCCTTTCGGAGTTAGCCAAGCACTCCAGTGCCAC	JQAP01000002.1 Xylella fastidiosa strain ATCC 35879 contig2, whole genome shotgun sequence
43	45556	45598	GCTGAATTGGGCATGTGCGAAACTCAGTGTATCTGCGCCTGAA	JQAP01000002.1 Xylella fastidiosa strain ATCC 35879 contig2, whole genome shotgun sequence
43	45677	45719	ACCCCTCCCTGGAGAACCACTACTAACGCGTTTTCTCGTTGAG	JQAP01000012.1 Xylella fastidiosa strain ATCC 35879 contig12, whole genome shotgun sequence
43	45839	45881	TTGATGTATCTGTGCAGCAATACCAGCAACTTCATCTCTGGGG	JQAP01000012.1 Xylella fastidiosa strain ATCC 35879 contig12, whole genome shotgun sequence
43	45851	45893	TCGCGGAAAGTTGGTTCTTGAGTTTTATCCATTTCCGGATACA	JQAP01000002.1 Xylella fastidiosa strain ATCC 35879 contig2, whole genome shotgun sequence
43	45983	46025	TTCTGTCTGCTCTGCTCCAGAGGATTCCCAGGAGATAGCGAAA	JQAP01000002.1 Xylella fastidiosa strain ATCC 35879 contig2, whole genome shotgun sequence
43	46026	46068	AAATTGGATAAAATTGTAAGGTTCTAGATCCTTAACAGTTTTA	JQAP01000012.1 Xylella fastidiosa strain ATCC 35879 contig12, whole genome shotgun sequence
43	46342	46384	CACGCCTACGCCGTGCAATCCTCCAGAAAAGGTGTAGTTGCGA	JQAP01000004.1 Xylella fastidiosa strain ATCC 35879 contig4, whole genome shotgun sequence
43	48689	48731	ATGCAGTTTTGACTACCGCCCTGTGCACATGTACACGCTCAGC	JQAP01000002.1 Xylella fastidiosa strain ATCC 35879 contig2, whole genome shotgun sequence
43	48919	48961	TCCGCGTACCGATACCTACGAAATTGATCTAGATACATGCGGC	JQAP01000002.1 Xylella fastidiosa strain ATCC 35879 contig2, whole genome shotgun sequence
43	50607	50649	TTACTCTATTTCCTGTGGTCCTAATAGCGACCATTATCGGATT	JQAP01000001.1 Xylella fastidiosa strain ATCC 35879 contig1, whole genome shotgun sequence
43	50667	50709	CGGCACAGGGGCATCGGCTTTTCTACACGATCAAGCGAAAGTT	JQAP01000001.1 Xylella fastidiosa strain ATCC 35879 contig1, whole genome shotgun sequence
43	50722	50764	GGCATCGTGCCCAACCAGGAAACTAAGGTTTCGGTGCTGGCGC	JQAP01000002.1 Xylella fastidiosa strain ATCC 35879 contig2, whole genome shotgun sequence
43	51451	51493	AGAGTTTTGATTTGTACATTCTTCAGGTTTATTTGGTGTGCCG	JQAP01000001.1 Xylella fastidiosa strain ATCC 35879 contig1, whole genome shotgun sequence
43	52170	52212	GATTGTCTATACCCTGGAAGCATTGGCAGCACATCCGGCGGTG	JQAP01000004.1 Xylella fastidiosa strain ATCC 35879 contig4, whole genome shotgun sequence
43	53150	53192	TGCGCGCTTGCTTGAAGTGCAGCCGGAGTGTGTCAGTGTAAAG	JQAP01000004.1 Xylella fastidiosa strain ATCC 35879 contig4, whole genome shotgun sequence
43	53322	53364	GCCGACGATGGCACGTGAGCTTGCGGCAGCCACTGGCATCAAT	JQAP01000002.1 Xylella fastidiosa strain ATCC 35879 contig2, whole genome shotgun sequence
43	53696	53738	GCAGCCATATTCGTACGTATGTGCTTCGAGTAGAAATTGGCGC	JQAP01000004.1 Xylella fastidiosa strain ATCC 35879 contig4, whole genome shotgun sequence
43	53772	53814	GCTTGCCTTGCTTGTCGTACTTGTTTGGGATCCATTAGCCATT	JQAP01000002.1 Xylella fastidiosa strain ATCC 35879 contig2, whole genome shotgun sequence
43	53989	54031	CACCTCATGTCCGACTTCAGCCAGGCAAGTTCCTGTAACGAGA	JQAP01000014.1 Xylella fastidiosa strain ATCC 35879 contig14, whole genome shotgun sequence
43	54556	54598	CGGAGCGCTGGCTGCAGCAACTGGGGTCAAACTGGAGTTGGAC	JQAP01000012.1 Xylella fastidiosa strain ATCC 35879 contig12, whole genome shotgun sequence
43	54628	54670	GGCCGATGCACGTGGTGAAGCAAACCTCAGTGTACGCCACAAC	JQAP01000012.1 Xylella fastidiosa strain ATCC 35879 contig12, whole genome shotgun sequence
43	54785	54827	CAAAACACAGCACTGGCCTGATTCGATGCATTACACATCTTGA	JQAP01000012.1 Xylella fastidiosa strain ATCC 35879 contig12, whole genome shotgun sequence
43	54856	54898	CTTGCATGCGGGAATCAGTCGTCGCGTTTTTTTCATTTGTTGT	JQAP01000001.1 Xylella fastidiosa strain ATCC 35879 contig1, whole genome shotgun sequence
43	55469	55511	GGCTTCGATAATGCGTAAGTTTGCTTGGTGAGGAATTAACCAA	JQAP01000012.1 Xylella fastidiosa strain ATCC 35879 contig12, whole genome shotgun sequence
43	55706	55748	ATCAGTGCACTACCTGCACCGACTTTGCCAACTCACGCTTGAT	JQAP01000014.1 Xylella fastidiosa strain ATCC 35879 contig14, whole genome shotgun sequence
43	55902	55944	AGTAACGACAACGTTCGATGCTCGTTCCACGTTGCAACTTCAG	JQAP01000002.1 Xylella fastidiosa strain ATCC 35879 contig2, whole genome shotgun sequence
43	55995	56037	CATACTGGTCAATGCGGATGGACACTACTTCATTAACGATCAT	JQAP01000002.1 Xylella fastidiosa strain ATCC 35879 contig2, whole genome shotgun sequence
43	56043	56085	ATTGCGGACCGATGTTGAGTCATTGAAGCGTAGCATTGCTGAT	JQAP01000002.1 Xylella fastidiosa strain ATCC 35879 contig2, whole genome shotgun sequence
43	56327	56369	TTGGTTACTCGTTGTTGCTGCATGTGGTGCTTTACTTGAGGCA	JQAP01000002.1 Xylella fastidiosa strain ATCC 35879 contig2, whole genome shotgun sequence
43	56958	57000	AATATCAATTTGGGTTTGGCGGTAAAGGTTGAGTCGACACGTA	JQAP01000002.1 Xylella fastidiosa strain ATCC 35879 contig2, whole genome shotgun sequence
43	57305	57347	CTATCCTGGTCGGTCTGCTCCTGTGCTGGATAGTGTCAGCTTT	JQAP01000002.1 Xylella fastidiosa strain ATCC 35879 contig2, whole genome shotgun sequence
43	58637	58679	CCAACGTCTGGGTTTGGTCCCAGTGACTGGCAGATGCGTTTAC	JQAP01000002.1 Xylella fastidiosa strain ATCC 35879 contig2, whole genome shotgun sequence
43	58777	58819	AAAAACGGCGTTTCATGCAACCGCGGAAGTACGTGTAGCAGGG	JQAP01000001.1 Xylella fastidiosa strain ATCC 35879 contig1, whole genome shotgun sequence
43	58795	58837	GCTGCGTCAGCGTGGTATTGGCGTGGTGCCGCATGCATTTCCG	JQAP01000002.1 Xylella fastidiosa strain ATCC 35879 contig2, whole genome shotgun sequence
43	58948	58990	CAGCGTGCCGTTGCGAGTTGAATTGCCGACGGTGTTCTGGACT	JQAP01000002.1 Xylella fastidiosa strain ATCC 35879 contig2, whole genome shotgun sequence
43	58998	59040	GGGATCACATCTGTATCCAATACGGACGGTGGCTCGGTAAGTA	JQAP01000016.1 Xylella fastidiosa strain ATCC 35879 contig16, whole genome shotgun sequence
43	59187	59229	CATGGACTCGTTCAAGATACAAACAAAAGCGGTTGCTATGGAT	JQAP01000001.1 Xylella fastidiosa strain ATCC 35879 contig1, whole genome shotgun sequence
43	59451	59493	TGAGCCTGTCACTATTGGGGCATACCACTATGTGGATGGTGGT	JQAP01000001.1 Xylella fastidiosa strain ATCC 35879 contig1, whole genome shotgun sequence
43	59567	59609	TGCTTCGCAACGCCGGGAAAATACGCCATCCAACGATCTACGA	JQAP01000016.1 Xylella fastidiosa strain ATCC 35879 contig16, whole genome shotgun sequence
43	60126	60168	CAGTGGGGGATCCAACGCTAGAGCGCGTGCCAAGCCAGCGCGC	JQAP01000004.1 Xylella fastidiosa strain ATCC 35879 contig4, whole genome shotgun sequence
43	60737	60779	AAGGGCAATGCCAGCGAAGATCGTCATGCCGACCCAGTTGTTA	JQAP01000001.1 Xylella fastidiosa strain ATCC 35879 contig1, whole genome shotgun sequence
43	61224	61266	ACGCTAAGTAATACGGTAAGCCGATTCATCGTGAGCACGAGGC	JQAP01000001.1 Xylella fastidiosa strain ATCC 35879 contig1, whole genome shotgun sequence
43	62058	62100	TACTCCAACCGGTGAAATAGGATATTTGCGTTTTTCGCAATGA	JQAP01000001.1 Xylella fastidiosa strain ATCC 35879 contig1, whole genome shotgun sequence
43	62711	62753	ATACGTAGCGCAGCCTCAACCACAATGGGTTGAATGGGTGGCA	JQAP01000004.1 Xylella fastidiosa strain ATCC 35879 contig4, whole genome shotgun sequence
43	64962	65004	GATCTGCATCTAGAAAAAATGTCGTCGTTATTGGCTAAATGTG	JQAP01000001.1 Xylella fastidiosa strain ATCC 35879 contig1, whole genome shotgun sequence
43	65072	65114	AATTCATAGTGCTATTTCAAGGGATGTTTAGTGGTTGATTATA	JQAP01000001.1 Xylella fastidiosa strain ATCC 35879 contig1, whole genome shotgun sequence
43	65893	65935	TACGTGATCATCTCCTTGAGCCGTATGCTCAAAATGACGCTCT	JQAP01000004.1 Xylella fastidiosa strain ATCC 35879 contig4, whole genome shotgun sequence
43	66214	66256	TGTCGTGAGTGAGTTAGTGCTCCCCTATCTAAATGCTTGATAG	JQAP01000004.1 Xylella fastidiosa strain ATCC 35879 contig4, whole genome shotgun sequence
43	67821	67863	TGAGCCTACGGGAGTTGCAGCACTATAAACGCCTACCGAACGG	JQAP01000012.1 Xylella fastidiosa strain ATCC 35879 contig12, whole genome shotgun sequence
43	68160	68202	GGTTTTAGGAAAGCAATCTGGGAAGGTTGGCCATAGAAGGTGA	JQAP01000001.1 Xylella fastidiosa strain ATCC 35879 contig1, whole genome shotgun sequence
43	68255	68297	CGCTTGGTTGTCGCAGTTGCGGCAGCGGGCTAACTGGCTGGCG	JQAP01000004.1 Xylella fastidiosa strain ATCC 35879 contig4, whole genome shotgun sequence
43	68255	68297	ATTAGATTGTCAAAGAAGTGCAATCTAGCCTCAATATCTTGAA	JQAP01000012.1 Xylella fastidiosa strain ATCC 35879 contig12, whole genome shotgun sequence
43	68651	68693	GACGCCGCTGCATTCAATTGTTCTGCTGTTGACCGATCCGGAT	JQAP01000004.1 Xylella fastidiosa strain ATCC 35879 contig4, whole genome shotgun sequence
43	68789	68831	AGGTGTGAAAATTGGTGATGTTCTTATTACTTCAGGGCTGGGA	JQAP01000004.1 Xylella fastidiosa strain ATCC 35879 contig4, whole genome shotgun sequence
43	68873	68915	ATTGAAACTGAAGCGCCCACGATCTTTATCGCGCAACTGATCG	JQAP01000015.1 Xylella fastidiosa strain ATCC 35879 contig15, whole genome shotgun sequence
43	68950	68992	TACTGTTGTTGCGCTTGGGTGGGTCCATGTCACCTGGTGGTGG	JQAP01000004.1 Xylella fastidiosa strain ATCC 35879 contig4, whole genome shotgun sequence
43	69263	69305	ATGGGTGTACTGGCTGACTTCATTTATGGTGGTTTGTTAGGGG	JQAP01000004.1 Xylella fastidiosa strain ATCC 35879 contig4, whole genome shotgun sequence
43	69502	69544	GTACACTATCGGCACCCAAGAGCTGATCGCCACGCGCCATCAA	JQAP01000015.1 Xylella fastidiosa strain ATCC 35879 contig15, whole genome shotgun sequence
43	69578	69620	GAGCGTGCATCATCCACAAGCAAAGCATACGTATGCCGAAGTT	JQAP01000004.1 Xylella fastidiosa strain ATCC 35879 contig4, whole genome shotgun sequence
43	69588	69630	ACACAACGAATGCAGAGCAACCAATAGGGAACGCTTCTCTACA	JQAP01000012.1 Xylella fastidiosa strain ATCC 35879 contig12, whole genome shotgun sequence
43	70223	70265	AATTATTAATATTTTGAGATGTAGTAAATTGTATGTAAAGTAT	JQAP01000012.1 Xylella fastidiosa strain ATCC 35879 contig12, whole genome shotgun sequence
43	71225	71267	TTTTGCTCTCGTGCAAGCAAGACTTTCATCCCAGCATATGGAG	JQAP01000012.1 Xylella fastidiosa strain ATCC 35879 contig12, whole genome shotgun sequence
43	71418	71460	CCGTCGTGTGCTACGGTTCAATGACCCTCGCCGCTTCGGATGC	JQAP01000001.1 Xylella fastidiosa strain ATCC 35879 contig1, whole genome shotgun sequence
43	71764	71806	CAGCGCCGTGATCGACACCCCAAATGCCTGTGCCGCTTCGCCA	JQAP01000014.1 Xylella fastidiosa strain ATCC 35879 contig14, whole genome shotgun sequence
43	71944	71986	TGGGCGCCAGTGGTTGGACCTTAAGCTATTTTATTTGCAGCCT	JQAP01000004.1 Xylella fastidiosa strain ATCC 35879 contig4, whole genome shotgun sequence
43	72414	72456	GTCAGCGGCGGCAGAGCACCATGCCAGTGGTGAACATTGCGTC	JQAP01000001.1 Xylella fastidiosa strain ATCC 35879 contig1, whole genome shotgun sequence
43	72514	72556	CATGCGCTGCTTGTGGATCGCAGGGCAAGCACGCGATACTTAT	JQAP01000004.1 Xylella fastidiosa strain ATCC 35879 contig4, whole genome shotgun sequence
43	72714	72756	TGCTTCAGTCGGTTTAGCAGCGCCGTTGGTAATTTCGTCGGAC	JQAP01000012.1 Xylella fastidiosa strain ATCC 35879 contig12, whole genome shotgun sequence
43	72752	72794	TACCACCAAAAAATGATAACCCCCGTGAGCTAATAGACCCACC	JQAP01000001.1 Xylella fastidiosa strain ATCC 35879 contig1, whole genome shotgun sequence
43	72803	72845	AATACGCCACTCACCTCTGCGCGAAATATCATTAAATAACAAC	JQAP01000001.1 Xylella fastidiosa strain ATCC 35879 contig1, whole genome shotgun sequence
43	72818	72860	GTTGTGAGTATCACATGAGTGATGTACCTGATGATGGATGACT	JQAP01000012.1 Xylella fastidiosa strain ATCC 35879 contig12, whole genome shotgun sequence
43	73278	73320	GAATCTCAATGTTCCAGCACCTGCGGTCATATTACTTGCCGGA	JQAP01000001.1 Xylella fastidiosa strain ATCC 35879 contig1, whole genome shotgun sequence
43	73737	73779	CAACGATCTCTATTTATACGTTTCAGTCGGTGTACGCTGGTGG	JQAP01000002.1 Xylella fastidiosa strain ATCC 35879 contig2, whole genome shotgun sequence
43	74152	74194	CAGAAGGAGCGTCGTAATCCGACTCTACTTAACGGCTCGCGCC	JQAP01000001.1 Xylella fastidiosa strain ATCC 35879 contig1, whole genome shotgun sequence
43	74349	74391	GAATGAGGGATGTACGAGCACCACATGATTTGATTGACTGTGT	JQAP01000004.1 Xylella fastidiosa strain ATCC 35879 contig4, whole genome shotgun sequence
43	74390	74432	TCCTTTTATACCATTCTCGTATTTGATTGGATGCAGGGGTTGC	JQAP01000001.1 Xylella fastidiosa strain ATCC 35879 contig1, whole genome shotgun sequence
43	74429	74471	CTCCATAAGCTGTAGGTGGATCTGTGGATATAGCACGTCGTGA	JQAP01000002.1 Xylella fastidiosa strain ATCC 35879 contig2, whole genome shotgun sequence
43	74522	74564	GGTCAGACTGATTTTGATCGCTCGCTTTCCCAACAAGGCATGA	JQAP01000002.1 Xylella fastidiosa strain ATCC 35879 contig2, whole genome shotgun sequence
43	75298	75340	AAGGAGGCAAAATTAGTGGGAGTTTGACAATTCGTGGTATCAG	JQAP01000002.1 Xylella fastidiosa strain ATCC 35879 contig2, whole genome shotgun sequence
43	75375	75417	AGGTACTGTCCCCGCTGGTGCTTATCACTCCATCCCATAGCCC	JQAP01000012.1 Xylella fastidiosa strain ATCC 35879 contig12, whole genome shotgun sequence
43	75462	75504	CTTGGCAATCGGGTGACCTTCCGTTGGCATGGCCGTTTGATCG	JQAP01000002.1 Xylella fastidiosa strain ATCC 35879 contig2, whole genome shotgun sequence
43	75511	75553	AAGCAGCTACGTCACAGCATTACATCGGATTGATGCACTGATG	JQAP01000012.1 Xylella fastidiosa strain ATCC 35879 contig12, whole genome shotgun sequence
43	76229	76271	CGTGAAGGTTGCCGTTCCTTTTGCTGCACCTGGGCCTACTTTT	JQAP01000001.1 Xylella fastidiosa strain ATCC 35879 contig1, whole genome shotgun sequence
43	77797	77839	ATATGTGGCGCATGCTGGGCGTCAGGCGGCTGAATTCCATTTC	JQAP01000004.1 Xylella fastidiosa strain ATCC 35879 contig4, whole genome shotgun sequence
43	78113	78155	CAGAGGGCTGCACAACGCCTGTTAGTGGCGATGCGTGCCTGTT	JQAP01000004.1 Xylella fastidiosa strain ATCC 35879 contig4, whole genome shotgun sequence
43	78241	78283	GTTGCTGGGGGCCAGAAAGCGTCTGGCACAGCGTTGGATTGCG	JQAP01000004.1 Xylella fastidiosa strain ATCC 35879 contig4, whole genome shotgun sequence
43	78689	78731	CTGCGTTCCATGCGATGAAATTTTTATTTTTTCCATATCTGTT	JQAP01000004.1 Xylella fastidiosa strain ATCC 35879 contig4, whole genome shotgun sequence
43	79634	79676	TGTTGTTGTAATTGGTAAGTGCTCTTGAAATACAAATGGTAGG	JQAP01000012.1 Xylella fastidiosa strain ATCC 35879 contig12, whole genome shotgun sequence
43	80511	80553	ACCGACACTGGAAAAACGCTTAGCAATGGTGCCGGCGGACTCA	JQAP01000015.1 Xylella fastidiosa strain ATCC 35879 contig15, whole genome shotgun sequence
43	80845	80887	AACGGCAACTAATACCCGCTTACACACCGACCCAAGCACCACT	JQAP01000015.1 Xylella fastidiosa strain ATCC 35879 contig15, whole genome shotgun sequence
43	81325	81367	TCTCCGCCTAGTTGGGTGTGCAGATATGGCGTTGCAGGCCTAC	JQAP01000004.1 Xylella fastidiosa strain ATCC 35879 contig4, whole genome shotgun sequence
43	81492	81534	CTGCCGAAGACAAAATCAGCTCCATGAAGCACGGATATCAACC	JQAP01000012.1 Xylella fastidiosa strain ATCC 35879 contig12, whole genome shotgun sequence
43	81587	81629	GTGTACGTCGGCATAAAATGCTCGTCCGACGCCACCCCCACGA	JQAP01000004.1 Xylella fastidiosa strain ATCC 35879 contig4, whole genome shotgun sequence
43	82767	82809	GCCGCCGCACGCACTTCAGCAACACGCCTGGCCTGATCCGAAA	JQAP01000015.1 Xylella fastidiosa strain ATCC 35879 contig15, whole genome shotgun sequence
43	84497	84539	TGGGTAAGTGCAGTTGTGTTTTTTTATGTTGCAGGATTGTGAG	JQAP01000002.1 Xylella fastidiosa strain ATCC 35879 contig2, whole genome shotgun sequence
43	85099	85141	GACCAAGCGTTCACTATGCTCAACAGCATCGAAATGCACGTTA	JQAP01000012.1 Xylella fastidiosa strain ATCC 35879 contig12, whole genome shotgun sequence
43	85186	85228	AGTCAGCTCAAAATAATGCGTGGCAAACAGCGTATAACAACGG	JQAP01000012.1 Xylella fastidiosa strain ATCC 35879 contig12, whole genome shotgun sequence
43	87208	87250	GGAACTACCCCGCTGAGTCAAAGTGATATCGAGTAACCGCGCT	JQAP01000012.1 Xylella fastidiosa strain ATCC 35879 contig12, whole genome shotgun sequence
43	87577	87619	TTGGCGTGTTTTCTATCAGATTGCCATGTCTTATACAAAGCAT	JQAP01000012.1 Xylella fastidiosa strain ATCC 35879 contig12, whole genome shotgun sequence
43	88294	88336	CTGATCCTCAGCGGCAACCAACGAGATGGGTACACTTGGTGCA	JQAP01000012.1 Xylella fastidiosa strain ATCC 35879 contig12, whole genome shotgun sequence
43	88468	88510	CACACTCATTAACGCTGACACTAGCGACACTATGAGCAGACGA	JQAP01000012.1 Xylella fastidiosa strain ATCC 35879 contig12, whole genome shotgun sequence
43	89083	89125	CGACCCGATGGGCAATCTGTCCCGCATCCATCTGGTGACGTTT	JQAP01000004.1 Xylella fastidiosa strain ATCC 35879 contig4, whole genome shotgun sequence
43	89118	89160	CGCCAATCAGGATCTTACTGGGAGCCGAAGGAAAGCGGGCGGC	JQAP01000012.1 Xylella fastidiosa strain ATCC 35879 contig12, whole genome shotgun sequence
43	89422	89464	CCAAGCGGCAGGTAAGCACCTCTTGCGTTTGGTCAATGATGCC	JQAP01000004.1 Xylella fastidiosa strain ATCC 35879 contig4, whole genome shotgun sequence
43	89656	89698	CTCAATGAAAAACTTGACTCACCTACTCCTTGCACTGATAGCC	JQAP01000012.1 Xylella fastidiosa strain ATCC 35879 contig12, whole genome shotgun sequence
43	89733	89775	CAACGGTCCCCTCTCACTCTACTAACAGCGCAGTACTGCCAAT	JQAP01000012.1 Xylella fastidiosa strain ATCC 35879 contig12, whole genome shotgun sequence
43	89922	89964	GTAACAATGGCACTGGAATCAACATGGTCGGTTTGAGTATGCA	JQAP01000012.1 Xylella fastidiosa strain ATCC 35879 contig12, whole genome shotgun sequence
43	92569	92611	TGTCGTAATTGACGGATGTAGCCATCTGATCCGACTCCATGGA	JQAP01000001.1 Xylella fastidiosa strain ATCC 35879 contig1, whole genome shotgun sequence
43	94176	94218	TTGAATGCCATGGCCTTAATGCGTGCGTATTCTTTGCTGCTTC	JQAP01000004.1 Xylella fastidiosa strain ATCC 35879 contig4, whole genome shotgun sequence
43	94235	94277	GCAGGCCAGTGTCCATGGGCTTCCGGAGAAACCAATGAGCGGG	JQAP01000004.1 Xylella fastidiosa strain ATCC 35879 contig4, whole genome shotgun sequence
43	95195	95237	GAGCATTTCAGGTGTTAGACCTGAGGGCAGGACAGTGGGCAAG	JQAP01000004.1 Xylella fastidiosa strain ATCC 35879 contig4, whole genome shotgun sequence
43	96301	96343	TGTGGCGTAGAGATCGCTCAGTACCTGTTTGCGGTCGATTTGT	JQAP01000004.1 Xylella fastidiosa strain ATCC 35879 contig4, whole genome shotgun sequence
43	97107	97149	AACATCTTTTGCCAACATCGTGCGTGGTTATGTAGATACGAGA	JQAP01000001.1 Xylella fastidiosa strain ATCC 35879 contig1, whole genome shotgun sequence
43	97658	97700	CATCACCTTGGATATTGGCCGTAAATCATTGCTGACACTACGT	JQAP01000001.1 Xylella fastidiosa strain ATCC 35879 contig1, whole genome shotgun sequence
43	98238	98280	GCAGAATGGCGTCAGGATTTCGTTGGCGTCAAATGCAACCATG	JQAP01000014.1 Xylella fastidiosa strain ATCC 35879 contig14, whole genome shotgun sequence
43	98944	98986	TGGTTGGAAGGCCGAATTGCTTGAAGTTTCTGGCGGTGAAGTG	JQAP01000002.1 Xylella fastidiosa strain ATCC 35879 contig2, whole genome shotgun sequence
43	99259	99301	GTGCGTTCCAATGGAAGCCTAACCAAGAGACGTCTTCCTGGAT	JQAP01000004.1 Xylella fastidiosa strain ATCC 35879 contig4, whole genome shotgun sequence
43	99669	99711	TCTTGGGTGTGAATGGTGTGTTGTGTTTGGTGTCTGGGTGATA	JQAP01000004.1 Xylella fastidiosa strain ATCC 35879 contig4, whole genome shotgun sequence
43	100181	100223	GCTGTCGGTCAAGGTGAATGTTTTGCGACTTTTGACGAAGGCG	JQAP01000002.1 Xylella fastidiosa strain ATCC 35879 contig2, whole genome shotgun sequence
43	101945	101987	GCGTTTTCATAAGGTTGAAGGGCTGGCATACGAACACGGTTGG	JQAP01000001.1 Xylella fastidiosa strain ATCC 35879 contig1, whole genome shotgun sequence
43	102213	102255	CGGCAGCAATTTATCCAACGACTTTCCATCTTGGATGGACTGT	JQAP01000015.1 Xylella fastidiosa strain ATCC 35879 contig15, whole genome shotgun sequence
43	103585	103627	AAGCGGTACTGAATGAAAAAAACGTCTCCACCTTCCATCGGGC	JQAP01000015.1 Xylella fastidiosa strain ATCC 35879 contig15, whole genome shotgun sequence
43	103631	103673	ATGGCTCGATAGGCTGGATCATCAGCTGCGCTCCCATCTGCCA	JQAP01000015.1 Xylella fastidiosa strain ATCC 35879 contig15, whole genome shotgun sequence
43	104403	104445	CGCATTGTCCATTGAACCGCCAAGTCCAAGGTTACGCTCACGC	JQAP01000015.1 Xylella fastidiosa strain ATCC 35879 contig15, whole genome shotgun sequence
43	104457	104499	GTCATGCATAAAACCAAAAGTACGCGCCAGAGAAATTTCCTTG	JQAP01000015.1 Xylella fastidiosa strain ATCC 35879 contig15, whole genome shotgun sequence
43	104483	104525	CGCTGAAACCAACCAGTGGCAGGAGGTGCGGGAAGAAGCGCAT	JQAP01000002.1 Xylella fastidiosa strain ATCC 35879 contig2, whole genome shotgun sequence
43	104709	104751	GAATACAAACGGCGCAGAAGACCCATCCATAATCGGTAACTCA	JQAP01000015.1 Xylella fastidiosa strain ATCC 35879 contig15, whole genome shotgun sequence
43	104925	104967	CCGGAACACGATACCGTGGTTGACCGGAGCAGGACGGAGGGTA	JQAP01000015.1 Xylella fastidiosa strain ATCC 35879 contig15, whole genome shotgun sequence
43	105327	105369	TTTATTCATGCCATATTTGAGAAATCATGCTCATATTAATATT	JQAP01000014.1 Xylella fastidiosa strain ATCC 35879 contig14, whole genome shotgun sequence
43	105704	105746	CGTCGCAACCACAGTAACGCGTACTTCATCCTGCATCTCAGGA	JQAP01000015.1 Xylella fastidiosa strain ATCC 35879 contig15, whole genome shotgun sequence
43	105878	105920	AGCCAAATTAACGTCATCCAGAAGCGGATTCTGAACTGCCGCC	JQAP01000015.1 Xylella fastidiosa strain ATCC 35879 contig15, whole genome shotgun sequence
43	106124	106166	GCCAAGCACGGTGATTAGCTTTTCATTGGGTATAGTAATCAGA	JQAP01000015.1 Xylella fastidiosa strain ATCC 35879 contig15, whole genome shotgun sequence
43	106737	106779	ATCTGACAGTCGTTTGAGGAGTGGCCAGGGGATGTGCCCTACC	JQAP01000004.1 Xylella fastidiosa strain ATCC 35879 contig4, whole genome shotgun sequence
43	106772	106814	TATCCATGCCCTTGCTATTACACTTGCGAAAAAACCGGCTTTT	JQAP01000015.1 Xylella fastidiosa strain ATCC 35879 contig15, whole genome shotgun sequence
43	107861	107903	AGTTGCTTCGCGTATCGAATCTCTGTCCACTGAGTATGCCAAG	JQAP01000004.1 Xylella fastidiosa strain ATCC 35879 contig4, whole genome shotgun sequence
43	110658	110700	GTGATCTGCGTTGGTTCAACCAGCGTGATGGCTGGCACGTGCG	JQAP01000002.1 Xylella fastidiosa strain ATCC 35879 contig2, whole genome shotgun sequence
43	111256	111298	CTACGTGGAGCGAGGTCGCCACTTTGCTATTTTGGCGGGGTTC	JQAP01000002.1 Xylella fastidiosa strain ATCC 35879 contig2, whole genome shotgun sequence
43	111873	111915	ATACCTATGCCATGGATGCGTTTTGAAGCGATTGGGTTGCTAT	JQAP01000002.1 Xylella fastidiosa strain ATCC 35879 contig2, whole genome shotgun sequence
43	112364	112406	GCGATCTATTCATGTTGTGGCAGCTGTGATTGCTGATGTGCGA	JQAP01000002.1 Xylella fastidiosa strain ATCC 35879 contig2, whole genome shotgun sequence
43	112872	112914	CGTTGGTCGGGGTTGGTGCGCCAAGCAGTGCAACGTCGTGGCC	JQAP01000002.1 Xylella fastidiosa strain ATCC 35879 contig2, whole genome shotgun sequence
43	113368	113410	GATCCTTTGCAGTTGGCGGCGCGGTCTACCCCAATCGTGTAAA	JQAP01000001.1 Xylella fastidiosa strain ATCC 35879 contig1, whole genome shotgun sequence
43	113446	113488	CAGCGATTAGCCGCTCACATAGTGCGGTCACGACGTCGGCACC	JQAP01000002.1 Xylella fastidiosa strain ATCC 35879 contig2, whole genome shotgun sequence
43	113666	113708	GTGGAAATAGGCGTCTGGGTTGTAAAAGTATTGAGTGATTGCC	JQAP01000002.1 Xylella fastidiosa strain ATCC 35879 contig2, whole genome shotgun sequence
43	114471	114513	AAATAACGGATGTCATCCATAGGTCATGTGTTGTAGTTGAAAG	JQAP01000001.1 Xylella fastidiosa strain ATCC 35879 contig1, whole genome shotgun sequence
43	114897	114939	GCTGAGCCAAGCAGCTGCGATACAGCCACGCCCTTGGGGTCCG	JQAP01000004.1 Xylella fastidiosa strain ATCC 35879 contig4, whole genome shotgun sequence
43	115008	115050	GGCGCGTAATGGAGCGATGTCGCCATCCATGCTAAAGATGCCA	JQAP01000004.1 Xylella fastidiosa strain ATCC 35879 contig4, whole genome shotgun sequence
43	115056	115098	TGCTAGCATTGCTGCACCTTCGGGTGCGTTCTTGAGTTGATGT	JQAP01000004.1 Xylella fastidiosa strain ATCC 35879 contig4, whole genome shotgun sequence
43	115140	115182	GCAGCCTGCCAGACGGGTAGCATCTATCAGGCTGGCATGGTTG	JQAP01000004.1 Xylella fastidiosa strain ATCC 35879 contig4, whole genome shotgun sequence
43	115182	115224	ACCCCCTCCAAACCAAGCTCGAGCATATCGCCAAGCACCAACC	JQAP01000015.1 Xylella fastidiosa strain ATCC 35879 contig15, whole genome shotgun sequence
43	115675	115717	AGCTTGGTGGTCTGTGGATGTGAGTGGTGCGTTATTTCGGGGA	JQAP01000004.1 Xylella fastidiosa strain ATCC 35879 contig4, whole genome shotgun sequence
43	115887	115929	ACGCGGCATGGACACCGGCTTAAAAGCGATCCATCCGATTACC	JQAP01000014.1 Xylella fastidiosa strain ATCC 35879 contig14, whole genome shotgun sequence
43	115959	116001	CTTCGTACTCATGGCTTACGGTACCGGCGCGGTGATGGCTGTC	JQAP01000014.1 Xylella fastidiosa strain ATCC 35879 contig14, whole genome shotgun sequence
43	116015	116057	CTGCCAGATATTTGTCCTGATTATTGCATCAGCTTTGGAAGGA	JQAP01000004.1 Xylella fastidiosa strain ATCC 35879 contig4, whole genome shotgun sequence
43	117333	117375	GGATCTGACCAAGCCCAAGGTAGTGGCATTGATTGTGTTCACG	JQAP01000004.1 Xylella fastidiosa strain ATCC 35879 contig4, whole genome shotgun sequence
43	117357	117399	CGAAACACTGCTAGAAGATCTACCATTCCCTAAAGTTGACACC	JQAP01000014.1 Xylella fastidiosa strain ATCC 35879 contig14, whole genome shotgun sequence
43	117891	117933	CGTGCGGCGTGGCCTCCATGCCTCAGGCGTCGTCATCGTTGAC	JQAP01000014.1 Xylella fastidiosa strain ATCC 35879 contig14, whole genome shotgun sequence
43	118039	118081	CGCTACGCGGCAATTTTCACTATGATTGATGGCAATGGAGAAG	JQAP01000014.1 Xylella fastidiosa strain ATCC 35879 contig14, whole genome shotgun sequence
43	118092	118134	TCCACCTGATGAATTATTTGCAATGAAAACGTTTGGTTATTCG	JQAP01000004.1 Xylella fastidiosa strain ATCC 35879 contig4, whole genome shotgun sequence
43	118203	118245	CTCAATCCTGCGTCGTATCGATAGCGTCATCCGTTCACGTCTT	JQAP01000014.1 Xylella fastidiosa strain ATCC 35879 contig14, whole genome shotgun sequence
43	118289	118331	CAACCTCCGGCGCCTGATCAAGGCATCATGGAACTTCGCCCAG	JQAP01000014.1 Xylella fastidiosa strain ATCC 35879 contig14, whole genome shotgun sequence
43	118466	118508	ATGGTGCTGGCCATGTGCGGGTTTGGGCGCAACTTCATCGCCA	JQAP01000002.1 Xylella fastidiosa strain ATCC 35879 contig2, whole genome shotgun sequence
43	119223	119265	GGCTGTGCAGTTGGATGATGTTGCGGTGCCAGTGGCCAAGCGC	JQAP01000002.1 Xylella fastidiosa strain ATCC 35879 contig2, whole genome shotgun sequence
43	119289	119331	CCTTCCGCGCCGTTGGTTCCAAGCAACGATCCGACCTTGCTGT	JQAP01000001.1 Xylella fastidiosa strain ATCC 35879 contig1, whole genome shotgun sequence
43	119546	119588	GGCCTGGGAGTTGCTGACCCAGGTTTGGGAGTTGCCCCCCGAA	JQAP01000001.1 Xylella fastidiosa strain ATCC 35879 contig1, whole genome shotgun sequence
43	119819	119861	AGATGGAGATCGTTTCATTGAAATATGGAATTTGGTGTTCATG	JQAP01000001.1 Xylella fastidiosa strain ATCC 35879 contig1, whole genome shotgun sequence
43	120350	120392	GCAGCAGTTCGTATACGGTATTGTCATGCAACTTTGACAGACG	JQAP01000004.1 Xylella fastidiosa strain ATCC 35879 contig4, whole genome shotgun sequence
43	120567	120609	TGCGAAGCCGATCAGCATATCCCCTGGTGCCAGCTTTGCAGCT	JQAP01000004.1 Xylella fastidiosa strain ATCC 35879 contig4, whole genome shotgun sequence
43	120606	120648	GATCCCTATCGCTACCAACGCAGCCGGCCACCACGTGGCAATC	JQAP01000014.1 Xylella fastidiosa strain ATCC 35879 contig14, whole genome shotgun sequence
43	120893	120935	CCAAATCAGCCAGGCGACGCTACCCAGCCACGTCGCAATACCA	JQAP01000014.1 Xylella fastidiosa strain ATCC 35879 contig14, whole genome shotgun sequence
43	121102	121144	GACATCAACGCGCGCACGTTCTACTATCCACCTTGCCGTCGCC	JQAP01000014.1 Xylella fastidiosa strain ATCC 35879 contig14, whole genome shotgun sequence
43	123080	123122	CAAAATCACCGGCGGCAAACCAACACAGACCGCCAACATTTGC	JQAP01000014.1 Xylella fastidiosa strain ATCC 35879 contig14, whole genome shotgun sequence
43	124012	124054	CATTCGATAGCTTTCCGTTGAAGATAATTATCCTCGTGCCGCT	JQAP01000004.1 Xylella fastidiosa strain ATCC 35879 contig4, whole genome shotgun sequence
43	124572	124614	GGCCCAAGGCTGCAACAATACCGCGGCGAACAACACAGCCGAC	JQAP01000014.1 Xylella fastidiosa strain ATCC 35879 contig14, whole genome shotgun sequence
43	124838	124880	CGCCGCTTCGCTCAGGTTGACGTCGAATTTTGCGATGACTGTG	JQAP01000004.1 Xylella fastidiosa strain ATCC 35879 contig4, whole genome shotgun sequence
43	124990	125032	CAGAGTGATTTCCTTGGTGAGTTTTTGCAGGTCCGTGGGGATT	JQAP01000004.1 Xylella fastidiosa strain ATCC 35879 contig4, whole genome shotgun sequence
43	125111	125153	CGCAAATACTATCTCATCTCACCAAAACCACTCACACCAACAC	JQAP01000014.1 Xylella fastidiosa strain ATCC 35879 contig14, whole genome shotgun sequence
43	128288	128330	AACGGCACCACGCCAGCCGGCCACTGGACTGGATTGTTCCGCC	JQAP01000001.1 Xylella fastidiosa strain ATCC 35879 contig1, whole genome shotgun sequence
43	128796	128838	CGGCGGACAGAACAGCGCCGCAGCATCCTGCCAGCGAACAGAA	JQAP01000001.1 Xylella fastidiosa strain ATCC 35879 contig1, whole genome shotgun sequence
43	132637	132679	CGACAGTCATCTCAAGGGTGGTACCGGCCAGACGTTCGATTGG	JQAP01000004.1 Xylella fastidiosa strain ATCC 35879 contig4, whole genome shotgun sequence
43	134153	134195	TGCTTTGAAACCACGGATTGTGTCTTTTAATGGGACGTATTTA	JQAP01000002.1 Xylella fastidiosa strain ATCC 35879 contig2, whole genome shotgun sequence
43	136052	136094	GGGAATCGTCGGAAATGAATGACAACAACATCCAAGTAGATGA	JQAP01000015.1 Xylella fastidiosa strain ATCC 35879 contig15, whole genome shotgun sequence
43	140031	140073	GAAGTCAGCAGGGATCACCTTTATGAGGTTCATCAAAAATATC	JQAP01000002.1 Xylella fastidiosa strain ATCC 35879 contig2, whole genome shotgun sequence
43	145012	145054	CGGTAAAAATTACCATCCTGTCGTTATTAATGAAAATATGGTC	JQAP01000002.1 Xylella fastidiosa strain ATCC 35879 contig2, whole genome shotgun sequence
43	145223	145265	ACAGCACTTTCATGCTGAGGGATTGGCGGCTTACACCCTCGGG	JQAP01000001.1 Xylella fastidiosa strain ATCC 35879 contig1, whole genome shotgun sequence
43	145405	145447	TGCCAAGGGGCGTAGTTCTCGTATTGTTAAACGTAGTAGTCAT	JQAP01000002.1 Xylella fastidiosa strain ATCC 35879 contig2, whole genome shotgun sequence
43	145508	145550	GTTCATCCGATTGGAATTCGTTTGGGTATATCTGCAGATTGGA	JQAP01000002.1 Xylella fastidiosa strain ATCC 35879 contig2, whole genome shotgun sequence
43	145924	145966	CTTGGGTGCTTTAGGGATAAAAATTAGTGTTGCTGGACGTCTT	JQAP01000002.1 Xylella fastidiosa strain ATCC 35879 contig2, whole genome shotgun sequence
43	146203	146245	TGAGGTGAGGTGACGTTAATGCTACAGCCAAAGCGAACAAAAT	JQAP01000002.1 Xylella fastidiosa strain ATCC 35879 contig2, whole genome shotgun sequence
43	147211	147253	CGTTATGCAAGTATTGGTGACGTTATTAAAGTCACTGTGAAAG	JQAP01000002.1 Xylella fastidiosa strain ATCC 35879 contig2, whole genome shotgun sequence
43	147268	147310	TATTCGGTCACCGTTGGATGTAGGTACTTCCTTGCCAGGTAGC	JQAP01000001.1 Xylella fastidiosa strain ATCC 35879 contig1, whole genome shotgun sequence
43	147456	147498	GAAGATAGTCTCTCTCGCCCCTGAAGTACTGTGAGTGGATGAT	JQAP01000002.1 Xylella fastidiosa strain ATCC 35879 contig2, whole genome shotgun sequence
43	147519	147561	TAAGAAGGGTGACCAAGTAATTGTTATCGCTGGTAAAGACAAA	JQAP01000002.1 Xylella fastidiosa strain ATCC 35879 contig2, whole genome shotgun sequence
43	147691	147733	CCTATCCATGTTTCAAACATTAAAATTTTAAATCCGATGACTG	JQAP01000002.1 Xylella fastidiosa strain ATCC 35879 contig2, whole genome shotgun sequence
43	148094	148136	CAAGACTACTTTGCGTCGCTCTAAGATGTATGAATTCTTAGAT	JQAP01000002.1 Xylella fastidiosa strain ATCC 35879 contig2, whole genome shotgun sequence
43	148120	148162	ACTCAAGAACAGAATGTGCGCATCCATGCCACCGATACGCAAG	JQAP01000015.1 Xylella fastidiosa strain ATCC 35879 contig15, whole genome shotgun sequence
43	148169	148211	TGATTTCCGTGGTATTCCTCCACGTTCCTTTGATGGTCGTGGT	JQAP01000002.1 Xylella fastidiosa strain ATCC 35879 contig2, whole genome shotgun sequence
43	148395	148437	AAAAATTTCCATGATTAATCGTGACCTTAAACGGAAAAGGTTG	JQAP01000002.1 Xylella fastidiosa strain ATCC 35879 contig2, whole genome shotgun sequence
43	148611	148653	CTGTAAATTTGGTTTAGGTCGCAATAAACTTAGGGAGGCAGCT	JQAP01000002.1 Xylella fastidiosa strain ATCC 35879 contig2, whole genome shotgun sequence
43	149118	149160	TGTGGTAAGGCCGAGCTTCCTGAAGTATTGGGTGGCTTGGGTG	JQAP01000002.1 Xylella fastidiosa strain ATCC 35879 contig2, whole genome shotgun sequence
43	149686	149728	AAGTTGCTGCTAAGATTCGTAATTTTCGGCCGCCTGAGCCCTA	JQAP01000002.1 Xylella fastidiosa strain ATCC 35879 contig2, whole genome shotgun sequence
43	150370	150412	TGCGCAGCAGTTTGTCACGCCACTTAGTTTCCAGGCATTGTCT	JQAP01000001.1 Xylella fastidiosa strain ATCC 35879 contig1, whole genome shotgun sequence
43	151143	151185	AATGTCTCTTCGTCTAAATGACTTAAAGCCCGCCTTGGGTGCT	JQAP01000002.1 Xylella fastidiosa strain ATCC 35879 contig2, whole genome shotgun sequence
43	151540	151582	GGTGCTAGGGCTATGATTGAAGCTACTGGTGGTAGCTTCCAGG	JQAP01000002.1 Xylella fastidiosa strain ATCC 35879 contig2, whole genome shotgun sequence
43	151702	151744	CTGTTACGTTCCGGTTCCTGGCGTAAATCCTGAGGCCATGCTC	JQAP01000002.1 Xylella fastidiosa strain ATCC 35879 contig2, whole genome shotgun sequence
43	152407	152449	TAATATGGCAGGTGTTATTCCCCCTATTTTCGCCTCTAGTATT	JQAP01000002.1 Xylella fastidiosa strain ATCC 35879 contig2, whole genome shotgun sequence
43	152899	152941	TGATGGTGTGAGTTTTTTTAATAAAGCTAATTTGAAAGGTGTT	JQAP01000002.1 Xylella fastidiosa strain ATCC 35879 contig2, whole genome shotgun sequence
43	153387	153429	TTGTCTTCCTTTGCGTGGGCAACGAACTAGAACTAATGCTCGT	JQAP01000002.1 Xylella fastidiosa strain ATCC 35879 contig2, whole genome shotgun sequence
43	153463	153505	TAGAGAGATCCTAAGAAAATGTCTAAACAGTCTGTTGTCAAAA	JQAP01000002.1 Xylella fastidiosa strain ATCC 35879 contig2, whole genome shotgun sequence
43	153561	153603	TTTCAATAATACTATTGTTACAATTACTGACCGACAGGGTAAT	JQAP01000002.1 Xylella fastidiosa strain ATCC 35879 contig2, whole genome shotgun sequence
43	154607	154649	TCCGCAGATCGAACGTCTTACAGAAAACCGTGCCAAGGTTGTA	JQAP01000002.1 Xylella fastidiosa strain ATCC 35879 contig2, whole genome shotgun sequence
43	154664	154706	TCGCGGGTATGCTCATACATTAGGTAATGCATTGCGTCGTGTC	JQAP01000002.1 Xylella fastidiosa strain ATCC 35879 contig2, whole genome shotgun sequence
43	155180	155222	CGAAACAAATGGTACGATAGACGCTGAAGAAGCTCTTCGTACT	JQAP01000002.1 Xylella fastidiosa strain ATCC 35879 contig2, whole genome shotgun sequence
43	155615	155657	TAAAGTCATCCTCGTCGGTAATCTCGGTAACGATCCGGATATC	JQAP01000004.1 Xylella fastidiosa strain ATCC 35879 contig4, whole genome shotgun sequence
43	155813	155855	TTACACGCAACTGGGCACAGATGAGCCAGTCGTCACCGCAGTC	JQAP01000014.1 Xylella fastidiosa strain ATCC 35879 contig14, whole genome shotgun sequence
43	155816	155858	AAGGCTAAGGAGCTTCGTCGTTTCGCTGAGCCTTTGATAACTT	JQAP01000002.1 Xylella fastidiosa strain ATCC 35879 contig2, whole genome shotgun sequence
43	155992	156034	GAAATGTGGTTTTCGTCATGGTGATAATGCACCCATGGCTTAT	JQAP01000002.1 Xylella fastidiosa strain ATCC 35879 contig2, whole genome shotgun sequence
43	155994	156036	GATTACGCCCCACGTCGCCAGACCCGTCAGCCGTCACAGTCGC	JQAP01000004.1 Xylella fastidiosa strain ATCC 35879 contig4, whole genome shotgun sequence
43	157050	157092	ACGTGAGGAATTTGAGATTCAGCGTGTAATTCTTTTAAGTACC	JQAP01000002.1 Xylella fastidiosa strain ATCC 35879 contig2, whole genome shotgun sequence
43	157774	157816	CACTTGGAAGGTATTAATAGAAAAATGGTCGGGGTAGCCGGAT	JQAP01000015.1 Xylella fastidiosa strain ATCC 35879 contig15, whole genome shotgun sequence
43	158179	158221	ATCGTGGCGCTGGTAGTAACGACGGTTGCCACGGCGTTTGGCT	JQAP01000015.1 Xylella fastidiosa strain ATCC 35879 contig15, whole genome shotgun sequence
43	158185	158227	TCCTGCCCGTTTTCAGTTAGTAGCTGCTATGAATCCTTGCCCT	JQAP01000002.1 Xylella fastidiosa strain ATCC 35879 contig2, whole genome shotgun sequence
43	158264	158306	TGCTGTTTGACGTCGCACAAATCAGCAACTTCACCAATGGAGA	JQAP01000015.1 Xylella fastidiosa strain ATCC 35879 contig15, whole genome shotgun sequence
43	158441	158483	GGTTTTTGGATTGCGGCCAGGTCTCTGATTTTTACAGCGCAAT	JQAP01000015.1 Xylella fastidiosa strain ATCC 35879 contig15, whole genome shotgun sequence
43	158689	158731	CATTGCTTAAGCATTCGCCAAACTATGTAGATGGATTGACTAT	JQAP01000002.1 Xylella fastidiosa strain ATCC 35879 contig2, whole genome shotgun sequence
43	159503	159545	GAAGGCGTAGTTGATGGTTTCTTGTAATTCACGTGCAATCAAT	JQAP01000015.1 Xylella fastidiosa strain ATCC 35879 contig15, whole genome shotgun sequence
43	160318	160360	GCAGCGTAATAAGTATTAAATTCCTTCTGAAAGATGATAATTT	JQAP01000002.1 Xylella fastidiosa strain ATCC 35879 contig2, whole genome shotgun sequence
43	161792	161834	CGGGTGACTGGATGCAAGCCTGCTCGTTCACCTCGGCGCCCTG	JQAP01000015.1 Xylella fastidiosa strain ATCC 35879 contig15, whole genome shotgun sequence
43	162292	162334	ACCACCAAATTGCGGGGTACGTAATTGGAATCCGCGAATGTTG	JQAP01000014.1 Xylella fastidiosa strain ATCC 35879 contig14, whole genome shotgun sequence
43	162398	162440	CAGTCGATTTATCTCTACCGCAAATGTCAAATAATCTATTAAA	JQAP01000002.1 Xylella fastidiosa strain ATCC 35879 contig2, whole genome shotgun sequence
43	164244	164286	ACATACTCTGCGCCGAGACGAGCTGGCATCATGAAATCAACCT	JQAP01000015.1 Xylella fastidiosa strain ATCC 35879 contig15, whole genome shotgun sequence
43	164723	164765	AACATGGCCAGGACAATTCATAGGTTTAACGGCGTAGGTACGC	JQAP01000015.1 Xylella fastidiosa strain ATCC 35879 contig15, whole genome shotgun sequence
43	165152	165194	AGCCTTCAAGAAACGCGTATTAGGCACGTGCGGGCCACGGCAC	JQAP01000015.1 Xylella fastidiosa strain ATCC 35879 contig15, whole genome shotgun sequence
43	165197	165239	ATCTACATATTCTTGATGATGATAAATCCCCATCGCAGTAACT	JQAP01000015.1 Xylella fastidiosa strain ATCC 35879 contig15, whole genome shotgun sequence
43	165413	165455	GGAGTAAATATCGTAGTAAAAACCATCAGCAATCACTGGACCA	JQAP01000015.1 Xylella fastidiosa strain ATCC 35879 contig15, whole genome shotgun sequence
43	165573	165615	GTAGTCATGAGGGAGCAGATGGTAACGATGGAGCGGAGATGTC	JQAP01000002.1 Xylella fastidiosa strain ATCC 35879 contig2, whole genome shotgun sequence
43	165654	165696	TGCATCTTGAGGTGGTATAGGTCGTATCGCCAATCCAGCGTAC	JQAP01000002.1 Xylella fastidiosa strain ATCC 35879 contig2, whole genome shotgun sequence
43	165715	165757	TTGTGCTTATGGTTGATCATCAGTGGTTGTGGAACTGTATGTT	JQAP01000002.1 Xylella fastidiosa strain ATCC 35879 contig2, whole genome shotgun sequence
43	166152	166194	CAGTAATGCCAAATTCCTAGGTATTACCTCGAATTTAGCCAAA	JQAP01000015.1 Xylella fastidiosa strain ATCC 35879 contig15, whole genome shotgun sequence
43	166510	166552	ACTTGGCGTGTTTTTTATACCTAAGTCAAGTTTGTACCAGTAA	JQAP01000002.1 Xylella fastidiosa strain ATCC 35879 contig2, whole genome shotgun sequence
43	166617	166659	GGTAATCTATATCTTCTATGCCTGTCCCTGTCTTCCTGCAATC	JQAP01000015.1 Xylella fastidiosa strain ATCC 35879 contig15, whole genome shotgun sequence
43	167176	167218	ACATTCCACACCATAGCAAATAATCTTTTATCAGCTGTAACGT	JQAP01000015.1 Xylella fastidiosa strain ATCC 35879 contig15, whole genome shotgun sequence
43	167520	167562	ATCATCATGCACAGGCATACAGGAAATGAGCTGAAAGTGGTTT	JQAP01000001.1 Xylella fastidiosa strain ATCC 35879 contig1, whole genome shotgun sequence
43	167565	167607	AATCAACAATCGCTAGTTTTTCTAGCTATAGCTATGAGCGCTT	JQAP01000002.1 Xylella fastidiosa strain ATCC 35879 contig2, whole genome shotgun sequence
43	167663	167705	GTTCAACCTGCGCGAATTGGGTTACAGCGATCCGCATAAGCTC	JQAP01000015.1 Xylella fastidiosa strain ATCC 35879 contig15, whole genome shotgun sequence
43	167913	167955	ATATAGTGTCCTGTACCCTTTTCCGTGATTGAGGATCACTACA	JQAP01000001.1 Xylella fastidiosa strain ATCC 35879 contig1, whole genome shotgun sequence
43	168573	168615	TTTTCTGGTACAGGAATTTATAAGCGAAGCTGACAGTGCGGAC	JQAP01000015.1 Xylella fastidiosa strain ATCC 35879 contig15, whole genome shotgun sequence
43	168632	168674	ATAGGTGAGGGCGGGCTGACTGCCTTTATCCGGTTCAACTACA	JQAP01000002.1 Xylella fastidiosa strain ATCC 35879 contig2, whole genome shotgun sequence
43	168954	168996	GCCCTGATGGATTATTTAGGTCATAGCTACAACTTATCGATCA	JQAP01000015.1 Xylella fastidiosa strain ATCC 35879 contig15, whole genome shotgun sequence
43	169019	169061	GGCATCAAAATTTATTTTTTGATTAAAGCACTTTTGCTTAGGT	JQAP01000015.1 Xylella fastidiosa strain ATCC 35879 contig15, whole genome shotgun sequence
43	169671	169713	CAAGCGCTTTGCTTCTCAGCAGCCGATTGTGATCCATGAATTC	JQAP01000001.1 Xylella fastidiosa strain ATCC 35879 contig1, whole genome shotgun sequence
43	169749	169791	TTTGCGAGCTGATGTTGAACTTGGTGGTACAGATCAGAAGTTT	JQAP01000001.1 Xylella fastidiosa strain ATCC 35879 contig1, whole genome shotgun sequence
43	169882	169924	GTGGCTAAGATGTCCAAGTCCTTGGGGAATTACATTGGTATTA	JQAP01000001.1 Xylella fastidiosa strain ATCC 35879 contig1, whole genome shotgun sequence
43	169941	169983	CATTGTTACAAAAACTATGAAAATTGGTGACGATCTGATGTGG	JQAP01000001.1 Xylella fastidiosa strain ATCC 35879 contig1, whole genome shotgun sequence
43	170988	171030	CATTGGACGATTATTCAAGCAAACTCACTGAAGTAGTACAAAG	JQAP01000015.1 Xylella fastidiosa strain ATCC 35879 contig15, whole genome shotgun sequence
43	171346	171388	TGCACCAGAATCTGCACTGTCAGTCGCATTGGGGAACCTGATT	JQAP01000015.1 Xylella fastidiosa strain ATCC 35879 contig15, whole genome shotgun sequence
43	171603	171645	TCAGCGTGCAACCAGGAGACTTCTGCGGAGTGATTGCTACATT	JQAP01000015.1 Xylella fastidiosa strain ATCC 35879 contig15, whole genome shotgun sequence
43	172862	172904	CACCTGAGTGTGCGTTTGGCGCATAAGCAGCGTCTGTTGGAAA	JQAP01000002.1 Xylella fastidiosa strain ATCC 35879 contig2, whole genome shotgun sequence
43	173020	173062	CTATCTGCATGACGTGATCACTATGATCAATTTGCTTCGTGAA	JQAP01000004.1 Xylella fastidiosa strain ATCC 35879 contig4, whole genome shotgun sequence
43	173345	173387	GGTTTTAGGAAAGCAATCTGGGAAGGTTGGCCATAGAAGGTGA	JQAP01000001.1 Xylella fastidiosa strain ATCC 35879 contig1, whole genome shotgun sequence
43	174274	174316	CGTGATGAAGGAGTCGGCGTCTGCGGCGTTGACGGTGGTCCGT	JQAP01000002.1 Xylella fastidiosa strain ATCC 35879 contig2, whole genome shotgun sequence
43	174717	174759	TTCAAAAAAGAGTGTGCATACTGCCATACCAGCTAACACGTTG	JQAP01000014.1 Xylella fastidiosa strain ATCC 35879 contig14, whole genome shotgun sequence
43	174971	175013	TCAGCGTGTGCAGGTGGAATGGCGGCAGTTTTAAGCTTATTTG	JQAP01000004.1 Xylella fastidiosa strain ATCC 35879 contig4, whole genome shotgun sequence
43	176179	176221	CACGCGAGTTCGAGACCCTCAGTAACAAGCGCAAGCTGTTAGA	JQAP01000002.1 Xylella fastidiosa strain ATCC 35879 contig2, whole genome shotgun sequence
43	176584	176626	AGATCAAAGAATGGTATGCCGTTCATAGGGATGATTTCCGTCA	JQAP01000002.1 Xylella fastidiosa strain ATCC 35879 contig2, whole genome shotgun sequence
43	176603	176645	CCGTCGTGTGCTACGGTTCAATGACCCTCGCCGCTTCGGATGC	JQAP01000001.1 Xylella fastidiosa strain ATCC 35879 contig1, whole genome shotgun sequence
43	176943	176985	ATTGCGGTTGGACTGCTTGATTCCATTAACCACCAACTCCTTC	JQAP01000014.1 Xylella fastidiosa strain ATCC 35879 contig14, whole genome shotgun sequence
43	177000	177042	AGTACGTTCCGGGTGCGGCATGAGGATGGTGATGCGGCCATCA	JQAP01000004.1 Xylella fastidiosa strain ATCC 35879 contig4, whole genome shotgun sequence
43	177021	177063	AATCAACGCGCGACCAAGCAGTGCCATGTCATACGCACTGGAG	JQAP01000014.1 Xylella fastidiosa strain ATCC 35879 contig14, whole genome shotgun sequence
43	177161	177203	CCTCGCTACCAGCCACATGCTGAGCCAGCGCGATCGCAGCATC	JQAP01000014.1 Xylella fastidiosa strain ATCC 35879 contig14, whole genome shotgun sequence
43	177599	177641	GTCAGCGGCGGCAGAGCACCATGCCAGTGGTGAACATTGCGTC	JQAP01000001.1 Xylella fastidiosa strain ATCC 35879 contig1, whole genome shotgun sequence
43	177937	177979	TACCACCAAAAAATGATAACCCCCGTGAGCTAATAGACCCACC	JQAP01000001.1 Xylella fastidiosa strain ATCC 35879 contig1, whole genome shotgun sequence
43	177988	178030	AATACGCCACTCACCTCTGCGCGAAATATCATTAAATAACAAC	JQAP01000001.1 Xylella fastidiosa strain ATCC 35879 contig1, whole genome shotgun sequence
43	178427	178469	ATGACGCTCTTTGGAAACGGGAGCCCACTCCGTCCCCATGTCG	JQAP01000014.1 Xylella fastidiosa strain ATCC 35879 contig14, whole genome shotgun sequence
43	178767	178809	AGCGAGTGGCAGTTGCCATGGACCAATCATCTGTTCACGTGCG	JQAP01000004.1 Xylella fastidiosa strain ATCC 35879 contig4, whole genome shotgun sequence
43	179623	179665	AGTTGCTTGTTTGATGGGGACCAAGTTTTTCTTGCCTTACGAA	JQAP01000002.1 Xylella fastidiosa strain ATCC 35879 contig2, whole genome shotgun sequence
43	179908	179950	CGGCGCTATGTTTGTGCGTTCAATCACTTTGTACTTGGTTCGC	JQAP01000002.1 Xylella fastidiosa strain ATCC 35879 contig2, whole genome shotgun sequence
43	180752	180794	AATCTGACCTGTTTTGAGCAGAAATAGTCAGTTGTGTCTTGTT	JQAP01000002.1 Xylella fastidiosa strain ATCC 35879 contig2, whole genome shotgun sequence
43	180895	180937	AAACCAACGGTGCGTCAAAGGTTTGGGTGATTTCACAGCATTT	JQAP01000002.1 Xylella fastidiosa strain ATCC 35879 contig2, whole genome shotgun sequence
43	180975	181017	TTGTTGGCCCAGGTTGATCTTGCGTCTTCAGGAGCGTTTGGAG	JQAP01000002.1 Xylella fastidiosa strain ATCC 35879 contig2, whole genome shotgun sequence
43	181013	181055	ACTTTCAATCACACCTGGTGCTACGACGTTAACGGTGATGCCA	JQAP01000001.1 Xylella fastidiosa strain ATCC 35879 contig1, whole genome shotgun sequence
43	181148	181190	TGCCGTAACAGATGATATGCATACAATACGTCCCCAACGGGTG	JQAP01000001.1 Xylella fastidiosa strain ATCC 35879 contig1, whole genome shotgun sequence
43	181301	181343	GTGGATGCCTGCATTATTAATTATGATCTGGATTGGGCCAGCC	JQAP01000001.1 Xylella fastidiosa strain ATCC 35879 contig1, whole genome shotgun sequence
43	181351	181393	TGATTCCCAAAGAGCAATTTGTTGCGGCTATCGCTGATTCTTT	JQAP01000002.1 Xylella fastidiosa strain ATCC 35879 contig2, whole genome shotgun sequence
43	181713	181755	CTGTTGATCCGTGAGGCTGAGTCACGTGTTGACCTGACTGCGC	JQAP01000002.1 Xylella fastidiosa strain ATCC 35879 contig2, whole genome shotgun sequence
43	182087	182129	GATGCAAGACGAGTATGGCCCCGGTAAAGGTGGACGTGAGCGC	JQAP01000002.1 Xylella fastidiosa strain ATCC 35879 contig2, whole genome shotgun sequence
43	182260	182302	CTCGGTTAAAAGCCGAAAGGCTGTCCGACACGCTACCTCTGAC	JQAP01000001.1 Xylella fastidiosa strain ATCC 35879 contig1, whole genome shotgun sequence
43	182896	182938	TGGATCTGGTGTGAATAACTTTGGTGTGCAGCCACTGCTGGAT	JQAP01000001.1 Xylella fastidiosa strain ATCC 35879 contig1, whole genome shotgun sequence
43	183247	183289	AAGCTGAGCAATACAGCGACGCGTTGTATGAACGCATTAATTA	JQAP01000002.1 Xylella fastidiosa strain ATCC 35879 contig2, whole genome shotgun sequence
43	184035	184077	CCACATCCTGGCGCTAAAGCCAGGTTGCGAGTTTTCGACCACT	JQAP01000001.1 Xylella fastidiosa strain ATCC 35879 contig1, whole genome shotgun sequence
43	184396	184438	CATCATCGCTGCAGTGAAGGAGGTGGGTGTCAAAGTGCCTGTT	JQAP01000015.1 Xylella fastidiosa strain ATCC 35879 contig15, whole genome shotgun sequence
43	184459	184501	TCAATCCTCGATTCTTGAGGGTATTAATTTTTATTCTGGCTTT	JQAP01000002.1 Xylella fastidiosa strain ATCC 35879 contig2, whole genome shotgun sequence
43	184811	184853	TTTAGATTCGTCGTAAAGCCGACCAAGATATTCGCCGATGAGG	JQAP01000001.1 Xylella fastidiosa strain ATCC 35879 contig1, whole genome shotgun sequence
43	186085	186127	TCGCGGTGAGTGAGTGCCTGGACTTGGAGGGCAAGGTGGTCGC	JQAP01000015.1 Xylella fastidiosa strain ATCC 35879 contig15, whole genome shotgun sequence
43	186324	186366	GCCAAAGATGATGGATGTGGCACGCGCGGTGGGAGTTGCGCTG	JQAP01000015.1 Xylella fastidiosa strain ATCC 35879 contig15, whole genome shotgun sequence
43	186578	186620	ATAGAGTCCTGATGTTTGCGTACAAATGGTGCGTAGCTTTGGC	JQAP01000001.1 Xylella fastidiosa strain ATCC 35879 contig1, whole genome shotgun sequence
43	190886	190928	CTTGAGGTCGCCAGGGATATCACTCATGGAAGAAGTACATCGG	JQAP01000001.1 Xylella fastidiosa strain ATCC 35879 contig1, whole genome shotgun sequence
43	191233	191275	AAGTAGTCGGTTGCGCCTTGTTCCTGTCCATCAAGCCAGTGAA	JQAP01000001.1 Xylella fastidiosa strain ATCC 35879 contig1, whole genome shotgun sequence
43	191605	191647	ACCGGAAAGGATGTGGCCCTCACCTTGTGCGGTCAATACTTTC	JQAP01000001.1 Xylella fastidiosa strain ATCC 35879 contig1, whole genome shotgun sequence
43	193196	193238	CGGCTGCCATAGCTCGTTTGGTAAGCAGGAAATCCAATAAATT	JQAP01000004.1 Xylella fastidiosa strain ATCC 35879 contig4, whole genome shotgun sequence
43	193882	193924	GTCGCCTTGGGCGATTGCATCCACCACATCCTGGCCATCAAGT	JQAP01000002.1 Xylella fastidiosa strain ATCC 35879 contig2, whole genome shotgun sequence
43	194420	194462	GTCACCGATTGGGAATAGTGTTGCTGCTAATTGTTCCTGACCA	JQAP01000004.1 Xylella fastidiosa strain ATCC 35879 contig4, whole genome shotgun sequence
43	194485	194527	TCCTTACGACGGGTGCAAAACTCCGGGTCGTTTCGCATGTCCA	JQAP01000002.1 Xylella fastidiosa strain ATCC 35879 contig2, whole genome shotgun sequence
43	194735	194777	ACCAAGGATGCCGCAAACGGCTACGGCGTCGCGGCGATCTTCT	JQAP01000004.1 Xylella fastidiosa strain ATCC 35879 contig4, whole genome shotgun sequence
43	195408	195450	TGCGCTGCCAGCATTGAGCGTTGATGAACCGACAATCAGTATG	JQAP01000002.1 Xylella fastidiosa strain ATCC 35879 contig2, whole genome shotgun sequence
43	196045	196087	TTGCAAGAACGTGGGCGTTTGTTGATTGATGCTGGTGAGGATA	JQAP01000002.1 Xylella fastidiosa strain ATCC 35879 contig2, whole genome shotgun sequence
43	196108	196150	GCCATTCACGGACAATGAACAATGCTGCCAGGGAGCGCCCTTC	JQAP01000001.1 Xylella fastidiosa strain ATCC 35879 contig1, whole genome shotgun sequence
43	196118	196160	CAATCCATTGGCGCACGCTGTACTGAAGGCTTGCGGAGCGGAT	JQAP01000004.1 Xylella fastidiosa strain ATCC 35879 contig4, whole genome shotgun sequence
43	196472	196514	TGAGAATGAGGCTAAGGGGGAAAGTGAGGCGAATAAGGGGGAT	JQAP01000004.1 Xylella fastidiosa strain ATCC 35879 contig4, whole genome shotgun sequence
43	196795	196837	GGTTGCAGTCTTGACGCGTGACTTGATTCGGCGTCGTTATGCC	JQAP01000002.1 Xylella fastidiosa strain ATCC 35879 contig2, whole genome shotgun sequence
43	196975	197017	CAGTACGGTTTGCGGAGCACGTAGGGGATCAATGTCAAGGATG	JQAP01000015.1 Xylella fastidiosa strain ATCC 35879 contig15, whole genome shotgun sequence
43	197039	197081	GAAGATCGATATCGTCGAGCCTACCGCGGGCGAGGCTTTCGAG	JQAP01000004.1 Xylella fastidiosa strain ATCC 35879 contig4, whole genome shotgun sequence
43	197089	197131	ATCAATTGTGAAGGATTTGTTTCGCAAAGAAGTACTTGAGGCA	JQAP01000002.1 Xylella fastidiosa strain ATCC 35879 contig2, whole genome shotgun sequence
43	197195	197237	TTTGCATCCAGCGTTATGGCATTGTTAGTTGTGGTTTTTCTCT	JQAP01000002.1 Xylella fastidiosa strain ATCC 35879 contig2, whole genome shotgun sequence
43	197262	197304	GCTAACGGAGGTATTGTTTGCTCCCTCTCCTGATGCCTATTTG	JQAP01000001.1 Xylella fastidiosa strain ATCC 35879 contig1, whole genome shotgun sequence
43	197475	197517	ACTATGCGATGCACACGGTGCCTTGCTGATTTGCGATGAGATT	JQAP01000001.1 Xylella fastidiosa strain ATCC 35879 contig1, whole genome shotgun sequence
43	197792	197834	GGCGAGTTTTAAAAATGTGATCCTGGTAATGACGACCAATGCA	JQAP01000004.1 Xylella fastidiosa strain ATCC 35879 contig4, whole genome shotgun sequence
43	198366	198408	ATTACCCTGGTCCAAGCAATCACACGCGGTGAGAAAATGGATT	JQAP01000001.1 Xylella fastidiosa strain ATCC 35879 contig1, whole genome shotgun sequence
43	198393	198435	ATCCATTAGAAGGGCCACGCCTTCTACTCAGCGAACACAACAA	JQAP01000014.1 Xylella fastidiosa strain ATCC 35879 contig14, whole genome shotgun sequence
43	198618	198660	CACCGTAAATTTCCAATCACCGCAACGCTGCGCGGATCTCCCC	JQAP01000014.1 Xylella fastidiosa strain ATCC 35879 contig14, whole genome shotgun sequence
43	198681	198723	AGTCATCTCTATTTTTACGCGATCGCCGGTTAGGATGCGAATG	JQAP01000004.1 Xylella fastidiosa strain ATCC 35879 contig4, whole genome shotgun sequence
43	199406	199448	GGCGAACATTGTGTCGGCGCGTACGGTCCAGGTTGAAGTGCGT	JQAP01000004.1 Xylella fastidiosa strain ATCC 35879 contig4, whole genome shotgun sequence
43	200211	200253	CAACGACTCCTGTAGACTATCCGTGCTTGCATAGCAACCGTCC	JQAP01000001.1 Xylella fastidiosa strain ATCC 35879 contig1, whole genome shotgun sequence
43	200262	200304	GCAGGATGCCGTGCGCTTGACGCGTTTGCGCGCCGCTCCTAGT	JQAP01000001.1 Xylella fastidiosa strain ATCC 35879 contig1, whole genome shotgun sequence
43	200351	200393	ATAGATACTCTCCTCACGCTTAGGAAACGGTGCCAAACCACCT	JQAP01000014.1 Xylella fastidiosa strain ATCC 35879 contig14, whole genome shotgun sequence
43	200362	200404	CAGCCAACCGTCATCGGTGGTACCAAATGTGATTTCCTCTTCA	JQAP01000004.1 Xylella fastidiosa strain ATCC 35879 contig4, whole genome shotgun sequence
43	200439	200481	TGTCTTGCGTTACTCTAGCCTTTACTGCTGTGAGTAGCGCCTG	JQAP01000004.1 Xylella fastidiosa strain ATCC 35879 contig4, whole genome shotgun sequence
43	200513	200555	TAGCGAGCAAGGTTACGAAATACCGACCCCAATTCAGCAGCAG	JQAP01000001.1 Xylella fastidiosa strain ATCC 35879 contig1, whole genome shotgun sequence
43	200719	200761	ACAGCCATACTGCTCTAGGCCTGATAGGAAAGCATGCGTTAGG	JQAP01000004.1 Xylella fastidiosa strain ATCC 35879 contig4, whole genome shotgun sequence
43	201296	201338	GAACCGTTCCGCGTCCAGAGCTGCCATGCAGCCAAATCCAGCT	JQAP01000004.1 Xylella fastidiosa strain ATCC 35879 contig4, whole genome shotgun sequence
43	201578	201620	GACGCCAGCATCGTTACCGAGTACCTCCTCGACTGCGTTGTTC	JQAP01000004.1 Xylella fastidiosa strain ATCC 35879 contig4, whole genome shotgun sequence
43	201765	201807	TATCGTCTTGACCCCTCCGGAAGAAGATTATGAATTGCCGGAA	JQAP01000002.1 Xylella fastidiosa strain ATCC 35879 contig2, whole genome shotgun sequence
43	202035	202077	TAAATTCGGTACACGCAATGTGCGTTCGATTGTTGGTGCGGTG	JQAP01000002.1 Xylella fastidiosa strain ATCC 35879 contig2, whole genome shotgun sequence
43	203268	203310	GGTATCCAAGGTTTCTAATAACTGGGCAATCTCGGCTTCAATG	JQAP01000015.1 Xylella fastidiosa strain ATCC 35879 contig15, whole genome shotgun sequence
43	203904	203946	CTCGACACGAATACGTTCTCCTACGCGGGCGGCCGAACTCAAT	JQAP01000015.1 Xylella fastidiosa strain ATCC 35879 contig15, whole genome shotgun sequence
43	204451	204493	CGACTCATTACATGTGCCTTTCCCCACAGGTGCGCGCGTTTGA	JQAP01000002.1 Xylella fastidiosa strain ATCC 35879 contig2, whole genome shotgun sequence
43	204452	204494	CGGCGACATGCTGTATTTACCTCCTGGTACAGCAATGCCGGAG	JQAP01000004.1 Xylella fastidiosa strain ATCC 35879 contig4, whole genome shotgun sequence
43	204758	204800	TGGTTACAACCGAGCCGCGCGTTTGATCGAAGCTATGGAAACA	JQAP01000004.1 Xylella fastidiosa strain ATCC 35879 contig4, whole genome shotgun sequence
43	206103	206145	TGGTTTGACAGTGACTTTGTCTCCTAAGGCACCAAGGTTGGCG	JQAP01000015.1 Xylella fastidiosa strain ATCC 35879 contig15, whole genome shotgun sequence
43	206517	206559	CCGCTATCGGTTCTTGGCGCGCGATTATGTTGATTTTTCGATG	JQAP01000004.1 Xylella fastidiosa strain ATCC 35879 contig4, whole genome shotgun sequence
43	207883	207925	CCGGCGCGATTCTAAAGCGGGTCTCAGTTTTGTCAGTGTCAGT	JQAP01000015.1 Xylella fastidiosa strain ATCC 35879 contig15, whole genome shotgun sequence
43	207937	207979	TTGTCGTTGAGACCTAGGGGGAGTACCGAGGCCAGCTTCCAGA	JQAP01000004.1 Xylella fastidiosa strain ATCC 35879 contig4, whole genome shotgun sequence
43	208623	208665	AAACGGTACTGGAGGAACGTGACGACGACTTGGCATTCATTAC	JQAP01000015.1 Xylella fastidiosa strain ATCC 35879 contig15, whole genome shotgun sequence
43	208834	208876	GACCGAGAAGCACATCGGCCGTCCGGTGGTGGTGACGAACTAT	JQAP01000015.1 Xylella fastidiosa strain ATCC 35879 contig15, whole genome shotgun sequence
43	208975	209017	CGGCAGCCAACGTGAGGAGCGTTTGGAAATGCTTGATATACGG	JQAP01000015.1 Xylella fastidiosa strain ATCC 35879 contig15, whole genome shotgun sequence
43	210518	210560	AATCCAATCTGAGTGAATGATTTAAGACAACGTATCAAAACGG	JQAP01000004.1 Xylella fastidiosa strain ATCC 35879 contig4, whole genome shotgun sequence
43	210634	210676	CCATCCTTGGCTAATTTTTCCCGCTTCGGCATATTTAGGTCTG	JQAP01000002.1 Xylella fastidiosa strain ATCC 35879 contig2, whole genome shotgun sequence
43	210914	210956	TTTGTTGAAGATTCTGCTGATAGGGGATTCGCTAGAGGACGCC	JQAP01000004.1 Xylella fastidiosa strain ATCC 35879 contig4, whole genome shotgun sequence
43	211124	211166	GGACCCAGAAGCCACAGGACGGGAAAACATCTATCTACGTGGC	JQAP01000015.1 Xylella fastidiosa strain ATCC 35879 contig15, whole genome shotgun sequence
43	211184	211226	CAAGAGCGAAATAAACCGCTCTGTGAATGAAATCATCGAATTC	JQAP01000015.1 Xylella fastidiosa strain ATCC 35879 contig15, whole genome shotgun sequence
43	211274	211316	CGTACCTCAACGTGGTCAGCATGCTCATTCAGCATGTGTTCTC	JQAP01000002.1 Xylella fastidiosa strain ATCC 35879 contig2, whole genome shotgun sequence
43	211385	211427	GCAGCCCTTGCTCATTGTCCCTGATCTGCTGGCGGGACGGACC	JQAP01000004.1 Xylella fastidiosa strain ATCC 35879 contig4, whole genome shotgun sequence
43	212729	212771	GCCATGCAGCGCACTGTTGTCTAACAGGCGCATACGGCGGCCG	JQAP01000002.1 Xylella fastidiosa strain ATCC 35879 contig2, whole genome shotgun sequence
43	213518	213560	GAGCACGTCCAGCCGTCCGAAATGCCCAGCACAGCGTGCGATC	JQAP01000004.1 Xylella fastidiosa strain ATCC 35879 contig4, whole genome shotgun sequence
43	213811	213853	TATTGCTTAGACTATATAGTTGTTAGTTGATTGCTGAATTTGA	JQAP01000004.1 Xylella fastidiosa strain ATCC 35879 contig4, whole genome shotgun sequence
43	214039	214081	GGATGATCCGGGTCAGAATTCCTTCCGTCACGACGTGAATGCG	JQAP01000002.1 Xylella fastidiosa strain ATCC 35879 contig2, whole genome shotgun sequence
43	214931	214973	TGAAGCGCCTTACCTTGCCAAGCGAGATGGGGGAGCGTTTTCA	JQAP01000004.1 Xylella fastidiosa strain ATCC 35879 contig4, whole genome shotgun sequence
43	214974	215016	CCAGCACACCGATCAGGGTGTTGTCTTTGAGTAATGGCACCAC	JQAP01000002.1 Xylella fastidiosa strain ATCC 35879 contig2, whole genome shotgun sequence
43	215517	215559	TTAAAGACCACTCTGCCCAATGACAACACCAACAACATCAAAG	JQAP01000014.1 Xylella fastidiosa strain ATCC 35879 contig14, whole genome shotgun sequence
43	216325	216367	GCAGCGGTAAGTGCGCACATCGAACAGTTGCGGTGGACTAGCA	JQAP01000004.1 Xylella fastidiosa strain ATCC 35879 contig4, whole genome shotgun sequence
43	219222	219264	GAGCTGCGTGGCGGTAGGGTTTGCGAGTATGAGGTGTCTCCGG	JQAP01000001.1 Xylella fastidiosa strain ATCC 35879 contig1, whole genome shotgun sequence
43	222450	222492	TAAGGTCACTCTGACTTTAGAACCAGCTGCTTTGGAATTGCTC	JQAP01000001.1 Xylella fastidiosa strain ATCC 35879 contig1, whole genome shotgun sequence
43	222856	222898	TTGAATCAGCCATTCTTTCGTGCCTGCTTGTAAAGTAAAGATG	JQAP01000001.1 Xylella fastidiosa strain ATCC 35879 contig1, whole genome shotgun sequence
43	223598	223640	ATGTAATTTTTATCTTCTTTTTAGTGTTTTTATGAAGTAGTAG	JQAP01000001.1 Xylella fastidiosa strain ATCC 35879 contig1, whole genome shotgun sequence
43	224257	224299	GCACACCGCTTGGTCACCATCTTGAAAGCTGACCGGATCGTGG	JQAP01000015.1 Xylella fastidiosa strain ATCC 35879 contig15, whole genome shotgun sequence
43	225714	225756	ATGTCTAACATCAACTTTTACAAAACCCTTCACACTGACTTAA	JQAP01000015.1 Xylella fastidiosa strain ATCC 35879 contig15, whole genome shotgun sequence
43	226481	226523	CCACGTCGAATGTCTCGCGTTTGAGCAGGTGTTGGACGGTGTG	JQAP01000004.1 Xylella fastidiosa strain ATCC 35879 contig4, whole genome shotgun sequence
43	226687	226729	TCCGGCGTATGAAACGCTGGCAGCGTTTGTGCAGAACGAGTAT	JQAP01000001.1 Xylella fastidiosa strain ATCC 35879 contig1, whole genome shotgun sequence
43	226834	226876	GAGATAACAGAACGGATGATCTTATGTTAATGGTGTGTGTCTG	JQAP01000004.1 Xylella fastidiosa strain ATCC 35879 contig4, whole genome shotgun sequence
43	226926	226968	GCTTCCGCAAGGCGGTGGCGAATGATAAGGCGCATTTTGCGGA	JQAP01000001.1 Xylella fastidiosa strain ATCC 35879 contig1, whole genome shotgun sequence
43	227081	227123	GCAATGCCAGCGTTCCGCCGCCAGGCGCCCGGTGCCGAATATT	JQAP01000001.1 Xylella fastidiosa strain ATCC 35879 contig1, whole genome shotgun sequence
43	227317	227359	TGAAGGATGGGCGTTGTACGCTGAGCGCTTGGGTAAGGAGGCC	JQAP01000001.1 Xylella fastidiosa strain ATCC 35879 contig1, whole genome shotgun sequence
43	227552	227594	AGCGCACTCATTCCTGACAGGAACCAACCGATTAGCGACACCA	JQAP01000015.1 Xylella fastidiosa strain ATCC 35879 contig15, whole genome shotgun sequence
43	228260	228302	CGCAGCCGATGGCCGGAATATTAATGTGGCGATGTGGTGCCGC	JQAP01000004.1 Xylella fastidiosa strain ATCC 35879 contig4, whole genome shotgun sequence
43	229694	229736	AAAGATCAGCGGCGCCATGTCAGGCCGTCCCCAGGGACCATAG	JQAP01000014.1 Xylella fastidiosa strain ATCC 35879 contig14, whole genome shotgun sequence
43	230742	230784	GGTTGCGCAGGAGCACTCGCGAGCGACTTGGACTTCTTGTCAC	JQAP01000014.1 Xylella fastidiosa strain ATCC 35879 contig14, whole genome shotgun sequence
43	231351	231393	TTACTAGGTTGTAATTGCGTGGTCTGCAGGGTACGCAGTACTT	JQAP01000014.1 Xylella fastidiosa strain ATCC 35879 contig14, whole genome shotgun sequence
43	233590	233632	AGCGTTGAGGATTACCGTCGGTCTCATCCCATCAGGCGCTGGC	JQAP01000015.1 Xylella fastidiosa strain ATCC 35879 contig15, whole genome shotgun sequence
43	234006	234048	AGTTTAATAAAGCAGCTCACTTATGGAACACAAGAAGCGCCAA	JQAP01000014.1 Xylella fastidiosa strain ATCC 35879 contig14, whole genome shotgun sequence
43	235591	235633	GCATTCAGCGAGTTTCGCAAGTTGTTGACGGAGTAGAGTCGGA	JQAP01000014.1 Xylella fastidiosa strain ATCC 35879 contig14, whole genome shotgun sequence
43	240020	240062	GCGAACGGCCAGCTTAGCGATAATCCGCATCGTGTTTATCCAG	JQAP01000001.1 Xylella fastidiosa strain ATCC 35879 contig1, whole genome shotgun sequence
43	241515	241557	TCTATGTGTGTTCTTGTATGTTGCTCAGTTATCTAAGTGGCTT	JQAP01000001.1 Xylella fastidiosa strain ATCC 35879 contig1, whole genome shotgun sequence
43	241789	241831	ATTGTTGAAAACGGAAGGTGTGTCGCTTGATTTTACAGAGGAT	JQAP01000004.1 Xylella fastidiosa strain ATCC 35879 contig4, whole genome shotgun sequence
43	242776	242818	CTAGGCTGCTGGTGCCAGATCTGAGTTTCTGTCGTACGTCTTT	JQAP01000004.1 Xylella fastidiosa strain ATCC 35879 contig4, whole genome shotgun sequence
43	243244	243286	TCAATGGAGCAATATTGTCGCTACGGGAGTGTTTGCGATCGCT	JQAP01000014.1 Xylella fastidiosa strain ATCC 35879 contig14, whole genome shotgun sequence
43	243269	243311	CATTAGTCGCTCTGCTCCAGAGTTTATGATCGAATTGTTTAAA	JQAP01000001.1 Xylella fastidiosa strain ATCC 35879 contig1, whole genome shotgun sequence
43	243319	243361	GAGCCATGTGAAGCCTGTTTTTGGAGTGCTCCATTGCGAGGAT	JQAP01000004.1 Xylella fastidiosa strain ATCC 35879 contig4, whole genome shotgun sequence
43	243458	243500	GCAGGCTGTCTCCAACGAACTTAACGGCGAGCGTGTAGATATT	JQAP01000001.1 Xylella fastidiosa strain ATCC 35879 contig1, whole genome shotgun sequence
43	243493	243535	AATTTGTGTAATCACCCAGGGGGCGCGTTCGGTCGTTACCATT	JQAP01000004.1 Xylella fastidiosa strain ATCC 35879 contig4, whole genome shotgun sequence
43	243788	243830	TGCATCCATTCTGGTTATGGAAGGATTTAACACTATAGAGGAA	JQAP01000001.1 Xylella fastidiosa strain ATCC 35879 contig1, whole genome shotgun sequence
43	244100	244142	CCGTGTGCTTGACCTTGCAGGGGGCACCGGCGATATCGCAATG	JQAP01000004.1 Xylella fastidiosa strain ATCC 35879 contig4, whole genome shotgun sequence
43	244148	244190	CGAGGAAATTGCTCGTTTGGAACGTGGCGAATGAGTCGACAAT	JQAP01000001.1 Xylella fastidiosa strain ATCC 35879 contig1, whole genome shotgun sequence
43	244300	244342	TAAGCTTGCCGAGCTGGTCAACACGCCGGTTGAGAAACTGCTA	JQAP01000001.1 Xylella fastidiosa strain ATCC 35879 contig1, whole genome shotgun sequence
43	245022	245064	TGCCGTAGTGGAAATGATGTGAGTAGGTCACTGAACCTGGAAA	JQAP01000014.1 Xylella fastidiosa strain ATCC 35879 contig14, whole genome shotgun sequence
43	245192	245234	CCATGAAGATCATTGCTCACTGGGCATGATCGAAAGGGTCCGC	JQAP01000014.1 Xylella fastidiosa strain ATCC 35879 contig14, whole genome shotgun sequence
43	245536	245578	GGGGGAGGCTGGTGGCATCACTCAGCACATCGGTGCTTACCAT	JQAP01000001.1 Xylella fastidiosa strain ATCC 35879 contig1, whole genome shotgun sequence
43	245911	245953	GATTGCACATGAGTTGGCGCATAGTTGGTCTGGCAATTTGGTG	JQAP01000004.1 Xylella fastidiosa strain ATCC 35879 contig4, whole genome shotgun sequence
43	246100	246142	TATTCCCAAAGCCGATCAAAAATTGGTGCTGTCGACGTTGACC	JQAP01000004.1 Xylella fastidiosa strain ATCC 35879 contig4, whole genome shotgun sequence
43	247530	247572	TTCTTGCTTATGTCTCGCATTTCCTATCGTCGTTTGGATGGTA	JQAP01000001.1 Xylella fastidiosa strain ATCC 35879 contig1, whole genome shotgun sequence
43	247760	247802	AGGTGTTCCTGGTGCCGTGTTATGGATGAGTTTATTAATGGTG	JQAP01000004.1 Xylella fastidiosa strain ATCC 35879 contig4, whole genome shotgun sequence
43	247935	247977	ATGCCGATGCCAAATTACTGAGTTCTCGGTTTACTGCTGATTT	JQAP01000004.1 Xylella fastidiosa strain ATCC 35879 contig4, whole genome shotgun sequence
43	247986	248028	GTCACAGTTATGATCGTAGGAGATTTTTTGCGTTCTTGCGCCA	JQAP01000004.1 Xylella fastidiosa strain ATCC 35879 contig4, whole genome shotgun sequence
43	248159	248201	TCAGATACCGAAGATGTTGACGTTGGATGCATTGGAGCAGGCA	JQAP01000001.1 Xylella fastidiosa strain ATCC 35879 contig1, whole genome shotgun sequence
43	248226	248268	AGTGGTGATAACAATATGATCAATGCAACTTATCATTTACAAC	JQAP01000014.1 Xylella fastidiosa strain ATCC 35879 contig14, whole genome shotgun sequence
43	248583	248625	ATCTCTGCCAACTCCGCGTCTTTTTAGAGAACCCACTATGTCG	JQAP01000001.1 Xylella fastidiosa strain ATCC 35879 contig1, whole genome shotgun sequence
43	248635	248677	CAGTGCCAAGATCGTAATGACTTGCCATTCTGTGGCAGCAATG	JQAP01000004.1 Xylella fastidiosa strain ATCC 35879 contig4, whole genome shotgun sequence
43	248666	248708	ACATATTCTGCTACACTTCGAAGCGCGAGATAAGGGTTTGATT	JQAP01000015.1 Xylella fastidiosa strain ATCC 35879 contig15, whole genome shotgun sequence
43	248811	248853	TGATTACCTTAATAAAAAGGAAAACGAACGTTATAAGTTGTTG	JQAP01000001.1 Xylella fastidiosa strain ATCC 35879 contig1, whole genome shotgun sequence
43	248966	249008	ACCGCGTTATTTGCAAACACTCAGCATAGTTGATCCGTTTATA	JQAP01000001.1 Xylella fastidiosa strain ATCC 35879 contig1, whole genome shotgun sequence
43	249722	249764	CGTGCTGACATCGGCGAAATTCTAGTCGATACAGAGGAAATGT	JQAP01000015.1 Xylella fastidiosa strain ATCC 35879 contig15, whole genome shotgun sequence
43	249734	249776	CGTTGCACGTGCCGACGGCCCTTATCTGTTTGACGTCGACGGC	JQAP01000014.1 Xylella fastidiosa strain ATCC 35879 contig14, whole genome shotgun sequence
43	249927	249969	GCGCGGCTCGTGCCATCCTGCGAAATGGTGCGCATGGTCAACT	JQAP01000014.1 Xylella fastidiosa strain ATCC 35879 contig14, whole genome shotgun sequence
43	249930	249972	ACCACGTGTGGTGGCTGTATGAAGGAGGGGCTTCTGGAATTGA	JQAP01000004.1 Xylella fastidiosa strain ATCC 35879 contig4, whole genome shotgun sequence
43	250165	250207	TGCACGCGTGCAGCTTAGCCGGATCTCACGCTTCGGCCTGTTG	JQAP01000015.1 Xylella fastidiosa strain ATCC 35879 contig15, whole genome shotgun sequence
43	250788	250830	AGATATATCTAGGTACTGATGCAACCTGTAAGCGCTGGATAGT	JQAP01000004.1 Xylella fastidiosa strain ATCC 35879 contig4, whole genome shotgun sequence
43	250798	250840	AAGTAACAGCTCGCATCCTGCGCCCCTGCAACAGAACCGCAAT	JQAP01000015.1 Xylella fastidiosa strain ATCC 35879 contig15, whole genome shotgun sequence
43	250855	250897	CGTTTTATGGTTTGAGTTGGTGTCCTTAAAGGGTTTTTAAATT	JQAP01000004.1 Xylella fastidiosa strain ATCC 35879 contig4, whole genome shotgun sequence
43	250944	250986	AATGGTAACTATTTTCTATATCGTTCTGTAAACGCTACAGGTA	JQAP01000004.1 Xylella fastidiosa strain ATCC 35879 contig4, whole genome shotgun sequence
43	251693	251735	GTCAGGTGTTTTTGTTTCAGTGTCGATATCCATTTTATTGCTT	JQAP01000004.1 Xylella fastidiosa strain ATCC 35879 contig4, whole genome shotgun sequence
43	251837	251879	ACGCACGCGTGGATGTGGAGAGAGACCAGTTTGGACAGCGTGG	JQAP01000014.1 Xylella fastidiosa strain ATCC 35879 contig14, whole genome shotgun sequence
43	251945	251987	ACTCTCTCTACGGCACATCCCTCTGCCAAGGCACCTCCATCAG	JQAP01000015.1 Xylella fastidiosa strain ATCC 35879 contig15, whole genome shotgun sequence
43	252435	252477	ATAGTGACAACAATACACTATAAAATTATTAACAACCTTGCTT	JQAP01000015.1 Xylella fastidiosa strain ATCC 35879 contig15, whole genome shotgun sequence
43	252500	252542	CCGGACCAAGAAATGCCCAGGGAATGATACACCGTCTAGAGGA	JQAP01000004.1 Xylella fastidiosa strain ATCC 35879 contig4, whole genome shotgun sequence
43	252845	252887	CTACCTGAAAGCATCATTTTGAGGAAGAAAATCTGGATTTCGA	JQAP01000015.1 Xylella fastidiosa strain ATCC 35879 contig15, whole genome shotgun sequence
43	252855	252897	TCATCGTCGACAGTGGCGAGGTTGTTCCAGAGGGGTAGTAGCA	JQAP01000004.1 Xylella fastidiosa strain ATCC 35879 contig4, whole genome shotgun sequence
43	253081	253123	GGCAATTTCCAACTCACGCGGTGACAAAACATCAAAAGGTGAA	JQAP01000015.1 Xylella fastidiosa strain ATCC 35879 contig15, whole genome shotgun sequence
43	253165	253207	GCTGTTACCAAGATAGCGCTTCCCTAAAGCCACTTCACGGATA	JQAP01000015.1 Xylella fastidiosa strain ATCC 35879 contig15, whole genome shotgun sequence
43	253226	253268	AGCATTACGCAAGCACATCACCGCAAGCGGTAAAAACGAGGAA	JQAP01000014.1 Xylella fastidiosa strain ATCC 35879 contig14, whole genome shotgun sequence
43	253305	253347	ATAGGCCAGCCACCAGATGCCAGTGCAGTCCATTGCGCACGCA	JQAP01000014.1 Xylella fastidiosa strain ATCC 35879 contig14, whole genome shotgun sequence
43	253380	253422	TGTCCATCTGCTCTGGCGTAATTGCTAAGTAGCAATAGGGAGA	JQAP01000004.1 Xylella fastidiosa strain ATCC 35879 contig4, whole genome shotgun sequence
43	253533	253575	ATACCGGATCCATACCTTGGTAACGCGAAAGACTTCGAACATG	JQAP01000014.1 Xylella fastidiosa strain ATCC 35879 contig14, whole genome shotgun sequence
43	254116	254158	AGTTGAGGGGACTCATGACGGCGCCACGTTAGTGGATAGCAAG	JQAP01000004.1 Xylella fastidiosa strain ATCC 35879 contig4, whole genome shotgun sequence
43	254254	254296	GACGCAGTTTAAAATGGGTACTGAGTCTGGTCGTATCTCCTTC	JQAP01000004.1 Xylella fastidiosa strain ATCC 35879 contig4, whole genome shotgun sequence
43	254320	254362	GCGCGCGAATGGTTTATATGCACTAACACTATACTTCACATGC	JQAP01000015.1 Xylella fastidiosa strain ATCC 35879 contig15, whole genome shotgun sequence
43	254562	254604	GGGTCAAAGGCATTGAGCGTGCCGCGTGGAGTCAGAACTACGT	JQAP01000004.1 Xylella fastidiosa strain ATCC 35879 contig4, whole genome shotgun sequence
43	254787	254829	ACCCAACTAAAACACTGAGAAGGCCACCGGAACTTGATGGTAC	JQAP01000015.1 Xylella fastidiosa strain ATCC 35879 contig15, whole genome shotgun sequence
43	254905	254947	CATGCACGATATAACGTGGTACACGTGCCTGCCAATCGTTATA	JQAP01000001.1 Xylella fastidiosa strain ATCC 35879 contig1, whole genome shotgun sequence
43	255100	255142	GTTGGATGGTCAGCGCGGCACTGTGCTGCGTGACTGGGATTTC	JQAP01000004.1 Xylella fastidiosa strain ATCC 35879 contig4, whole genome shotgun sequence
43	255227	255269	ACAAGCAGACTGATGACTACATTGGTCAAACGTCAACATCATT	JQAP01000015.1 Xylella fastidiosa strain ATCC 35879 contig15, whole genome shotgun sequence
43	255644	255686	TGGCTGGGCTATTCCCGTCAGGAAGCTGAGATTGCTATTCCAG	JQAP01000004.1 Xylella fastidiosa strain ATCC 35879 contig4, whole genome shotgun sequence
43	255703	255745	CACGCGTGGTAAACAGATCGAAAATGTGCCGCGTTGGCTTACC	JQAP01000004.1 Xylella fastidiosa strain ATCC 35879 contig4, whole genome shotgun sequence
43	262485	262527	GCCACATATGAATCAGATACGCCATTGGTGCTGAATACCTTGT	JQAP01000015.1 Xylella fastidiosa strain ATCC 35879 contig15, whole genome shotgun sequence
43	262992	263034	TTGAATTGCGCGGTAATGGACAAACAGGTCGGGCCCATTATTC	JQAP01000015.1 Xylella fastidiosa strain ATCC 35879 contig15, whole genome shotgun sequence
43	263065	263107	CGTGAGCAGATTCCGGTGGTGTCGTTATATTTTGCTGCACCGC	JQAP01000004.1 Xylella fastidiosa strain ATCC 35879 contig4, whole genome shotgun sequence
43	263326	263368	CCAGTCTACTGATTGAGAAATAACTCGCACAATATATGCGTCT	JQAP01000015.1 Xylella fastidiosa strain ATCC 35879 contig15, whole genome shotgun sequence
43	265071	265113	GTGAGTTTTATTTCTCCGTTCAGGGATGAACGGCAGTTGGCCC	JQAP01000004.1 Xylella fastidiosa strain ATCC 35879 contig4, whole genome shotgun sequence
43	266183	266225	TCGTGGGCGGCAGCTAAGCGCAGATGGATGACCTCTTCACTGT	JQAP01000004.1 Xylella fastidiosa strain ATCC 35879 contig4, whole genome shotgun sequence
43	266682	266724	GTGTGCGATGTCACTGCCGTTAAAGGCACTATTACGGTTATTC	JQAP01000004.1 Xylella fastidiosa strain ATCC 35879 contig4, whole genome shotgun sequence
43	266965	267007	CACCAACTCTTGCTCAATGCGACCGTGATCGACGGGATACGAC	JQAP01000004.1 Xylella fastidiosa strain ATCC 35879 contig4, whole genome shotgun sequence
43	268015	268057	GCGCACGATTACCTTGGATTGTGATGTGTTACAGGCAGATGGC	JQAP01000004.1 Xylella fastidiosa strain ATCC 35879 contig4, whole genome shotgun sequence
43	269196	269238	AGACGATGAATCGGCTCCCGTTGCAGATGCACAAAGCACACCC	JQAP01000014.1 Xylella fastidiosa strain ATCC 35879 contig14, whole genome shotgun sequence
43	270237	270279	CAACTCACTACACACTTAATCAGAAACTGCGAGTTGCTCCTTA	JQAP01000014.1 Xylella fastidiosa strain ATCC 35879 contig14, whole genome shotgun sequence
43	270855	270897	GACAGCTGCTGCACTGCCACTGGCTGAAAATAGCGAGATAGAT	JQAP01000004.1 Xylella fastidiosa strain ATCC 35879 contig4, whole genome shotgun sequence
43	271328	271370	CATTGGCGAAATCTCAATCACAACATGACCATACTGACCCTTA	JQAP01000015.1 Xylella fastidiosa strain ATCC 35879 contig15, whole genome shotgun sequence
43	271497	271539	ATTCTTACCTTCTGGAGCAGGCGGTGAGACTGTTTTATGTCCA	JQAP01000004.1 Xylella fastidiosa strain ATCC 35879 contig4, whole genome shotgun sequence
43	271964	272006	ATCGCTTACTGCGTCCACGCCATCGACGCTGATGCAGCCCTGA	JQAP01000014.1 Xylella fastidiosa strain ATCC 35879 contig14, whole genome shotgun sequence
43	272414	272456	ACGCGCCTTCAATTGCTCGACAACTTTATCAAAGTTAGCACCG	JQAP01000015.1 Xylella fastidiosa strain ATCC 35879 contig15, whole genome shotgun sequence
43	273483	273525	GAACCTTTACGAGACATTATTAGCTGACTCCTTTAACTCTTCG	JQAP01000015.1 Xylella fastidiosa strain ATCC 35879 contig15, whole genome shotgun sequence
43	273735	273777	AATCATTAGGGGTCAAATATTGATATGTAATTCAATAATCGAT	JQAP01000001.1 Xylella fastidiosa strain ATCC 35879 contig1, whole genome shotgun sequence
43	273895	273937	ATTCTTCTAAATAAAGCACAAAAGCCTGTGCATTAATAAAGGG	JQAP01000015.1 Xylella fastidiosa strain ATCC 35879 contig15, whole genome shotgun sequence
43	274298	274340	GCGACCAACGATGACATTTTCTTTCAAACCACGCAAATTATCC	JQAP01000015.1 Xylella fastidiosa strain ATCC 35879 contig15, whole genome shotgun sequence
43	274568	274610	CTCAACTTTGCGCAACATTTGCCGTGTAATGACTTCAATATGC	JQAP01000015.1 Xylella fastidiosa strain ATCC 35879 contig15, whole genome shotgun sequence
43	274756	274798	CTTTCCATTCTGTTGTGCTGTTTGCTTGAACCATTTAAATGAT	JQAP01000001.1 Xylella fastidiosa strain ATCC 35879 contig1, whole genome shotgun sequence
43	275222	275264	GACAGTGACACCATCAACAAAATCGATAAAACGGACAAAACCT	JQAP01000015.1 Xylella fastidiosa strain ATCC 35879 contig15, whole genome shotgun sequence
43	276035	276077	CGTAGAGTTGAAATATTCCTGGACACTCAAACCTTCACGAAAG	JQAP01000015.1 Xylella fastidiosa strain ATCC 35879 contig15, whole genome shotgun sequence
43	276491	276533	CAATTTATCTGCAAATACAACAGTTTCCTTCAAGCCAAGCATG	JQAP01000015.1 Xylella fastidiosa strain ATCC 35879 contig15, whole genome shotgun sequence
43	276881	276923	CGCTGGAGACAGTATGTTGTTAGTAGACATCATCAACGCACGC	JQAP01000015.1 Xylella fastidiosa strain ATCC 35879 contig15, whole genome shotgun sequence
43	277334	277376	AAGCAAATTTTGGCGAAAACGACCCTGTTTACCCTTAATCATG	JQAP01000015.1 Xylella fastidiosa strain ATCC 35879 contig15, whole genome shotgun sequence
43	277751	277793	TTCCTCACGCAAACGAGCCATCTCCGATTGCAAGTCAATCATT	JQAP01000015.1 Xylella fastidiosa strain ATCC 35879 contig15, whole genome shotgun sequence
43	278126	278168	CTTCATGCGCTTATATTTGCCACATAAACATTCATAGTCCTTG	JQAP01000015.1 Xylella fastidiosa strain ATCC 35879 contig15, whole genome shotgun sequence
43	278204	278246	ACGCTCAGGCTTAAAAGTGCGGTAGTTGATTGTTTCCGGCTTC	JQAP01000015.1 Xylella fastidiosa strain ATCC 35879 contig15, whole genome shotgun sequence
43	278575	278617	GTACATCTGATTACGCCCCTGAACATCATCAGACTTTACAGTC	JQAP01000015.1 Xylella fastidiosa strain ATCC 35879 contig15, whole genome shotgun sequence
43	278704	278746	CTTACCACCCAATGGTTGCTGAGTAACCAGTGAATAAGGGCCA	JQAP01000015.1 Xylella fastidiosa strain ATCC 35879 contig15, whole genome shotgun sequence
43	279515	279557	TTCAAACCATCAAGATAAGGATCAGTGATGACCTCACCCTTTT	JQAP01000015.1 Xylella fastidiosa strain ATCC 35879 contig15, whole genome shotgun sequence
43	279838	279880	CAGCCTTGAATGAGTAGGTTGGTGGTCAGGCAGCGTCGTGTTC	JQAP01000001.1 Xylella fastidiosa strain ATCC 35879 contig1, whole genome shotgun sequence
43	279904	279946	AGCACCGATGTACACCACACCTGACTCATCTAGACGATTTAAT	JQAP01000015.1 Xylella fastidiosa strain ATCC 35879 contig15, whole genome shotgun sequence
43	280015	280057	ACAAGTCAGCTCCTCAATGTGAATTGTAGTGTAGCGATCCTCT	JQAP01000015.1 Xylella fastidiosa strain ATCC 35879 contig15, whole genome shotgun sequence
43	280534	280576	AGCAGCAGCAACTGACACTGTCTGCATCGGCGAAACATCCATG	JQAP01000015.1 Xylella fastidiosa strain ATCC 35879 contig15, whole genome shotgun sequence
43	280862	280904	ATGCTCCTTAATGGCCGAACGAGTTGAATGGATCAAACCGTCA	JQAP01000014.1 Xylella fastidiosa strain ATCC 35879 contig14, whole genome shotgun sequence
43	280894	280936	TTCGAAACCAGCTCGCTCACGTGTTAATCCACCTGGACCCAAT	JQAP01000015.1 Xylella fastidiosa strain ATCC 35879 contig15, whole genome shotgun sequence
43	281129	281171	AGGTTCGATACCCGCCAAATCAAATTTAGCAAGCGATTTATTG	JQAP01000014.1 Xylella fastidiosa strain ATCC 35879 contig14, whole genome shotgun sequence
43	281485	281527	ACGCATCATGCGATATATTTCAACCTGCGCCTCAAGCTGAGTT	JQAP01000015.1 Xylella fastidiosa strain ATCC 35879 contig15, whole genome shotgun sequence
43	281874	281916	CCAACTCAAGCTGCACCCCTTCATCAGGATTAATATGAAACGT	JQAP01000015.1 Xylella fastidiosa strain ATCC 35879 contig15, whole genome shotgun sequence
43	282100	282142	CGAACTGTGTGTCTTGCCACGATCGTGGTCAAAAAAGACACCT	JQAP01000015.1 Xylella fastidiosa strain ATCC 35879 contig15, whole genome shotgun sequence
43	282325	282367	ATAACTCATACCACGCTGCCGGCATTCACGTTCATCGAACATC	JQAP01000015.1 Xylella fastidiosa strain ATCC 35879 contig15, whole genome shotgun sequence
43	282993	283035	CAAACCAGTGACAGCACGAACGGCTTTGATCACTTCAACTTTC	JQAP01000015.1 Xylella fastidiosa strain ATCC 35879 contig15, whole genome shotgun sequence
43	283267	283309	ATTTTCTAGCGAGTCTTTAACGCATCACGCTTCACTGGTTTCA	JQAP01000015.1 Xylella fastidiosa strain ATCC 35879 contig15, whole genome shotgun sequence
43	283913	283955	TGCTTCAAATAACCCGCTCACAGCTCCTGCCGATTACGGTTTC	JQAP01000015.1 Xylella fastidiosa strain ATCC 35879 contig15, whole genome shotgun sequence
43	284089	284131	CTACGTAGGCTTTCCCTTAAATAAAAATTAAGCGTTCTACAGA	JQAP01000015.1 Xylella fastidiosa strain ATCC 35879 contig15, whole genome shotgun sequence
43	284679	284721	CACGACGTCGTAATTTAGATCACCCGCCTGCATCTTCTCAGCC	JQAP01000015.1 Xylella fastidiosa strain ATCC 35879 contig15, whole genome shotgun sequence
43	284706	284748	GCAACGTAGAGCTTGACGACGGCGACCAATGCCAGCTACGTCG	JQAP01000014.1 Xylella fastidiosa strain ATCC 35879 contig14, whole genome shotgun sequence
43	284994	285036	AGCTTTTTGACGCTTTGTCTGCACCATAAGTTCAACCCTCCAC	JQAP01000015.1 Xylella fastidiosa strain ATCC 35879 contig15, whole genome shotgun sequence
43	285167	285209	GGAGATCATTATTGTCATTGTGCTGATTGGTGGTGTGATCGCG	JQAP01000004.1 Xylella fastidiosa strain ATCC 35879 contig4, whole genome shotgun sequence
43	285215	285257	AACAAAATCGACGCTGGAGGGCTTTTTGTAATAAAGGTGAAAG	JQAP01000015.1 Xylella fastidiosa strain ATCC 35879 contig15, whole genome shotgun sequence
43	285312	285354	GACACGGGTAAGTTGCCAGGATCGTTGAACGATTTAGTGAATC	JQAP01000004.1 Xylella fastidiosa strain ATCC 35879 contig4, whole genome shotgun sequence
43	285416	285458	ACCTGAAGCTTAATGTAAGCAGTAACTTTCTTTGCCACCTGAA	JQAP01000015.1 Xylella fastidiosa strain ATCC 35879 contig15, whole genome shotgun sequence
43	285847	285889	TCCTGAACACGACGCAAGATAACATCAGCCTCATCACTACTGA	JQAP01000015.1 Xylella fastidiosa strain ATCC 35879 contig15, whole genome shotgun sequence
43	285939	285981	GGTCTCCTTAACCAAATGCCAACATTCATTATCGATTCGGGGC	JQAP01000015.1 Xylella fastidiosa strain ATCC 35879 contig15, whole genome shotgun sequence
43	286127	286169	TACGAGAAATACGATCACGCAACGCCTGCGCAACTGACTTCTC	JQAP01000015.1 Xylella fastidiosa strain ATCC 35879 contig15, whole genome shotgun sequence
43	286432	286474	TACAGCAGCGACGAAAACGAGAATAACAACCAAACCACGCAAC	JQAP01000015.1 Xylella fastidiosa strain ATCC 35879 contig15, whole genome shotgun sequence
43	286537	286579	CACCCCTAACACCAATAGCAAACTAGCAATGAAGTATTTGAAA	JQAP01000015.1 Xylella fastidiosa strain ATCC 35879 contig15, whole genome shotgun sequence
43	287937	287979	TCGTTCACAAGAACTCTATTCTGGGACAATAGCCGCATGAACA	JQAP01000014.1 Xylella fastidiosa strain ATCC 35879 contig14, whole genome shotgun sequence
43	288350	288392	TCGAGTCAAAATGGAGATTGCTCTAGCCAAAGGTAAACAGGCC	JQAP01000014.1 Xylella fastidiosa strain ATCC 35879 contig14, whole genome shotgun sequence
43	289087	289129	CATCACCGGCTTGAGCGTCAGCAAGAACAAATCGCGGACTAAA	JQAP01000015.1 Xylella fastidiosa strain ATCC 35879 contig15, whole genome shotgun sequence
43	289780	289822	GGCTCGTTCCAAAGCAGCATCAATAGCAATATTTTCATCGCAC	JQAP01000015.1 Xylella fastidiosa strain ATCC 35879 contig15, whole genome shotgun sequence
43	290205	290247	AGCGAAACCCAGCATTGTGCCTGGTTTTGATGTACTCACTACC	JQAP01000015.1 Xylella fastidiosa strain ATCC 35879 contig15, whole genome shotgun sequence
43	290527	290569	GAACTCGGGCAAATCTTTCGGTAAACACGATACCTGCACCTCA	JQAP01000015.1 Xylella fastidiosa strain ATCC 35879 contig15, whole genome shotgun sequence
43	291376	291418	GGTCTTACCGTTAACCTCCCCGATAATATTCATTACCGTAGCA	JQAP01000015.1 Xylella fastidiosa strain ATCC 35879 contig15, whole genome shotgun sequence
43	292379	292421	TGTTCTGTTTAGAGGCATTGTGTGCGCATGTCGTCGTAAAAAA	JQAP01000001.1 Xylella fastidiosa strain ATCC 35879 contig1, whole genome shotgun sequence
43	292405	292447	CAAAACCAACCTCTGAGAGCACATCAAGAGCACCCGCAACCGC	JQAP01000015.1 Xylella fastidiosa strain ATCC 35879 contig15, whole genome shotgun sequence
43	292691	292733	GGCCCCCAAACGTAACCCCAAAGCCGCCAAAACCGCAACGTCA	JQAP01000015.1 Xylella fastidiosa strain ATCC 35879 contig15, whole genome shotgun sequence
43	292780	292822	AATAGTGCAGCATTCGCCACATTGCAAGCCCAGTCATGATTAG	JQAP01000001.1 Xylella fastidiosa strain ATCC 35879 contig1, whole genome shotgun sequence
43	292883	292925	CGCACGCACCACCAAGTCGTCAGCCTCAACAACCCCAGTCACT	JQAP01000015.1 Xylella fastidiosa strain ATCC 35879 contig15, whole genome shotgun sequence
43	293036	293078	TCGCCCGGTAATTTGCAAAAATAAATTCAACTTGGCAGGTGCC	JQAP01000015.1 Xylella fastidiosa strain ATCC 35879 contig15, whole genome shotgun sequence
43	293181	293223	CCTCAATTTGCCGCGGCAACATCGGACGCCCCACGGAAGACGG	JQAP01000015.1 Xylella fastidiosa strain ATCC 35879 contig15, whole genome shotgun sequence
43	293263	293305	CACACGGTGAGGACGTCCCTCCGCATCTAACTGCACATCCCCA	JQAP01000015.1 Xylella fastidiosa strain ATCC 35879 contig15, whole genome shotgun sequence
43	293348	293390	TGTGCGCTGTCGGATAGTTGAGCTTTGACGTTGCTCCGGCCTT	JQAP01000001.1 Xylella fastidiosa strain ATCC 35879 contig1, whole genome shotgun sequence
43	293410	293452	GGCACCAGCTGCATCTTTCACCGCTTCGCTTGCAGCGAGTGCT	JQAP01000001.1 Xylella fastidiosa strain ATCC 35879 contig1, whole genome shotgun sequence
43	293538	293580	CCCGGACACTCCCACCATCACTCCCCTGCCTGATCGCCGCACG	JQAP01000015.1 Xylella fastidiosa strain ATCC 35879 contig15, whole genome shotgun sequence
43	293639	293681	ACCTGCGCAGTGGCATCCACCGTGACGGGCACCGACGCACGCC	JQAP01000015.1 Xylella fastidiosa strain ATCC 35879 contig15, whole genome shotgun sequence
43	293706	293748	AGAAAAACCTGCCGGTTCAGGCGCGACATTTGGATAAACTACA	JQAP01000014.1 Xylella fastidiosa strain ATCC 35879 contig14, whole genome shotgun sequence
43	293750	293792	TTCACATCATGCAAATACACCTTCATAACCCAAACTTTTCCAG	JQAP01000015.1 Xylella fastidiosa strain ATCC 35879 contig15, whole genome shotgun sequence
43	293904	293946	AATCTCTGGCTCCTTAGCTAAAGACCAAGCACGCTTAAGCTCC	JQAP01000015.1 Xylella fastidiosa strain ATCC 35879 contig15, whole genome shotgun sequence
43	296566	296608	AACTGCTGACACGCGCACGGCGACAACTAGCAAACGGCCGTCC	JQAP01000015.1 Xylella fastidiosa strain ATCC 35879 contig15, whole genome shotgun sequence
43	296568	296610	AGGGTGTTGACCTTGGGGTCGACTCTCATGTCAATATTTCATT	JQAP01000001.1 Xylella fastidiosa strain ATCC 35879 contig1, whole genome shotgun sequence
43	297110	297152	TTGGGCTGAGCTGTGAATGTGTTTGATGCCGGTGCTGCGTCTC	JQAP01000001.1 Xylella fastidiosa strain ATCC 35879 contig1, whole genome shotgun sequence
43	297616	297658	AAAGCACAACTGATCGAAAGCCAACGCAGCCAACAGGCCACAG	JQAP01000015.1 Xylella fastidiosa strain ATCC 35879 contig15, whole genome shotgun sequence
43	297628	297670	CAGATCCCAACTGTAGCGTTTTAATAAACGTCTTGGCTCCAAC	JQAP01000014.1 Xylella fastidiosa strain ATCC 35879 contig14, whole genome shotgun sequence
43	297761	297803	ACACCAAAAACCAATGGCGTACGCAACTGCACATCATGATCAA	JQAP01000014.1 Xylella fastidiosa strain ATCC 35879 contig14, whole genome shotgun sequence
43	297873	297915	ACTCAACTAAATCCTCACCAGTCGCAACGAACTGCGCATACCC	JQAP01000014.1 Xylella fastidiosa strain ATCC 35879 contig14, whole genome shotgun sequence
43	297935	297977	AATTGCCCCAACTGACACAACATCTGCGCCGCCATATCGGCAA	JQAP01000014.1 Xylella fastidiosa strain ATCC 35879 contig14, whole genome shotgun sequence
43	298090	298132	GAACAGCGCAGCCAAATCCATACCTATCCCATCGTTGAGGATA	JQAP01000014.1 Xylella fastidiosa strain ATCC 35879 contig14, whole genome shotgun sequence
43	298193	298235	TTAGCAAAAAATACCCGCTGCTGTCTTTCTTCAATCAAACTAC	JQAP01000014.1 Xylella fastidiosa strain ATCC 35879 contig14, whole genome shotgun sequence
43	298433	298475	TCACACCTTCTATAGAGACACCAAAGTTATGCATCAACTTTCG	JQAP01000014.1 Xylella fastidiosa strain ATCC 35879 contig14, whole genome shotgun sequence
43	299034	299076	CAGCAAGCAACTCATGACGCCTCCGCCGCACATCCCCCTCAGG	JQAP01000015.1 Xylella fastidiosa strain ATCC 35879 contig15, whole genome shotgun sequence
43	301169	301211	TGGATTTTCTAGATGTCCACGCGATCATTGCTAAGTAAGGCTA	JQAP01000004.1 Xylella fastidiosa strain ATCC 35879 contig4, whole genome shotgun sequence
43	301270	301312	CGCTCGGACACCGTAGATACAGTCACCACACCGTCACTCATAT	JQAP01000014.1 Xylella fastidiosa strain ATCC 35879 contig14, whole genome shotgun sequence
43	305879	305921	CCCATTTCCATTAGTGCAATGTGTCAAAGAAATTGGAGCTTCG	JQAP01000004.1 Xylella fastidiosa strain ATCC 35879 contig4, whole genome shotgun sequence
43	306229	306271	GATTAACAACGGCCACAGCAATAGCAATGCAATCATGGCCAGC	JQAP01000014.1 Xylella fastidiosa strain ATCC 35879 contig14, whole genome shotgun sequence
43	306567	306609	TTGTGGATGTCTGTAATAGCTCAAGCGCATTATTCTTTGATAC	JQAP01000004.1 Xylella fastidiosa strain ATCC 35879 contig4, whole genome shotgun sequence
43	306682	306724	TGATAAGGTCACGCTCAATGCTGGTGAGACTTCTCTCGTTTTA	JQAP01000004.1 Xylella fastidiosa strain ATCC 35879 contig4, whole genome shotgun sequence
43	306945	306987	AAAAACAAATCACCGAATACAATAACGTGTTACCAATAGCAAT	JQAP01000014.1 Xylella fastidiosa strain ATCC 35879 contig14, whole genome shotgun sequence
43	306976	307018	TGCCAAGTTTGATGATGAAATTACGCATCACACGATGATGCAT	JQAP01000004.1 Xylella fastidiosa strain ATCC 35879 contig4, whole genome shotgun sequence
43	307174	307216	TAAGGTGCCGACGCTTGCAGCGGCAGCGCATCGCTACTCGATT	JQAP01000004.1 Xylella fastidiosa strain ATCC 35879 contig4, whole genome shotgun sequence
43	307372	307414	CGCTTCGACATCAACAGTCCGTTTGGTGGGTTCGACTGGCGCT	JQAP01000004.1 Xylella fastidiosa strain ATCC 35879 contig4, whole genome shotgun sequence
43	307430	307472	CACCATAGCAACTGTCAAACCTAAAAAGACACCAAAAATTCCA	JQAP01000014.1 Xylella fastidiosa strain ATCC 35879 contig14, whole genome shotgun sequence
43	307600	307642	TGTCTATAAACATTTTGATCCACGTGCGAAAATCATCCGTGAG	JQAP01000004.1 Xylella fastidiosa strain ATCC 35879 contig4, whole genome shotgun sequence
43	308195	308237	GGTGGCGCGGCGGGCTTTGTGTAGGCCTACTTTCTTGCGTTCG	JQAP01000004.1 Xylella fastidiosa strain ATCC 35879 contig4, whole genome shotgun sequence
43	308255	308297	AGTCATAAAGCCAGCCTTACGCAGCTCAGGTTTCAGTGACGTA	JQAP01000004.1 Xylella fastidiosa strain ATCC 35879 contig4, whole genome shotgun sequence
43	308288	308330	GACCAGCCTCGAATTGAGGATTGGTTCGATCTTTAAACTGTTC	JQAP01000014.1 Xylella fastidiosa strain ATCC 35879 contig14, whole genome shotgun sequence
43	309464	309506	CCAATGTAGGCCTGACAGGGCAAGTAATGCCTGTTGATCAGGC	JQAP01000015.1 Xylella fastidiosa strain ATCC 35879 contig15, whole genome shotgun sequence
43	309582	309624	TTGGTACTCCGGCAGTTATATCTTGGGTGTTTTTGCTGGATTG	JQAP01000004.1 Xylella fastidiosa strain ATCC 35879 contig4, whole genome shotgun sequence
43	310340	310382	AGCGTCAACAGTTTGATCAAAGGTACACACCCGCACGCCCAAT	JQAP01000015.1 Xylella fastidiosa strain ATCC 35879 contig15, whole genome shotgun sequence
43	310417	310459	GCAGGTTGCCACGTCGATATCAGCACGGAAAGTTGCGATCCCT	JQAP01000004.1 Xylella fastidiosa strain ATCC 35879 contig4, whole genome shotgun sequence
43	310525	310567	ATTTTCGGGTACCAACAGCGCGGCGGCAAACAGGGCGGCATTG	JQAP01000015.1 Xylella fastidiosa strain ATCC 35879 contig15, whole genome shotgun sequence
43	311249	311291	GATACAGATCGCCAACTTCCCGGATAAATAAAGCACCTCCATC	JQAP01000015.1 Xylella fastidiosa strain ATCC 35879 contig15, whole genome shotgun sequence
43	311471	311513	GATCGAATCTACATTCACTAAGAATGCCTTCAAAAATCAGTAT	JQAP01000015.1 Xylella fastidiosa strain ATCC 35879 contig15, whole genome shotgun sequence
43	311480	311522	ACTACTTAAAACGACTCACTGACCGCAACATCGGCATCAGTAT	JQAP01000014.1 Xylella fastidiosa strain ATCC 35879 contig14, whole genome shotgun sequence
43	311730	311772	ATACGCTGAGCAACACGCACGAAGCTCCACAGAAATAAATTAC	JQAP01000014.1 Xylella fastidiosa strain ATCC 35879 contig14, whole genome shotgun sequence
43	311860	311902	AAGCGCGGATGGCCTCAGCATGCTGTAAGGTGAGACCGATATC	JQAP01000014.1 Xylella fastidiosa strain ATCC 35879 contig14, whole genome shotgun sequence
43	312436	312478	GTTGGGTAAAGGGTTTCATCAAGCTTCACCAGTGCTTAAATAT	JQAP01000014.1 Xylella fastidiosa strain ATCC 35879 contig14, whole genome shotgun sequence
43	316664	316706	TGGGTGGGCGTGGCAGATCCGTGCGAGATCGTCAGCTGAGCCA	JQAP01000004.1 Xylella fastidiosa strain ATCC 35879 contig4, whole genome shotgun sequence
43	317702	317744	GAAGAGCATCGCAATGCCACCGGTGAACTGTTTCACGATTTTG	JQAP01000004.1 Xylella fastidiosa strain ATCC 35879 contig4, whole genome shotgun sequence
43	317921	317963	ACGAATTCGCTGGTCAATTGCACTGGACAATGCGCAGATGAGA	JQAP01000015.1 Xylella fastidiosa strain ATCC 35879 contig15, whole genome shotgun sequence
43	318145	318187	GCCATCACCGACTAATAATGGAAGCCGATATGTTTTATCTCGA	JQAP01000015.1 Xylella fastidiosa strain ATCC 35879 contig15, whole genome shotgun sequence
43	320261	320303	ATATAACGTTGCCACCTCCATGTCACGCGTGGTACGTGCAGCA	JQAP01000015.1 Xylella fastidiosa strain ATCC 35879 contig15, whole genome shotgun sequence
43	320615	320657	AGCAGGATAACAATCTGAGGTGATCAAGTACGCAATCTTCTCC	JQAP01000015.1 Xylella fastidiosa strain ATCC 35879 contig15, whole genome shotgun sequence
43	320861	320903	GCTGGTCTTGACCGTATCCTCCAGTTTTCCGGACAGGTACTTG	JQAP01000004.1 Xylella fastidiosa strain ATCC 35879 contig4, whole genome shotgun sequence
43	321336	321378	TCGTCAATGGAAACGAAAACCGTTGCACACTGAACACATCTAA	JQAP01000015.1 Xylella fastidiosa strain ATCC 35879 contig15, whole genome shotgun sequence
43	321528	321570	AACGTTACGGAATCAAGTCATTCTCGGCATACCGTACTGTCGT	JQAP01000015.1 Xylella fastidiosa strain ATCC 35879 contig15, whole genome shotgun sequence
43	322523	322565	TCACGACGGTATCCGCATCCGCAGTCGGCTGCTCAAGGTAATA	JQAP01000015.1 Xylella fastidiosa strain ATCC 35879 contig15, whole genome shotgun sequence
43	324189	324231	AATCGCCTCGCGCACTCCCCCAAGTTCATCGACCAAACCACGT	JQAP01000015.1 Xylella fastidiosa strain ATCC 35879 contig15, whole genome shotgun sequence
43	324258	324300	ACGACCGCGAGCAATACTGTCAATCTCTTTCACGGAGCGGTGA	JQAP01000015.1 Xylella fastidiosa strain ATCC 35879 contig15, whole genome shotgun sequence
43	324528	324570	AATGCGATCAGCATCCATGCTAATCCAATACCCTCCGGAAGCA	JQAP01000015.1 Xylella fastidiosa strain ATCC 35879 contig15, whole genome shotgun sequence
43	324946	324988	CTTATCCACACTACCTGCGGCCGGTATGGGAGCATTGCTGGCG	JQAP01000014.1 Xylella fastidiosa strain ATCC 35879 contig14, whole genome shotgun sequence
43	330353	330395	CGTGATGGATGGCGGCGTAAGGTCCGGAGCAGCCACACCAAGC	JQAP01000014.1 Xylella fastidiosa strain ATCC 35879 contig14, whole genome shotgun sequence
43	330898	330940	TTCATCGCCCATATCAGCTTCTTATTGGCAATATTTTTACCTC	JQAP01000014.1 Xylella fastidiosa strain ATCC 35879 contig14, whole genome shotgun sequence
43	332320	332362	CATTCTGAGTATTAATGTGTTTGCTCTGTTGGCTTTAGGAATC	JQAP01000001.1 Xylella fastidiosa strain ATCC 35879 contig1, whole genome shotgun sequence
43	332586	332628	CGTTTCGATCTCAACTGCATCTGGCTGGAAACCGTTCTCCGGC	JQAP01000014.1 Xylella fastidiosa strain ATCC 35879 contig14, whole genome shotgun sequence
43	333403	333445	AAATTTAAACTGCGATGTAGTAATTCATTAAACATCGAACATC	JQAP01000014.1 Xylella fastidiosa strain ATCC 35879 contig14, whole genome shotgun sequence
43	333603	333645	CAAAACGTCAATCTCGCCGACCTCGGCTTTTACCTTGGCAAAG	JQAP01000001.1 Xylella fastidiosa strain ATCC 35879 contig1, whole genome shotgun sequence
43	333682	333724	GCTACTGGCCGCCAAAAAACTTGGACTAAAAGCCAAAGTCGTC	JQAP01000014.1 Xylella fastidiosa strain ATCC 35879 contig14, whole genome shotgun sequence
43	334003	334045	CTCATCAACCGAAAGTACCGATATCTGGTGCACGGCACTGATG	JQAP01000015.1 Xylella fastidiosa strain ATCC 35879 contig15, whole genome shotgun sequence
43	334111	334153	TGAAGTCATTGTCGTTGGCCTCATCTCCCTGGCCTTATTCGAA	JQAP01000014.1 Xylella fastidiosa strain ATCC 35879 contig14, whole genome shotgun sequence
43	334599	334641	AACCATTCCAAGCGCCGCTGTTAGGCAATTTGGCCACACCCAG	JQAP01000001.1 Xylella fastidiosa strain ATCC 35879 contig1, whole genome shotgun sequence
43	335232	335274	TTGCAATCCGCTGCATGACCATTCTGCCACCAGGCCTGAGAAC	JQAP01000004.1 Xylella fastidiosa strain ATCC 35879 contig4, whole genome shotgun sequence
43	335546	335588	GACCAAGTGCTGCTGAGTATCTCCAGAGACAACGATCACTGGC	JQAP01000015.1 Xylella fastidiosa strain ATCC 35879 contig15, whole genome shotgun sequence
43	335636	335678	TCCATCACCATCAGGCAGAAAAAGCGAAGTAGTCACCAAATCG	JQAP01000015.1 Xylella fastidiosa strain ATCC 35879 contig15, whole genome shotgun sequence
43	336487	336529	TCTGGAGTACGAACCACCACCACAGCAACATCGGGACGACCAC	JQAP01000015.1 Xylella fastidiosa strain ATCC 35879 contig15, whole genome shotgun sequence
43	336829	336871	GTCGGCGTTGTCTTCGCGCAGTTGTAATCGGTACTCTGCTCGG	JQAP01000004.1 Xylella fastidiosa strain ATCC 35879 contig4, whole genome shotgun sequence
43	337007	337049	ATCAGCAACCAATAAACGTGGTTCACTAATAATCGCACGAGCG	JQAP01000015.1 Xylella fastidiosa strain ATCC 35879 contig15, whole genome shotgun sequence
43	337078	337120	GATTGCTTTGGTTTCCAGTGATGCTTTGAGTCCGCGTGGGTCG	JQAP01000004.1 Xylella fastidiosa strain ATCC 35879 contig4, whole genome shotgun sequence
43	337425	337467	TCCTCGAACCGATCGTTGAGGCTAGGGGCCATGAAGCGTGCGA	JQAP01000001.1 Xylella fastidiosa strain ATCC 35879 contig1, whole genome shotgun sequence
43	337717	337759	AGGCGCTTTGAAATGCAACCCGGTGTGTGTAATCGCACCGCAT	JQAP01000004.1 Xylella fastidiosa strain ATCC 35879 contig4, whole genome shotgun sequence
43	337762	337804	AGTGTCCCCTTCAAACAGCAGGTCGTCCACTTCTGCTTGGAAT	JQAP01000004.1 Xylella fastidiosa strain ATCC 35879 contig4, whole genome shotgun sequence
43	338136	338178	ATCAGCTCCCAAACGCGCAGTACGGCCAATACGGTGAACGTAA	JQAP01000015.1 Xylella fastidiosa strain ATCC 35879 contig15, whole genome shotgun sequence
43	338517	338559	ATATTCAGAAGAAGGCTTTTGTTGTATGAGGTGCCGACTCCCG	JQAP01000004.1 Xylella fastidiosa strain ATCC 35879 contig4, whole genome shotgun sequence
43	339977	340019	CGAAAGCGGGAGCGCTACCTCGCATGGCGAAAGCGAAAAAACC	JQAP01000015.1 Xylella fastidiosa strain ATCC 35879 contig15, whole genome shotgun sequence
43	340250	340292	CAACAGACGGGATCGCTTCCGGAACCGACGCGAGCGTAATCGT	JQAP01000015.1 Xylella fastidiosa strain ATCC 35879 contig15, whole genome shotgun sequence
43	340385	340427	CCCAATATATTCGCTGAGCGATCTGAAAAAGATGCCAGCACAC	JQAP01000015.1 Xylella fastidiosa strain ATCC 35879 contig15, whole genome shotgun sequence
43	341009	341051	TGTATTACTGATTGACGAACGTCCTGAAGAAGTGACAGAAATG	JQAP01000015.1 Xylella fastidiosa strain ATCC 35879 contig15, whole genome shotgun sequence
43	341639	341681	AATGAAGCGCTAACTAATCCCTGTCCTTGCAGCCTAGACCATA	JQAP01000015.1 Xylella fastidiosa strain ATCC 35879 contig15, whole genome shotgun sequence
43	342260	342302	AAGGTCTTACTAGGCTGCATCCCAGCAGCAACCCTAGCCAAAT	JQAP01000015.1 Xylella fastidiosa strain ATCC 35879 contig15, whole genome shotgun sequence
43	342401	342443	GATGCAAACTTAACCTGCAACACAACATCCTCATCCTGTGCAG	JQAP01000015.1 Xylella fastidiosa strain ATCC 35879 contig15, whole genome shotgun sequence
43	342697	342739	CGGCGCGGAACCACCGGCACCAGTTTCAAACAAACCACCTCCC	JQAP01000015.1 Xylella fastidiosa strain ATCC 35879 contig15, whole genome shotgun sequence
43	349505	349547	TACTTCGTGATGCTGCTGACAGTTCATTCTTGGAGGTGTCCAA	JQAP01000014.1 Xylella fastidiosa strain ATCC 35879 contig14, whole genome shotgun sequence
43	350585	350627	TTTTTAATGCGGTGGAATCAGTCGGCTACATCGCTGAGGCAGA	JQAP01000014.1 Xylella fastidiosa strain ATCC 35879 contig14, whole genome shotgun sequence
43	351924	351966	TTTGACCAAGACCAATGCACGTTCCCCGGTGCATCGGGGCGGA	JQAP01000004.1 Xylella fastidiosa strain ATCC 35879 contig4, whole genome shotgun sequence
43	357927	357969	GGGTTTGGGATCATAAGACAGTGAAAGCTGTACGCGTTCTGTA	JQAP01000004.1 Xylella fastidiosa strain ATCC 35879 contig4, whole genome shotgun sequence
43	358774	358816	GGAGTCCGATGAATTTGCAAGAACGCATGTTCAATGTGAGGAG	JQAP01000004.1 Xylella fastidiosa strain ATCC 35879 contig4, whole genome shotgun sequence
43	359824	359866	ACCACGGGCACACAACGCACCATCGCTGAAGAACTCTTTAACA	JQAP01000015.1 Xylella fastidiosa strain ATCC 35879 contig15, whole genome shotgun sequence
43	360585	360627	TGCTAAGTTTGATTCTTCCAGAAAACCGAGTGCCTCGCGTCCG	JQAP01000001.1 Xylella fastidiosa strain ATCC 35879 contig1, whole genome shotgun sequence
43	362569	362611	AGATGTCAACGCCCTGTTGTTGGACGCGGTCGGCAATTTGGCG	JQAP01000014.1 Xylella fastidiosa strain ATCC 35879 contig14, whole genome shotgun sequence
43	364162	364204	AAACGCCTGGGCCACACTCTTTAAACAAGCAGGTGCCCGCTAT	JQAP01000015.1 Xylella fastidiosa strain ATCC 35879 contig15, whole genome shotgun sequence
43	365168	365210	GCACCAGGGCCGAGGAGCATCGCGCATTTCGTTTGGGCACGCT	JQAP01000014.1 Xylella fastidiosa strain ATCC 35879 contig14, whole genome shotgun sequence
43	365582	365624	ATTGGTCGAAATTCTGACTGTATGCCTCTTATTGGATTGTTTG	JQAP01000004.1 Xylella fastidiosa strain ATCC 35879 contig4, whole genome shotgun sequence
43	367113	367155	AATTTTGGCGGCAGTTGCTGCCGGAATCACGATGAGTTATGTC	JQAP01000004.1 Xylella fastidiosa strain ATCC 35879 contig4, whole genome shotgun sequence
43	367242	367284	TTTCGTGCTGCTCGGCGAGCAATTGCCTGGAATCCTTGATGAT	JQAP01000004.1 Xylella fastidiosa strain ATCC 35879 contig4, whole genome shotgun sequence
43	367395	367437	GTCATTGCAGTGGAATTTGTTTAAAGCGGTGTGTTGCGGCAAG	JQAP01000004.1 Xylella fastidiosa strain ATCC 35879 contig4, whole genome shotgun sequence
43	367523	367565	CGACAACGCCTACCGTGGTGCTGATGTGATCTACGCCAAGAGT	JQAP01000001.1 Xylella fastidiosa strain ATCC 35879 contig1, whole genome shotgun sequence
43	368293	368335	AGGTTAAATGACTGCTTTCAACGGTGCGGAAGAAAGCAAAAGA	JQAP01000004.1 Xylella fastidiosa strain ATCC 35879 contig4, whole genome shotgun sequence
43	368766	368808	GATGTTCCTCAATTGATGGCCCTTGCTTATGATTGTTTACGTG	JQAP01000004.1 Xylella fastidiosa strain ATCC 35879 contig4, whole genome shotgun sequence
43	369176	369218	CTGACAGAGCAATCCGTTTCAATTAATTAGTGGTTTGCTTTGC	JQAP01000004.1 Xylella fastidiosa strain ATCC 35879 contig4, whole genome shotgun sequence
43	369747	369789	GGTATGATTGAGTTCCAGGACTTCAATTCCGTGTTGTTTTAAA	JQAP01000004.1 Xylella fastidiosa strain ATCC 35879 contig4, whole genome shotgun sequence
43	370633	370675	ATTGCGGAATGCGAAGCTGCGGTCATACCAGCCACCGCCCATT	JQAP01000004.1 Xylella fastidiosa strain ATCC 35879 contig4, whole genome shotgun sequence
43	370792	370834	TTGTTTCAGGGGTTGTCCGGGGTGCCACGGTGCAAAGCGCAAT	JQAP01000004.1 Xylella fastidiosa strain ATCC 35879 contig4, whole genome shotgun sequence
43	370973	371015	AGGTGTTCTGCCAGTGTTACACCAGCGGCCAGACGTGCGTGTT	JQAP01000004.1 Xylella fastidiosa strain ATCC 35879 contig4, whole genome shotgun sequence
43	371340	371382	TTGAACCAGTGGTTCAAGTGGCGGCGTTGAAATACCATTGGGC	JQAP01000004.1 Xylella fastidiosa strain ATCC 35879 contig4, whole genome shotgun sequence
43	371823	371865	ATATTCACGGTCGAGGATGCGTATGCTGACCGGTTCAGTATCG	JQAP01000004.1 Xylella fastidiosa strain ATCC 35879 contig4, whole genome shotgun sequence
43	372875	372917	ATATGGGCGTCGTCGCCGTCAATTGATGAAGATGGTTGGTCCC	JQAP01000004.1 Xylella fastidiosa strain ATCC 35879 contig4, whole genome shotgun sequence
43	373208	373250	TCTGCTCGAAGGTAGGTCCCATGTCTATTATCATTTCGGTCGT	JQAP01000004.1 Xylella fastidiosa strain ATCC 35879 contig4, whole genome shotgun sequence
43	373543	373585	ACCTTATAGTGAATTTCTGTGAGCAACCCCGCAGTACAGGTGA	JQAP01000014.1 Xylella fastidiosa strain ATCC 35879 contig14, whole genome shotgun sequence
43	373990	374032	CAAGAGAAATTGATCTGTTTGTCGAAACCCGGACGCCACCACT	JQAP01000014.1 Xylella fastidiosa strain ATCC 35879 contig14, whole genome shotgun sequence
43	379318	379360	AGCAATACGACGCCCGTCGAGAATACGAGCCAAATCGGTGGCT	JQAP01000014.1 Xylella fastidiosa strain ATCC 35879 contig14, whole genome shotgun sequence
43	379367	379409	ATAGATACGATCACACCAAAGGTAAAATATTTTGTCGCCCATT	JQAP01000014.1 Xylella fastidiosa strain ATCC 35879 contig14, whole genome shotgun sequence
43	379634	379676	CAGGATCTCACGCACCGCCTGACCATGTTTCTTGTGTTCAAGG	JQAP01000014.1 Xylella fastidiosa strain ATCC 35879 contig14, whole genome shotgun sequence
43	379769	379811	CAGTAATTCAGCGATCGCATCAGTCAATTGAATCTCGCCGCCA	JQAP01000014.1 Xylella fastidiosa strain ATCC 35879 contig14, whole genome shotgun sequence
43	383771	383813	GACGATAGGCAATCAGCAACGACGGAATGATCTCCGGAAGATA	JQAP01000014.1 Xylella fastidiosa strain ATCC 35879 contig14, whole genome shotgun sequence
43	384165	384207	GACTGTCTCTGCACGATCCAGTAATCCAGACTTCATGTAATCC	JQAP01000014.1 Xylella fastidiosa strain ATCC 35879 contig14, whole genome shotgun sequence
43	384808	384850	GCCAATGACCAAGCCCACCAGTAGAAAGAGCAACATTATCAGA	JQAP01000014.1 Xylella fastidiosa strain ATCC 35879 contig14, whole genome shotgun sequence
43	384920	384962	TCAGTGATATCTCCACATTCACCTAGAGGTACAACACTTGCCA	JQAP01000014.1 Xylella fastidiosa strain ATCC 35879 contig14, whole genome shotgun sequence
43	385094	385136	CGGATTTCAATGCGATCTCCCCCAGAGAGGGCTCCACCCATCA	JQAP01000014.1 Xylella fastidiosa strain ATCC 35879 contig14, whole genome shotgun sequence
43	389368	389410	CACGCAGCAGCGCATGGCTCACCGTCCGAGATTGCAGGGGAAG	JQAP01000004.1 Xylella fastidiosa strain ATCC 35879 contig4, whole genome shotgun sequence
43	390828	390870	TGAGGTGGCTGTTTCGAGGAGTTGGAAGTCGGATGCGTAGGTT	JQAP01000001.1 Xylella fastidiosa strain ATCC 35879 contig1, whole genome shotgun sequence
43	392865	392907	GACACGGTTACGCCAATCCAAGCGCACAAAAGCAGACACATTA	JQAP01000014.1 Xylella fastidiosa strain ATCC 35879 contig14, whole genome shotgun sequence
43	392920	392962	AGCGTGTAATCCTTCCACTTGTGCTTACCATCACGGCGCTCAA	JQAP01000014.1 Xylella fastidiosa strain ATCC 35879 contig14, whole genome shotgun sequence
43	393957	393999	CACCTGAGTGATAGATGGCAGAGACGCTTGCGCCAAATGGACA	JQAP01000014.1 Xylella fastidiosa strain ATCC 35879 contig14, whole genome shotgun sequence
43	395421	395463	AGAAATATTCTCAAAATCATCGAGAACCTGCTCCTGCTCAGCC	JQAP01000014.1 Xylella fastidiosa strain ATCC 35879 contig14, whole genome shotgun sequence
43	396158	396200	GCGCGCAAACAACTCACGGTAATTCGCGAACGTCACCACAGAA	JQAP01000014.1 Xylella fastidiosa strain ATCC 35879 contig14, whole genome shotgun sequence
43	397533	397575	GCGTACGGCCTCTTCTGCCTGAGCTTGGGTGATGGATGCGTTT	JQAP01000004.1 Xylella fastidiosa strain ATCC 35879 contig4, whole genome shotgun sequence
43	397557	397599	CGGTCGAGACAGATATTCCACCAATCGCCAAGCCGCCTGTTTA	JQAP01000014.1 Xylella fastidiosa strain ATCC 35879 contig14, whole genome shotgun sequence
43	397904	397946	ATATTCATGAAATAGTTTATGGATCGCAAAAGAATAAGCAATC	JQAP01000004.1 Xylella fastidiosa strain ATCC 35879 contig4, whole genome shotgun sequence
43	398036	398078	CGGCCCACGTCGTTAAAGGCGTACGGTACCCAGCGGCCTCCAA	JQAP01000014.1 Xylella fastidiosa strain ATCC 35879 contig14, whole genome shotgun sequence
43	398583	398625	TGCCGAAATACAAGATCGGTCGGTCGCTGCAACACGCAGTGAT	JQAP01000004.1 Xylella fastidiosa strain ATCC 35879 contig4, whole genome shotgun sequence
43	398685	398727	CAGCTAAGCGTAGCGCGAAACCGCACGACCGGAGGCAGTTGCA	JQAP01000004.1 Xylella fastidiosa strain ATCC 35879 contig4, whole genome shotgun sequence
43	399109	399151	CGGCGCCACTGTAGCACAGGGACTGCGTTCGATTGCGATTGGT	JQAP01000004.1 Xylella fastidiosa strain ATCC 35879 contig4, whole genome shotgun sequence
43	399893	399935	GATCCGGAGTCAAGCCATTCATCTCATTCGTCGTGTCCCAAAA	JQAP01000014.1 Xylella fastidiosa strain ATCC 35879 contig14, whole genome shotgun sequence
43	400468	400510	CACATTGCATCCCTATGCCCAGTCAGCCACCTACTGACGACTA	JQAP01000014.1 Xylella fastidiosa strain ATCC 35879 contig14, whole genome shotgun sequence
43	401177	401219	ATCGGCACCACCCTCAACCTCAATCACGTAACACATACAACTT	JQAP01000014.1 Xylella fastidiosa strain ATCC 35879 contig14, whole genome shotgun sequence
43	401497	401539	GAATACCGATGGAAACATCGTTATCAGCAAAGAAAGCGGCAGC	JQAP01000004.1 Xylella fastidiosa strain ATCC 35879 contig4, whole genome shotgun sequence
43	401554	401596	CAATCTGTCCAGCAGTTTGAAGCTGGACAAATTGACCGTTGGC	JQAP01000004.1 Xylella fastidiosa strain ATCC 35879 contig4, whole genome shotgun sequence
43	401859	401901	ATGGTGATGGTGCGACAGGCACTGGGTCTATAGCCGTTGGTGT	JQAP01000004.1 Xylella fastidiosa strain ATCC 35879 contig4, whole genome shotgun sequence
43	402707	402749	CCGTTTTCAACTCAAAGCAGATGTGCATGCTTGGGTCAGCCCG	JQAP01000014.1 Xylella fastidiosa strain ATCC 35879 contig14, whole genome shotgun sequence
43	403441	403483	CGAGACAGCCACAGAAGCACCAAAACTGGAAGAGCGCCTGCAT	JQAP01000014.1 Xylella fastidiosa strain ATCC 35879 contig14, whole genome shotgun sequence
43	404257	404299	ACGCCGTTCAGCCAAAGCCACGCTGCACGTGAATCGCAACGAC	JQAP01000014.1 Xylella fastidiosa strain ATCC 35879 contig14, whole genome shotgun sequence
43	424027	424069	CGCGGAGTTAGTTGCGCGGCTATCCGGTTATCTGGTGCCACGC	JQAP01000014.1 Xylella fastidiosa strain ATCC 35879 contig14, whole genome shotgun sequence
43	424623	424665	GGTCAGTCCGGTGCGTTCGCGTCCAAACAACAACGCGACTTCA	JQAP01000014.1 Xylella fastidiosa strain ATCC 35879 contig14, whole genome shotgun sequence
43	426031	426073	GCAAGCTACAGACAGGGGCTAGGGATAAACAGGAACTGCGGAT	JQAP01000014.1 Xylella fastidiosa strain ATCC 35879 contig14, whole genome shotgun sequence
43	426103	426145	CACAGTGCATGTCCTTGTCTGATTTCTATGTCACCGGCACCGA	JQAP01000014.1 Xylella fastidiosa strain ATCC 35879 contig14, whole genome shotgun sequence
43	430172	430214	AGGTCTTAGGGTGATGGTCATTGATGACTCAAAAACCATAAGA	JQAP01000004.1 Xylella fastidiosa strain ATCC 35879 contig4, whole genome shotgun sequence
43	433328	433370	TGGCTGGGTAAAGCCTGATCTAGATGAAGCTTTGGGCCAAGCA	JQAP01000004.1 Xylella fastidiosa strain ATCC 35879 contig4, whole genome shotgun sequence
43	436847	436889	GCAGATTGTAGCGCGTTACCAACACGAAAAAAGCCTAGTTTCA	JQAP01000004.1 Xylella fastidiosa strain ATCC 35879 contig4, whole genome shotgun sequence
43	438648	438690	AATAGAAGAGGCGCTAGAGACGTTAGATGTGGTGCTGCAGCAG	JQAP01000004.1 Xylella fastidiosa strain ATCC 35879 contig4, whole genome shotgun sequence
43	439647	439689	ACATTGATATGTAAGGAAACTACCTTCAATGAGCTATATCAAC	JQAP01000004.1 Xylella fastidiosa strain ATCC 35879 contig4, whole genome shotgun sequence
43	439836	439878	CGCCTGGAAGGTACCGTTGGTTTCCTTTGCTCGCTTTATCGGC	JQAP01000004.1 Xylella fastidiosa strain ATCC 35879 contig4, whole genome shotgun sequence
43	442525	442567	AGCAATGAAGCCGCCACGAAACGTCCCTAAGGCAAAGCCGAAT	JQAP01000004.1 Xylella fastidiosa strain ATCC 35879 contig4, whole genome shotgun sequence
43	444568	444610	GCCAGTGCTTTTCATTGATTTTTTCGTAGAAAAAATCGCTACC	JQAP01000004.1 Xylella fastidiosa strain ATCC 35879 contig4, whole genome shotgun sequence
43	444711	444753	CCAGCTTTTTCTTTACCGATGGCCTCGCGATCGCTACCTAGCC	JQAP01000004.1 Xylella fastidiosa strain ATCC 35879 contig4, whole genome shotgun sequence
43	446889	446931	GCTGAAAGGTACTCGGTAGTTGCGTAACCCTGGTTGAAAGTTT	JQAP01000004.1 Xylella fastidiosa strain ATCC 35879 contig4, whole genome shotgun sequence
43	446942	446984	AATACTGTCCACCAAACTCTGTGGCATGGACTCACCGGTTTGG	JQAP01000004.1 Xylella fastidiosa strain ATCC 35879 contig4, whole genome shotgun sequence
43	448319	448361	AGCATGTACTAGACCGAAAAAAATTCGTGAGACCCTATCCAAG	JQAP01000004.1 Xylella fastidiosa strain ATCC 35879 contig4, whole genome shotgun sequence
43	460187	460229	CAATACAACTGTTAATCAAAGGGATCACCTACTTGTCTTGGCA	JQAP01000014.1 Xylella fastidiosa strain ATCC 35879 contig14, whole genome shotgun sequence
43	460298	460340	CGGCTATGGTGACCATCACCTTACATTTCAAAAACATCAGTAG	JQAP01000014.1 Xylella fastidiosa strain ATCC 35879 contig14, whole genome shotgun sequence
43	461255	461297	CGACGCCGGTTCTATCACAGCGCAGGCGTCGTCTTATGTATGT	JQAP01000014.1 Xylella fastidiosa strain ATCC 35879 contig14, whole genome shotgun sequence
43	465484	465526	CGAACGCGGCAGAGAGAAAGTGCGCATATCGGATGTGTTTCCG	JQAP01000014.1 Xylella fastidiosa strain ATCC 35879 contig14, whole genome shotgun sequence
43	465664	465706	CATCTCAGTAATGCCGGCATCTAGCAATGCAGGAGCCACACCA	JQAP01000014.1 Xylella fastidiosa strain ATCC 35879 contig14, whole genome shotgun sequence
43	465992	466034	TCAAATGCAAGATAGTCCAGCACGACACCCATCTGACGGCCAA	JQAP01000014.1 Xylella fastidiosa strain ATCC 35879 contig14, whole genome shotgun sequence
43	467829	467871	CGCCGGCTCGGACACAGGCGGTGGCGCAGGCATCCAGGCCGAT	JQAP01000014.1 Xylella fastidiosa strain ATCC 35879 contig14, whole genome shotgun sequence
43	469106	469148	CATCGCTACTGACATTCTGCGGGATCGAATGCGGTATCTTCAG	JQAP01000014.1 Xylella fastidiosa strain ATCC 35879 contig14, whole genome shotgun sequence
43	471347	471389	GGTGCTGAAAATCAGGTATACATCAGATGCCATAAGATCACAG	JQAP01000014.1 Xylella fastidiosa strain ATCC 35879 contig14, whole genome shotgun sequence
43	471468	471510	CCTATTCAGCGATACTTTTGTTACGCCATGAACGTGCCTTCGT	JQAP01000014.1 Xylella fastidiosa strain ATCC 35879 contig14, whole genome shotgun sequence
43	473580	473622	TGATGATGCTTTACTTGCAACCCGTGCAGCCGTTGAAGAAGGA	JQAP01000014.1 Xylella fastidiosa strain ATCC 35879 contig14, whole genome shotgun sequence
43	473615	473657	AGCAATGATTGGATGCAACGCGATCACGCTGCGTTTACCAGTC	JQAP01000004.1 Xylella fastidiosa strain ATCC 35879 contig4, whole genome shotgun sequence
43	474158	474200	GCACACCAGGCAGGCCGGGGGCCATGTTGAGCATGTTGCGCGT	JQAP01000004.1 Xylella fastidiosa strain ATCC 35879 contig4, whole genome shotgun sequence
43	474327	474369	TTCTCATTTAATTTCTTTTGAACAATAGAAAATCCTTGATCAT	JQAP01000014.1 Xylella fastidiosa strain ATCC 35879 contig14, whole genome shotgun sequence
43	474510	474552	TACGCTCAACTGTTGGATGTTAACAGTGGGTTCGGAAATACGA	JQAP01000004.1 Xylella fastidiosa strain ATCC 35879 contig4, whole genome shotgun sequence
43	474652	474694	TGAATTTTAATAGATTACTCGATAGAGCTTTTTAAGCGATTTA	JQAP01000004.1 Xylella fastidiosa strain ATCC 35879 contig4, whole genome shotgun sequence
43	478334	478376	GTAAGTGCGATTCCTTCTACTGATCAGATTCGCAATACTTTTA	JQAP01000004.1 Xylella fastidiosa strain ATCC 35879 contig4, whole genome shotgun sequence
43	478524	478566	TAATTACGTTTCCATTATCAACGCACTCCTGAAGGCCATGGGT	JQAP01000004.1 Xylella fastidiosa strain ATCC 35879 contig4, whole genome shotgun sequence
43	478989	479031	TGCTGATGAAGAGCGTATCACAGAGGCAGCAATTGATGCTGGT	JQAP01000004.1 Xylella fastidiosa strain ATCC 35879 contig4, whole genome shotgun sequence
43	479033	479075	CTGAAGATGTAATGGTCTACATAGAAGATGATGAGATTGAGGT	JQAP01000004.1 Xylella fastidiosa strain ATCC 35879 contig4, whole genome shotgun sequence
43	481011	481053	CATCTTTGGTACTTCATTGTTTTTTGGCGATGGGATCATTACT	JQAP01000004.1 Xylella fastidiosa strain ATCC 35879 contig4, whole genome shotgun sequence
43	481473	481515	TGGGCAAGGTGCATTGGTACTAAGCAATCCCACGGCGATCGGT	JQAP01000004.1 Xylella fastidiosa strain ATCC 35879 contig4, whole genome shotgun sequence
43	481683	481725	ACAGTCCACAATTGGACAAATCTACGTACCAACGGTCAATTGG	JQAP01000004.1 Xylella fastidiosa strain ATCC 35879 contig4, whole genome shotgun sequence
43	483311	483353	ATTATGCCGAGGTTAAGGCGGATGGGCAGATTACAATTGAGGT	JQAP01000004.1 Xylella fastidiosa strain ATCC 35879 contig4, whole genome shotgun sequence
43	483803	483845	GCGAACGATGGGATATGGACAAGAGCGTATGCGTCAAGAGTAC	JQAP01000004.1 Xylella fastidiosa strain ATCC 35879 contig4, whole genome shotgun sequence
43	487045	487087	CAATATCACTTCCGCCCCCATAGCCTTAAGATTAGAAATCTTT	JQAP01000014.1 Xylella fastidiosa strain ATCC 35879 contig14, whole genome shotgun sequence
43	487518	487560	CGAATCGCTTTATCTCTGTCAAGAAGTGGTAATCCTGAAATCT	JQAP01000004.1 Xylella fastidiosa strain ATCC 35879 contig4, whole genome shotgun sequence
43	488501	488543	TAAGAGCCTGCTCAGCATTTTTGCGGGCTATCGCCTCAGCCTC	JQAP01000014.1 Xylella fastidiosa strain ATCC 35879 contig14, whole genome shotgun sequence
43	488533	488575	GGCGAATGGTGCTTCGTCGGGGCAGTTGAACGTTGTTAGTTAC	JQAP01000004.1 Xylella fastidiosa strain ATCC 35879 contig4, whole genome shotgun sequence
43	488626	488668	TAACCGGCGCGTTGAAATCGTTTATACAGCGAAGTAAGCCATG	JQAP01000004.1 Xylella fastidiosa strain ATCC 35879 contig4, whole genome shotgun sequence
43	489033	489075	GCCCTACGCTGCTCCAGCTGAACCTGGAACATAGCTACTTGAC	JQAP01000014.1 Xylella fastidiosa strain ATCC 35879 contig14, whole genome shotgun sequence
43	489261	489303	CTGCTGAAGCTCAGTTTCGCACTTTACTTAGCCGTTATCCAAC	JQAP01000004.1 Xylella fastidiosa strain ATCC 35879 contig4, whole genome shotgun sequence
43	489815	489857	CAGCCGCCACCTCACCGCAGCTGCCCTACTGTCCTCTTTCTCA	JQAP01000014.1 Xylella fastidiosa strain ATCC 35879 contig14, whole genome shotgun sequence
43	489850	489892	AGGTGCGCTCGATATTGCTGCAGTTGATTCACGGGTATCGCGT	JQAP01000004.1 Xylella fastidiosa strain ATCC 35879 contig4, whole genome shotgun sequence
43	490079	490121	AAGCAAGACATAGCACCCACTTTACTCGCTGATTGGATTATTT	JQAP01000004.1 Xylella fastidiosa strain ATCC 35879 contig4, whole genome shotgun sequence
43	490186	490228	ACGCTGAGGTGATTCACTACTCCTTTTGGAAACTGCAAAATAC	JQAP01000004.1 Xylella fastidiosa strain ATCC 35879 contig4, whole genome shotgun sequence
43	490468	490510	GGATTTTCTCATCACTTTCTTTATTAAGGTACTTGTACAACGC	JQAP01000004.1 Xylella fastidiosa strain ATCC 35879 contig4, whole genome shotgun sequence
43	490918	490960	CATCAAACTCTAGTCCTTCTTTTTTCATCAGATGACCAGCCAT	JQAP01000004.1 Xylella fastidiosa strain ATCC 35879 contig4, whole genome shotgun sequence
43	490922	490964	CCAAACCAACCTTAATCTGACTCTGAAAACCGGCCCGATCGAA	JQAP01000014.1 Xylella fastidiosa strain ATCC 35879 contig14, whole genome shotgun sequence
43	491021	491063	CAGCAGCAGCGGTCGCTGGCCGGCAGCCAACCTGTACCACCCG	JQAP01000014.1 Xylella fastidiosa strain ATCC 35879 contig14, whole genome shotgun sequence
43	491496	491538	TGGAACTCGTCTCAAGAAGGCTTGCAACTGACCGCCGCCATAT	JQAP01000014.1 Xylella fastidiosa strain ATCC 35879 contig14, whole genome shotgun sequence
43	494609	494651	AGAAGCCACTGGACTGGAAGTACACATCATCCGCGGCGCAACT	JQAP01000014.1 Xylella fastidiosa strain ATCC 35879 contig14, whole genome shotgun sequence
43	494765	494807	CAAGGTCAGCCTGTCACCCGCAAAGCAGCGTAGGCTTAAATAC	JQAP01000014.1 Xylella fastidiosa strain ATCC 35879 contig14, whole genome shotgun sequence
43	495280	495322	AATTAGGGTAGGAAAGGGTAGAAATTTTAGTGTAATGAACATC	JQAP01000004.1 Xylella fastidiosa strain ATCC 35879 contig4, whole genome shotgun sequence
43	495767	495809	AGTCACGTAACATAGCATCGCTGTCCCATACCAGCCGATCATT	JQAP01000004.1 Xylella fastidiosa strain ATCC 35879 contig4, whole genome shotgun sequence
43	496226	496268	AGTCAGTGGGATAAAGTCTCGAAGGACTCCTGCATGCACGGTG	JQAP01000004.1 Xylella fastidiosa strain ATCC 35879 contig4, whole genome shotgun sequence
43	500335	500377	TGCAGTCAACCGAGTGATCCTATGTCGAGTGCTGGGATTGCCA	JQAP01000004.1 Xylella fastidiosa strain ATCC 35879 contig4, whole genome shotgun sequence
43	502990	503032	ATGGCAGCCAAGTACGCGAAGACGATGTCCTCATCGGCATTGC	JQAP01000014.1 Xylella fastidiosa strain ATCC 35879 contig14, whole genome shotgun sequence
43	537039	537081	CGGTCGCAGACCGCTTCTGAGCGCGTTGTTGGCAGTATCCCGG	JQAP01000014.1 Xylella fastidiosa strain ATCC 35879 contig14, whole genome shotgun sequence
43	564998	565040	CACCGCAACTTGGCATTGTTCGATCGCCTGTAGGGTCTTAAAG	JQAP01000014.1 Xylella fastidiosa strain ATCC 35879 contig14, whole genome shotgun sequence
43	565256	565298	GATGCGCTCTGAATCTTCATTAAATGCCTCGCCAATACTGCGT	JQAP01000014.1 Xylella fastidiosa strain ATCC 35879 contig14, whole genome shotgun sequence
43	565685	565727	GACACCGGGTTGGTCATGTACAAGTGCATCACGCGTCAGCGTC	JQAP01000014.1 Xylella fastidiosa strain ATCC 35879 contig14, whole genome shotgun sequence
43	575030	575072	CTCGTACGCCGGACCAATCCCTCGACCGGTCGTACCAATAGCC	JQAP01000014.1 Xylella fastidiosa strain ATCC 35879 contig14, whole genome shotgun sequence
43	576644	576686	AAAGTAGCGCGCTGGCTCCGTAGCCATCACCTTGAAACGACGA	JQAP01000014.1 Xylella fastidiosa strain ATCC 35879 contig14, whole genome shotgun sequence
43	579290	579332	CAGCATCCAGAGAATCGTCGAGAAACTAGGGCACGAAACAATT	JQAP01000014.1 Xylella fastidiosa strain ATCC 35879 contig14, whole genome shotgun sequence
43	579338	579380	AACCGATGGCAACACCGGGGTAGAGGCAGCCAAAGCACATTTA	JQAP01000014.1 Xylella fastidiosa strain ATCC 35879 contig14, whole genome shotgun sequence
43	594131	594173	TGAACAATTAGCGGGTAACAGCGCAGCCACCGTCGCCAAAACG	JQAP01000014.1 Xylella fastidiosa strain ATCC 35879 contig14, whole genome shotgun sequence
43	609122	609164	GTGCATCAAGCAGGCTCAGTAGGCGTTCTCGCCACTGTGTCGG	JQAP01000014.1 Xylella fastidiosa strain ATCC 35879 contig14, whole genome shotgun sequence
43	609339	609381	CCAGGTGTAGGCGTCGTCAGCTGGGGCTTGGTGTTCGGCACGG	JQAP01000014.1 Xylella fastidiosa strain ATCC 35879 contig14, whole genome shotgun sequence
43	609765	609807	ATGAAGGACCTGGAGTTCACGTAGTCGGGTATGACAGGCGTGA	JQAP01000014.1 Xylella fastidiosa strain ATCC 35879 contig14, whole genome shotgun sequence
43	610416	610458	AGCCTGGTATTTTTCGAATGCTGCACTCAGTGCTTCGGCCAAT	JQAP01000014.1 Xylella fastidiosa strain ATCC 35879 contig14, whole genome shotgun sequence
43	611104	611146	GAATCCGATGATACTTCCAACACCCGCCGTCCAATTGTCCGGT	JQAP01000014.1 Xylella fastidiosa strain ATCC 35879 contig14, whole genome shotgun sequence
43	611804	611846	GCCAGCAACGATGCGCTGGTATACCAGTTTATGCATGGGCAAC	JQAP01000014.1 Xylella fastidiosa strain ATCC 35879 contig14, whole genome shotgun sequence
43	612153	612195	ATCACTGTATCGCGAACTTGCGCCCGTGCTGACTGCTCTGCTT	JQAP01000014.1 Xylella fastidiosa strain ATCC 35879 contig14, whole genome shotgun sequence
43	612322	612364	GCAGCGGTATTGACTGTACCTTTACTCACAGGTGTGTTTTGCT	JQAP01000014.1 Xylella fastidiosa strain ATCC 35879 contig14, whole genome shotgun sequence
43	612691	612733	CAGCGTTTTTCTACGCAAGATATTTAAAGAAATATGAAGTGAA	JQAP01000014.1 Xylella fastidiosa strain ATCC 35879 contig14, whole genome shotgun sequence
43	612742	612784	CTGATCCATCCATATCAGAGTGTTTGTTGGATCAAAAAGTGAG	JQAP01000014.1 Xylella fastidiosa strain ATCC 35879 contig14, whole genome shotgun sequence
43	614143	614185	TGTTGCGCTGCTTGCCGAAGTAATGGAACGTATCCGTGTCCAG	JQAP01000014.1 Xylella fastidiosa strain ATCC 35879 contig14, whole genome shotgun sequence
43	614913	614955	GAAAATTCCGCGCCGCACCGAAAATTTTGGGCAGACTTTGGCA	JQAP01000014.1 Xylella fastidiosa strain ATCC 35879 contig14, whole genome shotgun sequence
43	615044	615086	TTCCGCTGTCCCTATTACGGCAAATCGATAACAACACATGGCG	JQAP01000014.1 Xylella fastidiosa strain ATCC 35879 contig14, whole genome shotgun sequence
43	615156	615198	CGGCGCTGTAGACGATTACGCGCTCACACGGGACGCTTGGTTA	JQAP01000014.1 Xylella fastidiosa strain ATCC 35879 contig14, whole genome shotgun sequence
43	616056	616098	AGTCGACGTCACTTTCAGCTGTATCCACATCCAAGCCATCCAA	JQAP01000014.1 Xylella fastidiosa strain ATCC 35879 contig14, whole genome shotgun sequence
43	617128	617170	TCCCTTCCGCGCGTCTTCGCCCAGTGAGGCAGTCAGCTGATCC	JQAP01000014.1 Xylella fastidiosa strain ATCC 35879 contig14, whole genome shotgun sequence
43	617371	617413	ACAAAGAAGACATCCAAGAATCAGAAAATCAGGTTGCATGTGT	JQAP01000014.1 Xylella fastidiosa strain ATCC 35879 contig14, whole genome shotgun sequence
43	617666	617708	CAAATCAAAACCATAGGCTGTTTACGTACAGCAAACAAAACAG	JQAP01000014.1 Xylella fastidiosa strain ATCC 35879 contig14, whole genome shotgun sequence
43	617742	617784	ACGCACAAATGGCAGTACAAGGGCGGCTACGAGCGCCGCATGT	JQAP01000014.1 Xylella fastidiosa strain ATCC 35879 contig14, whole genome shotgun sequence
43	662934	662976	AACAACCCTAAGGTAGCCTGTAGCAGCTGCACGTCGGCCAACA	JQAP01000014.1 Xylella fastidiosa strain ATCC 35879 contig14, whole genome shotgun sequence
43	663335	663377	TGGTTACAGAGAGTATGGCGGTAAAGCAGCACTCCCCATCTGG	JQAP01000014.1 Xylella fastidiosa strain ATCC 35879 contig14, whole genome shotgun sequence
43	665517	665559	CGGCAATGACACCGACGGCAATATGGCACGCGACATCGCCACA	JQAP01000014.1 Xylella fastidiosa strain ATCC 35879 contig14, whole genome shotgun sequence
43	668467	668509	CGCAACGCTACCGTTACGCACGGAAAATGGTCGAATCAATCAT	JQAP01000014.1 Xylella fastidiosa strain ATCC 35879 contig14, whole genome shotgun sequence
43	668516	668558	CACATTCGGCTTGGAAGCAACACACGAAAGAACCAAACCAAGA	JQAP01000014.1 Xylella fastidiosa strain ATCC 35879 contig14, whole genome shotgun sequence
43	670633	670675	GCGCGGATACAACCCCTGCGACGCAAAGAGAGTCGCAGCCATT	JQAP01000014.1 Xylella fastidiosa strain ATCC 35879 contig14, whole genome shotgun sequence
43	682382	682424	CATCAATCATATTGAAGCCAGTATTGCGATACGGATCGCGATT	JQAP01000014.1 Xylella fastidiosa strain ATCC 35879 contig14, whole genome shotgun sequence
43	682678	682720	AAGGGAAATAGTTGATGCGATCTCAAGAAGTCATACACTCAAT	JQAP01000014.1 Xylella fastidiosa strain ATCC 35879 contig14, whole genome shotgun sequence
43	682982	683024	CAAAAGCCTACGGACATGCCTGTGCATATGGACAACATATTCG	JQAP01000014.1 Xylella fastidiosa strain ATCC 35879 contig14, whole genome shotgun sequence
43	683796	683838	ACAACCACAAGCTATCGCTGGACTGCGTGCGTTCTATCAAGAT	JQAP01000014.1 Xylella fastidiosa strain ATCC 35879 contig14, whole genome shotgun sequence
43	684205	684247	GCTGGCATAGAAGTATTGGCTACCGAGAGCGGATTACCCATTG	JQAP01000014.1 Xylella fastidiosa strain ATCC 35879 contig14, whole genome shotgun sequence
43	686319	686361	GACTGTTAACATAGTCTTCACGTGGCTGGGCTTACTCTGCGCC	JQAP01000014.1 Xylella fastidiosa strain ATCC 35879 contig14, whole genome shotgun sequence
43	686766	686808	CCGCGGCTGGAATCCTTACTTATTGTTAGGAGCGGGGTACCAA	JQAP01000014.1 Xylella fastidiosa strain ATCC 35879 contig14, whole genome shotgun sequence
43	687021	687063	GTTTGGTGATACCTTGGCTTCGATTGGTGTCGTGATCCCATTT	JQAP01000014.1 Xylella fastidiosa strain ATCC 35879 contig14, whole genome shotgun sequence
43	687604	687646	GCTCCATAGCAAAGCCTGGCTTATGCCAGGCTTTGTTTTAGAA	JQAP01000014.1 Xylella fastidiosa strain ATCC 35879 contig14, whole genome shotgun sequence
43	688050	688092	ACTGCACTACCACATCAAACGAAATACTTTCTTTTCTCATGTC	JQAP01000014.1 Xylella fastidiosa strain ATCC 35879 contig14, whole genome shotgun sequence
43	688191	688233	GTGATCAAACGAATAACCAGATCCATTCATGGCGTAGCCAAAG	JQAP01000014.1 Xylella fastidiosa strain ATCC 35879 contig14, whole genome shotgun sequence
43	688590	688632	CTTTTTATTTTGTACCGGATTGCTGGCATACGCGATTTTTCTG	JQAP01000014.1 Xylella fastidiosa strain ATCC 35879 contig14, whole genome shotgun sequence
43	688766	688808	TATTGATATTTCTAACAGCAATAATCGGTACAGGCATCGCTGG	JQAP01000014.1 Xylella fastidiosa strain ATCC 35879 contig14, whole genome shotgun sequence
43	688842	688884	TACAATCTCCTCCTGCGGTTCGCCGTTGAGCTTTCTCAGTGAA	JQAP01000014.1 Xylella fastidiosa strain ATCC 35879 contig14, whole genome shotgun sequence
43	708974	709016	AGCCAAAGTAAGGTTATGGGAATGGTATGCCAAATATGGCGAT	JQAP01000014.1 Xylella fastidiosa strain ATCC 35879 contig14, whole genome shotgun sequence
43	711119	711161	GACCAGTAGCGCATCCGGAGGAAGATAATCGAACAACGTCGGT	JQAP01000014.1 Xylella fastidiosa strain ATCC 35879 contig14, whole genome shotgun sequence
43	711986	712028	GTAAGTCTTCCCAGAACCAGTAACGCCAAGCAACACCTGCTTA	JQAP01000014.1 Xylella fastidiosa strain ATCC 35879 contig14, whole genome shotgun sequence
43	712052	712094	GACTAGCTTCTGTACAGCCGCAGGCTGATCCCCAGAAGGAGAG	JQAP01000014.1 Xylella fastidiosa strain ATCC 35879 contig14, whole genome shotgun sequence
43	712552	712594	CGAGTCGCAAGCCACAACCCATCTCATCAAAAGCCATTTTGTA	JQAP01000014.1 Xylella fastidiosa strain ATCC 35879 contig14, whole genome shotgun sequence
43	719469	719511	ATCCACCTGGAGCAACGACAAAGACAACGTACACCAACGTGGC	JQAP01000014.1 Xylella fastidiosa strain ATCC 35879 contig14, whole genome shotgun sequence
43	720664	720706	TGTGACAGGCACCAGCAACTAATGCATCAGTAATACGAGCGTT	JQAP01000014.1 Xylella fastidiosa strain ATCC 35879 contig14, whole genome shotgun sequence
43	736278	736320	TTAGTCTCTCGCTTAATCGTCACCAGAGTGGAAATACACATCG	JQAP01000014.1 Xylella fastidiosa strain ATCC 35879 contig14, whole genome shotgun sequence
43	737170	737212	AAAACATCAGAACTCCGCCGATACCGGTAATAATGCCGTCCAC	JQAP01000014.1 Xylella fastidiosa strain ATCC 35879 contig14, whole genome shotgun sequence
43	758241	758283	ACTTGAAAAAAGGCACCGAGACAAACCCTGCACCGACCGTACC	JQAP01000014.1 Xylella fastidiosa strain ATCC 35879 contig14, whole genome shotgun sequence
43	758392	758434	ATGCACCACTGAAGAAACACCACACGACGGCCCATGAAGCGCA	JQAP01000014.1 Xylella fastidiosa strain ATCC 35879 contig14, whole genome shotgun sequence
43	758505	758547	TGTACTCATCAACGCCGCACGGTACCGTCCAAGAAGCACATTG	JQAP01000014.1 Xylella fastidiosa strain ATCC 35879 contig14, whole genome shotgun sequence
43	759129	759171	TGCAGCACCACCAACCGAGGGAGCTGAAACCACAGCATCCTTC	JQAP01000014.1 Xylella fastidiosa strain ATCC 35879 contig14, whole genome shotgun sequence
43	761027	761069	ACTGACAACGAAAACATGACCTCCCACATCCCTTCTGACGTTT	JQAP01000014.1 Xylella fastidiosa strain ATCC 35879 contig14, whole genome shotgun sequence
43	766074	766116	CCGGGACACACTCGAACAACTTGAACAAGACATTTTTTCCGAA	JQAP01000014.1 Xylella fastidiosa strain ATCC 35879 contig14, whole genome shotgun sequence
43	766162	766204	GAACTCAACAAAATGCGTCTTATCGTTGCCCCCCTCCAAGACG	JQAP01000014.1 Xylella fastidiosa strain ATCC 35879 contig14, whole genome shotgun sequence
43	767808	767850	GCTGAACTGGGCGGCGGTGGCATTGATGTTGCCGGTGCCTGTT	JQAP01000014.1 Xylella fastidiosa strain ATCC 35879 contig14, whole genome shotgun sequence
42	256	297	CTGTACATAGCCAGTGGCGGCTGCGACACCAGCATCCACAAA	JQAP01000004.1 Xylella fastidiosa strain ATCC 35879 contig4, whole genome shotgun sequence
42	4221	4262	CTTCTCTGTTGATGTGTTAGTTGGAGTTATTGGGTTTTAAGT	JQAP01000001.1 Xylella fastidiosa strain ATCC 35879 contig1, whole genome shotgun sequence
42	7992	8033	CAGCTCTTATAAAGAATCGAGAATTGATGAAAAAATTATCGT	JQAP01000001.1 Xylella fastidiosa strain ATCC 35879 contig1, whole genome shotgun sequence
42	9317	9358	CAAGATTACGGCGGGCATTCCCTTTAGTTGATTTAAGCCTAT	JQAP01000008.1 Xylella fastidiosa strain ATCC 35879 contig8, whole genome shotgun sequence
42	23345	23386	CAATTCCGTACATAACTCCGCTGCCGCGTATTGGACCATTGG	JQAP01000014.1 Xylella fastidiosa strain ATCC 35879 contig14, whole genome shotgun sequence
42	33511	33552	CATTATATGGTGACAATGTGTGTAACAGTACCTGCAAGATGT	JQAP01000002.1 Xylella fastidiosa strain ATCC 35879 contig2, whole genome shotgun sequence
42	34576	34617	CCATTTTCAGCCTCAGCCACAACCTCTAAATGTTGCATTTGT	JQAP01000014.1 Xylella fastidiosa strain ATCC 35879 contig14, whole genome shotgun sequence
42	34918	34959	GTAAATGTCCGCTGAAGAGAATCGCGCAAAAGCACTTTGAAA	JQAP01000002.1 Xylella fastidiosa strain ATCC 35879 contig2, whole genome shotgun sequence
42	41966	42007	CCGTTAGGTCCGCCTGATAATGCAGTCCATGAAACACTCCTT	JQAP01000012.1 Xylella fastidiosa strain ATCC 35879 contig12, whole genome shotgun sequence
42	43096	43137	ACACAATCGCACTACAAACCCCAACGCTGTTTGTGCAAATCA	JQAP01000015.1 Xylella fastidiosa strain ATCC 35879 contig15, whole genome shotgun sequence
42	43729	43770	CGCTGTTCCGTTGACGACAACGCCGACGATTGAGACCAGAAG	JQAP01000015.1 Xylella fastidiosa strain ATCC 35879 contig15, whole genome shotgun sequence
42	48240	48281	ATCCCCACTTTCAGCCCGCATGAATACGCCAACATCACGAAC	JQAP01000014.1 Xylella fastidiosa strain ATCC 35879 contig14, whole genome shotgun sequence
42	53706	53747	TGGACTTATTGACCACAATCGTCGGCCTATCAATGCACTGAC	JQAP01000014.1 Xylella fastidiosa strain ATCC 35879 contig14, whole genome shotgun sequence
42	58499	58540	GGGGAGGGTCTGTGAGGATGCGGGTCAGGTATTCAAGTGCTG	JQAP01000016.1 Xylella fastidiosa strain ATCC 35879 contig16, whole genome shotgun sequence
42	60803	60844	TCGGTCACTGGTTGATCAGGCGCACCAGAAGTGAGTATTTGA	JQAP01000016.1 Xylella fastidiosa strain ATCC 35879 contig16, whole genome shotgun sequence
42	64345	64386	TGAATAAATTATGAAGAGAGGCGTTTTTATTAAAATTTAAAT	JQAP01000001.1 Xylella fastidiosa strain ATCC 35879 contig1, whole genome shotgun sequence
42	66433	66474	TGATGATTTGTCTCTCATTTGTGATGATCATGCAGTTGTTTG	JQAP01000004.1 Xylella fastidiosa strain ATCC 35879 contig4, whole genome shotgun sequence
42	70746	70787	GCCACACGCGACACGGTGGCTGACATGATTCTGCCGGCAAAG	JQAP01000014.1 Xylella fastidiosa strain ATCC 35879 contig14, whole genome shotgun sequence
42	77544	77585	ACAAATACTTCCTTGTTAGCACGTCCGGCGTTGGCCGATGGT	JQAP01000012.1 Xylella fastidiosa strain ATCC 35879 contig12, whole genome shotgun sequence
42	78254	78295	TCGCGTTTTAAATGTGCATCTCTCAGGGAGGGTGTGATTGGT	JQAP01000012.1 Xylella fastidiosa strain ATCC 35879 contig12, whole genome shotgun sequence
42	81380	81421	TCAAGCCACAACGGCGAAATCTTCTCTTCACCAAGGACGGCC	JQAP01000015.1 Xylella fastidiosa strain ATCC 35879 contig15, whole genome shotgun sequence
42	87999	88040	CGCCCTTGCCTAAGTAACGCCGTGCTGCAGCCTGCACGCCAT	JQAP01000012.1 Xylella fastidiosa strain ATCC 35879 contig12, whole genome shotgun sequence
42	91719	91760	TCCACCACGTCGTCAAGGTAATCAACGGTCTTCTCCTTGAGT	JQAP01000004.1 Xylella fastidiosa strain ATCC 35879 contig4, whole genome shotgun sequence
42	92718	92759	GCTGCCTTGTCGTTCATCGTCTTGATGTAGTTGAAGATGAAC	JQAP01000004.1 Xylella fastidiosa strain ATCC 35879 contig4, whole genome shotgun sequence
42	93017	93058	ATGTTCGTTCAGTACAACTCCGCGTATTGATCGATTATTGAT	JQAP01000004.1 Xylella fastidiosa strain ATCC 35879 contig4, whole genome shotgun sequence
42	95397	95438	ATGGCGTGGCCGAAGGTATGACCGAGATTGAGCAGGACGCGT	JQAP01000004.1 Xylella fastidiosa strain ATCC 35879 contig4, whole genome shotgun sequence
42	104199	104240	CAATTGCCTATGGGGTTGCTGTGAGAGAAGGAGTGTGCTATC	JQAP01000001.1 Xylella fastidiosa strain ATCC 35879 contig1, whole genome shotgun sequence
42	105028	105069	GTACGTTGCTGGCTCATAGGAGGAAGTCTGAAAAAATGAAGC	JQAP01000015.1 Xylella fastidiosa strain ATCC 35879 contig15, whole genome shotgun sequence
42	106749	106790	TGGCGTGCCGATGCTGATTCTAGATACTGAGCGGCCCGATGT	JQAP01000002.1 Xylella fastidiosa strain ATCC 35879 contig2, whole genome shotgun sequence
42	109725	109766	ATGGCCGGAAACCCAGATCGAGCATTGCCCCACCTACGTCAA	JQAP01000014.1 Xylella fastidiosa strain ATCC 35879 contig14, whole genome shotgun sequence
42	112763	112804	CGACGAACCTCCGGAAGAGACCAGCGGCAACGTCAAACCCTT	JQAP01000015.1 Xylella fastidiosa strain ATCC 35879 contig15, whole genome shotgun sequence
42	114448	114489	TAAGAGTGCCTCAAAATACGGGAGTTCTTGGGGTGCCAGATT	JQAP01000002.1 Xylella fastidiosa strain ATCC 35879 contig2, whole genome shotgun sequence
42	119269	119310	TGGGTTCGTTCTAAGATGAGTCGTGAGTTGATTGATTGGCTG	JQAP01000002.1 Xylella fastidiosa strain ATCC 35879 contig2, whole genome shotgun sequence
42	122956	122997	ATTGCCGGCCGCACACTCCCCAAAACATGAACACGCGCTGGT	JQAP01000014.1 Xylella fastidiosa strain ATCC 35879 contig14, whole genome shotgun sequence
42	124856	124897	GATCACGATCAATCGCCGGAGGCCAAAAAACCAACCGATCAA	JQAP01000014.1 Xylella fastidiosa strain ATCC 35879 contig14, whole genome shotgun sequence
42	148895	148936	TAAAAATGCAGCCTCTGTTGGTAAGCCTAATGTGAGATTTCC	JQAP01000002.1 Xylella fastidiosa strain ATCC 35879 contig2, whole genome shotgun sequence
42	154295	154336	TCATGTTAAGCCTGGTGATGTGGTTGCTCTCTCTCAGAGAGC	JQAP01000002.1 Xylella fastidiosa strain ATCC 35879 contig2, whole genome shotgun sequence
42	154964	155005	TTTGACTAAAGACACTACAATTAATATGCGTTTGAAAATTGA	JQAP01000002.1 Xylella fastidiosa strain ATCC 35879 contig2, whole genome shotgun sequence
42	166345	166386	TAGCGACTTTAGAAAAGCAACCCATTGTTATCCGGCCAAGCC	JQAP01000015.1 Xylella fastidiosa strain ATCC 35879 contig15, whole genome shotgun sequence
42	167270	167311	AATTAACCTAGCACATTGATAACAGATCGGTGCATGTTGCAA	JQAP01000015.1 Xylella fastidiosa strain ATCC 35879 contig15, whole genome shotgun sequence
42	168411	168452	CGGCGACAATCCCGACGATACTCAAGACCTACTCTCAATGCT	JQAP01000015.1 Xylella fastidiosa strain ATCC 35879 contig15, whole genome shotgun sequence
42	168654	168695	GATGCGTCGCCAAGCTGCGGAGGGTGACTTTCGTTCCAACCT	JQAP01000015.1 Xylella fastidiosa strain ATCC 35879 contig15, whole genome shotgun sequence
42	172166	172207	CGCTGCAACCAAGGGTATCCAATGCGACCACCAGCCTCGGCC	JQAP01000015.1 Xylella fastidiosa strain ATCC 35879 contig15, whole genome shotgun sequence
42	177271	177312	CCACTATAACTGCCATCGGTGCCAGCGCCTCCCTTGCGCCAA	JQAP01000014.1 Xylella fastidiosa strain ATCC 35879 contig14, whole genome shotgun sequence
42	184605	184646	CCAACGGATATCTGTAAAACTAGATAGATCTTTGGTCGCCGA	JQAP01000001.1 Xylella fastidiosa strain ATCC 35879 contig1, whole genome shotgun sequence
42	187947	187988	CAATATGGCTGCTCACCAACGAGTTGTATCGTAAAATCTCTT	JQAP01000001.1 Xylella fastidiosa strain ATCC 35879 contig1, whole genome shotgun sequence
42	195590	195631	TGCATTACTGTTGGAGACTGGTAATACCAAAGTTGCGCCGCC	JQAP01000004.1 Xylella fastidiosa strain ATCC 35879 contig4, whole genome shotgun sequence
42	206980	207021	AGAATTAGCTAGAAATTTACGCGTTGCTGGTGTACGGAGGGG	JQAP01000004.1 Xylella fastidiosa strain ATCC 35879 contig4, whole genome shotgun sequence
42	215992	216033	AGATTCGGCGAGGCCAGGGTACGTATCCAATACAACAACGGC	JQAP01000015.1 Xylella fastidiosa strain ATCC 35879 contig15, whole genome shotgun sequence
42	222711	222752	CCGCCATCTTGCCTTGTTCTCGGGATGGCTGATTGCGTTGGC	JQAP01000015.1 Xylella fastidiosa strain ATCC 35879 contig15, whole genome shotgun sequence
42	233487	233528	CATCCAGCTAATGTCACCAGGACCATCAGCGTACACACTAAA	JQAP01000014.1 Xylella fastidiosa strain ATCC 35879 contig14, whole genome shotgun sequence
42	245020	245061	TGATTCTGCACGCCGTTTTGCTGGTCAAATGCACCTGACGGC	JQAP01000001.1 Xylella fastidiosa strain ATCC 35879 contig1, whole genome shotgun sequence
42	248775	248816	TCGTATGAGATGCGGTATTGGATTCGCTCATGCTGCGTTAGG	JQAP01000004.1 Xylella fastidiosa strain ATCC 35879 contig4, whole genome shotgun sequence
42	252334	252375	CACATGAGCACAGAAAAACGCCGTTGTTTTTGATGTCGTTTG	JQAP01000014.1 Xylella fastidiosa strain ATCC 35879 contig14, whole genome shotgun sequence
42	252390	252431	CGCAGAACGACAAATCATTAGGTTTTACAAAAAACAACGAAG	JQAP01000015.1 Xylella fastidiosa strain ATCC 35879 contig15, whole genome shotgun sequence
42	254346	254387	GCTGTCGCTGCACCGATCAGCACAAATGGAATGCTGGCTACG	JQAP01000001.1 Xylella fastidiosa strain ATCC 35879 contig1, whole genome shotgun sequence
42	261198	261239	TAACGCCATCGACGCAGTGCATCCGCTGACCAGCACCTTCGG	JQAP01000014.1 Xylella fastidiosa strain ATCC 35879 contig14, whole genome shotgun sequence
42	273082	273123	ATCCACGCTGAGTGCAGTCCGAACCATATCTAAATCGGTGAC	JQAP01000014.1 Xylella fastidiosa strain ATCC 35879 contig14, whole genome shotgun sequence
42	286617	286658	TTTTTGTTTTCATCAGGATTTAATTTACCGATTTGAGCCAAG	JQAP01000015.1 Xylella fastidiosa strain ATCC 35879 contig15, whole genome shotgun sequence
42	287282	287323	CAACAATTCAACCCTATCGCCATCGTTCAACACATGGTCTGA	JQAP01000014.1 Xylella fastidiosa strain ATCC 35879 contig14, whole genome shotgun sequence
42	300334	300375	ACCAATACAATTAATGGAGTTGCCTGCGCACAAGCAAATGCA	JQAP01000014.1 Xylella fastidiosa strain ATCC 35879 contig14, whole genome shotgun sequence
42	305941	305982	TGTGTTTTGTTGAGGGAAGCGGTTATCTCCCCGGCACAGGTC	JQAP01000004.1 Xylella fastidiosa strain ATCC 35879 contig4, whole genome shotgun sequence
42	308472	308513	CGACCATTGACACTAATATTACCTGACCCTTTACGTAGAAAT	JQAP01000004.1 Xylella fastidiosa strain ATCC 35879 contig4, whole genome shotgun sequence
42	308696	308737	CAATACACGTAAATAATCAACAAGATTCAGACCCAATGGTTC	JQAP01000014.1 Xylella fastidiosa strain ATCC 35879 contig14, whole genome shotgun sequence
42	310838	310879	ATGTCGGCTGATCCTGGAATAAGAGAGAAGCGGGAAGAAGAA	JQAP01000004.1 Xylella fastidiosa strain ATCC 35879 contig4, whole genome shotgun sequence
42	321712	321753	GGCACTACGTCGAACATGACACGATAGCCACGGATCTCATGC	JQAP01000015.1 Xylella fastidiosa strain ATCC 35879 contig15, whole genome shotgun sequence
42	329958	329999	GCAACAGCCGCTCAGCACAAATGGCTGAATTACTCACCGCCA	JQAP01000015.1 Xylella fastidiosa strain ATCC 35879 contig15, whole genome shotgun sequence
42	332626	332667	GAATCAAGTTAGTCCAACACTCTAATAGATAAAATTCCACAA	JQAP01000015.1 Xylella fastidiosa strain ATCC 35879 contig15, whole genome shotgun sequence
42	333318	333359	TGACTGGATTGCTGCACTTTAATAACGCACCGCGTGACAACA	JQAP01000014.1 Xylella fastidiosa strain ATCC 35879 contig14, whole genome shotgun sequence
42	337174	337215	CCCACGGATGCTGCGTACCAGCTCTAACTGTACGTCGAAGGG	JQAP01000004.1 Xylella fastidiosa strain ATCC 35879 contig4, whole genome shotgun sequence
42	343703	343744	CTATTTGATCAACTGCGGGATATGATCCGCGACAGCATCCAA	JQAP01000014.1 Xylella fastidiosa strain ATCC 35879 contig14, whole genome shotgun sequence
42	356238	356279	GCATCGTCATGGGGCAAGCGGTAAGCCGGTATACGGTATGAA	JQAP01000004.1 Xylella fastidiosa strain ATCC 35879 contig4, whole genome shotgun sequence
42	358025	358066	AGTGAGAGCTTGGTGTTGCCGTAACGACGCATGAGTCACGTG	JQAP01000004.1 Xylella fastidiosa strain ATCC 35879 contig4, whole genome shotgun sequence
42	372706	372747	GACTTCGACATGAATGAAGAGAAGGAGGATGGGTCATTGGAA	JQAP01000004.1 Xylella fastidiosa strain ATCC 35879 contig4, whole genome shotgun sequence
42	373884	373925	GACCGCTGCGACGCAGTTATAGATGTGAGAGACCTGTGCCCC	JQAP01000014.1 Xylella fastidiosa strain ATCC 35879 contig14, whole genome shotgun sequence
42	381820	381861	AATTCAAAGGTGAAGGCAGCAGTGTTTGCTTCCCGCTCATGT	JQAP01000004.1 Xylella fastidiosa strain ATCC 35879 contig4, whole genome shotgun sequence
42	447192	447233	GCAGGCTTAGTAAAGTTGCAAACGTTGTAGACCACGGGTTTG	JQAP01000004.1 Xylella fastidiosa strain ATCC 35879 contig4, whole genome shotgun sequence
42	489948	489989	ATCTGACGTTACTAACCCCCAACGACCAAATCAAGTTTGTGC	JQAP01000004.1 Xylella fastidiosa strain ATCC 35879 contig4, whole genome shotgun sequence
42	592940	592981	AGAACGTAAGCGAAAGGCTGCAGCAGCTGTAAAGCGCAATAT	JQAP01000014.1 Xylella fastidiosa strain ATCC 35879 contig14, whole genome shotgun sequence
42	665473	665514	GCGGCTTGCCGCGCTGGTGCGCGCACCTATTTCATATGCGCA	JQAP01000014.1 Xylella fastidiosa strain ATCC 35879 contig14, whole genome shotgun sequence
42	685575	685616	CCATCACATCGGATGCATTGAATTTTATTACGCCTCCTAAAA	JQAP01000014.1 Xylella fastidiosa strain ATCC 35879 contig14, whole genome shotgun sequence
42	748435	748476	AAACTCATCAAACTGGATGGGAAAAAATTCGAGCAATTCACT	JQAP01000014.1 Xylella fastidiosa strain ATCC 35879 contig14, whole genome shotgun sequence
42	766647	766688	CAACTGAAATTAATACTGACGCCGCAAATACCCAAAGCACTC	JQAP01000014.1 Xylella fastidiosa strain ATCC 35879 contig14, whole genome shotgun sequence
41	3056	3096	ATCGCAAGCTGGCGGCTCGACTGCATGAGGCGCTACAATCT	JQAP01000002.1 Xylella fastidiosa strain ATCC 35879 contig2, whole genome shotgun sequence
41	12056	12096	TAAGATCAATAAAGACAAACGCGGCAGCTTGCGTTGGCAGC	JQAP01000002.1 Xylella fastidiosa strain ATCC 35879 contig2, whole genome shotgun sequence
41	35145	35185	GCGTAAACGGGTCAGGTAGGCGGCAGTTTCAATGGTGGCTG	JQAP01000016.1 Xylella fastidiosa strain ATCC 35879 contig16, whole genome shotgun sequence
41	40298	40338	CACGTTGATCAGTGGTATCAGCAACAGGGGTTTGGTATGAA	JQAP01000004.1 Xylella fastidiosa strain ATCC 35879 contig4, whole genome shotgun sequence
41	50017	50057	CCTTAGTTGCCTTGCTTATTTTTGTGTGTTGGGCTGGTGAT	JQAP01000004.1 Xylella fastidiosa strain ATCC 35879 contig4, whole genome shotgun sequence
41	58056	58096	CGCAATACCGGCACCCGGGCTGGTGATGAAGTCGTGCAACT	JQAP01000015.1 Xylella fastidiosa strain ATCC 35879 contig15, whole genome shotgun sequence
41	60305	60345	TTTAGTTCCAGTGTGTCAGTGAATTGATCGGTAAGTTCCTT	JQAP01000016.1 Xylella fastidiosa strain ATCC 35879 contig16, whole genome shotgun sequence
41	61946	61986	CGTTGTCCATTGTTTTTCTTTTCGGGGTGGGGTATTGCGAG	JQAP01000001.1 Xylella fastidiosa strain ATCC 35879 contig1, whole genome shotgun sequence
41	65851	65891	TTTTTTGCCTTTGGGCACATAATTTTAAGTGAAGAGTTTGA	JQAP01000001.1 Xylella fastidiosa strain ATCC 35879 contig1, whole genome shotgun sequence
41	72796	72836	GCCTTTGGGTACGTTAGTCTCTCTTTATAATCCCAAGCCTG	JQAP01000004.1 Xylella fastidiosa strain ATCC 35879 contig4, whole genome shotgun sequence
41	92273	92313	TGCTGCGCCTTTGATGCGTGGTTGCCCTTGTTGTGCTTGAG	JQAP01000004.1 Xylella fastidiosa strain ATCC 35879 contig4, whole genome shotgun sequence
41	93297	93337	GTGTACTCGCGTTGATACGCAGGGATGATGAAGTCGCCATT	JQAP01000004.1 Xylella fastidiosa strain ATCC 35879 contig4, whole genome shotgun sequence
41	93349	93389	TGGCCAAAAGCTCTACGGAATATTCCGTGAGATAAAACTCG	JQAP01000004.1 Xylella fastidiosa strain ATCC 35879 contig4, whole genome shotgun sequence
41	105834	105874	TTTGAAGCAGCCGATAGCCTGTTTGATTATCCCCACTACAC	JQAP01000001.1 Xylella fastidiosa strain ATCC 35879 contig1, whole genome shotgun sequence
41	112421	112461	GAGTAGGCGTACCGAGAACAGCGATATGCCTGGCTTGTGGG	JQAP01000002.1 Xylella fastidiosa strain ATCC 35879 contig2, whole genome shotgun sequence
41	120061	120101	CAATGGCGGATCGGTGTTGATTTGGCTAAGAGTGTGCCTGA	JQAP01000002.1 Xylella fastidiosa strain ATCC 35879 contig2, whole genome shotgun sequence
41	120505	120545	CATAGAAAAATAGGCGGCCAGACGGATCCTTCAATCCCCCC	JQAP01000014.1 Xylella fastidiosa strain ATCC 35879 contig14, whole genome shotgun sequence
41	154708	154748	TGCTTTCTTCGATTCCGGGATTCGCGATTACAGAAGTGGAA	JQAP01000002.1 Xylella fastidiosa strain ATCC 35879 contig2, whole genome shotgun sequence
41	156094	156134	TGTTTTAAGTTGTCATGTTATCGTTGATGGTGTTTTTTAGT	JQAP01000002.1 Xylella fastidiosa strain ATCC 35879 contig2, whole genome shotgun sequence
41	157295	157335	GGTATTTCGTGAAGGGATAGCGATGTGTATCGGAGTCAAAT	JQAP01000004.1 Xylella fastidiosa strain ATCC 35879 contig4, whole genome shotgun sequence
41	159846	159886	GGTAAATACTCGGGCAATTGAACGTGAATCAATGACCCTGG	JQAP01000015.1 Xylella fastidiosa strain ATCC 35879 contig15, whole genome shotgun sequence
41	161758	161798	TCGCTAGTGAAACTCTGCCTAGGTATTGGTGGTGGTGGCTC	JQAP01000004.1 Xylella fastidiosa strain ATCC 35879 contig4, whole genome shotgun sequence
41	162070	162110	GGGAGAGTGATGATCAATCGCGGCTCTGGTAGCAATGATGG	JQAP01000002.1 Xylella fastidiosa strain ATCC 35879 contig2, whole genome shotgun sequence
41	167005	167045	TTTAGTCAAAGTTCAACGTAAATAGGCATCGCGATATCACA	JQAP01000015.1 Xylella fastidiosa strain ATCC 35879 contig15, whole genome shotgun sequence
41	169323	169363	GGCAGGTTTCGATCCGACTTCTCCTGATCTGCATTTGGGGC	JQAP01000001.1 Xylella fastidiosa strain ATCC 35879 contig1, whole genome shotgun sequence
41	171035	171075	TTTTTTGCCTTTGGGCACATAATTTTAAGTGAAGAGTTTGA	JQAP01000001.1 Xylella fastidiosa strain ATCC 35879 contig1, whole genome shotgun sequence
41	171666	171706	TGCTTTTGCTGGTCTAGATAAAGTGATCCAACAGCGTTGCA	JQAP01000002.1 Xylella fastidiosa strain ATCC 35879 contig2, whole genome shotgun sequence
41	188008	188048	CACTGTAACCGCCGTAGGTTTACCTTTGACCCGCTTACCCG	JQAP01000001.1 Xylella fastidiosa strain ATCC 35879 contig1, whole genome shotgun sequence
41	190726	190766	ACTCAATGACTGCAGCGGTGGCGCCAGCGTCCAGGTGATCG	JQAP01000001.1 Xylella fastidiosa strain ATCC 35879 contig1, whole genome shotgun sequence
41	199617	199657	TGTCTTTCAGATTGAAATTCGTCGTATGTGGATATGGATAT	JQAP01000001.1 Xylella fastidiosa strain ATCC 35879 contig1, whole genome shotgun sequence
41	199689	199729	AGGGTGGAGATTTTTTGTTGAAGTAGTTGTGTGATGAACAG	JQAP01000001.1 Xylella fastidiosa strain ATCC 35879 contig1, whole genome shotgun sequence
41	199951	199991	AGTCTCGAAGTGCAGCCCCGGTAATGCTGCGCCGCCCCAGT	JQAP01000004.1 Xylella fastidiosa strain ATCC 35879 contig4, whole genome shotgun sequence
41	214646	214686	GCGAAGCACTGATCTGAGAAACTTCATTGCCCAGTGAAGTG	JQAP01000002.1 Xylella fastidiosa strain ATCC 35879 contig2, whole genome shotgun sequence
41	232536	232576	GCATTTATCACAAAGAAGCACCACGCCGTGTAGGAATAAGG	JQAP01000014.1 Xylella fastidiosa strain ATCC 35879 contig14, whole genome shotgun sequence
41	243266	243306	TTTCCTTTGCTATTGCGTGTTGCATCGAAGTTGCCTAGGTG	JQAP01000004.1 Xylella fastidiosa strain ATCC 35879 contig4, whole genome shotgun sequence
41	249398	249438	TTTTCAGTTTCAATTGATCTTTAACTACTAAAAATATGATG	JQAP01000004.1 Xylella fastidiosa strain ATCC 35879 contig4, whole genome shotgun sequence
41	250002	250042	GGGTATTAAGAGGAGCCATAATTTCCTCCAGTCCATTGCAA	JQAP01000004.1 Xylella fastidiosa strain ATCC 35879 contig4, whole genome shotgun sequence
41	250094	250134	CGGCATGCTGACCCTTGGCATACCAAGCTCACCAGGGGTGC	JQAP01000014.1 Xylella fastidiosa strain ATCC 35879 contig14, whole genome shotgun sequence
41	254770	254810	TGCTGCTGTCGCCGATCCGCGTAGTTCGCCAGCGTATTCTG	JQAP01000004.1 Xylella fastidiosa strain ATCC 35879 contig4, whole genome shotgun sequence
41	260921	260961	AAAGAGGGGATGCAGTGATGTAGGTGTGTGTCATTAGGCAC	JQAP01000001.1 Xylella fastidiosa strain ATCC 35879 contig1, whole genome shotgun sequence
41	263956	263996	TATCCATATCCATAAAATATATTACCGTAGTATTTATATCC	JQAP01000014.1 Xylella fastidiosa strain ATCC 35879 contig14, whole genome shotgun sequence
41	290148	290188	CCTTCTAAAATACCCCTTGTAGTGTTCTTTGAACTAATATA	JQAP01000014.1 Xylella fastidiosa strain ATCC 35879 contig14, whole genome shotgun sequence
41	315050	315090	CACTTAATTAATTTGAATTCTAAAATGGAAAACGATTAATA	JQAP01000014.1 Xylella fastidiosa strain ATCC 35879 contig14, whole genome shotgun sequence
41	316366	316406	TTGCATAAGCCTGATGCAATCATTGTCTAAATGAAGTGGCA	JQAP01000004.1 Xylella fastidiosa strain ATCC 35879 contig4, whole genome shotgun sequence
41	317558	317598	CAGTTCAACGGAATCCGAGCCTGATGCCAGGATCACGTTGG	JQAP01000004.1 Xylella fastidiosa strain ATCC 35879 contig4, whole genome shotgun sequence
41	364268	364308	ATTTTGTCGGAGGAGACTGTGGATGCCATTTCCAATGCAAT	JQAP01000004.1 Xylella fastidiosa strain ATCC 35879 contig4, whole genome shotgun sequence
41	385378	385418	TACCCAATTTTGTAGTACCGCCGGAAGAAGATTGATATTCC	JQAP01000014.1 Xylella fastidiosa strain ATCC 35879 contig14, whole genome shotgun sequence
41	398733	398773	ATTCCAGACGAAATCATTACGATAATTAGCAATCATGCTAA	JQAP01000014.1 Xylella fastidiosa strain ATCC 35879 contig14, whole genome shotgun sequence
41	432028	432068	GTTGGCTCGGTACGTGATAAACGTATTTTCCCCAATTTCTG	JQAP01000004.1 Xylella fastidiosa strain ATCC 35879 contig4, whole genome shotgun sequence
41	464387	464427	GCCACTACAAAACGTGCAAAGTTTGAAGAAATAAACCAACG	JQAP01000014.1 Xylella fastidiosa strain ATCC 35879 contig14, whole genome shotgun sequence
41	468486	468526	GCATCAAGCCTGCAAAGCAGGCATTGACTACGTTGCACGCG	JQAP01000014.1 Xylella fastidiosa strain ATCC 35879 contig14, whole genome shotgun sequence
41	481867	481907	GTGCCGCGTCTGATGCTGTTGATGATTGCTATTGTGTTCAT	JQAP01000004.1 Xylella fastidiosa strain ATCC 35879 contig4, whole genome shotgun sequence
41	492258	492298	TGCGCCAAGAACTCGGGCAAGAGATCCTTGATGCACTGGCA	JQAP01000014.1 Xylella fastidiosa strain ATCC 35879 contig14, whole genome shotgun sequence
41	522434	522474	TCAGATGAAGTTCGACCAGGACACCATCAAAATCGCAGCCG	JQAP01000014.1 Xylella fastidiosa strain ATCC 35879 contig14, whole genome shotgun sequence
41	593643	593683	AAACACCTGTCTCAGTAATCCCCTCGCCCTCCAAGCCGCTA	JQAP01000014.1 Xylella fastidiosa strain ATCC 35879 contig14, whole genome shotgun sequence
41	613991	614031	AAGCTACATCGCGACGGTAACTCACTGGTGTTAAGCGGCCC	JQAP01000014.1 Xylella fastidiosa strain ATCC 35879 contig14, whole genome shotgun sequence
41	682627	682667	AAGCCAACACAAGATTGCTACTAAGACACTTGTCATCACAG	JQAP01000014.1 Xylella fastidiosa strain ATCC 35879 contig14, whole genome shotgun sequence
41	685315	685355	TCACAAGCATTACGAAGTATTTCGTGCAATAAACCGCATGA	JQAP01000014.1 Xylella fastidiosa strain ATCC 35879 contig14, whole genome shotgun sequence
41	688288	688328	ATCTACTACATCAATGAAATTAATAATAAAAATAAATAATT	JQAP01000014.1 Xylella fastidiosa strain ATCC 35879 contig14, whole genome shotgun sequence
41	767074	767114	CACCCAAATCGACTTAGAACTGGCAAAGATTGACGCTTTCG	JQAP01000014.1 Xylella fastidiosa strain ATCC 35879 contig14, whole genome shotgun sequence
40	6194	6233	TCACAACGCGTTTGATATAAGCGGTGTCCTGTTGTTGTTC	JQAP01000004.1 Xylella fastidiosa strain ATCC 35879 contig4, whole genome shotgun sequence
40	8355	8394	TGGTGTTGCGTCCATTGAGTAGTATCGCCAGGATGCGTCG	JQAP01000002.1 Xylella fastidiosa strain ATCC 35879 contig2, whole genome shotgun sequence
40	12207	12246	GTCGTTTCCACCAATGGCCACACATCTGGAGGCTCCATCG	JQAP01000009.1 Xylella fastidiosa strain ATCC 35879 contig9, whole genome shotgun sequence
40	15496	15535	TGCTACGGCTGTCCGTATTTACCGACGAAGAAAAAGAAAA	JQAP01000012.1 Xylella fastidiosa strain ATCC 35879 contig12, whole genome shotgun sequence
40	36792	36831	CCCCCCTACATAGGGGGGCAAATATGGCGTCCCCACGGGG	JQAP01000002.1 Xylella fastidiosa strain ATCC 35879 contig2, whole genome shotgun sequence
40	44612	44651	ACCGGCGATGCCGATGATTTCGCCCACAGATGCTTCTACC	JQAP01000001.1 Xylella fastidiosa strain ATCC 35879 contig1, whole genome shotgun sequence
40	45160	45199	GGGGAAGTGTTTGAGGAAGAGTGCGGTAAGCAGGGTGGCG	JQAP01000004.1 Xylella fastidiosa strain ATCC 35879 contig4, whole genome shotgun sequence
40	53898	53937	AACTGTGCAAATTCGCTTTTCGCCTCGTCTTCGTGGTGTT	JQAP01000004.1 Xylella fastidiosa strain ATCC 35879 contig4, whole genome shotgun sequence
40	60066	60105	TCATACCCAGCTGCTTTGTAGCAGAATCTTCTGGTTGAAG	JQAP01000016.1 Xylella fastidiosa strain ATCC 35879 contig16, whole genome shotgun sequence
40	69261	69300	CAAACCTGCGAATACCTTTTTACACTTTTAGAAGTCTGCT	JQAP01000012.1 Xylella fastidiosa strain ATCC 35879 contig12, whole genome shotgun sequence
40	77208	77247	CAAATTTTGTTTGAGCACCCTTGGCAGCATCTCGCATAAT	JQAP01000012.1 Xylella fastidiosa strain ATCC 35879 contig12, whole genome shotgun sequence
40	83983	84022	TTATCTGTGAAACATGCTGCCGATCCAATACGCGGCTTGC	JQAP01000012.1 Xylella fastidiosa strain ATCC 35879 contig12, whole genome shotgun sequence
40	85957	85996	CTCAATATAGTAACCATGCACACGGTTGTAACCGACTTTC	JQAP01000012.1 Xylella fastidiosa strain ATCC 35879 contig12, whole genome shotgun sequence
40	104010	104049	TTTACGGCATTGGAACCACGCGACCTGGCGCATAGTAACT	JQAP01000015.1 Xylella fastidiosa strain ATCC 35879 contig15, whole genome shotgun sequence
40	105568	105607	GCGAATGGATGATTCGCATATGGGGTGAGGAATGGGATGT	JQAP01000002.1 Xylella fastidiosa strain ATCC 35879 contig2, whole genome shotgun sequence
40	105984	106023	TGCGATGGTGGTGAGGAAGCGCCTTGAAGAGCATGGAACA	JQAP01000002.1 Xylella fastidiosa strain ATCC 35879 contig2, whole genome shotgun sequence
40	112139	112178	GTGGCCTTTAGTTCTTATCGAGGATGTCGCTTGATTCGTA	JQAP01000002.1 Xylella fastidiosa strain ATCC 35879 contig2, whole genome shotgun sequence
40	120422	120461	TCAATGCGAGTTGCTGGTAATTCCGGGGGACTTTCAGGCG	JQAP01000004.1 Xylella fastidiosa strain ATCC 35879 contig4, whole genome shotgun sequence
40	152533	152572	GGTGGTCGAGCGCGGTAGCGCCGCGTTAGCCAGTGGTGGT	JQAP01000001.1 Xylella fastidiosa strain ATCC 35879 contig1, whole genome shotgun sequence
40	155581	155620	GGCAGATGAAGAATCTGTGTCTCGCCATCTCTTAGAAACT	JQAP01000002.1 Xylella fastidiosa strain ATCC 35879 contig2, whole genome shotgun sequence
40	156989	157028	CATCTATTGGGTTTGTCTGTGAGCACAGTGCTTTGCAAGA	JQAP01000015.1 Xylella fastidiosa strain ATCC 35879 contig15, whole genome shotgun sequence
40	161897	161936	GCTTTGCGATCCATTAATGCGTCCGAGATAAGATCCCGGA	JQAP01000015.1 Xylella fastidiosa strain ATCC 35879 contig15, whole genome shotgun sequence
40	161972	162011	CGTCCATTGATTGAATGGCGTTGGTCGATAACTGTGTTTG	JQAP01000004.1 Xylella fastidiosa strain ATCC 35879 contig4, whole genome shotgun sequence
40	168771	168810	ACTTGGACTGACCGTGGCCGGTGTAGATCTCATCCGTTCA	JQAP01000015.1 Xylella fastidiosa strain ATCC 35879 contig15, whole genome shotgun sequence
40	172639	172678	CCGTGCTGATGTGCGTGGTGAGGATGGTGTTCATTTTGAG	JQAP01000004.1 Xylella fastidiosa strain ATCC 35879 contig4, whole genome shotgun sequence
40	182851	182890	TGATCCAACAGAGTATCTTGGGGGCCGCCAAACTCCAGTT	JQAP01000001.1 Xylella fastidiosa strain ATCC 35879 contig1, whole genome shotgun sequence
40	185111	185150	CCGGTAGGGCAGTGCGATTTGACGGAAGCCAACCCAGCCG	JQAP01000001.1 Xylella fastidiosa strain ATCC 35879 contig1, whole genome shotgun sequence
40	195950	195989	AGATTAAATCGGCCTGCGTCAGTGGACTCATGTCTGCTTT	JQAP01000001.1 Xylella fastidiosa strain ATCC 35879 contig1, whole genome shotgun sequence
40	199805	199844	AATGTGCTGGAGTCTATTTTTGGTGCTTGGAGTAGAAACG	JQAP01000001.1 Xylella fastidiosa strain ATCC 35879 contig1, whole genome shotgun sequence
40	205293	205332	GCAGAAGTTGGAGATCTTGGAAGCGTATACGATTACTGCT	JQAP01000004.1 Xylella fastidiosa strain ATCC 35879 contig4, whole genome shotgun sequence
40	206261	206300	GGGGTGTTTCACGCAGGAAGCATGGTCAAAGCAGAGACCA	JQAP01000015.1 Xylella fastidiosa strain ATCC 35879 contig15, whole genome shotgun sequence
40	221860	221899	AAAGCACCGATTTAACCAAGGTCTATTCATCCTAGATGGT	JQAP01000015.1 Xylella fastidiosa strain ATCC 35879 contig15, whole genome shotgun sequence
40	240272	240311	GTAACGCGTGCGGTGTTGCTGCGTTTGCGTGGTTGAGTGT	JQAP01000001.1 Xylella fastidiosa strain ATCC 35879 contig1, whole genome shotgun sequence
40	244817	244856	GGCAATCAGTGCGCGTTTCCCTTTTGTGATGCGCTTTTTT	JQAP01000004.1 Xylella fastidiosa strain ATCC 35879 contig4, whole genome shotgun sequence
40	247823	247862	GTTTTCGTTCCACTGAGCGTCAACCCCCTAACAGCGCGGA	JQAP01000014.1 Xylella fastidiosa strain ATCC 35879 contig14, whole genome shotgun sequence
40	250222	250261	ACGCCTACGCCCAAGCCTGGGCGAATCCAGCCAAATCGTT	JQAP01000015.1 Xylella fastidiosa strain ATCC 35879 contig15, whole genome shotgun sequence
40	262929	262968	CCATCATCGATGGGATCCCAAAAACCAACGTCCTGAATTG	JQAP01000004.1 Xylella fastidiosa strain ATCC 35879 contig4, whole genome shotgun sequence
40	267868	267907	TGCCGAATATGGAATGCTCCCACGTTCCACCCATACGCGT	JQAP01000004.1 Xylella fastidiosa strain ATCC 35879 contig4, whole genome shotgun sequence
40	276049	276088	AACGAGTAAATACCTTTTGTTATATAAAATCGTGACATAT	JQAP01000004.1 Xylella fastidiosa strain ATCC 35879 contig4, whole genome shotgun sequence
40	281519	281558	AACATCACTGGTACGCAACCCAGCGTCGTTCAACGCAATG	JQAP01000014.1 Xylella fastidiosa strain ATCC 35879 contig14, whole genome shotgun sequence
40	284352	284391	CATTACGCCTGGACCCATAGTGGAACTCAATGACACTTTT	JQAP01000015.1 Xylella fastidiosa strain ATCC 35879 contig15, whole genome shotgun sequence
40	322029	322068	TGGATTCCAGAAGGCAACGATGTTATCGAAGGTTTCATCG	JQAP01000015.1 Xylella fastidiosa strain ATCC 35879 contig15, whole genome shotgun sequence
40	322687	322726	GCAGCAAAATCTCGATCAATATCCTTACGAGTATTCAATC	JQAP01000015.1 Xylella fastidiosa strain ATCC 35879 contig15, whole genome shotgun sequence
40	323400	323439	CAATTGTCAGGGAAACTCTTCGGAAGCACTACAATGAAAT	JQAP01000015.1 Xylella fastidiosa strain ATCC 35879 contig15, whole genome shotgun sequence
40	327466	327505	CACGCCACAGTAATGAATATCAATTTGCACATCATGCGCA	JQAP01000014.1 Xylella fastidiosa strain ATCC 35879 contig14, whole genome shotgun sequence
40	335958	335997	AATCATGACACCTTCGGATATGCCCAACCCATGAAGGGCG	JQAP01000015.1 Xylella fastidiosa strain ATCC 35879 contig15, whole genome shotgun sequence
40	351492	351531	TGCGGTGGGGGAGGGGATCGCTGAATCGTTCATGGTGTTG	JQAP01000004.1 Xylella fastidiosa strain ATCC 35879 contig4, whole genome shotgun sequence
40	364464	364503	GATCTGAGATTTGGGCATTTTCTAACGATGGAAAAGTTGC	JQAP01000004.1 Xylella fastidiosa strain ATCC 35879 contig4, whole genome shotgun sequence
40	371760	371799	TGCGTCGAGCAGTTGTGCTGCAGAGATTAAGCCCTTGCGT	JQAP01000004.1 Xylella fastidiosa strain ATCC 35879 contig4, whole genome shotgun sequence
40	398138	398177	GAGTGGTTGGTCTATTTCTATCTGATAATTAAGCTATCGC	JQAP01000004.1 Xylella fastidiosa strain ATCC 35879 contig4, whole genome shotgun sequence
40	464442	464481	TGAGCATGAACAACTATCCGCAGAAATGCGAAAAACGACG	JQAP01000014.1 Xylella fastidiosa strain ATCC 35879 contig14, whole genome shotgun sequence
40	474107	474146	TACTCAGCTTGTCATTATTCCAGCTATCAAACCTTCTAAA	JQAP01000004.1 Xylella fastidiosa strain ATCC 35879 contig4, whole genome shotgun sequence
40	483965	484004	ACAGTCGATCCGGCGTGACGGGGAGTTGTTACTTGAGGCG	JQAP01000004.1 Xylella fastidiosa strain ATCC 35879 contig4, whole genome shotgun sequence
40	722170	722209	ACTCCAACGCTGCGCACGTGCGTCCTCGTGAACCGACAAG	JQAP01000014.1 Xylella fastidiosa strain ATCC 35879 contig14, whole genome shotgun sequence
40	747027	747066	TGAACGGTCAACGATAACTGCCAGAGCAATCACAAAGAAC	JQAP01000014.1 Xylella fastidiosa strain ATCC 35879 contig14, whole genome shotgun sequence
40	761613	761652	AGTCAAGCGCGGCACCGTGCGCGGACACGGCGCCAACCAA	JQAP01000014.1 Xylella fastidiosa strain ATCC 35879 contig14, whole genome shotgun sequence
39	1180	1218	GCCCGCGTCGCCGGTGAACAGCGCCGAGCCGTTATGCAC	JQAP01000016.1 Xylella fastidiosa strain ATCC 35879 contig16, whole genome shotgun sequence
39	3579	3617	GTGTTGGCACGGCCAATTGTGTTGTGTAAAGCGTTTCAT	JQAP01000002.1 Xylella fastidiosa strain ATCC 35879 contig2, whole genome shotgun sequence
39	17857	17895	CAGTCCGCTGAGAATGATCGTGATCCTAGCGTCCTCCTC	JQAP01000001.1 Xylella fastidiosa strain ATCC 35879 contig1, whole genome shotgun sequence
39	18479	18517	GCCAACAACCTCGTTTTATCGCGAGCACTAAAACCATAT	JQAP01000014.1 Xylella fastidiosa strain ATCC 35879 contig14, whole genome shotgun sequence
39	18509	18547	TTGATCCATACTTAATCCTATGGCCTAGGAGATTGCAGC	JQAP01000001.1 Xylella fastidiosa strain ATCC 35879 contig1, whole genome shotgun sequence
39	31161	31199	TGAAGGCCACATCATGATAGATCGTCTCAGCAGAGCAAC	JQAP01000014.1 Xylella fastidiosa strain ATCC 35879 contig14, whole genome shotgun sequence
39	34657	34695	TCATCATCGGCAATCAATATACGCAGCAAACTGAAAACC	JQAP01000014.1 Xylella fastidiosa strain ATCC 35879 contig14, whole genome shotgun sequence
39	47811	47849	ATGGAGCGCTATGCACCTCACTACAAGGATCTGGCCTCT	JQAP01000002.1 Xylella fastidiosa strain ATCC 35879 contig2, whole genome shotgun sequence
39	48368	48406	CACATCGCGCACATAACTCAAACCATGATGAACGGCATC	JQAP01000014.1 Xylella fastidiosa strain ATCC 35879 contig14, whole genome shotgun sequence
39	54497	54535	CCCCAAGGTCAGCGTGTTGCCGAAACTGCGCAAGGCAAC	JQAP01000012.1 Xylella fastidiosa strain ATCC 35879 contig12, whole genome shotgun sequence
39	64337	64375	TTAATTGTGAGTCTTTTTGAAGTGGAACTGCGCCAGCAT	JQAP01000016.1 Xylella fastidiosa strain ATCC 35879 contig16, whole genome shotgun sequence
39	69158	69196	TTACCAGTGTCAGTGCGGCCAATCCGTCCTTACTGGTTA	JQAP01000004.1 Xylella fastidiosa strain ATCC 35879 contig4, whole genome shotgun sequence
39	70147	70185	AGGTTCACTTTCTAAGTAATTCAGCGCTCTAAAACAATG	JQAP01000012.1 Xylella fastidiosa strain ATCC 35879 contig12, whole genome shotgun sequence
39	70950	70988	CATTGGGCACTGAACGGAGAAATGAAGCTTGGCAAGCAA	JQAP01000012.1 Xylella fastidiosa strain ATCC 35879 contig12, whole genome shotgun sequence
39	72302	72340	CAACAACTTCTGTTCCAGAAAGTCTCTCACAAACAAAAA	JQAP01000001.1 Xylella fastidiosa strain ATCC 35879 contig1, whole genome shotgun sequence
39	85565	85603	CGCTCAGGGTGAAGATAGAGGTCATTCGGCTCGAATCGC	JQAP01000012.1 Xylella fastidiosa strain ATCC 35879 contig12, whole genome shotgun sequence
39	88831	88869	TGGACGCCTCTCAGTGGCATTACACAGCAAAACAGCGTT	JQAP01000012.1 Xylella fastidiosa strain ATCC 35879 contig12, whole genome shotgun sequence
39	90308	90346	CTGTGGAATGCCGGTGGTGGTGCCAGTGGTGGTTCCGGC	JQAP01000015.1 Xylella fastidiosa strain ATCC 35879 contig15, whole genome shotgun sequence
39	90592	90630	TCCTTTCCATCAGAAATAATTTCACCTCCCTAATAACAC	JQAP01000012.1 Xylella fastidiosa strain ATCC 35879 contig12, whole genome shotgun sequence
39	91423	91461	CCAGAAAAATCATTGATATCGGCCAGAAATATTTCAGCT	JQAP01000012.1 Xylella fastidiosa strain ATCC 35879 contig12, whole genome shotgun sequence
39	95801	95839	CCAGCAGGCGGCGGTAAAGCCGGCCAGATCCCCGATGAC	JQAP01000004.1 Xylella fastidiosa strain ATCC 35879 contig4, whole genome shotgun sequence
39	105388	105426	GTAAGCCACTTTGATAACCATACAAGCATTAATCAGCTT	JQAP01000015.1 Xylella fastidiosa strain ATCC 35879 contig15, whole genome shotgun sequence
39	111087	111125	TATTGCTTCCCAGAGGGCCCTACACGGACCTGCTGAGAC	JQAP01000014.1 Xylella fastidiosa strain ATCC 35879 contig14, whole genome shotgun sequence
39	112146	112184	TCCAGGCGCACGATTCTGCTCGTGCACAATCAGAGGCAG	JQAP01000015.1 Xylella fastidiosa strain ATCC 35879 contig15, whole genome shotgun sequence
39	119016	119054	TTCTGATGCGTCGGTGCATCTTGATTGGCCTTCCGGGTT	JQAP01000002.1 Xylella fastidiosa strain ATCC 35879 contig2, whole genome shotgun sequence
39	119548	119586	GAGGATATTCTACGTTCAGGGAAGGTAGACGGTGTGACC	JQAP01000004.1 Xylella fastidiosa strain ATCC 35879 contig4, whole genome shotgun sequence
39	121806	121844	GACAAAAAACGAAACACACACCTTTATTAACTTATTTTT	JQAP01000014.1 Xylella fastidiosa strain ATCC 35879 contig14, whole genome shotgun sequence
39	147391	147429	CAAGAACCCATTGGTACGCGTGTCTTTGGGCCGGTAACT	JQAP01000002.1 Xylella fastidiosa strain ATCC 35879 contig2, whole genome shotgun sequence
39	153822	153860	GACGCCAATCCCGCATAATGGTTGTCGTCCTCCAAAAAA	JQAP01000002.1 Xylella fastidiosa strain ATCC 35879 contig2, whole genome shotgun sequence
39	162758	162796	TGGTGAAGCTGCCAGACATGGGTATGGTACTTGGCGACA	JQAP01000002.1 Xylella fastidiosa strain ATCC 35879 contig2, whole genome shotgun sequence
39	166463	166501	GGAACCCTTGAGGAAAGGCAGGAATGTAAGCAGCAAAGT	JQAP01000015.1 Xylella fastidiosa strain ATCC 35879 contig15, whole genome shotgun sequence
39	171381	171419	TGGTGAGGACGTGGAGAATATTATTCAGAAGTTGTTACA	JQAP01000002.1 Xylella fastidiosa strain ATCC 35879 contig2, whole genome shotgun sequence
39	173785	173823	TAATCTGACAACTGCACCTTATCCTGGGTTTCCCACTGA	JQAP01000004.1 Xylella fastidiosa strain ATCC 35879 contig4, whole genome shotgun sequence
39	174502	174540	GTACCCTCACCAACGACTGCAGCCAACTGTGCGATGACG	JQAP01000014.1 Xylella fastidiosa strain ATCC 35879 contig14, whole genome shotgun sequence
39	174534	174572	TTTGGTTGATGAGGTGCATACTGAAGATGGTTTTGGGGG	JQAP01000004.1 Xylella fastidiosa strain ATCC 35879 contig4, whole genome shotgun sequence
39	175235	175273	TGAACCTATCATGATCGCTGCATCAAATAACCCTTCATT	JQAP01000002.1 Xylella fastidiosa strain ATCC 35879 contig2, whole genome shotgun sequence
39	177487	177525	CAACAACTTCTGTTCCAGAAAGTCTCTCACAAACAAAAA	JQAP01000001.1 Xylella fastidiosa strain ATCC 35879 contig1, whole genome shotgun sequence
39	184348	184386	TGAGATCGCTCGGACCCATCCCACCATTCTCAAGCGCAA	JQAP01000002.1 Xylella fastidiosa strain ATCC 35879 contig2, whole genome shotgun sequence
39	184976	185014	CGTCATTACACCAGGAGAGTGCAAGATAGGCATTATGCC	JQAP01000015.1 Xylella fastidiosa strain ATCC 35879 contig15, whole genome shotgun sequence
39	189119	189157	GCCTTTTCGGCCTTTTTCGTGGTGGTTTTCTTAGCAGCA	JQAP01000001.1 Xylella fastidiosa strain ATCC 35879 contig1, whole genome shotgun sequence
39	195407	195445	TCAAGTAATTTCAGGAAATGGCCGGTCCAAAGGATGGGA	JQAP01000015.1 Xylella fastidiosa strain ATCC 35879 contig15, whole genome shotgun sequence
39	198185	198223	GTTGCTCAACGGTGGTCGGGTAGGCATTGATGTGCGTGA	JQAP01000004.1 Xylella fastidiosa strain ATCC 35879 contig4, whole genome shotgun sequence
39	199846	199884	GATGCTTATATCATTCTGATTATTTTATGATGGGTTTGT	JQAP01000001.1 Xylella fastidiosa strain ATCC 35879 contig1, whole genome shotgun sequence
39	210460	210498	ACTTTCATTGTGCGATGGGGTCAGAAAGGGCAACGTTTG	JQAP01000004.1 Xylella fastidiosa strain ATCC 35879 contig4, whole genome shotgun sequence
39	223642	223680	CCTCTCTTCTTTTGAAGGTTATAGGACGATTTTTATTGA	JQAP01000001.1 Xylella fastidiosa strain ATCC 35879 contig1, whole genome shotgun sequence
39	224640	224678	GCATGAACAATGCACCCAGATGATTCACCTGCGCACTGC	JQAP01000015.1 Xylella fastidiosa strain ATCC 35879 contig15, whole genome shotgun sequence
39	243585	243623	GCAGCATCGTGAGCATCCTTGGATGAGGTGAGCAGGGTA	JQAP01000004.1 Xylella fastidiosa strain ATCC 35879 contig4, whole genome shotgun sequence
39	260443	260481	GTGTCGGCGTTATTAGCTGCGTTATTCGGTTCGCTCAAC	JQAP01000001.1 Xylella fastidiosa strain ATCC 35879 contig1, whole genome shotgun sequence
39	271050	271088	AGTAACACAGGATTAGCTTTAGCGAAACCCTGTTTGAAC	JQAP01000015.1 Xylella fastidiosa strain ATCC 35879 contig15, whole genome shotgun sequence
39	275273	275311	TTGTTGGCAGTTAGTTTTACCGTTTCGCTATTTCTTTTT	JQAP01000001.1 Xylella fastidiosa strain ATCC 35879 contig1, whole genome shotgun sequence
39	278853	278891	AGAGTTGGGTCTGACCGCCGGCCGGCAATTCCGCGAGAT	JQAP01000015.1 Xylella fastidiosa strain ATCC 35879 contig15, whole genome shotgun sequence
39	283405	283443	CATAGCCAGAGCCTGCAATCGCGTTGGCAATGATGCAAG	JQAP01000015.1 Xylella fastidiosa strain ATCC 35879 contig15, whole genome shotgun sequence
39	283999	284037	CCGATGCACTGCCCAACAGCGTCTGCGTGCCCCCACCAG	JQAP01000014.1 Xylella fastidiosa strain ATCC 35879 contig14, whole genome shotgun sequence
39	290036	290074	TTCCAAAAATTCAAACCGGCACAAATCGACTTGCCGCTC	JQAP01000015.1 Xylella fastidiosa strain ATCC 35879 contig15, whole genome shotgun sequence
39	301360	301398	ATTTAATTTATTCCATTGATTTGATAAATTAATAAGGGG	JQAP01000004.1 Xylella fastidiosa strain ATCC 35879 contig4, whole genome shotgun sequence
39	305832	305870	TGGTTGTACAAAACTCTGGGAATTGATGGCTTTGGTTTA	JQAP01000004.1 Xylella fastidiosa strain ATCC 35879 contig4, whole genome shotgun sequence
39	329824	329862	TCCATAGTGACCTGCTTGGCGACGCAGAACGTGTCTCCT	JQAP01000004.1 Xylella fastidiosa strain ATCC 35879 contig4, whole genome shotgun sequence
39	330018	330056	CACTTAACACTCGGATGAATCGCTGGCGCGCAGTTGCAC	JQAP01000015.1 Xylella fastidiosa strain ATCC 35879 contig15, whole genome shotgun sequence
39	333237	333275	CACTGCCTCCCAACAGCGCGGAAACTCAACACTCACCGC	JQAP01000014.1 Xylella fastidiosa strain ATCC 35879 contig14, whole genome shotgun sequence
39	342035	342073	AGCATTACTCACAATCATAAAATCCAGGCCGCCTTATCA	JQAP01000015.1 Xylella fastidiosa strain ATCC 35879 contig15, whole genome shotgun sequence
39	394362	394400	GACGTCAGACCAACGTAACAAGCGGTTACCGTCCATCAC	JQAP01000014.1 Xylella fastidiosa strain ATCC 35879 contig14, whole genome shotgun sequence
39	397357	397395	CCACGCACCACCTGCTCAGTGATCAACCGCATCTCCTGC	JQAP01000014.1 Xylella fastidiosa strain ATCC 35879 contig14, whole genome shotgun sequence
39	401939	401977	GGTTCAGGGGCGGCGGCTAGTGGGAAAGGCTCCACGGCG	JQAP01000004.1 Xylella fastidiosa strain ATCC 35879 contig4, whole genome shotgun sequence
39	422318	422356	CCTGTCTGTAAAGCAAAGGCCAGCCAGTGTGGTTGCTAT	JQAP01000014.1 Xylella fastidiosa strain ATCC 35879 contig14, whole genome shotgun sequence
39	424710	424748	TGCGTTTGATACCGAAGGTAAGCCCACGAAGGCGTTGGA	JQAP01000004.1 Xylella fastidiosa strain ATCC 35879 contig4, whole genome shotgun sequence
39	431929	431967	CTATTTGCTGCGCAATCTTCTGTCGATGCATTGGTGAAT	JQAP01000004.1 Xylella fastidiosa strain ATCC 35879 contig4, whole genome shotgun sequence
39	440396	440434	CGATGAGACCACGTATAATCATTAGGGTAAGTATATATA	JQAP01000004.1 Xylella fastidiosa strain ATCC 35879 contig4, whole genome shotgun sequence
39	447749	447787	TTTTTGTGCACGTAACTGAGTTAGGCGCTGCACGATTTG	JQAP01000004.1 Xylella fastidiosa strain ATCC 35879 contig4, whole genome shotgun sequence
39	469956	469994	AAACTTGCTCGCACTGTACGAGGGATGATTCTCCAAAGC	JQAP01000014.1 Xylella fastidiosa strain ATCC 35879 contig14, whole genome shotgun sequence
39	472822	472860	ATTGCCCAAGTCGCAACCATCTCTGCTAACTCAGACGAG	JQAP01000014.1 Xylella fastidiosa strain ATCC 35879 contig14, whole genome shotgun sequence
39	474233	474271	ATACAGATACAGATCAACATCCACTGCATTTACACGAAA	JQAP01000014.1 Xylella fastidiosa strain ATCC 35879 contig14, whole genome shotgun sequence
39	488372	488410	AAAAAAGAATTTCAGACGGTTCTTAGTTGCCATGCAAAA	JQAP01000004.1 Xylella fastidiosa strain ATCC 35879 contig4, whole genome shotgun sequence
39	578040	578078	TCCCGCATTGCCGCCATGATGAATGAATCCGAGAATTGT	JQAP01000014.1 Xylella fastidiosa strain ATCC 35879 contig14, whole genome shotgun sequence
39	685786	685824	CCTAGACAACTGAAGCAGTCGGGAAAACTCTGTGATATT	JQAP01000014.1 Xylella fastidiosa strain ATCC 35879 contig14, whole genome shotgun sequence
39	686826	686864	TGATAACACCCCAAACGTAAACTCCCCTGGCGAACGTAA	JQAP01000014.1 Xylella fastidiosa strain ATCC 35879 contig14, whole genome shotgun sequence
39	734976	735014	TATATGTACTACCTGCGTGGCCTGAGCAACAGCAACCGC	JQAP01000014.1 Xylella fastidiosa strain ATCC 35879 contig14, whole genome shotgun sequence
38	1932	1969	CAAGCTGGTCGAAGCAGGTTTACCTTAGCTACATTACC	JQAP01000001.1 Xylella fastidiosa strain ATCC 35879 contig1, whole genome shotgun sequence
38	4062	4099	CCCAAGGACTCAAGCCTTTTTTCTCAGTGGGTGCTATG	JQAP01000001.1 Xylella fastidiosa strain ATCC 35879 contig1, whole genome shotgun sequence
38	12875	12912	AACCAACCAACCGCAATTGCAGATTGATGCTAATCCAG	JQAP01000001.1 Xylella fastidiosa strain ATCC 35879 contig1, whole genome shotgun sequence
38	18839	18876	GGCTGCTTTAGTAGGTGAGTTCTCATTGTGTTGATGTG	JQAP01000002.1 Xylella fastidiosa strain ATCC 35879 contig2, whole genome shotgun sequence
38	42349	42386	CATCCCCAACGACAACCAGCACCGCTCCAGCAAATAGC	JQAP01000015.1 Xylella fastidiosa strain ATCC 35879 contig15, whole genome shotgun sequence
38	63060	63097	TCCGTTCATACTTCTTCTTGTTGAGAAGAATGCATTGC	JQAP01000001.1 Xylella fastidiosa strain ATCC 35879 contig1, whole genome shotgun sequence
38	69196	69233	TGTTATAACGTTCGCGAACACGGTTGAAGTTGAAATAG	JQAP01000012.1 Xylella fastidiosa strain ATCC 35879 contig12, whole genome shotgun sequence
38	70510	70547	CTTTGGCTTTGTGACGATTGGTAGAACCTTTGACTTTA	JQAP01000014.1 Xylella fastidiosa strain ATCC 35879 contig14, whole genome shotgun sequence
38	78178	78215	GCGTGTTGCGTCCTTTTCATACTGGCCAAGTTTCGGTC	JQAP01000012.1 Xylella fastidiosa strain ATCC 35879 contig12, whole genome shotgun sequence
38	79961	79998	CTTCAGTGCGGTGTCCGCCGGAGCGCTTATCTTCACTA	JQAP01000012.1 Xylella fastidiosa strain ATCC 35879 contig12, whole genome shotgun sequence
38	92778	92815	TACTCATCTAGTCCATCGCTGTAGGCAAAAAACCGCGA	JQAP01000004.1 Xylella fastidiosa strain ATCC 35879 contig4, whole genome shotgun sequence
38	105137	105174	CCAAAGGAAACGACCTTATTGACTCCGAATATCAAACA	JQAP01000014.1 Xylella fastidiosa strain ATCC 35879 contig14, whole genome shotgun sequence
38	106651	106688	TTTCCATGTCCTCAATTGTAAGTTGCCGTACCGACGAG	JQAP01000015.1 Xylella fastidiosa strain ATCC 35879 contig15, whole genome shotgun sequence
38	111085	111122	CAACGGGCCACATATCCAGGCACTGCTGGCGCCATTGG	JQAP01000002.1 Xylella fastidiosa strain ATCC 35879 contig2, whole genome shotgun sequence
38	118831	118868	ACGCCTAGAAGGCAACCTACTGGCCGCCGCCCAAGAAA	JQAP01000014.1 Xylella fastidiosa strain ATCC 35879 contig14, whole genome shotgun sequence
38	141862	141899	TATGTTGTTTATGTATCGGGTCTTTATTTGAATGTGCA	JQAP01000001.1 Xylella fastidiosa strain ATCC 35879 contig1, whole genome shotgun sequence
38	145104	145141	GTGGTGATAAAAAATCAGGTAAATAAGGCAATATGAAT	JQAP01000002.1 Xylella fastidiosa strain ATCC 35879 contig2, whole genome shotgun sequence
38	156175	156212	TAAAAATCATCATGTTGTTTTGGTGCCTCTATGGTGGC	JQAP01000004.1 Xylella fastidiosa strain ATCC 35879 contig4, whole genome shotgun sequence
38	158215	158252	GAGGATTTACCGGCGGTCGCTATTGAATGTGCGCGTCT	JQAP01000004.1 Xylella fastidiosa strain ATCC 35879 contig4, whole genome shotgun sequence
38	171068	171105	CGTACCCCACTGGCTGTCATCAGGGGGGCAACCGAACT	JQAP01000015.1 Xylella fastidiosa strain ATCC 35879 contig15, whole genome shotgun sequence
38	180666	180703	AGGGTATTAGGTATTTCATGTGATGAACTAAAAATTGA	JQAP01000001.1 Xylella fastidiosa strain ATCC 35879 contig1, whole genome shotgun sequence
38	187867	187904	AACATTCAGTAACCTAGACTTTTGGTCGTCTTGAGTGT	JQAP01000001.1 Xylella fastidiosa strain ATCC 35879 contig1, whole genome shotgun sequence
38	188430	188467	GTAAGTGCCATATCAAAGTGGCACATATCCCTGGATAG	JQAP01000001.1 Xylella fastidiosa strain ATCC 35879 contig1, whole genome shotgun sequence
38	192655	192692	TTACCTGGCCGGATTCCTGGCCGTGGTGTGCTATTGGC	JQAP01000004.1 Xylella fastidiosa strain ATCC 35879 contig4, whole genome shotgun sequence
38	215848	215885	AGCTTCGCACCAACAAGACTGGATCCAGCAAACCCAGC	JQAP01000015.1 Xylella fastidiosa strain ATCC 35879 contig15, whole genome shotgun sequence
38	218272	218309	TGATTATGGGGATCGCTGGTGGCGCGATCATCCCGCAG	JQAP01000004.1 Xylella fastidiosa strain ATCC 35879 contig4, whole genome shotgun sequence
38	222167	222204	CTATTTTTCTAAGAAAAACGCGCCCGTAGCTCAGTTGG	JQAP01000015.1 Xylella fastidiosa strain ATCC 35879 contig15, whole genome shotgun sequence
38	253620	253657	ACATTGCGGTAAATACTCATATTAATGCATCGGAACGC	JQAP01000015.1 Xylella fastidiosa strain ATCC 35879 contig15, whole genome shotgun sequence
38	262350	262387	AATACGCCAGCAAACACGGCATGGGCACCGGGGTGGGT	JQAP01000015.1 Xylella fastidiosa strain ATCC 35879 contig15, whole genome shotgun sequence
38	266902	266939	TTCGCTGATGTGACTGCTGAGTCGATCCAACTCCTCAT	JQAP01000004.1 Xylella fastidiosa strain ATCC 35879 contig4, whole genome shotgun sequence
38	275534	275571	CCATGACAATTTATTGAGGCGAAAAATCTTTTATTGTG	JQAP01000001.1 Xylella fastidiosa strain ATCC 35879 contig1, whole genome shotgun sequence
38	288586	288623	GATGGTTAAATTTATTTTCCTCAACCCATCCACAAACC	JQAP01000014.1 Xylella fastidiosa strain ATCC 35879 contig14, whole genome shotgun sequence
38	297989	298026	GCCCCACCTCCTCCCCACCCCTTTGAGCAAACCAGCCA	JQAP01000015.1 Xylella fastidiosa strain ATCC 35879 contig15, whole genome shotgun sequence
38	311183	311220	GAAGACGATCATCGTGAGCTGGTTCTTGGCTATTTCGG	JQAP01000004.1 Xylella fastidiosa strain ATCC 35879 contig4, whole genome shotgun sequence
38	337347	337384	CCACCCACACCTTGCCACCCTTACATAACCAAAAAATA	JQAP01000014.1 Xylella fastidiosa strain ATCC 35879 contig14, whole genome shotgun sequence
38	337948	337985	ACGTCACGAGAATGTGGGGAAATATCTCCAACAGTATC	JQAP01000015.1 Xylella fastidiosa strain ATCC 35879 contig15, whole genome shotgun sequence
38	343190	343227	TGTGTGGTTCGATCCACAATGGCCCAAGGGAGATGATG	JQAP01000004.1 Xylella fastidiosa strain ATCC 35879 contig4, whole genome shotgun sequence
38	359065	359102	GAACTTAAAGCCGTTGAATGCAAGAAAATGTTCCAGGA	JQAP01000004.1 Xylella fastidiosa strain ATCC 35879 contig4, whole genome shotgun sequence
38	400328	400365	TCAATTTACATGGAAAAATCACATATAAACAAAGACTA	JQAP01000014.1 Xylella fastidiosa strain ATCC 35879 contig14, whole genome shotgun sequence
38	404011	404048	ACACGACTGGTTTCGTGTCGTCGTCAAAGAAGGCCGCA	JQAP01000014.1 Xylella fastidiosa strain ATCC 35879 contig14, whole genome shotgun sequence
38	437295	437332	AAAGCTGATGAGGGTAAGATCACGATTCAGCTGCAACG	JQAP01000004.1 Xylella fastidiosa strain ATCC 35879 contig4, whole genome shotgun sequence
38	468570	468607	ACTCAACCACATACCACCAAAGCATACGGAATAAACAC	JQAP01000014.1 Xylella fastidiosa strain ATCC 35879 contig14, whole genome shotgun sequence
38	474139	474176	CTTTAGCTTCTAAGAACGTTGGTTATCCAATTCCTGCA	JQAP01000014.1 Xylella fastidiosa strain ATCC 35879 contig14, whole genome shotgun sequence
38	478104	478141	GTCAGGTTCAATTATCTAGGTTTCTCGGTGTCCGCAGA	JQAP01000004.1 Xylella fastidiosa strain ATCC 35879 contig4, whole genome shotgun sequence
38	496406	496443	AACATGACAGTAACGAAAAGTCCCAACATGATTAGCAT	JQAP01000014.1 Xylella fastidiosa strain ATCC 35879 contig14, whole genome shotgun sequence
38	536320	536357	CCCCTTAGCATCCGGCACCCTTTGTTTTGATTGGAATC	JQAP01000014.1 Xylella fastidiosa strain ATCC 35879 contig14, whole genome shotgun sequence
38	546444	546481	TAGTGAAGATAAGCGCTCCGGCGGACACCGCACTGAAG	JQAP01000014.1 Xylella fastidiosa strain ATCC 35879 contig14, whole genome shotgun sequence
38	611493	611530	ACGCAGTTGGCCTACGAGCCGCCGCCGAAGCGATGCCA	JQAP01000014.1 Xylella fastidiosa strain ATCC 35879 contig14, whole genome shotgun sequence
38	687660	687697	GTAACGCATCTTCTATACGGGAATCTTTCCCCATAAGT	JQAP01000014.1 Xylella fastidiosa strain ATCC 35879 contig14, whole genome shotgun sequence
38	761157	761194	CCCATACATCATGAAGAGAACACCCTCAACGACACATC	JQAP01000014.1 Xylella fastidiosa strain ATCC 35879 contig14, whole genome shotgun sequence
37	8945	8981	CTTGAACTACAAAAAGGACCTGCTGTCTTTACTCATC	JQAP01000001.1 Xylella fastidiosa strain ATCC 35879 contig1, whole genome shotgun sequence
37	9203	9239	CTACCAACGGGAACAGCACCAGATAGCAAATGACCGG	JQAP01000008.1 Xylella fastidiosa strain ATCC 35879 contig8, whole genome shotgun sequence
37	19562	19598	GCGTATTCCCGTTGATCGGCATCGTTACCGCTCTGCT	JQAP01000001.1 Xylella fastidiosa strain ATCC 35879 contig1, whole genome shotgun sequence
37	31873	31909	GCACTTTCACGGCAGATTTGGTGGCTGACAACCACAG	JQAP01000014.1 Xylella fastidiosa strain ATCC 35879 contig14, whole genome shotgun sequence
37	35595	35631	AACGCTTATCCTCACTATAGGAACCCCCTCAGTGCTT	JQAP01000016.1 Xylella fastidiosa strain ATCC 35879 contig16, whole genome shotgun sequence
37	39848	39884	CATCAATCCCGGCGAGGTAGTCGGTGCGCGTGGTGGC	JQAP01000002.1 Xylella fastidiosa strain ATCC 35879 contig2, whole genome shotgun sequence
37	48025	48061	CGAGCACTAGCGCACGCTCCAAATAACGCTGCTCACC	JQAP01000014.1 Xylella fastidiosa strain ATCC 35879 contig14, whole genome shotgun sequence
37	64812	64848	ATTCTTTGGTTTCTATATTTTATGTTAAGAGTATTTT	JQAP01000001.1 Xylella fastidiosa strain ATCC 35879 contig1, whole genome shotgun sequence
37	68457	68493	TAGTTGCGCCAGCACCGCTTCAGCAGTAAGCAATAAA	JQAP01000012.1 Xylella fastidiosa strain ATCC 35879 contig12, whole genome shotgun sequence
37	90230	90266	CCGTTGACAAATGCCACTCCCGATCTTGCTGGGCAGT	JQAP01000012.1 Xylella fastidiosa strain ATCC 35879 contig12, whole genome shotgun sequence
37	91465	91501	TTGCGACATCGCATTCAAGAAACAAGGCAGCATTGTT	JQAP01000004.1 Xylella fastidiosa strain ATCC 35879 contig4, whole genome shotgun sequence
37	93427	93463	ACCGCTGCAGTAAGGGAAGATGTCAAATCGTGTTGCC	JQAP01000001.1 Xylella fastidiosa strain ATCC 35879 contig1, whole genome shotgun sequence
37	94909	94945	ATGGGATCGTTTGAAAGGGGGCAAGGGTGTACGCATG	JQAP01000004.1 Xylella fastidiosa strain ATCC 35879 contig4, whole genome shotgun sequence
37	106719	106755	CGGAACCCCGACGGCATTTTTGGTTTGATGTTATTGC	JQAP01000015.1 Xylella fastidiosa strain ATCC 35879 contig15, whole genome shotgun sequence
37	107463	107499	TGCGCGGCAATTGAATGCAGTAGCTGCCGTGGATCAG	JQAP01000002.1 Xylella fastidiosa strain ATCC 35879 contig2, whole genome shotgun sequence
37	110384	110420	ACTGCTGATATGGGGGCCTCCAGGCAGCCACGTCGAA	JQAP01000014.1 Xylella fastidiosa strain ATCC 35879 contig14, whole genome shotgun sequence
37	120553	120589	CACACCAACGATACAACACCGTTCGATCACCTACCCT	JQAP01000014.1 Xylella fastidiosa strain ATCC 35879 contig14, whole genome shotgun sequence
37	122103	122139	CGAAAAAACCCTAGCACAAGCTCAATTTAAAGACGCA	JQAP01000014.1 Xylella fastidiosa strain ATCC 35879 contig14, whole genome shotgun sequence
37	145252	145288	ATTTTCGAGTAAGAAGGCCGCCTGCTTGATTAAGAAG	JQAP01000002.1 Xylella fastidiosa strain ATCC 35879 contig2, whole genome shotgun sequence
37	150648	150684	GCTCGTAAAAGGATGTCTAATGTGAGTTTAAATAACG	JQAP01000002.1 Xylella fastidiosa strain ATCC 35879 contig2, whole genome shotgun sequence
37	162502	162538	GATGCCTTGGCTACTAAAAATCTGCAGCATCAACGCA	JQAP01000014.1 Xylella fastidiosa strain ATCC 35879 contig14, whole genome shotgun sequence
37	165067	165103	TGCTTATGATGCAATTGTGCTCGCGGTGGCGCATGCC	JQAP01000002.1 Xylella fastidiosa strain ATCC 35879 contig2, whole genome shotgun sequence
37	167322	167358	GGATGCTGTGTTCTGTCCTTGACTTAGTTCCAACAAT	JQAP01000001.1 Xylella fastidiosa strain ATCC 35879 contig1, whole genome shotgun sequence
37	170076	170112	TGTTCTACCCAATAACAAAGTTAGTTCCTTGTGTACC	JQAP01000002.1 Xylella fastidiosa strain ATCC 35879 contig2, whole genome shotgun sequence
37	170249	170285	TTTATTAAAGGAACGTCTCATCTTTCTGGTTGGCCCT	JQAP01000002.1 Xylella fastidiosa strain ATCC 35879 contig2, whole genome shotgun sequence
37	197711	197747	GGAGAAAGCGCATATGGATGTCTTCAATATTCTCCTA	JQAP01000004.1 Xylella fastidiosa strain ATCC 35879 contig4, whole genome shotgun sequence
37	198430	198466	AAGGATTTTTACTTTTAATCCAGTGAATCTGCTGCCT	JQAP01000004.1 Xylella fastidiosa strain ATCC 35879 contig4, whole genome shotgun sequence
37	200645	200681	TGGAGTTTGGATACGCGACAAACGTGGATAACAAGTG	JQAP01000014.1 Xylella fastidiosa strain ATCC 35879 contig14, whole genome shotgun sequence
37	205429	205465	TCCGCCATACATAACAGCAAGTTACGCATGACCTTTA	JQAP01000001.1 Xylella fastidiosa strain ATCC 35879 contig1, whole genome shotgun sequence
37	209891	209927	ATTGGTAGCTGCTTGTTACAGCGCTTTGGTGCTGGAT	JQAP01000004.1 Xylella fastidiosa strain ATCC 35879 contig4, whole genome shotgun sequence
37	212840	212876	GAGTAGGTTGCCGAGGGTATGCGCTTCTATCGCATCC	JQAP01000002.1 Xylella fastidiosa strain ATCC 35879 contig2, whole genome shotgun sequence
37	217135	217171	AAAATCACCGATCAAGGGGACTTCAATGCCCATCATT	JQAP01000015.1 Xylella fastidiosa strain ATCC 35879 contig15, whole genome shotgun sequence
37	222029	222065	TTCATTTATTAATAGATTTTTCCTATTATTCATAATA	JQAP01000001.1 Xylella fastidiosa strain ATCC 35879 contig1, whole genome shotgun sequence
37	223206	223242	ACTATGGTGATTGAGTGAAACAAGAGTTCCTGTCGAG	JQAP01000001.1 Xylella fastidiosa strain ATCC 35879 contig1, whole genome shotgun sequence
37	228031	228067	GTAAGGAGAAGTAAGGAGAAGCATACGATCAGGTGTG	JQAP01000015.1 Xylella fastidiosa strain ATCC 35879 contig15, whole genome shotgun sequence
37	235111	235147	CAGTGCGCGATGCAGCCGTGCAATGGGGCCACGCAAT	JQAP01000014.1 Xylella fastidiosa strain ATCC 35879 contig14, whole genome shotgun sequence
37	241280	241316	AAATCATGCTTTCTTTGGGGGTGTTATGCTTGGTATG	JQAP01000001.1 Xylella fastidiosa strain ATCC 35879 contig1, whole genome shotgun sequence
37	247121	247157	TTTAGGTGCTTTTGTCCAGGCCGCTGTGCGTGATCAT	JQAP01000001.1 Xylella fastidiosa strain ATCC 35879 contig1, whole genome shotgun sequence
37	249124	249160	GAGCCTGTACGACATTGATATTGAGCAACCATCTAAA	JQAP01000015.1 Xylella fastidiosa strain ATCC 35879 contig15, whole genome shotgun sequence
37	249173	249209	CACGGTGAACCCGAGGTGGTCGCTATCGATAAAAGTG	JQAP01000014.1 Xylella fastidiosa strain ATCC 35879 contig14, whole genome shotgun sequence
37	252540	252576	GTTCTGTACTCTTTGCCATCGAAAGATGGCAAAGAGC	JQAP01000015.1 Xylella fastidiosa strain ATCC 35879 contig15, whole genome shotgun sequence
37	265825	265861	CATTGTAGACCGTACACCAAGCAGTAGCAAGATTCGT	JQAP01000004.1 Xylella fastidiosa strain ATCC 35879 contig4, whole genome shotgun sequence
37	269857	269893	CCCACAACAACAATACCCACAACGACACCACAGACAC	JQAP01000014.1 Xylella fastidiosa strain ATCC 35879 contig14, whole genome shotgun sequence
37	273947	273983	GGGTAGGCATGACGCCCATCGCCCTGATGGGGTTCAC	JQAP01000014.1 Xylella fastidiosa strain ATCC 35879 contig14, whole genome shotgun sequence
37	274803	274839	TTGCACTAGATGGCCTAAATTGTTCAAGACCGCGAAG	JQAP01000001.1 Xylella fastidiosa strain ATCC 35879 contig1, whole genome shotgun sequence
37	284403	284439	ACCTTTAGAAGCAGTTGGTTTGATTTTAATTAAGTCA	JQAP01000015.1 Xylella fastidiosa strain ATCC 35879 contig15, whole genome shotgun sequence
37	284748	284784	ACCAGCAGCTAAAGCATCCTCAGCTTTAGCGCCAGAT	JQAP01000015.1 Xylella fastidiosa strain ATCC 35879 contig15, whole genome shotgun sequence
37	293625	293661	AGCAGCCATACCGATGTCATCAGAAAAAACCACCCCC	JQAP01000014.1 Xylella fastidiosa strain ATCC 35879 contig14, whole genome shotgun sequence
37	297052	297088	AGATGACGCAATGCTCATCAGCGATCAGGGGGATTGA	JQAP01000001.1 Xylella fastidiosa strain ATCC 35879 contig1, whole genome shotgun sequence
37	308815	308851	GGGGGTAATTTCAACCAGAGTGCGCAAAAACAAGCGC	JQAP01000014.1 Xylella fastidiosa strain ATCC 35879 contig14, whole genome shotgun sequence
37	308890	308926	TATCTCAGGATCAGGATCCTTGCCACGCTCAATACGT	JQAP01000014.1 Xylella fastidiosa strain ATCC 35879 contig14, whole genome shotgun sequence
37	310789	310825	GGTGAGGTTGTTGAATCCTTGTAACCTCAGGCGAGGC	JQAP01000004.1 Xylella fastidiosa strain ATCC 35879 contig4, whole genome shotgun sequence
37	320489	320525	CAGTCCCAATGCATGAAAGGTACAGATCGTCAATCCA	JQAP01000015.1 Xylella fastidiosa strain ATCC 35879 contig15, whole genome shotgun sequence
37	320753	320789	CATTTTGATGCGGTCTTCATAAATCTTGGCGACACGT	JQAP01000004.1 Xylella fastidiosa strain ATCC 35879 contig4, whole genome shotgun sequence
37	323494	323530	TTAAAAAATCAATCGAAGACATATGCTCAATTGCAAC	JQAP01000015.1 Xylella fastidiosa strain ATCC 35879 contig15, whole genome shotgun sequence
37	323532	323568	CTTCATCACGCAATGCCATCCGTAGCATCATTTGTGA	JQAP01000015.1 Xylella fastidiosa strain ATCC 35879 contig15, whole genome shotgun sequence
37	323776	323812	TGACTTGTCCAGATAGCACCAAAGCCATTGAATACAA	JQAP01000015.1 Xylella fastidiosa strain ATCC 35879 contig15, whole genome shotgun sequence
37	329261	329297	TTTCAGAAGGCATTGATTACCTACATCGCAACCATGC	JQAP01000015.1 Xylella fastidiosa strain ATCC 35879 contig15, whole genome shotgun sequence
37	358642	358678	CAGCATACTTGTAGCCAAGGCCCTTCCCAATAAGGGC	JQAP01000004.1 Xylella fastidiosa strain ATCC 35879 contig4, whole genome shotgun sequence
37	402985	403021	TTTGATTGATCTTCTGTAGCATTACTTGAATCTAATT	JQAP01000004.1 Xylella fastidiosa strain ATCC 35879 contig4, whole genome shotgun sequence
37	424902	424938	CCCCATCGTCTTCATGGCGCGGGCAGCCGCACCGATG	JQAP01000014.1 Xylella fastidiosa strain ATCC 35879 contig14, whole genome shotgun sequence
37	473900	473936	TGCATAAGGAGAACTATGCTTCTACTCGATTAGTGGC	JQAP01000004.1 Xylella fastidiosa strain ATCC 35879 contig4, whole genome shotgun sequence
37	484276	484312	TGTGCTGTTGTTGTTGCTTGGATCATTCACTAGCTGG	JQAP01000004.1 Xylella fastidiosa strain ATCC 35879 contig4, whole genome shotgun sequence
37	496059	496095	TCAATCGCATCAACTTCTCAGTAAATCCACATCACAG	JQAP01000014.1 Xylella fastidiosa strain ATCC 35879 contig14, whole genome shotgun sequence
37	611533	611569	TGAGTTATCAGGCGGAATGGCACGGCGCGTAGCGCTG	JQAP01000014.1 Xylella fastidiosa strain ATCC 35879 contig14, whole genome shotgun sequence
37	683658	683694	AGTGACCGGTGTCGGCGATGTAATCCGCTGTGGCGGT	JQAP01000014.1 Xylella fastidiosa strain ATCC 35879 contig14, whole genome shotgun sequence
37	688149	688185	ATCAATGCATATGAGAATATCGCTCTACTCTTCCAGG	JQAP01000014.1 Xylella fastidiosa strain ATCC 35879 contig14, whole genome shotgun sequence
36	1367	1402	GCTACATAAGGCTGCGCGTACCCCGCACGATAGACG	JQAP01000004.1 Xylella fastidiosa strain ATCC 35879 contig4, whole genome shotgun sequence
36	5680	5715	GCGGCAAGAGGCAGGATGAAGGATAGAGCGGCGATG	JQAP01000002.1 Xylella fastidiosa strain ATCC 35879 contig2, whole genome shotgun sequence
36	11249	11284	CTATGGACTGGTCCGACCAGTTCAGGTTATCTGTAC	JQAP01000001.1 Xylella fastidiosa strain ATCC 35879 contig1, whole genome shotgun sequence
36	13586	13621	CGGTCAGATTGATCCAGATGGTGCGAATTGCCAGCA	JQAP01000002.1 Xylella fastidiosa strain ATCC 35879 contig2, whole genome shotgun sequence
36	29821	29856	GCATACCAAGTCTGTGAACCTTGCAATCCATTGATT	JQAP01000012.1 Xylella fastidiosa strain ATCC 35879 contig12, whole genome shotgun sequence
36	40878	40913	CACGTTTTGGAGACGGCCGATGACTGCGCCCATGAG	JQAP01000004.1 Xylella fastidiosa strain ATCC 35879 contig4, whole genome shotgun sequence
36	49594	49629	CCTCCCTATCATGTTCTCCAAAATGAGGGATCAGAT	JQAP01000001.1 Xylella fastidiosa strain ATCC 35879 contig1, whole genome shotgun sequence
36	58919	58954	TTCGACTGTCTCGCCAAGCAGTAATGTGCGCAAGCG	JQAP01000016.1 Xylella fastidiosa strain ATCC 35879 contig16, whole genome shotgun sequence
36	61474	61509	GCGGTCATGGATATCGTGAAATAAAATGATGCCACG	JQAP01000016.1 Xylella fastidiosa strain ATCC 35879 contig16, whole genome shotgun sequence
36	63472	63507	CATCGCAACTTTCGCAATGGAGTGAAGCAATGCATG	JQAP01000001.1 Xylella fastidiosa strain ATCC 35879 contig1, whole genome shotgun sequence
36	67311	67346	TGTTTATTTGATTGAGGAACCGATGGCCGCAGCGAT	JQAP01000004.1 Xylella fastidiosa strain ATCC 35879 contig4, whole genome shotgun sequence
36	70456	70491	ATATGAAGACTTCCCTCTTGGCTCTCAGCCTTCTTT	JQAP01000012.1 Xylella fastidiosa strain ATCC 35879 contig12, whole genome shotgun sequence
36	74108	74143	GCTGATGCGGTGATTGTCCCGGTGATGGCTTCGGCA	JQAP01000002.1 Xylella fastidiosa strain ATCC 35879 contig2, whole genome shotgun sequence
36	77556	77591	ACGCCGCTGCGTCTGTGTGAGAAAACCCAGGCCATG	JQAP01000014.1 Xylella fastidiosa strain ATCC 35879 contig14, whole genome shotgun sequence
36	90754	90789	CTGCCTCTCGCAGTGAGATAGCGCGATCTTGCTCCG	JQAP01000004.1 Xylella fastidiosa strain ATCC 35879 contig4, whole genome shotgun sequence
36	90791	90826	ATGCCCAAACCGTCCGTTGCCGTAACCAAAACATTG	JQAP01000004.1 Xylella fastidiosa strain ATCC 35879 contig4, whole genome shotgun sequence
36	91585	91620	CAAACCCCACGGTGAACCGTCATCTCGGACATACGC	JQAP01000012.1 Xylella fastidiosa strain ATCC 35879 contig12, whole genome shotgun sequence
36	114692	114727	TTAATCTGGGTACAACATGATCATTGTTAGCATGGG	JQAP01000001.1 Xylella fastidiosa strain ATCC 35879 contig1, whole genome shotgun sequence
36	117136	117171	GACTTGGGCGTTAGCGTTAGCATTTCTGGTGGTGGT	JQAP01000004.1 Xylella fastidiosa strain ATCC 35879 contig4, whole genome shotgun sequence
36	125116	125151	CGTATCGTCGAGAGGGTTTTCTGCGTAACTTTTGCC	JQAP01000004.1 Xylella fastidiosa strain ATCC 35879 contig4, whole genome shotgun sequence
36	125473	125508	CAAATCGTCGAGATACAGGACAGCATCAGGTGTAGG	JQAP01000004.1 Xylella fastidiosa strain ATCC 35879 contig4, whole genome shotgun sequence
36	146087	146122	GTCAAGGTTTTGATGTATCATGGAGATATTTTCAGT	JQAP01000002.1 Xylella fastidiosa strain ATCC 35879 contig2, whole genome shotgun sequence
36	152978	153013	TATGCTTCCAACTTCCTATAATTTTTGGTAAAATAC	JQAP01000002.1 Xylella fastidiosa strain ATCC 35879 contig2, whole genome shotgun sequence
36	155007	155042	CGTGGTTTTGGTTATCAGCCTGCTGTTGTCCGTCGT	JQAP01000002.1 Xylella fastidiosa strain ATCC 35879 contig2, whole genome shotgun sequence
36	157378	157413	CAGTTTTTACCCTTAACCCTAGGTTTCTGGTGGTAC	JQAP01000004.1 Xylella fastidiosa strain ATCC 35879 contig4, whole genome shotgun sequence
36	157859	157894	AACCGACATTTGACAGTGTGTGCTCCGATGATGATG	JQAP01000004.1 Xylella fastidiosa strain ATCC 35879 contig4, whole genome shotgun sequence
36	161144	161179	GTGTGAGAATCATCTCCTTAGCATTTTCTGATCTAA	JQAP01000002.1 Xylella fastidiosa strain ATCC 35879 contig2, whole genome shotgun sequence
36	162550	162585	ACGGCTGTAACTCAACCCATTCATACGAGCCGCCGC	JQAP01000015.1 Xylella fastidiosa strain ATCC 35879 contig15, whole genome shotgun sequence
36	181089	181124	GCACCGTGTAACCCTGCTTTGGCTGCTGCGTAGTTA	JQAP01000001.1 Xylella fastidiosa strain ATCC 35879 contig1, whole genome shotgun sequence
36	195780	195815	TTCTATACGCGTGAAGTGGCTGAATCGAAGGTTGCG	JQAP01000004.1 Xylella fastidiosa strain ATCC 35879 contig4, whole genome shotgun sequence
36	201670	201705	TCCTACAAAGATCAGTTTGCCAGTCGAATCTCTAGC	JQAP01000002.1 Xylella fastidiosa strain ATCC 35879 contig2, whole genome shotgun sequence
36	204681	204716	TTGTACGATGAAGCCTTACGTATTGTGACCGAGACG	JQAP01000004.1 Xylella fastidiosa strain ATCC 35879 contig4, whole genome shotgun sequence
36	205693	205728	CCTGTCAGACACGATGGAGGTCAAACGAATCAGGGG	JQAP01000015.1 Xylella fastidiosa strain ATCC 35879 contig15, whole genome shotgun sequence
36	205969	206004	GATGTCATCCTCGAACAGCATTACGGTGATTGCAAA	JQAP01000004.1 Xylella fastidiosa strain ATCC 35879 contig4, whole genome shotgun sequence
36	208912	208947	CGACGATGGGAAAACGGTCGCGGCGATGGATGTGTT	JQAP01000015.1 Xylella fastidiosa strain ATCC 35879 contig15, whole genome shotgun sequence
36	211263	211298	GTCCGTGAGTCACGGGCTGAGCTAGAGCGTCAGCAC	JQAP01000004.1 Xylella fastidiosa strain ATCC 35879 contig4, whole genome shotgun sequence
36	233554	233589	CTTTCATTTCAAGCTCTCCTACTTTTCAATATTTTT	JQAP01000014.1 Xylella fastidiosa strain ATCC 35879 contig14, whole genome shotgun sequence
36	245787	245822	GCGACATCAGGCATCAGACAGACTTCACCATGCACC	JQAP01000014.1 Xylella fastidiosa strain ATCC 35879 contig14, whole genome shotgun sequence
36	254212	254247	TAGCCAATCACGAAGGGTGTGTGCAGAGACCCCAGG	JQAP01000015.1 Xylella fastidiosa strain ATCC 35879 contig15, whole genome shotgun sequence
36	254642	254677	AATAACGCATTGCGCTACTATCGCAACATGTTACTA	JQAP01000014.1 Xylella fastidiosa strain ATCC 35879 contig14, whole genome shotgun sequence
36	262017	262052	TCCCCTACGTAGCAAGCTACGGCACCCCAAACGGCG	JQAP01000014.1 Xylella fastidiosa strain ATCC 35879 contig14, whole genome shotgun sequence
36	262126	262161	CGGACATTTACGCGACCATCGACAGCGTCAAACCCG	JQAP01000014.1 Xylella fastidiosa strain ATCC 35879 contig14, whole genome shotgun sequence
36	274024	274059	ATACGTGTCAGCGCCCGCAACAGCCACATCCACGTG	JQAP01000014.1 Xylella fastidiosa strain ATCC 35879 contig14, whole genome shotgun sequence
36	286369	286404	AAAACGGGACTCAAACAAGAACCCACGAAATTCACG	JQAP01000015.1 Xylella fastidiosa strain ATCC 35879 contig15, whole genome shotgun sequence
36	299673	299708	GCGGTTGATAAGGGGTGGACGTTGACGGCGTCGGGT	JQAP01000004.1 Xylella fastidiosa strain ATCC 35879 contig4, whole genome shotgun sequence
36	307941	307976	ATACTCAGACCATCGCCAATACTGGCCTGACGCCAA	JQAP01000014.1 Xylella fastidiosa strain ATCC 35879 contig14, whole genome shotgun sequence
36	308576	308611	ATCGCGCTCAATCTGTAACGTTGCAGTGGCACGAAA	JQAP01000014.1 Xylella fastidiosa strain ATCC 35879 contig14, whole genome shotgun sequence
36	308880	308915	TTTCGTTTTGCCGAGTAGGCGGCGCGCCAACTCTGT	JQAP01000004.1 Xylella fastidiosa strain ATCC 35879 contig4, whole genome shotgun sequence
36	311552	311587	TGCACCATATGCATATTGCGAAAATAGTTTAAGTAA	JQAP01000014.1 Xylella fastidiosa strain ATCC 35879 contig14, whole genome shotgun sequence
36	333847	333882	ACCGATATTACCCTCTTGTATTAAGTCGCCTAAAGA	JQAP01000015.1 Xylella fastidiosa strain ATCC 35879 contig15, whole genome shotgun sequence
36	354721	354756	AAATTGATTAATTTTGGATGCGTACACACTCAAAAG	JQAP01000014.1 Xylella fastidiosa strain ATCC 35879 contig14, whole genome shotgun sequence
36	354931	354966	TTCTGCCAATGTCTGTTTGAAATCAGTGATGCGCCT	JQAP01000014.1 Xylella fastidiosa strain ATCC 35879 contig14, whole genome shotgun sequence
36	358836	358871	CCTTCGAGTCATTCAAGCAAGCATAGCTTTTAGTTG	JQAP01000004.1 Xylella fastidiosa strain ATCC 35879 contig4, whole genome shotgun sequence
36	371961	371996	AGCATCATCTGATGATGCTGGCAGCGCAAATTGTGA	JQAP01000004.1 Xylella fastidiosa strain ATCC 35879 contig4, whole genome shotgun sequence
36	374149	374184	ACCTGAACGGAGCCACTGATGGCTCTGACTCTTTCC	JQAP01000014.1 Xylella fastidiosa strain ATCC 35879 contig14, whole genome shotgun sequence
36	380757	380792	TGCTGCCCTAGGGGGCACGGGCGCGGTGAAGTGTGG	JQAP01000004.1 Xylella fastidiosa strain ATCC 35879 contig4, whole genome shotgun sequence
36	397811	397846	TTTTGATCAGGTATTCAACGACGGATCAACCTGAAT	JQAP01000004.1 Xylella fastidiosa strain ATCC 35879 contig4, whole genome shotgun sequence
36	402484	402519	TGTCCCCCCATGAAGCCGACAACCAGCTGGATTTGA	JQAP01000014.1 Xylella fastidiosa strain ATCC 35879 contig14, whole genome shotgun sequence
36	407550	407585	GCACACGCCCACCTGCCGTGACGACGCGTCCCGCCA	JQAP01000004.1 Xylella fastidiosa strain ATCC 35879 contig4, whole genome shotgun sequence
36	432372	432407	GGTATCGGCGCATGAAACTCAAACCACTGCGATGCG	JQAP01000004.1 Xylella fastidiosa strain ATCC 35879 contig4, whole genome shotgun sequence
36	443229	443264	TTTAGTAGCAGCTGCGGTAGCGCCAGTAGCAGGAGG	JQAP01000004.1 Xylella fastidiosa strain ATCC 35879 contig4, whole genome shotgun sequence
36	480701	480736	CCTCTAATAGCAATAGTACCATCATACTTTCAGCAA	JQAP01000004.1 Xylella fastidiosa strain ATCC 35879 contig4, whole genome shotgun sequence
36	496601	496636	GTTGATGTTATTAGGAAGAATGGCCCGGCCACGCGC	JQAP01000004.1 Xylella fastidiosa strain ATCC 35879 contig4, whole genome shotgun sequence
36	568901	568936	CTACGCAAATCGTGGTCGGCACGATCACGCTGTCCA	JQAP01000014.1 Xylella fastidiosa strain ATCC 35879 contig14, whole genome shotgun sequence
36	615766	615801	GGAGCGCATGAGGTAATCGGATAGGACATTGAGCAT	JQAP01000014.1 Xylella fastidiosa strain ATCC 35879 contig14, whole genome shotgun sequence
36	616423	616458	TTCGGCATACAGGCCCTCGGTCGGCAGGAACATCAC	JQAP01000014.1 Xylella fastidiosa strain ATCC 35879 contig14, whole genome shotgun sequence
36	654560	654595	CCCATCAACAGACCGGATAACAACATCACCCCAACT	JQAP01000014.1 Xylella fastidiosa strain ATCC 35879 contig14, whole genome shotgun sequence
36	684792	684827	CCATGACTGCCCTCTGCGCTTATCGGCAATGGCAGT	JQAP01000014.1 Xylella fastidiosa strain ATCC 35879 contig14, whole genome shotgun sequence
36	735461	735496	TGAAAAATCAGCAGCAACCGGACAGACTAACGCCGT	JQAP01000014.1 Xylella fastidiosa strain ATCC 35879 contig14, whole genome shotgun sequence
36	736524	736559	GCAAAAAATACCGCAATCACATGGCCAATTCTTCCA	JQAP01000014.1 Xylella fastidiosa strain ATCC 35879 contig14, whole genome shotgun sequence
35	1614	1648	AAAAGCATAGAGGTAAGGAACCAAATGCGTTTCAG	JQAP01000001.1 Xylella fastidiosa strain ATCC 35879 contig1, whole genome shotgun sequence
35	2610	2644	ACCGTATGAGCGCCAAGCACGTACTCAAGGCGTTC	JQAP01000004.1 Xylella fastidiosa strain ATCC 35879 contig4, whole genome shotgun sequence
35	4597	4631	CCGATACGCTTGATGGGGCACAGTACGCGCGCCTG	JQAP01000004.1 Xylella fastidiosa strain ATCC 35879 contig4, whole genome shotgun sequence
35	33787	33821	ACGCAACGACCACAGATCATCCTTGGGGAGAGCGT	JQAP01000012.1 Xylella fastidiosa strain ATCC 35879 contig12, whole genome shotgun sequence
35	40498	40532	CATCGCTATGATGATTCGGGATTTTTAAAAGCCGC	JQAP01000004.1 Xylella fastidiosa strain ATCC 35879 contig4, whole genome shotgun sequence
35	43702	43736	TTGTTGCGCATGATCGCTGGGTTGGAAGATATCAG	JQAP01000002.1 Xylella fastidiosa strain ATCC 35879 contig2, whole genome shotgun sequence
35	44463	44497	ATTGGAGGCGACTATCGAAGCGTTGGAGCCAGTCG	JQAP01000002.1 Xylella fastidiosa strain ATCC 35879 contig2, whole genome shotgun sequence
35	46294	46328	TCTTCCTTTCGCTGGGAGTACTTGTCATCGCTGCA	JQAP01000002.1 Xylella fastidiosa strain ATCC 35879 contig2, whole genome shotgun sequence
35	51648	51682	AGCAGGCGCTTGGTGTTGGTGCGCGTTATGCTGGT	JQAP01000004.1 Xylella fastidiosa strain ATCC 35879 contig4, whole genome shotgun sequence
35	56385	56419	TACATCACAAATCACCTGTAACCTGGTGTATAAAA	JQAP01000014.1 Xylella fastidiosa strain ATCC 35879 contig14, whole genome shotgun sequence
35	59767	59801	ATCCCAGAGATCCGTGAGAAACTTGCTCAACTTCA	JQAP01000001.1 Xylella fastidiosa strain ATCC 35879 contig1, whole genome shotgun sequence
35	60901	60935	CATTAAACCCAAACCGCTATAGCAAGCATCCATCA	JQAP01000016.1 Xylella fastidiosa strain ATCC 35879 contig16, whole genome shotgun sequence
35	70385	70419	CATGCCTTTGACAGTCAGGTTCTCAATGCCAATGG	JQAP01000014.1 Xylella fastidiosa strain ATCC 35879 contig14, whole genome shotgun sequence
35	71452	71486	GACCAGCCGTCCTATCTGACCTTGATGATGGCATC	JQAP01000014.1 Xylella fastidiosa strain ATCC 35879 contig14, whole genome shotgun sequence
35	73472	73506	TGTGCTTCCCATCAAGTGTGGAGCAGAATCCAGTT	JQAP01000001.1 Xylella fastidiosa strain ATCC 35879 contig1, whole genome shotgun sequence
35	81668	81702	TTGGCTACGCCGCTTGTGGGAACGGATGACGGCGC	JQAP01000012.1 Xylella fastidiosa strain ATCC 35879 contig12, whole genome shotgun sequence
35	89017	89051	ACTCAATCCAGATGAGCTACAGCGTCACCAAAGCC	JQAP01000012.1 Xylella fastidiosa strain ATCC 35879 contig12, whole genome shotgun sequence
35	91263	91297	GGCACATTCTCCATCGTCACTAGGTCCGGCTTGAG	JQAP01000004.1 Xylella fastidiosa strain ATCC 35879 contig4, whole genome shotgun sequence
35	93177	93211	TGCGAGCCATCCACGATTTCCAACGTACCGTCCTC	JQAP01000004.1 Xylella fastidiosa strain ATCC 35879 contig4, whole genome shotgun sequence
35	93479	93513	TTTTTGCTTTTCCATGGCGTGCCGTTCGATGATTG	JQAP01000004.1 Xylella fastidiosa strain ATCC 35879 contig4, whole genome shotgun sequence
35	93875	93909	AAGGTAAGCAGAGTGCTTACCAAGAAAATCATCAT	JQAP01000001.1 Xylella fastidiosa strain ATCC 35879 contig1, whole genome shotgun sequence
35	105652	105686	ATGTTGCGGACGTAGAAGCGGGAAGTGACGGTGTT	JQAP01000002.1 Xylella fastidiosa strain ATCC 35879 contig2, whole genome shotgun sequence
35	111395	111429	TGACATCTCTACCGACCTACGTATGATTGCCCACG	JQAP01000014.1 Xylella fastidiosa strain ATCC 35879 contig14, whole genome shotgun sequence
35	111988	112022	TATTTACACATTCTCTAAATGCGTAGGTATGTGAG	JQAP01000002.1 Xylella fastidiosa strain ATCC 35879 contig2, whole genome shotgun sequence
35	114923	114957	AATCTCCACAGGTAAAAATACGTTTTCCAGTGCTT	JQAP01000001.1 Xylella fastidiosa strain ATCC 35879 contig1, whole genome shotgun sequence
35	117254	117288	TGTACGATTTTTCGCCGCTGGGTTTGGTTGAGATG	JQAP01000002.1 Xylella fastidiosa strain ATCC 35879 contig2, whole genome shotgun sequence
35	117404	117438	CACTGGTACGCGAAACAGCGATCCTAGCAGTCCAA	JQAP01000014.1 Xylella fastidiosa strain ATCC 35879 contig14, whole genome shotgun sequence
35	121551	121585	AAAAAACTGCATAGCCCAGAGATTCACCAAATAAA	JQAP01000014.1 Xylella fastidiosa strain ATCC 35879 contig14, whole genome shotgun sequence
35	127826	127860	ATGTGGTTTGATGCCCTGCTGTTTATATCCGCCGA	JQAP01000004.1 Xylella fastidiosa strain ATCC 35879 contig4, whole genome shotgun sequence
35	145337	145371	ATTGATGATTTGAGGATCAATACCATAATCGTTGA	JQAP01000002.1 Xylella fastidiosa strain ATCC 35879 contig2, whole genome shotgun sequence
35	149225	149259	TGGTGAAGTTCTTTGTTTCGTTGCTTAGGAAGGGG	JQAP01000002.1 Xylella fastidiosa strain ATCC 35879 contig2, whole genome shotgun sequence
35	157748	157782	TGAATAATTTGGATGGACAGGATGAATGTGGGCGC	JQAP01000004.1 Xylella fastidiosa strain ATCC 35879 contig4, whole genome shotgun sequence
35	157899	157933	GCAGTCCATGATTGTACCGTATAGCGGTATTACCT	JQAP01000015.1 Xylella fastidiosa strain ATCC 35879 contig15, whole genome shotgun sequence
35	158256	158290	GTTGTCAATGTGGTTTGGATGCAATTCGACGTTAT	JQAP01000002.1 Xylella fastidiosa strain ATCC 35879 contig2, whole genome shotgun sequence
35	159214	159248	CTGAGAAATAAATCCATATTTCTATGTAAAGAATA	JQAP01000002.1 Xylella fastidiosa strain ATCC 35879 contig2, whole genome shotgun sequence
35	167351	167385	TGAGCAGATGAAGATTGGCTCCTCTCGATAGTTTT	JQAP01000002.1 Xylella fastidiosa strain ATCC 35879 contig2, whole genome shotgun sequence
35	167449	167483	GGATAGCATTAAGTTAATTAATAAATGCTGACTTT	JQAP01000002.1 Xylella fastidiosa strain ATCC 35879 contig2, whole genome shotgun sequence
35	173788	173822	TGAATTAAAATCCAGATTGCGAGCATAACCGTTAC	JQAP01000014.1 Xylella fastidiosa strain ATCC 35879 contig14, whole genome shotgun sequence
35	200916	200950	TAGATTGATGAACGAAAAAAACATGCTAATGATGG	JQAP01000004.1 Xylella fastidiosa strain ATCC 35879 contig4, whole genome shotgun sequence
35	205467	205501	TTAGAGGATGGATGCGCTACTTCTTTGCGGTACTG	JQAP01000001.1 Xylella fastidiosa strain ATCC 35879 contig1, whole genome shotgun sequence
35	243717	243751	GCCAAGTCGGAAGCCGAGCAGCTTGCCGCCCGTCG	JQAP01000001.1 Xylella fastidiosa strain ATCC 35879 contig1, whole genome shotgun sequence
35	245070	245104	AAAGTTCTTATGCCGAATCAGATAAGGTCGTCATT	JQAP01000004.1 Xylella fastidiosa strain ATCC 35879 contig4, whole genome shotgun sequence
35	248374	248408	CCAGCGTAAAACCCAAAAACTGGCCTTTTTGCGCA	JQAP01000014.1 Xylella fastidiosa strain ATCC 35879 contig14, whole genome shotgun sequence
35	254751	254785	TCTAACCAACAATCGTATTAAATACCTCAAAAGAT	JQAP01000015.1 Xylella fastidiosa strain ATCC 35879 contig15, whole genome shotgun sequence
35	264257	264291	GTAGATGAGTAGTTGGACAGCACATTCTCCGATAC	JQAP01000014.1 Xylella fastidiosa strain ATCC 35879 contig14, whole genome shotgun sequence
35	265389	265423	TTCACTTGGGTGATGTGACCTTATGTGATCGCGAT	JQAP01000004.1 Xylella fastidiosa strain ATCC 35879 contig4, whole genome shotgun sequence
35	267043	267077	AGGTGCGTTGCACTTGGAGGCGCTTGGACGCGGTT	JQAP01000001.1 Xylella fastidiosa strain ATCC 35879 contig1, whole genome shotgun sequence
35	275498	275532	GTGAGGGTGCGGTTAACTGGATCTTAATCTTACTG	JQAP01000001.1 Xylella fastidiosa strain ATCC 35879 contig1, whole genome shotgun sequence
35	283313	283347	GATGACACAGCAAAAGTTTCACTTTTGTCATCAGC	JQAP01000015.1 Xylella fastidiosa strain ATCC 35879 contig15, whole genome shotgun sequence
35	289528	289562	TTCGGCCAATTGATTAAGACGAGGATCAGGAACAG	JQAP01000015.1 Xylella fastidiosa strain ATCC 35879 contig15, whole genome shotgun sequence
35	290829	290863	ATAACTACAGTCAAAAATTTTCTTTTTTGAAATTT	JQAP01000014.1 Xylella fastidiosa strain ATCC 35879 contig14, whole genome shotgun sequence
35	297522	297556	AACATCCTGAAAATGCATACATCAATACTGATAAA	JQAP01000014.1 Xylella fastidiosa strain ATCC 35879 contig14, whole genome shotgun sequence
35	316518	316552	CTCCATTTCTAAATATAATCAACGCATAAGAATTA	JQAP01000015.1 Xylella fastidiosa strain ATCC 35879 contig15, whole genome shotgun sequence
35	326634	326668	CAATGTCCGCAACAATGCCATGCTCCGCACAGAAA	JQAP01000014.1 Xylella fastidiosa strain ATCC 35879 contig14, whole genome shotgun sequence
35	330815	330849	TGTTCGCGATTGGTGTGTTGGTGTTGGGGCTGTAT	JQAP01000001.1 Xylella fastidiosa strain ATCC 35879 contig1, whole genome shotgun sequence
35	345095	345129	ATGTTCAACTCAACAGGCATGCAGTAGCCCTTTCT	JQAP01000004.1 Xylella fastidiosa strain ATCC 35879 contig4, whole genome shotgun sequence
35	369085	369119	GCAATGGTGGTGTGTTAATCGTGGGTTGCAATGAT	JQAP01000004.1 Xylella fastidiosa strain ATCC 35879 contig4, whole genome shotgun sequence
35	374910	374944	GTTCGTATCCAGGAAGAGTTCGTAGCAAGAAGTGT	JQAP01000014.1 Xylella fastidiosa strain ATCC 35879 contig14, whole genome shotgun sequence
35	470012	470046	CCGACTGACTGGCCGTGGCCGGCGGGACGTTGCTA	JQAP01000014.1 Xylella fastidiosa strain ATCC 35879 contig14, whole genome shotgun sequence
35	478413	478447	GAACTATAAAAGTGACATAGAAAGGAAAAGAAGCG	JQAP01000004.1 Xylella fastidiosa strain ATCC 35879 contig4, whole genome shotgun sequence
35	483442	483476	TTCGACGGCGGTCCTGTCGGAATCGAGTCACTCGC	JQAP01000004.1 Xylella fastidiosa strain ATCC 35879 contig4, whole genome shotgun sequence
35	489498	489532	TTCATCGCTTTGAATGACCAGAGCGGCATAATAAT	JQAP01000004.1 Xylella fastidiosa strain ATCC 35879 contig4, whole genome shotgun sequence
35	496827	496861	TTGTCACGTGCACGCAGTGGCTGTGGCGGTGTAGG	JQAP01000004.1 Xylella fastidiosa strain ATCC 35879 contig4, whole genome shotgun sequence
35	526393	526427	GAGTCGATGTGGTTGCACACCCGCAAACCAATATC	JQAP01000014.1 Xylella fastidiosa strain ATCC 35879 contig14, whole genome shotgun sequence
35	615716	615750	CTTTTTTCGCAAATTGTGTCAAGGGTAACCAACGT	JQAP01000014.1 Xylella fastidiosa strain ATCC 35879 contig14, whole genome shotgun sequence
35	663701	663735	GGTGCATCTTGATCAAATACCGTATTTCGGAAACC	JQAP01000014.1 Xylella fastidiosa strain ATCC 35879 contig14, whole genome shotgun sequence
35	679294	679328	CGCGAGGTCGCCAGCGACAATGGTACCGGTGGCTG	JQAP01000014.1 Xylella fastidiosa strain ATCC 35879 contig14, whole genome shotgun sequence
35	685532	685566	ATCACAACAACACTAATGCATAACCATATCGGCCA	JQAP01000014.1 Xylella fastidiosa strain ATCC 35879 contig14, whole genome shotgun sequence
35	688443	688477	AGTGTAGTACAGGATCATCACCAACTTGACGAATG	JQAP01000014.1 Xylella fastidiosa strain ATCC 35879 contig14, whole genome shotgun sequence
35	692929	692963	TTACATTTTAGAAAAAGATAGACATTTATTATGCC	JQAP01000014.1 Xylella fastidiosa strain ATCC 35879 contig14, whole genome shotgun sequence
35	708750	708784	ACGCATGGCTGGCCGGATACACCCCATTCGTATCA	JQAP01000014.1 Xylella fastidiosa strain ATCC 35879 contig14, whole genome shotgun sequence
35	759072	759106	ACTGACCAAACGCTTCCCCCCTCCAGCTACAGAGG	JQAP01000014.1 Xylella fastidiosa strain ATCC 35879 contig14, whole genome shotgun sequence
34	15057	15090	TCGCCCTTGAGGCGTCGCCTACTGTTAAGTAACA	JQAP01000014.1 Xylella fastidiosa strain ATCC 35879 contig14, whole genome shotgun sequence
34	16797	16830	GGCCAGGTTTCTCTTTTACCGTCTTCACGTGCTC	JQAP01000002.1 Xylella fastidiosa strain ATCC 35879 contig2, whole genome shotgun sequence
[truncated: 1,346 more rows]
